# Supplementary material for: Development and validation of a two glycolysis-related LncRNAs prognostic signature for glioma and in vitro analyses
Source: Cell Div. 2023 Jun 24;18:10. doi: 10.1186/s13008-023-00092-9 (PMC10290322; doi:10.1186/s13008-023-00092-9)
Supplement: Supplementary file 1 — Additional file 1. Glycolysis genes download from the Molecular Signatures. [file 13008_2023_92_MOESM1_ESM.xlsx]

## Sheet: Sheet1
GAPDH
GPI
HK1
ABCB6
ADORA2B
AGL
AGRN
AK3
AK4
AKR1A1
ALDH7A1
ALDH9A1
ALDOA
ALDOB
ALG1
ANG
ANGPTL4
ANKZF1
ARPP19
ARTN
AURKA
B3GALT6
B3GAT1
B3GAT3
B3GNT3
B4GALT1
B4GALT2
B4GALT4
B4GALT7
BIK
BPNT1
CACNA1H
CAPN5
CASP6
CD44
CDK1
CENPA
CHPF
CHPF2
CHST1
CHST12
CHST2
CHST4
CHST6
CITED2
CLDN3
CLDN9
CLN6
COG2
COL5A1
COPB2
CTH
CXCR4
CYB5A
DCN
DDIT4
DEPDC1
DLD
DPYSL4
DSC2
ECD
EFNA3
EGFR
EGLN3
ELF3
ENO1
ENO2
ERO1A
EXT1
EXT2
FAM162A
FBP2
FKBP4
FUT8
G6PD
GAL3ST1
GALE
GALK1
GALK2
GAPDHS
GCLC
GFPT1
GLCE
GLRX
GMPPA
GMPPB
GNE
GNPDA1
GOT1
GOT2
GPC1
GPC3
GPC4
GPR87
GUSB
GYS1
GYS2
HAX1
HDLBP
HK2
HMMR
HOMER1
HS2ST1
HS6ST2
HSPA5
IDH1
IDUA
IER3
IGFBP3
IL13RA1
IRS2
ISG20
KDELR3
KIF20A
KIF2A
LCT
LDHA
LDHC
LHPP
LHX9
MDH1
MDH2
ME1
ME2
MED24
MERTK
MET
MIF
MIOX
MPI
MXI1
NANP
NASP
NDST3
NDUFV3
NOL3
NSDHL
NT5E
P4HA1
P4HA2
PAM
PAXIP1
PC
PDK3
PFKFB1
PFKP
PGAM1
PGAM2
PGK1
PGLS
PGM2
PHKA2
PKM
PKP2
PLOD1
PLOD2
PMM2
POLR3K
PPFIA4
PPIA
PPP2CB
PRPS1
PSMC4
PYGB
PYGL
QSOX1
RARS1
RBCK1
RPE
RRAGD
SAP30
SDC1
SDC2
SDC3
SDHC
SLC16A3
SLC25A10
SLC25A13
SLC35A3
SLC37A4
SOD1
SOX9
SPAG4
SRD5A3
STC1
STC2
STMN1
TALDO1
TFF3
TGFA
TGFBI
TKTL1
TPBG
TPI1
TPST1
GFUS
TXN
UGP2
VCAN
VEGFA
VLDLR
XYLT2
ZNF292
ADH1A
ADH1B
ADH1C
ADH4
ADH5
ADH6
GALM
ADH7
LDHAL6A
DLAT
ENO3
ALDH2
ALDH3A1
ALDH1B1
ALDH1A3
FBP1
ALDH3B1
ALDH3B2
ALDH3A2
ALDOC
G6PC
GCK
HK3
LDHB
PGAM4
PCK1
PCK2
PDHA1
PDHA2
PDHB
PFKL
PFKM
PGK2
PGM1
PKLR
ACSS2
G6PC2
BPGM
ACSS1
LDHAL6B
NUP160
TPR
NDC1
NUP133
PRKACA
NUP37
GCKR
SEH1L
NUP50
AAAS
NUP188
RAE1
NUP93
PPP2R1A
NUP88
NUP98
NUP107
PPP2R5D
NUP155
PPP2CA
PFKFB4
NUP43
PFKFB2
NUP153
NUP85
NUP214
NUP210
NUP42
PPP2R1B
NUP54
NUP58
PRKACB
RANBP2
NUP205
SEC13
ADPGK
NUP35
GNPDA2
PRKACG
PGM2L1
PFKFB3
PGP
POM121
NUP62
POM121C
FOXK1
FOXK2
SLC4A1
