# Supplementary material for: Development and validation of a two glycolysis-related LncRNAs prognostic signature for glioma and in vitro analyses
Source: Cell Div. 2023 Jun 24;18:10. doi: 10.1186/s13008-023-00092-9 (PMC10290322; doi:10.1186/s13008-023-00092-9)
Supplement: Supplementary file 2 — Additional file 2. Enrichment score for each KEGG pathway in each sample within each cluster. [file 13008_2023_92_MOESM2_ESM.xlsx]

## Sheet: ssGSEA推算
id	TCGA-06-0680-11A-32R-A36H-07	TCGA-06-AABW-11A-31R-A36H-07	TCGA-06-0675-11A-32R-A36H-07	TCGA-06-0678-11A-32R-A36H-07	TCGA-06-0681-11A-41R-A36H-07	TCGA-CS-4943-01A-01R-1470-07	TCGA-HT-7607-01A-11R-2090-07	TCGA-VV-A86M-01A-11R-A36H-07	TCGA-06-2563-01A-01R-1849-01	TCGA-06-0139-01A-01R-1849-01	TCGA-28-5209-01A-01R-1850-01	TCGA-28-5213-01A-01R-1850-01	TCGA-06-5858-01A-01R-1849-01	TCGA-41-2572-01A-01R-1850-01	TCGA-27-2519-01A-01R-1850-01	TCGA-19-2624-01A-01R-1850-01	TCGA-27-1830-01A-01R-1850-01	TCGA-06-0878-01A-01R-1849-01	TCGA-26-5134-01A-01R-1850-01	TCGA-26-1442-01A-01R-1850-01	TCGA-12-3652-01A-01R-1849-01	TCGA-DH-A669-01A-12R-A31N-07	TCGA-06-2565-01A-01R-1849-01	TCGA-06-2559-01A-01R-1849-01	TCGA-P5-A730-01A-11R-A32Q-07	TCGA-HT-7478-01A-11R-2027-07	TCGA-CS-5393-01A-01R-1470-07	TCGA-VV-A829-01A-21R-A36H-07	TCGA-S9-A6WM-01A-12R-A33Z-07	TCGA-DU-A7T6-01A-11R-A33Z-07	TCGA-06-2570-01A-01R-1849-01	TCGA-DU-7292-01A-11R-2027-07	TCGA-HT-7680-01A-11R-2256-07	TCGA-CS-6670-01A-11R-1896-07	TCGA-HT-7690-01A-11R-2256-07	TCGA-DU-7011-01A-11R-2027-07	TCGA-16-0846-01A-01R-1850-01	TCGA-06-0238-01A-02R-1849-01	TCGA-FG-A87Q-01A-11R-A36H-07	TCGA-DH-A66G-01A-21R-A31N-07	TCGA-FG-A60L-01A-12R-A31N-07	TCGA-HT-7857-01A-11R-2403-07	TCGA-S9-A7R1-01A-12R-A34R-07	TCGA-HT-7616-01A-11R-2256-07	TCGA-HT-7474-01A-11R-2027-07	TCGA-WY-A859-01A-12R-A36H-07	TCGA-P5-A737-01A-11R-A32Q-07	TCGA-QH-A6X8-01A-12R-A32Q-07	TCGA-DU-8166-01A-11R-2256-07
2-Oxocarboxylic acid metabolism	0.242241	0.225934	0.24137	0.220942	0.236508	0.240044	0.238923	0.232831	0.26949	0.220402	0.241995	0.220326	0.252866	0.266509	0.216441	0.264675	0.241394	0.220921	0.234393	0.244518	0.272146	0.246198	0.247802	0.267355	0.237297	0.232863	0.235702	0.238604	0.237597	0.237611	0.252685	0.242575	0.215684	0.23216	0.230346	0.236468	0.228477	0.235756	0.253794	0.230452	0.249245	0.235317	0.238768	0.222415	0.245059	0.252487	0.232805	0.22898	0.225432
ABC transporters	-0.0387795	-0.0298952	-0.0390919	-0.0585772	-0.046333	-0.0599985	-0.0234292	-0.0351612	-0.0137293	-0.0107726	-0.0328627	-0.0400842	-0.011483	-0.00890473	-0.0367195	-0.0288692	-0.00511678	-0.0216981	-0.0487965	-0.00950842	-0.0398508	-0.0199828	-0.0129674	-0.0306147	-0.0179127	-0.0223343	-0.0404442	-0.0282571	-0.0214309	-0.0387567	-0.0390131	-0.0447574	-0.0294016	-0.0329775	-0.0384256	-0.0285353	-0.026792	-0.0721834	0.0148396	-0.0345863	-0.0390843	0.000940084	-0.0393362	-0.000727559	-0.0292204	-0.0627007	-0.033936	-0.0228843	-0.0517584
Acute myeloid leukemia	0.152718	0.145578	0.16429	0.17663	0.161615	0.217227	0.160673	0.210632	0.197524	0.222511	0.203331	0.198288	0.21067	0.189272	0.204414	0.182646	0.223443	0.217878	0.192624	0.1933	0.164494	0.206082	0.199975	0.207174	0.176681	0.226761	0.211106	0.19461	0.19442	0.185047	0.230261	0.168609	0.188061	0.186698	0.207163	0.20882	0.218623	0.197585	0.196103	0.206798	0.199084	0.243425	0.1758	0.210561	0.163096	0.165588	0.193993	0.190967	0.207149
Adherens junction	0.245156	0.2332	0.25101	0.253081	0.236877	0.266529	0.262652	0.26374	0.261776	0.227157	0.272708	0.21801	0.27107	0.240755	0.259061	0.237546	0.268401	0.282407	0.249539	0.268217	0.206646	0.230353	0.267165	0.26184	0.268269	0.288956	0.282795	0.287417	0.256885	0.234925	0.274008	0.283183	0.264184	0.260813	0.272818	0.288607	0.255311	0.222149	0.258819	0.289295	0.228054	0.272507	0.253876	0.28419	0.263359	0.241293	0.252667	0.258346	0.288145
Adipocytokine signaling pathway	0.154556	0.144234	0.159133	0.165276	0.159729	0.114222	0.155112	0.120979	0.130427	0.150652	0.109584	0.129343	0.130816	0.138855	0.11637	0.100039	0.129055	0.129618	0.0960962	0.144752	0.126616	0.113984	0.126491	0.121262	0.143423	0.145123	0.148931	0.141659	0.115814	0.125433	0.125699	0.14471	0.181486	0.149003	0.134477	0.14445	0.140945	0.107517	0.150669	0.155411	0.145792	0.157945	0.149412	0.169444	0.149388	0.129328	0.123773	0.133739	0.147009
Adrenergic signaling in cardiomyocytes	0.221462	0.155491	0.219125	0.2088	0.213322	0.129685	0.205991	0.104376	0.113305	0.0884245	0.106385	0.073084	0.105588	0.101438	0.0900538	0.115912	0.0990397	0.0902678	0.107196	0.144835	0.0890281	0.117378	0.104755	0.118119	0.120956	0.142904	0.14998	0.133585	0.0957164	0.154089	0.125607	0.192594	0.132285	0.16171	0.144455	0.153872	0.115682	0.106725	0.126682	0.185094	0.125989	0.114749	0.168178	0.138021	0.191257	0.191054	0.155728	0.15357	0.16724
African trypanosomiasis	0.00818788	-0.04303	0.0189255	0.059025	0.0681652	0.0365031	0.0246423	-0.00828189	0.0283136	0.110765	0.00915085	0.0807885	0.0121848	0.069804	0.0522563	-0.0175184	0.0700546	0.0912827	0.00262976	0.0341335	0.00076645	-0.0424832	-0.0144785	-0.00184511	-0.0534621	0.0965208	0.0108959	-0.0640407	-0.0729964	-0.0146857	0.0518306	-0.00527053	0.0612607	0.0299407	0.0506082	0.0645461	0.0696285	0.0333629	0.0442044	0.0967262	0.0569075	0.118525	0.026763	0.0297536	0.00381456	0.0160152	-0.0374685	-0.0269886	0.0857824
AGE-RAGE signaling pathway in diabetic complications	0.161276	0.13225	0.171328	0.212056	0.182172	0.1694	0.168128	0.190163	0.21057	0.246703	0.236274	0.230459	0.22852	0.214456	0.224317	0.192363	0.252669	0.256494	0.198962	0.192074	0.168698	0.165677	0.215973	0.221579	0.182834	0.22303	0.166438	0.190365	0.192077	0.175997	0.237296	0.198752	0.224037	0.168236	0.217772	0.229513	0.198679	0.187099	0.204445	0.231812	0.166915	0.257103	0.176157	0.211486	0.161107	0.139623	0.16349	0.157452	0.218767
Alanine	0.231463	0.207106	0.222909	0.232716	0.228174	0.14539	0.229229	0.146205	0.14904	0.12679	0.140177	0.156403	0.170723	0.143041	0.148867	0.152168	0.172305	0.131041	0.157694	0.19998	0.137982	0.183916	0.131238	0.161773	0.184052	0.175638	0.160833	0.131682	0.137863	0.182668	0.129821	0.205062	0.151706	0.167701	0.160364	0.194949	0.190192	0.159759	0.193843	0.198826	0.173947	0.138057	0.175681	0.165818	0.239523	0.213947	0.155702	0.146758	0.177972
Alcoholism	0.0845001	0.0834645	0.0821654	0.100119	0.0893076	0.0995593	0.0683417	0.0537955	0.0491307	0.0611394	0.0516112	0.0620109	0.0588324	0.0484747	0.062773	0.0671394	0.0580053	0.0352749	0.223694	0.0586244	0.0752786	0.0576674	0.0316104	0.0660273	0.0618137	0.051408	0.0699444	0.0427691	0.0552003	0.075514	0.0657157	0.0861809	0.0520254	0.0756059	0.0535212	0.0641338	0.0689976	0.110774	0.062809	0.0756887	0.0539937	0.0512278	0.0762317	0.0609755	0.0746039	0.0774986	0.0533445	0.0653826	0.0661568
Aldosterone-regulated sodium reabsorption	0.194312	0.149648	0.202549	0.203104	0.181733	0.126674	0.174857	0.110782	0.0858163	0.0671984	0.107463	0.0499311	0.109377	0.0738369	0.0789252	0.0963172	0.0992188	0.0888812	0.0891073	0.109282	0.054889	0.0812426	0.0632647	0.0968769	0.113917	0.135582	0.147665	0.117465	0.0790804	0.143016	0.102049	0.181014	0.112086	0.152536	0.119411	0.149548	0.114516	0.0948287	0.11521	0.166452	0.0991878	0.0931449	0.164768	0.131096	0.168651	0.162543	0.113517	0.12055	0.146639
Aldosterone synthesis and secretion	0.218662	0.14296	0.217476	0.227061	0.211838	0.132566	0.20352	0.0836499	0.101919	0.0537477	0.099724	0.0420015	0.0781854	0.0918126	0.0614544	0.114447	0.0841212	0.0649954	0.0967675	0.127621	0.077567	0.102211	0.0853459	0.109082	0.103014	0.143268	0.143656	0.1057	0.0969724	0.141739	0.109682	0.201255	0.11878	0.159629	0.133054	0.150266	0.113117	0.0830348	0.115838	0.195023	0.10418	0.106389	0.153947	0.122139	0.190842	0.19555	0.134614	0.14918	0.161967
Allograft rejection	-0.00705719	0.0338109	0.0189074	-0.0109063	0.0108947	0.0732374	0.0706576	0.109814	0.15012	0.272587	0.0981039	0.216189	0.145629	0.152366	0.182092	0.0230114	0.16929	0.167072	0.121918	0.0879245	0.110003	0.127622	0.161862	0.109776	0.0744836	0.215195	0.0750938	0.110194	0.116319	0.0548473	0.139544	0.0270974	0.169024	-0.0493067	0.170704	0.155418	0.162781	0.189121	0.161858	0.134106	0.0927865	0.268334	-0.0291897	0.161334	0.00950929	-0.0358676	0.016046	-0.0212838	0.052632
alpha-Linolenic acid metabolism	-0.0819589	-0.0511625	-0.0824383	-0.0712619	-0.0883473	-0.115117	-0.0765482	-0.0946573	-0.044213	-0.0211942	-0.0664676	0.0166847	-0.0717385	0.0116284	-0.0125232	-0.0793513	-0.0317841	-0.0260436	-0.0576042	-0.0449791	-0.0313077	-0.0647928	-0.0741621	-0.068162	-0.0652194	-0.0663995	-0.0765505	-0.0965238	-0.0312275	-0.0796014	-0.071618	-0.0612076	-0.0164278	-0.0900111	-0.0833317	-0.0655813	-0.0505311	-0.0548001	-0.0282076	-0.0739388	-0.053512	0.00409089	-0.0872734	-0.0846643	-0.070265	-0.0780964	-0.0654683	-0.0584939	-0.078753
Alzheimer disease	0.269165	0.248917	0.269154	0.271557	0.270846	0.248602	0.261461	0.2517	0.261088	0.25457	0.250424	0.251149	0.247999	0.258	0.25302	0.243889	0.248869	0.254019	0.241155	0.260088	0.260647	0.250802	0.247291	0.247047	0.253353	0.254739	0.251783	0.250386	0.243177	0.259219	0.248703	0.263295	0.249124	0.258928	0.261467	0.259597	0.252691	0.256896	0.248424	0.25649	0.254937	0.252381	0.260432	0.254557	0.262126	0.266641	0.249366	0.246173	0.256602
Amino sugar and nucleotide sugar metabolism	0.126072	0.132759	0.117835	0.124991	0.127883	0.121981	0.114722	0.149394	0.161953	0.264311	0.16345	0.233037	0.210305	0.191616	0.206573	0.16273	0.18383	0.196404	0.166193	0.132903	0.210833	0.159939	0.139773	0.173079	0.169297	0.146082	0.116457	0.147412	0.158207	0.145244	0.157624	0.120293	0.165629	0.124123	0.136553	0.148555	0.169275	0.183358	0.16051	0.107436	0.166875	0.181607	0.108806	0.150877	0.124209	0.132722	0.133544	0.128915	0.103328
Aminoacyl-tRNA biosynthesis	0.2595	0.255184	0.255309	0.253188	0.258433	0.304462	0.25576	0.298535	0.307875	0.262397	0.305116	0.279896	0.277164	0.288223	0.281148	0.280576	0.286661	0.28363	0.266014	0.283028	0.305716	0.306678	0.29963	0.283849	0.280911	0.270331	0.261632	0.282316	0.271911	0.277529	0.284809	0.252855	0.238274	0.262058	0.265857	0.261945	0.273877	0.284954	0.250963	0.236925	0.281561	0.247558	0.274292	0.294039	0.270612	0.260633	0.264679	0.265562	0.254488
Amoebiasis	0.0542368	0.0223373	0.0650565	0.0944513	0.072439	0.0483561	0.0605869	0.0544232	0.116702	0.177784	0.126385	0.146683	0.124259	0.11159	0.113326	0.068188	0.15221	0.162682	0.0811385	0.0802391	0.0780227	0.0504767	0.112292	0.111018	0.0495762	0.115449	0.0501272	0.0649882	0.0922936	0.074775	0.115775	0.0837984	0.0933457	0.0467668	0.10912	0.111523	0.0769063	0.0776098	0.0969973	0.12701	0.0482266	0.172113	0.0608204	0.103963	0.0583493	0.0260191	0.0307356	0.0358355	0.0918761
Amphetamine addiction	0.284407	0.223524	0.289831	0.28998	0.282877	0.149437	0.25881	0.140967	0.167855	0.0982197	0.135728	0.0918737	0.113832	0.134993	0.120136	0.192692	0.142108	0.120771	0.152838	0.178095	0.130431	0.137847	0.133659	0.146712	0.152222	0.196161	0.20332	0.173871	0.142755	0.213573	0.143189	0.26665	0.177618	0.232947	0.194217	0.214925	0.164012	0.166867	0.156721	0.259091	0.142187	0.163189	0.242002	0.186146	0.244812	0.249891	0.187872	0.186677	0.219089
AMPK signaling pathway	0.192977	0.195809	0.191956	0.195267	0.184356	0.195977	0.187152	0.188944	0.179039	0.160491	0.178619	0.144067	0.184039	0.171857	0.154938	0.181988	0.184173	0.173728	0.176224	0.193244	0.16719	0.18397	0.180863	0.190223	0.194127	0.184345	0.200267	0.195588	0.178583	0.189554	0.183821	0.193027	0.194831	0.199897	0.182767	0.189933	0.178344	0.161573	0.190782	0.190251	0.177802	0.175262	0.195304	0.199501	0.192356	0.189831	0.185905	0.193623	0.193552
Amyotrophic lateral sclerosis	0.285579	0.275605	0.2853	0.288926	0.28772	0.276365	0.284774	0.277248	0.293823	0.283009	0.276222	0.284199	0.275975	0.286054	0.286381	0.281577	0.275562	0.2815	0.276392	0.286244	0.29217	0.279675	0.278327	0.281268	0.282929	0.281445	0.273206	0.272792	0.271181	0.282367	0.275793	0.284867	0.275171	0.282062	0.284265	0.283222	0.279484	0.294998	0.270871	0.277555	0.279186	0.271402	0.284903	0.283078	0.284564	0.287616	0.27297	0.271555	0.275616
Antifolate resistance	-0.00156101	0.0409829	-0.00357698	0.0249574	0.0268053	0.132066	0.0245959	0.0978359	0.093405	0.162097	0.0942746	0.160615	0.113946	0.090839	0.136559	0.0961042	0.163523	0.151996	0.0838951	0.0634467	0.0963673	0.126853	0.113218	0.111333	0.0709234	0.11168	0.0612394	0.0854289	0.0652886	0.09388	0.110715	0.0300683	0.119943	0.0634641	0.0923249	0.0639731	0.0905453	0.112226	0.0717359	0.0771653	0.0891962	0.181461	0.0336916	0.0805912	0.0310053	0.0263638	0.0847402	0.0604608	0.0722568
Antigen processing and presentation	0.175699	0.207098	0.188426	0.177006	0.187853	0.255323	0.220787	0.243875	0.272083	0.317622	0.239925	0.292828	0.276524	0.274272	0.287498	0.211441	0.277914	0.279255	0.274615	0.25233	0.246447	0.265329	0.266488	0.257269	0.244032	0.32589	0.240049	0.249587	0.258395	0.226166	0.279393	0.205605	0.269903	0.188517	0.293075	0.287483	0.282313	0.298888	0.277273	0.259193	0.24448	0.328719	0.196993	0.277195	0.204266	0.176919	0.215518	0.1925	0.242548
Apelin signaling pathway	0.193066	0.158411	0.193491	0.197748	0.184251	0.157679	0.192253	0.148685	0.15812	0.148266	0.156374	0.129918	0.151109	0.152316	0.144042	0.14738	0.155675	0.152434	0.150405	0.180133	0.133161	0.144989	0.155457	0.165377	0.162468	0.185615	0.173776	0.150333	0.146007	0.166776	0.167541	0.193654	0.181467	0.161901	0.1741	0.193659	0.155906	0.144311	0.164121	0.193894	0.153744	0.179054	0.163394	0.160955	0.188932	0.167614	0.160623	0.143727	0.177756
Apoptosis	0.169721	0.172752	0.172949	0.184963	0.177449	0.195926	0.187348	0.20397	0.218422	0.247267	0.219214	0.239077	0.223466	0.220216	0.226393	0.199519	0.235008	0.234266	0.206365	0.206372	0.204637	0.222573	0.219344	0.217473	0.209319	0.224399	0.194502	0.208533	0.214631	0.200645	0.216906	0.195723	0.217706	0.197049	0.218131	0.206681	0.224715	0.211911	0.215017	0.206936	0.203307	0.244903	0.194619	0.236092	0.187269	0.176946	0.1992	0.19731	0.200933
Apoptosis - multiple species	0.132957	0.165915	0.137489	0.168622	0.147443	0.164831	0.169612	0.147881	0.164325	0.206757	0.157472	0.195425	0.183372	0.18619	0.176212	0.162738	0.163896	0.176121	0.180733	0.165946	0.215733	0.17701	0.172988	0.172787	0.18109	0.182761	0.17504	0.14687	0.162762	0.169117	0.176564	0.169987	0.16217	0.175571	0.175367	0.163086	0.188091	0.18289	0.173702	0.152227	0.195573	0.204102	0.156926	0.178155	0.166451	0.143618	0.163134	0.181059	0.147455
Arachidonic acid metabolism	-0.0690188	-0.0563166	-0.0655943	-0.0729362	-0.0619397	-0.0794839	-0.0606299	-0.06517	-0.0247872	0.058598	-0.0362422	0.0606149	-0.0456828	0.0113099	0.00645094	-0.0607688	0.00879602	0.0096754	-0.0403676	-0.0392964	-0.0178644	-0.0439313	-0.0322059	-0.0409766	-0.0516055	-0.0187685	-0.0397056	-0.0636508	-0.030258	-0.0487985	-0.0428919	-0.0549683	0.0360667	-0.0595646	-0.0411247	-0.0243437	-0.00454037	-0.0150178	0.0179802	-0.0701426	-0.00266543	0.0264602	-0.0726095	-0.0387196	-0.0597916	-0.0636143	-0.0593844	-0.0440282	-0.0592072
Arginine and proline metabolism	0.227271	0.240294	0.222932	0.229771	0.237878	0.194179	0.242639	0.156333	0.218493	0.221982	0.208283	0.218503	0.226328	0.230777	0.206045	0.187312	0.217738	0.208894	0.20422	0.225718	0.223746	0.197736	0.197314	0.193109	0.225732	0.216413	0.224375	0.16592	0.203346	0.240507	0.200161	0.221737	0.249865	0.216098	0.207153	0.231877	0.233204	0.210227	0.24675	0.195452	0.240459	0.195621	0.203545	0.19732	0.244279	0.232821	0.189487	0.210892	0.196807
Arginine biosynthesis	0.111664	0.0736948	0.106871	0.0988528	0.101579	0.0178153	0.0992312	0.0281653	0.0751203	0.059887	0.0862315	0.0764072	0.0640665	0.0775326	0.0113228	0.0344988	0.0438553	0.0461861	0.0271886	0.0789927	0.0917416	0.0816913	0.0494623	0.0340153	0.0773672	0.0494135	0.0399104	0.0160372	0.0445265	0.0962305	0.038646	0.0948702	0.0576741	0.0558183	0.0353921	0.0599014	0.0561248	0.0447814	0.04528	0.0827998	0.05133	0.0470223	0.070987	0.0554601	0.0961656	0.0894767	0.03245	0.0262417	0.0578654
Arrhythmogenic right ventricular cardiomyopathy	0.124348	0.0849618	0.12606	0.126388	0.111165	0.0518724	0.132136	0.0363008	0.0715185	0.044914	0.0747055	0.0344265	0.0884939	0.0489129	0.0646762	0.0729794	0.0772718	0.0876443	0.056972	0.0672336	0.0306534	0.0505216	0.0759476	0.0776888	0.0677144	0.0595202	0.0679197	0.0723797	0.0841776	0.0762748	0.0706792	0.131595	0.0777208	0.0855385	0.0678995	0.0883096	0.0543663	0.0380169	0.0734688	0.116463	0.040185	0.103747	0.078018	0.0795049	0.10807	0.0974697	0.0728814	0.0719275	0.0927647
Ascorbate and aldarate metabolism	-0.160685	-0.153811	-0.155684	-0.173375	-0.16299	-0.154276	-0.143434	-0.192372	-0.132733	-0.148359	-0.135511	-0.114391	-0.106959	-0.125636	-0.113612	-0.140524	-0.113012	-0.128157	-0.129017	-0.146193	-0.138472	-0.151737	-0.154478	-0.151996	-0.134826	-0.129317	-0.127459	-0.145867	-0.107764	-0.151666	-0.135175	-0.143565	-0.126657	-0.147394	-0.16118	-0.123564	-0.11335	-0.112129	-0.107846	-0.169206	-0.128764	-0.143886	-0.140657	-0.160546	-0.148152	-0.149637	-0.157124	-0.1454	-0.142696
Asthma	-0.0813668	-0.0341849	-0.0432779	-0.0886985	-0.0608819	0.0211757	0.0148335	0.0659108	0.0904238	0.204002	0.0339259	0.155108	0.0993918	0.0853004	0.121769	-0.0388154	0.117172	0.103311	0.0616528	0.0360083	0.0250704	0.0476775	0.149189	0.0558315	0.00444298	0.171775	0.0269385	0.0644506	0.0522444	-0.020063	0.0924516	-0.0468011	0.114785	-0.132167	0.123305	0.127069	0.0934005	0.148947	0.11084	0.0838304	0.024485	0.237164	-0.119658	0.0866084	-0.0791514	-0.113906	-0.0510321	-0.106354	-0.0122594
Autoimmune thyroid disease	-0.111898	-0.0783912	-0.0931617	-0.113776	-0.099354	-0.0453376	-0.0460847	-0.0169871	0.0160044	0.11461	-0.0249093	0.0711038	0.00994824	0.0132245	0.0503203	-0.0828687	0.0304453	0.0259693	-0.00802422	-0.018599	-0.0224522	0.0191077	0.0261616	-0.0157335	-0.0493351	0.066691	-0.0426934	-0.0161679	-0.0147226	-0.0608921	0.0100518	-0.0832531	0.0204824	-0.147339	0.0496531	0.0211929	0.0319086	0.0478212	0.0187666	0.00258374	-0.0333923	0.101806	-0.129927	0.0321161	-0.0977211	-0.130592	-0.0962473	-0.122889	-0.0657571
Autophagy - animal	0.266736	0.262025	0.270297	0.264457	0.261108	0.250906	0.260493	0.252983	0.239642	0.245341	0.238067	0.232473	0.253563	0.2334	0.241617	0.223493	0.250283	0.246627	0.220102	0.257291	0.235772	0.238761	0.242759	0.240465	0.25087	0.256308	0.258726	0.257286	0.233713	0.231686	0.240866	0.253093	0.259688	0.252012	0.253551	0.2557	0.237221	0.232076	0.248937	0.263306	0.240368	0.24671	0.250312	0.262967	0.262234	0.253645	0.240732	0.244555	0.256122
Autophagy - other	0.262983	0.284653	0.263742	0.260033	0.261764	0.254413	0.2603	0.237895	0.243259	0.248575	0.229011	0.249077	0.255458	0.227097	0.261686	0.220855	0.247025	0.247066	0.214896	0.250507	0.250282	0.244108	0.233805	0.219974	0.251402	0.253172	0.242862	0.252282	0.251142	0.229876	0.224118	0.244299	0.249713	0.251304	0.24991	0.242233	0.237736	0.246356	0.248099	0.24474	0.259973	0.233541	0.24162	0.254782	0.263735	0.254529	0.235781	0.256164	0.247534
Axon guidance	0.214185	0.165847	0.207054	0.208827	0.202474	0.161332	0.207436	0.149371	0.147773	0.109027	0.167615	0.10466	0.153033	0.134106	0.141513	0.151585	0.155978	0.147734	0.141556	0.165153	0.111609	0.141563	0.13914	0.145048	0.160241	0.180563	0.178379	0.167747	0.147573	0.174987	0.168778	0.21215	0.139189	0.182768	0.179484	0.192724	0.159554	0.144974	0.152918	0.19472	0.142714	0.15503	0.171329	0.155288	0.200154	0.187817	0.172572	0.171932	0.207505
B cell receptor signaling pathway	0.114538	0.128616	0.122315	0.130605	0.126867	0.149192	0.125627	0.156336	0.146766	0.231288	0.140807	0.178928	0.15894	0.136407	0.169838	0.103158	0.148298	0.167571	0.115394	0.140785	0.105802	0.128289	0.128879	0.141244	0.11103	0.205427	0.173757	0.132885	0.113937	0.114165	0.171284	0.122679	0.149916	0.112634	0.168896	0.18227	0.163092	0.155077	0.170812	0.142197	0.161978	0.229915	0.107966	0.158896	0.126977	0.109258	0.122089	0.146139	0.155616
Bacterial invasion of epithelial cells	0.284395	0.2935	0.286574	0.300084	0.284591	0.287578	0.294924	0.301993	0.2827	0.276327	0.3002	0.275538	0.305057	0.276136	0.302305	0.293765	0.314384	0.307306	0.294472	0.309656	0.250071	0.278053	0.289348	0.315192	0.300986	0.310916	0.304862	0.302088	0.284075	0.293179	0.311605	0.307839	0.281074	0.294194	0.308869	0.318348	0.284217	0.275561	0.306218	0.311359	0.27588	0.315204	0.278791	0.309772	0.293912	0.276668	0.274788	0.287789	0.304767
Basal cell carcinoma	0.00691733	0.00474456	0.013753	0.032745	0.0178249	0.0536273	0.0153682	0.0753184	0.0583699	0.0155897	0.0935473	0.0321951	0.0531593	0.0694378	0.0448264	0.0392403	0.0557802	0.0588642	0.0562886	0.0414228	0.056916	0.0829647	0.0650656	0.0384758	0.0679904	0.0450115	0.0573033	0.0622845	0.100085	0.0554824	0.0871029	0.0503068	0.0575986	0.060891	0.0583376	0.047785	0.0558287	0.039998	0.0588285	0.0557663	0.0529254	0.0581771	0.0473549	0.0614158	0.0355013	0.056592	0.0748735	0.0655516	0.0831359
Basal transcription factors	0.134044	0.155332	0.135659	0.141264	0.137957	0.191771	0.135832	0.211302	0.191226	0.165992	0.182782	0.180997	0.178404	0.165827	0.169754	0.179202	0.157152	0.175383	0.161724	0.182071	0.187425	0.185144	0.1731	0.178793	0.187346	0.160769	0.170366	0.189789	0.162664	0.161261	0.162306	0.135882	0.163018	0.164802	0.176533	0.163344	0.149523	0.181525	0.140361	0.143803	0.144964	0.148117	0.172879	0.177616	0.143659	0.160247	0.169391	0.168914	0.181951
Base excision repair	0.166994	0.219216	0.163514	0.15393	0.183344	0.275689	0.176104	0.253177	0.2496	0.247497	0.264977	0.257182	0.250234	0.271999	0.222896	0.267687	0.226364	0.226557	0.2581	0.231727	0.281833	0.287923	0.245295	0.253955	0.242932	0.210302	0.195525	0.203344	0.252592	0.263575	0.240571	0.196332	0.190068	0.211836	0.224878	0.192944	0.232706	0.261229	0.216746	0.182331	0.259252	0.214799	0.210421	0.196902	0.187596	0.220738	0.240513	0.249683	0.186469
beta-Alanine metabolism	0.180291	0.206217	0.172668	0.182158	0.185851	0.148904	0.216692	0.0914126	0.149271	0.157306	0.111946	0.15556	0.1587	0.136888	0.149146	0.116664	0.15269	0.14201	0.136272	0.176394	0.117979	0.113595	0.112063	0.109915	0.200331	0.173515	0.176113	0.135501	0.152111	0.15111	0.137221	0.180014	0.167136	0.171253	0.159427	0.192825	0.169215	0.143655	0.208636	0.16264	0.198274	0.153608	0.165934	0.151652	0.206625	0.173739	0.156561	0.182798	0.158826
Bile secretion	-0.0123404	-0.0299453	-0.0153556	-0.0112647	-0.0228781	-0.0395801	0.00364329	-0.0780532	-0.049348	-0.0727778	-0.0473683	-0.0579757	-0.0487058	-0.0352659	-0.0430882	-0.0388887	-0.0319769	-0.0552769	-0.0632449	-0.0077166	-0.0648992	-0.0714227	-0.0485129	-0.0426062	-0.0230509	-0.0197665	-0.0140916	-0.0563887	-0.0313671	-0.0375998	-0.0375302	-0.0117384	-0.0135351	-0.0220306	-0.0331448	-0.0130144	-0.0327828	-0.0743026	-2.54e-06	-0.00876767	-0.0287262	-0.0458235	-0.0291723	-0.0237179	0.00461548	-0.0166733	-0.0416083	-0.0333241	-0.0182869
Biosynthesis of amino acids	0.211346	0.205025	0.213095	0.210644	0.210872	0.221581	0.225689	0.214763	0.227325	0.225879	0.240449	0.239292	0.24038	0.238191	0.216658	0.219504	0.22375	0.217044	0.205143	0.239084	0.243283	0.239169	0.21759	0.229014	0.23048	0.221166	0.213088	0.216575	0.215104	0.231917	0.223715	0.222681	0.225575	0.2245	0.206035	0.221965	0.23236	0.223287	0.218802	0.21369	0.238628	0.193842	0.22478	0.225188	0.224855	0.227997	0.218561	0.213131	0.208708
Biosynthesis of cofactors	0.0922899	0.100633	0.0929152	0.0791124	0.0969722	0.10119	0.0975153	0.0953085	0.124982	0.138056	0.110414	0.153973	0.115362	0.127744	0.130779	0.094761	0.1116	0.108175	0.094491	0.108686	0.149917	0.120399	0.0978471	0.0963965	0.106763	0.100443	0.0893977	0.0801759	0.110367	0.107547	0.101878	0.0937384	0.117572	0.0938858	0.102429	0.103129	0.127937	0.131286	0.115752	0.0737258	0.132998	0.0951866	0.0942612	0.089257	0.108928	0.104925	0.0932475	0.0953273	0.0697452
Biosynthesis of unsaturated fatty acids	0.250372	0.290203	0.254138	0.271039	0.246587	0.241645	0.285322	0.172982	0.260948	0.235147	0.250146	0.235481	0.248432	0.260972	0.245968	0.242044	0.218918	0.227698	0.219159	0.240902	0.265388	0.210485	0.209441	0.235613	0.251672	0.260007	0.246506	0.196753	0.238174	0.249406	0.216665	0.268813	0.253871	0.260228	0.235537	0.272681	0.246576	0.251955	0.268016	0.255957	0.233277	0.234033	0.228864	0.227243	0.295081	0.252228	0.208641	0.256332	0.252269
Biotin metabolism	0.0264094	0.106898	-0.0122855	0.00297679	-0.00975208	0.0913758	0.0541558	0.115191	0.0811653	0.163145	0.107761	0.2138	0.0955306	0.0817695	0.161911	0.0287602	0.15856	0.028254	0.0910825	0.0528732	0.193041	0.117546	0.151567	0.0508985	0.122426	0.143638	0.0754545	0.038889	0.147539	0.138485	0.0957422	0.0498392	0.187045	0.0778229	0.0290247	0.0568662	0.0704741	0.179112	0.0839519	0.054426	0.0675677	0.0197708	0.0515815	0.0526114	0.0668937	0.0487917	0.0841468	0.134638	0.0425343
Bladder cancer	0.125409	0.143566	0.13595	0.195869	0.15515	0.224042	0.142938	0.194298	0.248441	0.276014	0.291911	0.256306	0.259669	0.244777	0.273549	0.286788	0.26415	0.291032	0.262485	0.181161	0.241583	0.225218	0.262013	0.286944	0.204318	0.21462	0.190606	0.198496	0.200162	0.233171	0.29627	0.182076	0.189021	0.192175	0.209957	0.204064	0.24102	0.263431	0.202688	0.219081	0.193499	0.219722	0.216512	0.215777	0.158554	0.169773	0.200669	0.189414	0.231145
Breast cancer	0.0730673	0.060274	0.0693059	0.0870465	0.0738269	0.134515	0.0867856	0.133597	0.1221	0.0744456	0.144148	0.0708947	0.106472	0.111125	0.0907458	0.120238	0.124173	0.114031	0.122924	0.119415	0.102248	0.125733	0.138129	0.129958	0.125778	0.121014	0.120245	0.108502	0.14283	0.119515	0.136113	0.114162	0.101327	0.122614	0.120019	0.125926	0.114029	0.0805887	0.108333	0.123862	0.10488	0.119972	0.113361	0.128142	0.0960383	0.108246	0.116293	0.121728	0.139259
Butanoate metabolism	0.161942	0.114444	0.157834	0.141124	0.151766	0.0792896	0.161944	0.0516639	0.0955636	0.0473147	0.0459974	0.0936983	0.0651013	0.0712055	0.0866515	0.0824818	0.0763704	0.0678201	0.0623649	0.123376	0.0913181	0.0498568	0.0512014	0.0483384	0.121169	0.115004	0.116166	0.0670913	0.0865597	0.0770698	0.0625531	0.13462	0.142951	0.12607	0.102844	0.139868	0.0778285	0.0804999	0.103541	0.12859	0.111781	0.0795422	0.133487	0.0774646	0.149584	0.131599	0.0915404	0.0679276	0.131094
C-type lectin receptor signaling pathway	0.120331	0.0874035	0.124546	0.142512	0.133315	0.107849	0.116823	0.125658	0.116315	0.185075	0.122561	0.152695	0.119066	0.128887	0.133201	0.102084	0.157745	0.159655	0.0991858	0.121971	0.106382	0.0990852	0.127766	0.118563	0.0960499	0.166569	0.120123	0.128096	0.096242	0.0916901	0.125809	0.109685	0.162248	0.106842	0.12923	0.137154	0.140597	0.116703	0.134821	0.163332	0.1225	0.197198	0.115311	0.141705	0.115266	0.103862	0.104642	0.0961219	0.14738
Caffeine metabolism	-0.348374	-0.342174	-0.360494	-0.362146	-0.383268	-0.351326	-0.336322	-0.333539	-0.342839	-0.301404	-0.341555	-0.233524	-0.355011	-0.332106	-0.314618	-0.363702	-0.326384	-0.327795	-0.350121	-0.307688	-0.33403	-0.307771	-0.337707	-0.377004	-0.361583	-0.271942	-0.320547	-0.321912	-0.33178	-0.338106	-0.342962	-0.380632	-0.304976	-0.318702	-0.344749	-0.348901	-0.315251	-0.339322	-0.327469	-0.332482	-0.330192	-0.297257	-0.368746	-0.317447	-0.34636	-0.365556	-0.311525	-0.315632	-0.344392
Calcium signaling pathway	0.108653	0.0282528	0.10189	0.101165	0.0938945	-0.00651717	0.0902842	-0.0177997	0.00144271	-0.0137458	0.00102389	-0.0204744	0.0027094	0.00025714	-0.0184935	-0.0143738	-0.00685836	-0.013625	-0.0147083	0.029131	-0.019935	-0.0133808	-0.0141629	-0.00656744	0.00477208	0.034476	0.0303061	-0.00870416	-0.0061481	0.0232051	-0.000321095	0.0868102	0.0229345	0.040715	0.0266704	0.0481423	0.0124728	-0.0213512	0.0280741	0.0765807	0.0136827	0.00907483	0.0363838	0.0157884	0.0770661	0.0690482	0.019108	0.0142429	0.0425944
cAMP signaling pathway	0.1491	0.0949981	0.150413	0.145725	0.144649	0.0736698	0.138164	0.0569112	0.0674243	0.0246369	0.0573416	0.0201715	0.0472001	0.0508662	0.0406017	0.0745448	0.0465068	0.0422019	0.0549546	0.0930349	0.0381314	0.0599998	0.0503684	0.0653999	0.0705153	0.0945534	0.106101	0.0776103	0.0569178	0.0934559	0.0814802	0.138214	0.0689446	0.114188	0.103117	0.112096	0.0689289	0.0597117	0.0831666	0.124126	0.0692487	0.0581751	0.112064	0.0885873	0.123459	0.120057	0.0965447	0.0934682	0.118131
Carbohydrate digestion and absorption	0.0637846	0.0196733	0.0667132	0.0470318	0.0512766	0.0401953	0.0483754	0.049217	0.0124466	0.0277193	0.015361	0.0119592	0.0441093	0.00859191	0.0413592	0.0308954	0.0478957	0.0220338	0.0317303	0.0680517	-0.0140676	0.0141817	0.00606293	0.0378447	0.0244095	0.0666256	0.0622129	0.0319024	0.00675282	0.0434722	0.0559376	0.0481346	0.0319771	0.0521146	0.0608893	0.0650003	0.0333532	0.0138104	0.0380094	0.0642371	0.0451127	0.0552541	0.050605	0.045633	0.0511946	0.0577495	0.0466446	0.0457381	0.0511771
Carbon metabolism	0.255145	0.258636	0.257257	0.25024	0.251668	0.251193	0.275906	0.243764	0.268225	0.270596	0.258687	0.288178	0.27639	0.27279	0.267294	0.255022	0.256037	0.262225	0.247584	0.276331	0.271829	0.249042	0.249875	0.247015	0.27825	0.271471	0.251987	0.243151	0.256307	0.254268	0.260034	0.25891	0.279211	0.264846	0.250446	0.272451	0.26423	0.260454	0.270826	0.254644	0.267926	0.252958	0.255976	0.255563	0.275495	0.271252	0.252392	0.254815	0.250715
Cardiac muscle contraction	0.244548	0.163998	0.243959	0.229948	0.23702	0.150998	0.226722	0.138848	0.142984	0.133898	0.128233	0.125263	0.134525	0.138458	0.138314	0.161672	0.133213	0.121519	0.150137	0.176399	0.139667	0.149391	0.126057	0.142493	0.163387	0.153737	0.154389	0.157498	0.131856	0.190124	0.15264	0.205132	0.138936	0.189881	0.160262	0.17358	0.148009	0.163794	0.139781	0.190663	0.158233	0.132174	0.197243	0.170251	0.207489	0.216271	0.180391	0.179665	0.172767
Cell adhesion molecules	0.10134	0.108697	0.107616	0.112241	0.114634	0.110818	0.134367	0.08692	0.105604	0.169317	0.107018	0.133544	0.134512	0.118186	0.146669	0.0715356	0.149603	0.134541	0.114546	0.117594	0.072531	0.103105	0.109904	0.121703	0.0946646	0.167507	0.133775	0.103369	0.111351	0.0993627	0.133746	0.12465	0.134752	0.0984081	0.146245	0.164597	0.154311	0.143933	0.159861	0.138226	0.107388	0.192085	0.084036	0.143773	0.113543	0.0825019	0.0933222	0.0936584	0.131071
Cell cycle	0.109092	0.159304	0.112058	0.134079	0.118264	0.294844	0.133169	0.217594	0.247119	0.200135	0.280464	0.20627	0.27604	0.229971	0.235026	0.304865	0.226858	0.246894	0.285782	0.175693	0.246191	0.287891	0.23551	0.30059	0.207194	0.184825	0.173822	0.210576	0.241328	0.23577	0.261414	0.194347	0.162116	0.177797	0.196563	0.170215	0.224548	0.269171	0.181661	0.173056	0.175277	0.192367	0.169261	0.190787	0.144452	0.165929	0.196388	0.192362	0.187094
Cellular senescence	0.166551	0.153429	0.170969	0.193499	0.172572	0.236958	0.1787	0.216771	0.233752	0.225663	0.246172	0.216608	0.241169	0.222726	0.229097	0.245004	0.234108	0.244875	0.232192	0.200389	0.218863	0.238374	0.225477	0.261761	0.207036	0.215818	0.200973	0.215004	0.214604	0.214861	0.239384	0.208441	0.20859	0.196071	0.21154	0.203401	0.215831	0.226869	0.206141	0.216037	0.180346	0.229496	0.196786	0.220941	0.183292	0.176358	0.194952	0.191617	0.220264
Central carbon metabolism in cancer	0.226855	0.183795	0.226518	0.222087	0.210821	0.222961	0.224896	0.206217	0.217941	0.21839	0.246061	0.211631	0.240618	0.230702	0.214923	0.223476	0.231984	0.225678	0.211563	0.219481	0.230332	0.202685	0.226652	0.251268	0.202292	0.230372	0.230021	0.189141	0.201326	0.215041	0.236333	0.236877	0.22134	0.221674	0.222551	0.233303	0.227271	0.195965	0.22368	0.225643	0.202609	0.204779	0.204309	0.23009	0.22697	0.225274	0.209637	0.214564	0.222797
cGMP-PKG signaling pathway	0.174393	0.120464	0.172728	0.170813	0.16553	0.12725	0.16783	0.113971	0.111394	0.0989162	0.118742	0.0804052	0.114977	0.109834	0.0953775	0.102358	0.116966	0.100587	0.111026	0.133322	0.0900787	0.108504	0.0988012	0.127572	0.123732	0.140449	0.139571	0.126173	0.0997926	0.133526	0.123129	0.16248	0.138979	0.144637	0.134576	0.148172	0.108299	0.0973226	0.120677	0.167967	0.104697	0.120925	0.145933	0.136702	0.157772	0.147747	0.127285	0.128281	0.15369
Chagas disease	0.170917	0.14231	0.179123	0.197731	0.191741	0.151758	0.169837	0.159854	0.175504	0.227935	0.167456	0.208793	0.171338	0.166603	0.184777	0.133579	0.20611	0.208531	0.139964	0.162078	0.153061	0.14779	0.16506	0.172371	0.140055	0.216324	0.161116	0.169544	0.141586	0.15495	0.179418	0.162569	0.211739	0.160106	0.182741	0.180283	0.188067	0.179228	0.186161	0.210643	0.167048	0.238032	0.167398	0.185431	0.156303	0.144897	0.159152	0.152669	0.196908
Chemical carcinogenesis	-0.126417	-0.151872	-0.134396	-0.137412	-0.129034	-0.177698	-0.146613	-0.165015	-0.134213	-0.100719	-0.146886	-0.0638879	-0.15263	-0.133186	-0.130018	-0.159256	-0.122917	-0.13042	-0.167943	-0.139769	-0.129603	-0.180274	-0.158625	-0.150168	-0.151918	-0.119852	-0.134166	-0.160847	-0.14166	-0.165116	-0.164043	-0.15555	-0.0882551	-0.145022	-0.160221	-0.135625	-0.123088	-0.121522	-0.132515	-0.163838	-0.133433	-0.122343	-0.148755	-0.118767	-0.139984	-0.131511	-0.161737	-0.166735	-0.149476
Chemokine signaling pathway	0.124285	0.0893953	0.124732	0.138035	0.134878	0.111599	0.116	0.110131	0.103415	0.200401	0.0981941	0.144078	0.104317	0.0980177	0.129816	0.0872903	0.130939	0.130853	0.092551	0.109782	0.0777657	0.0975751	0.0918021	0.106604	0.0844942	0.162711	0.12172	0.0977549	0.0750643	0.0966763	0.123897	0.110732	0.123416	0.10519	0.12575	0.142265	0.134526	0.126601	0.129843	0.142703	0.113947	0.180567	0.112775	0.129601	0.107774	0.105951	0.102003	0.0973658	0.143961
Cholesterol metabolism	0.0741965	0.145789	0.0754962	0.0962587	0.0981433	0.0931296	0.116248	0.081379	0.121248	0.191344	0.106717	0.138095	0.166321	0.140274	0.131027	0.0972369	0.140681	0.151382	0.126025	0.117274	0.128467	0.0807914	0.117614	0.122236	0.129178	0.12534	0.105096	0.0817723	0.115455	0.113749	0.11388	0.114826	0.120728	0.11749	0.123893	0.1263	0.136171	0.113367	0.15091	0.122561	0.134582	0.148217	0.0931358	0.117991	0.136572	0.10663	0.097582	0.137399	0.100312
Choline metabolism in cancer	0.214176	0.188128	0.21419	0.209023	0.206611	0.193502	0.211318	0.204809	0.188316	0.167315	0.185611	0.15197	0.181019	0.177635	0.171759	0.192695	0.194277	0.192015	0.177646	0.204886	0.160238	0.179844	0.186029	0.192729	0.188355	0.211741	0.216185	0.197774	0.172017	0.192463	0.205665	0.218289	0.181576	0.204726	0.205688	0.218005	0.192361	0.174693	0.201173	0.221098	0.182229	0.187556	0.209831	0.202595	0.211074	0.207486	0.194794	0.19126	0.220423
Cholinergic synapse	0.218848	0.133168	0.215757	0.211391	0.201973	0.115811	0.192711	0.0868082	0.0981778	0.0574505	0.0818084	0.0410778	0.0727169	0.0777465	0.0690406	0.10781	0.0655462	0.0637587	0.0921858	0.123083	0.0616114	0.0963891	0.0844287	0.104032	0.0880234	0.138744	0.142185	0.104656	0.0733692	0.135375	0.108197	0.193424	0.100453	0.139998	0.130723	0.153611	0.0976955	0.0843119	0.0957573	0.176966	0.0993758	0.118809	0.142061	0.106878	0.177437	0.17715	0.125452	0.113705	0.152997
Chronic myeloid leukemia	0.213881	0.236826	0.219696	0.248152	0.225333	0.294849	0.235512	0.303043	0.292473	0.276825	0.314151	0.258117	0.296124	0.279181	0.274855	0.294591	0.296484	0.298994	0.286209	0.282683	0.264128	0.304788	0.301085	0.313989	0.28706	0.298263	0.291657	0.284947	0.283495	0.287612	0.313634	0.273539	0.274356	0.277439	0.287206	0.288066	0.288376	0.271177	0.281557	0.285646	0.270231	0.308447	0.264017	0.302209	0.248684	0.244444	0.274879	0.274392	0.296316
Circadian entrainment	0.264384	0.166435	0.266015	0.258763	0.245597	0.134474	0.237207	0.108464	0.110481	0.0564483	0.0987656	0.0496281	0.0759518	0.0872567	0.0829671	0.125233	0.0796021	0.067458	0.113938	0.160631	0.060608	0.116125	0.0883417	0.107621	0.118028	0.170503	0.165467	0.133101	0.0926763	0.172424	0.122657	0.227435	0.151992	0.175011	0.17335	0.193305	0.121113	0.108466	0.124594	0.219649	0.127	0.117652	0.178919	0.128671	0.225841	0.21583	0.166523	0.1487	0.195765
Circadian rhythm	0.274436	0.220994	0.276602	0.256031	0.248774	0.210704	0.264955	0.2225	0.217277	0.174434	0.21066	0.192333	0.196155	0.19783	0.174115	0.171972	0.190111	0.210055	0.148421	0.229034	0.20773	0.166208	0.221803	0.246329	0.232387	0.219463	0.221937	0.217188	0.249506	0.178217	0.18091	0.25676	0.278996	0.232944	0.207284	0.249121	0.204633	0.16253	0.230715	0.257071	0.178331	0.190909	0.255982	0.243022	0.257984	0.231643	0.21793	0.19748	0.254926
Citrate cycle (TCA cycle)	0.372324	0.341755	0.375215	0.360648	0.363352	0.352851	0.388489	0.33429	0.378059	0.348779	0.357498	0.348426	0.35608	0.367354	0.35515	0.339225	0.333895	0.346756	0.335474	0.369462	0.354638	0.352297	0.324984	0.340765	0.37718	0.364958	0.35015	0.345335	0.350633	0.354702	0.347905	0.369989	0.351838	0.359234	0.350461	0.380454	0.341226	0.35777	0.371096	0.355371	0.328273	0.350707	0.359497	0.363	0.380014	0.372775	0.339081	0.334381	0.353991
Cocaine addiction	0.233824	0.200746	0.237577	0.255939	0.237594	0.109954	0.201362	0.104702	0.106011	0.0649043	0.0828564	0.0614725	0.080392	0.0841178	0.0921117	0.153145	0.112255	0.0762528	0.117563	0.131595	0.0691517	0.1212	0.0795621	0.1185	0.131152	0.138927	0.165984	0.132426	0.107298	0.165742	0.0977984	0.209363	0.130937	0.18467	0.140642	0.162993	0.123496	0.120727	0.121127	0.203954	0.113654	0.112037	0.190073	0.142447	0.193826	0.205579	0.148743	0.162409	0.164447
Collecting duct acid secretion	0.230615	0.225747	0.227057	0.239111	0.237523	0.184769	0.224637	0.186971	0.215014	0.224029	0.190631	0.208823	0.203621	0.223347	0.218311	0.203849	0.203461	0.216355	0.20512	0.203978	0.201623	0.217265	0.193082	0.205854	0.220766	0.212585	0.206655	0.200902	0.182364	0.239249	0.208908	0.229478	0.189518	0.206622	0.209112	0.206082	0.232972	0.2299	0.214325	0.230668	0.214115	0.219178	0.209315	0.230093	0.222446	0.222322	0.187537	0.204359	0.199546
Colorectal cancer	0.216093	0.209322	0.221993	0.234882	0.220256	0.279542	0.225474	0.27967	0.267606	0.239328	0.282531	0.239701	0.258776	0.260267	0.247373	0.257452	0.273136	0.269457	0.267936	0.254295	0.242329	0.27165	0.269562	0.269132	0.262665	0.275908	0.271496	0.261469	0.265397	0.250377	0.278658	0.2577	0.256807	0.258473	0.271481	0.270253	0.259159	0.249137	0.255025	0.265966	0.242993	0.258056	0.255761	0.267205	0.237489	0.238363	0.265273	0.261041	0.282438
Complement and coagulation cascades	-0.095194	-0.0775476	-0.0643707	-0.057282	-0.0785484	-0.0730311	-0.0372066	-0.046057	0.00513845	0.136953	0.0212472	0.117266	0.0369763	0.0280309	0.0714086	-0.030289	0.0831784	0.0855378	0.00760949	-0.0234837	0.00729235	-0.049228	-0.00476078	0.0247579	-0.0535387	0.0363926	-0.0529458	-0.0584488	-0.0117592	-0.0579575	0.0383185	-0.0436656	0.0479831	-0.0884547	0.00976787	0.00366631	0.0271522	0.0334726	0.0177152	0.0304592	-0.0142	0.1139	-0.0724731	0.0321582	-0.0730647	-0.107395	-0.0757916	-0.0581644	-0.0506104
Coronavirus disease - COVID-19	0.220344	0.222822	0.233367	0.237408	0.235907	0.2563	0.240329	0.263898	0.284813	0.323952	0.274394	0.309631	0.276885	0.286819	0.292463	0.249802	0.302152	0.298641	0.260324	0.270988	0.274001	0.26811	0.28475	0.280112	0.256187	0.297266	0.259619	0.263609	0.249996	0.241781	0.278423	0.241264	0.280765	0.249039	0.273752	0.280851	0.297022	0.2873	0.277038	0.269239	0.264799	0.311743	0.256951	0.291325	0.250355	0.222323	0.248649	0.232595	0.263954
Cortisol synthesis and secretion	0.118358	0.0671361	0.115741	0.124353	0.110523	0.0865926	0.105184	0.04307	0.04042	0.009015	0.0439638	-0.00410615	0.028558	0.0359774	0.00953591	0.0540378	0.051017	0.0259851	0.0626693	0.0747595	0.0130273	0.0679606	0.0372815	0.0609764	0.0576632	0.0778281	0.0749801	0.06644	0.0381156	0.0692252	0.0642777	0.10001	0.0760029	0.0766183	0.0517942	0.0726795	0.035594	0.00239419	0.0521416	0.115072	0.041602	0.0709196	0.0678803	0.0743431	0.0945171	0.0948994	0.0717049	0.0898198	0.0918983
Cushing syndrome	0.118295	0.091421	0.116832	0.127408	0.115827	0.125305	0.110826	0.092452	0.0980363	0.0577484	0.106668	0.0552602	0.0957089	0.0903164	0.0879204	0.113307	0.0854469	0.0904345	0.0983669	0.102905	0.0803512	0.116845	0.0925838	0.114413	0.100293	0.102709	0.107673	0.107396	0.106848	0.108433	0.107401	0.128988	0.0990143	0.107798	0.100195	0.109316	0.0941534	0.0730288	0.0895694	0.129883	0.0789931	0.0961677	0.100185	0.100388	0.11088	0.116596	0.112579	0.113956	0.129234
Cysteine and methionine metabolism	0.191993	0.213727	0.188462	0.187029	0.192404	0.187258	0.209761	0.199012	0.234753	0.224435	0.218953	0.215915	0.217265	0.230613	0.207242	0.209448	0.20467	0.216315	0.202924	0.21605	0.244242	0.212684	0.217934	0.213046	0.208117	0.202498	0.20073	0.200984	0.221941	0.196685	0.207735	0.190954	0.217709	0.211421	0.197343	0.202392	0.217846	0.212833	0.227622	0.20044	0.220248	0.190166	0.215008	0.209491	0.210023	0.204963	0.203178	0.190618	0.195508
Cytokine-cytokine receptor interaction	-0.170638	-0.172038	-0.16379	-0.134274	-0.14373	-0.148486	-0.160096	-0.128161	-0.111086	0.0324859	-0.11949	-0.00894955	-0.114523	-0.091458	-0.0697692	-0.151097	-0.0668827	-0.04594	-0.122924	-0.1402	-0.111564	-0.125435	-0.112461	-0.11387	-0.142823	-0.0750608	-0.141266	-0.129126	-0.124769	-0.160461	-0.108762	-0.172735	-0.0755452	-0.141264	-0.115343	-0.10671	-0.0809194	-0.0871548	-0.0905862	-0.105964	-0.116184	-0.0185837	-0.136495	-0.0851597	-0.17203	-0.180976	-0.143813	-0.157094	-0.109033
Cytosolic DNA-sensing pathway	0.0131642	0.0314639	0.0223131	0.032827	0.0517184	0.0518727	0.00903517	0.0863143	0.0951272	0.159612	0.0741083	0.142221	0.0712578	0.103196	0.116701	0.043869	0.11535	0.106265	0.0578004	0.0540323	0.0825641	0.0984015	0.0806069	0.0653783	0.0456713	0.106895	0.0346141	0.0657778	0.0465395	0.0498951	0.0713172	0.00393534	0.084293	0.0399513	0.0761916	0.0657575	0.14055	0.120127	0.0969874	0.0695042	0.104846	0.146503	0.0506846	0.0851197	0.027385	0.0224146	0.0541126	0.0488357	0.0625912
D-Arginine and D-ornithine metabolism	-0.369463	-0.236704	-0.365543	-0.358346	-0.361155	-0.314054	-0.341554	-0.456176	-0.440319	-0.360043	-0.376894	-0.162981	-0.396144	-0.355889	-0.29498	-0.395325	-0.28948	-0.372096	-0.328565	-0.436984	-0.335762	-0.359692	-0.43675	-0.4835	-0.392048	-0.408256	-0.471447	-0.434995	-0.351735	-0.298256	-0.413463	-0.362325	0.51375	-0.0572524	-0.417383	-0.0872682	-0.25806	-0.428617	-0.358054	-0.430665	-0.0567258	-0.391814	-0.325698	-0.256948	-0.370224	-0.461091	0.0253642	-0.323065	-0.430197
D-Glutamine and D-glutamate metabolism	0.280266	0.184621	0.280296	0.242362	0.252296	0.0977584	0.274199	0.114849	0.192639	0.144604	0.114659	0.11914	0.170294	0.161649	0.119147	0.100194	0.103808	0.104404	0.0888096	0.206877	0.135142	0.16296	0.140616	0.0970524	0.199647	0.16528	0.142655	0.113206	0.149263	0.168766	0.116676	0.23061	0.162062	0.177949	0.150104	0.184587	0.168026	0.095777	0.163579	0.225011	0.122398	0.201188	0.198385	0.154697	0.275945	0.244451	0.158208	0.133563	0.17537
Diabetic cardiomyopathy	0.306206	0.28175	0.310976	0.302237	0.309294	0.278975	0.300275	0.297867	0.31728	0.331079	0.296775	0.315007	0.299509	0.317408	0.300076	0.284246	0.301176	0.304608	0.297052	0.30917	0.303029	0.283878	0.295505	0.294898	0.298926	0.303228	0.295998	0.298869	0.283645	0.309528	0.313505	0.304644	0.287318	0.289432	0.314416	0.31883	0.299063	0.316984	0.306743	0.287917	0.305936	0.304347	0.294588	0.304072	0.303082	0.30175	0.284712	0.280451	0.28209
Dilated cardiomyopathy	0.122534	0.0675863	0.123764	0.120177	0.112297	0.0391241	0.125968	0.0163465	0.0495893	0.0409428	0.068764	0.0325131	0.0740389	0.0453375	0.0397879	0.0505753	0.0686541	0.0637524	0.0467399	0.0654917	0.0325772	0.0347797	0.0539875	0.0688414	0.0521629	0.0578265	0.0545309	0.0546932	0.0588113	0.0661861	0.0563188	0.117542	0.0837426	0.071239	0.0565522	0.0723072	0.0376555	0.0187227	0.0746104	0.108461	0.0339613	0.0837689	0.0748207	0.0776895	0.0953113	0.0845162	0.0703524	0.0616773	0.0826236
DNA replication	0.0983782	0.170361	0.0999367	0.0924147	0.104799	0.333913	0.128541	0.215746	0.247789	0.221222	0.302604	0.251716	0.303339	0.256347	0.253161	0.311234	0.218701	0.251036	0.30099	0.170571	0.27542	0.325853	0.222262	0.297598	0.206559	0.180839	0.152413	0.186241	0.255575	0.25345	0.249681	0.193627	0.170976	0.174097	0.212577	0.151374	0.219794	0.284455	0.178266	0.131971	0.214105	0.181675	0.175392	0.173573	0.129529	0.178233	0.206956	0.217992	0.151834
Dopaminergic synapse	0.288355	0.227265	0.286223	0.28341	0.277611	0.190911	0.275269	0.172537	0.18259	0.137829	0.152783	0.132136	0.144302	0.153883	0.15419	0.193101	0.155335	0.14396	0.179439	0.217487	0.154464	0.174065	0.161125	0.183522	0.19245	0.220161	0.228722	0.202499	0.153953	0.229487	0.183688	0.267563	0.199179	0.232887	0.217489	0.236619	0.185097	0.190209	0.182335	0.255028	0.189077	0.184159	0.237863	0.201177	0.261759	0.258557	0.218605	0.209226	0.236923
Drug metabolism - cytochrome P450	-0.157588	-0.178022	-0.162475	-0.174981	-0.162059	-0.192558	-0.163646	-0.181824	-0.15799	-0.116863	-0.16889	-0.108158	-0.146423	-0.143076	-0.136736	-0.168851	-0.129551	-0.156403	-0.178847	-0.153088	-0.163932	-0.203039	-0.167919	-0.154651	-0.172008	-0.13668	-0.13848	-0.187178	-0.157685	-0.17924	-0.187131	-0.170601	-0.0917828	-0.168719	-0.17583	-0.153597	-0.123075	-0.129201	-0.123002	-0.176366	-0.148041	-0.142003	-0.171717	-0.142852	-0.153862	-0.151143	-0.183926	-0.183778	-0.162618
Drug metabolism - other enzymes	-0.00313418	-0.0145561	-0.00421415	-0.013014	0.00185886	0.0173532	-0.0173539	0.0141475	0.0474616	0.0799642	0.0396741	0.0868342	0.0323468	0.0602629	0.0585653	0.0385164	0.0571257	0.0465983	0.0386183	0.00978864	0.0584704	0.0353165	0.0221081	0.0294434	0.00603501	0.0260711	0.00748799	0.00019883	0.0261335	0.0346106	0.018011	0.00532807	0.0268246	-0.00535942	0.00627959	0.00109225	0.0486178	0.0663213	0.0257078	-0.00862324	0.0343653	0.0390954	-0.00103316	0.0273053	-0.00233975	0.017774	0.00387296	-0.00550798	-0.0269833
ECM-receptor interaction	-0.00389622	0.00243901	-0.000774807	0.0322747	-0.0120346	-0.0121645	0.0163761	-0.0109578	0.103802	0.12474	0.142637	0.0886132	0.144797	0.104415	0.0782216	0.0890556	0.145593	0.138349	0.112472	0.0378731	0.0784147	0.0153625	0.130632	0.111315	0.0347936	0.0275904	-0.0145086	0.0217284	0.129569	0.0664714	0.0849064	0.0801866	0.0450747	-0.0109523	0.0638608	0.0576103	0.0437327	0.0299965	0.0780483	0.0624141	-0.0122237	0.175825	-0.00715944	0.0661539	0.0056238	-0.0278451	-0.0210294	-0.0114571	0.0103853
EGFR tyrosine kinase inhibitor resistance	0.223042	0.200977	0.222221	0.231538	0.216207	0.218301	0.223102	0.218479	0.214348	0.194815	0.232575	0.181392	0.211332	0.203245	0.184936	0.198508	0.229328	0.220789	0.209566	0.210308	0.19121	0.201286	0.235665	0.226683	0.211139	0.229182	0.239801	0.200082	0.221424	0.208504	0.228846	0.24067	0.214573	0.22931	0.219198	0.243284	0.203065	0.181092	0.234375	0.235617	0.199219	0.240727	0.210823	0.236116	0.226326	0.210903	0.203578	0.219899	0.246561
Endocrine and other factor-regulated calcium reabsorption	0.295556	0.231495	0.294708	0.28916	0.283582	0.192276	0.271925	0.171046	0.163394	0.128593	0.165181	0.109887	0.149651	0.140589	0.161195	0.172449	0.162693	0.134952	0.173397	0.210975	0.111227	0.180896	0.142331	0.15725	0.171305	0.210391	0.223093	0.178853	0.149195	0.221685	0.187274	0.266698	0.165103	0.224685	0.213808	0.219257	0.180691	0.157952	0.179117	0.260537	0.169883	0.168968	0.237054	0.186337	0.263408	0.262202	0.205753	0.207297	0.222997
Endocrine resistance	0.196053	0.176222	0.18958	0.204494	0.194621	0.244606	0.203263	0.220941	0.224482	0.18489	0.248398	0.163987	0.217219	0.208006	0.19639	0.252468	0.226759	0.215771	0.220707	0.228573	0.186096	0.227705	0.247502	0.251882	0.226508	0.227333	0.227012	0.228051	0.214884	0.239289	0.25783	0.231239	0.194454	0.223918	0.225957	0.229963	0.206134	0.193892	0.211728	0.230569	0.19522	0.217507	0.217211	0.236132	0.207373	0.211486	0.223326	0.220743	0.243604
Endocytosis	0.280819	0.281761	0.280881	0.286231	0.277906	0.263927	0.28046	0.260308	0.256078	0.258858	0.245046	0.237048	0.256141	0.240682	0.249641	0.243169	0.257416	0.251202	0.246811	0.26412	0.229291	0.25313	0.251884	0.25536	0.261697	0.275385	0.281741	0.265885	0.235656	0.268354	0.262565	0.278829	0.254936	0.273038	0.274185	0.282913	0.261775	0.252561	0.262874	0.277678	0.253581	0.272004	0.267707	0.271972	0.278895	0.270885	0.265764	0.267502	0.279235
Endometrial cancer	0.229165	0.220724	0.233609	0.246597	0.233723	0.292559	0.241096	0.290988	0.276256	0.226445	0.28887	0.233756	0.269681	0.262586	0.250628	0.269534	0.273652	0.265905	0.260196	0.276592	0.239879	0.285432	0.278101	0.27727	0.29207	0.284255	0.289854	0.294096	0.277303	0.267888	0.284032	0.275537	0.276327	0.289928	0.279962	0.284858	0.267057	0.242239	0.269235	0.282838	0.25307	0.261891	0.287761	0.298549	0.256818	0.266105	0.290505	0.281072	0.302935
Epithelial cell signaling in Helicobacter pylori infection	0.236889	0.220999	0.233313	0.260542	0.255606	0.219647	0.241712	0.225235	0.240715	0.291607	0.237425	0.28072	0.231793	0.238139	0.261741	0.245387	0.247738	0.284103	0.216547	0.23534	0.231856	0.225154	0.232468	0.243165	0.236465	0.256925	0.235425	0.250586	0.208102	0.241845	0.243326	0.24629	0.236447	0.240473	0.242239	0.24202	0.243743	0.237318	0.238856	0.256734	0.224833	0.253882	0.267134	0.259245	0.242776	0.232768	0.218195	0.228056	0.265345
Epstein-Barr virus infection	0.131592	0.153025	0.147613	0.157425	0.146786	0.187499	0.158654	0.202258	0.238383	0.263499	0.228578	0.24081	0.22456	0.235872	0.239035	0.197312	0.233093	0.243423	0.212404	0.190386	0.213503	0.233883	0.235471	0.222132	0.188185	0.230387	0.174332	0.189231	0.202222	0.179602	0.218861	0.169511	0.197718	0.157225	0.211091	0.197709	0.244901	0.22951	0.21991	0.195666	0.190905	0.26465	0.152707	0.227867	0.158499	0.136076	0.16562	0.163204	0.185887
ErbB signaling pathway	0.255137	0.225233	0.252326	0.262402	0.250701	0.226492	0.252057	0.227203	0.204196	0.167108	0.21413	0.158493	0.200689	0.187781	0.188373	0.212212	0.206313	0.202163	0.205901	0.216084	0.182935	0.210864	0.213596	0.205863	0.220196	0.235645	0.252724	0.236588	0.202432	0.255189	0.218841	0.260147	0.212871	0.258075	0.237517	0.253891	0.20814	0.198015	0.213289	0.261273	0.184772	0.218439	0.255067	0.234614	0.253165	0.241497	0.237145	0.237996	0.264643
Estrogen signaling pathway	0.14683	0.123915	0.151068	0.150982	0.147213	0.133266	0.146052	0.115656	0.122338	0.102203	0.121343	0.0860794	0.120796	0.112139	0.110949	0.122481	0.124941	0.113033	0.122561	0.132378	0.100536	0.118182	0.118838	0.13974	0.137069	0.152768	0.143034	0.157207	0.112542	0.141054	0.134534	0.157567	0.137174	0.140054	0.138148	0.150521	0.112587	0.114109	0.130423	0.147667	0.112082	0.129347	0.149178	0.145724	0.143651	0.137958	0.131929	0.136994	0.15498
Ether lipid metabolism	0.0557899	0.132368	0.0452427	0.0653183	0.077355	0.0286694	0.0633917	0.0268669	0.042309	0.101171	0.0168526	0.0749731	0.0583679	0.0684337	0.0594018	0.0138102	0.0687088	0.0586423	0.0729216	0.0564794	0.0503352	0.0489201	0.0394599	0.0364326	0.0715596	0.0602851	0.078605	0.0206516	0.0368325	0.054463	0.0706249	0.0486109	0.046762	0.0387849	0.0612435	0.0696529	0.0990857	0.104604	0.113607	0.0412235	0.0952874	0.098721	0.0151851	0.0330228	0.0725525	0.0524045	0.0520418	0.075394	0.0282899
Fanconi anemia pathway	-0.0117427	0.0125272	-0.0160805	-0.0285297	-0.0156523	0.141135	-0.0140255	0.0687907	0.0802441	0.029109	0.101958	0.0505884	0.093514	0.0693545	0.0665149	0.140479	0.0451928	0.070984	0.116972	0.00767546	0.0887969	0.12734	0.0853406	0.109342	0.0391766	0.0138479	0.00366196	0.0470673	0.0802618	0.0635843	0.0683417	0.0278216	0.0151807	0.0110396	0.0306066	-0.0107602	0.0134341	0.0610244	0.02008	0.00497761	0.0221997	0.0142559	0.0177858	0.031967	-0.0066779	0.0246855	0.0362115	0.0432572	0.0211508
Fat digestion and absorption	-0.0742493	-0.0495784	-0.0733329	-0.078918	-0.0684595	-0.0897083	-0.069267	-0.0909778	-0.0431561	-0.000250883	-0.0583411	-0.0230605	-0.0343205	-0.0239688	-0.0332882	-0.0714016	-0.0350574	-0.0206623	-0.0452305	-0.0749763	-0.0200931	-0.072372	-0.0586011	-0.0628601	-0.0612232	-0.0707303	-0.0780561	-0.0564791	-0.0527389	-0.0576237	-0.0852178	-0.0573424	-0.0472289	-0.0757312	-0.0687798	-0.0757443	-0.054178	-0.0563689	-0.0223561	-0.0849286	-0.0414921	-0.0314405	-0.0891461	-0.0816529	-0.0667739	-0.066936	-0.0723653	-0.0631698	-0.0999531
Fatty acid biosynthesis	0.166303	0.128842	0.168995	0.151908	0.148601	0.0748598	0.169371	0.108614	0.124509	0.101162	0.0743816	0.116064	0.0946615	0.140481	0.0799573	0.0726651	0.0732403	0.0678458	0.0621221	0.110708	0.114368	0.0921964	0.0980736	0.0743837	0.140725	0.126828	0.129368	0.114182	0.118062	0.130275	0.0874587	0.144698	0.167699	0.139179	0.0825128	0.134908	0.121122	0.0930943	0.142355	0.136578	0.112876	0.0968416	0.135874	0.147573	0.154001	0.134118	0.124028	0.124334	0.121938
Fatty acid degradation	0.19974	0.216426	0.1975	0.188626	0.189617	0.193769	0.229175	0.175684	0.223202	0.207127	0.187125	0.230808	0.189672	0.222921	0.201977	0.180412	0.195031	0.197796	0.186638	0.221667	0.210281	0.174866	0.186317	0.184015	0.230249	0.223159	0.222259	0.204686	0.220075	0.195913	0.196414	0.210402	0.267915	0.229118	0.189054	0.230741	0.208227	0.199584	0.235447	0.201389	0.214027	0.197818	0.215467	0.219782	0.224481	0.198079	0.199148	0.217956	0.209506
Fatty acid elongation	0.259049	0.288207	0.260133	0.275531	0.261742	0.212325	0.274142	0.168662	0.262583	0.256817	0.240337	0.237702	0.236922	0.247533	0.225003	0.231192	0.198442	0.228185	0.214123	0.220818	0.265901	0.189589	0.210102	0.228921	0.233639	0.236248	0.232301	0.184235	0.215737	0.240054	0.207998	0.256231	0.230812	0.242611	0.218365	0.248009	0.233563	0.262292	0.238656	0.231972	0.22252	0.227193	0.219255	0.212781	0.278796	0.241011	0.18356	0.229117	0.221278
Fatty acid metabolism	0.2536	0.27558	0.256364	0.252792	0.244925	0.230156	0.280094	0.213336	0.260424	0.241074	0.235274	0.252586	0.242789	0.263931	0.240512	0.232723	0.225894	0.23502	0.22174	0.25655	0.255953	0.221103	0.221797	0.231301	0.266674	0.262597	0.254227	0.223862	0.251262	0.249846	0.22883	0.261945	0.287698	0.260825	0.231908	0.269185	0.247866	0.249746	0.267748	0.255824	0.24395	0.239815	0.240648	0.250549	0.276464	0.24908	0.22704	0.249188	0.250402
Fc epsilon RI signaling pathway	0.145767	0.119317	0.150785	0.148331	0.145537	0.149716	0.13663	0.162438	0.141578	0.167729	0.146599	0.144133	0.139351	0.136285	0.148681	0.120961	0.151224	0.155578	0.112041	0.14811	0.107898	0.128579	0.154926	0.146591	0.114313	0.192553	0.165244	0.149018	0.118204	0.127648	0.173476	0.140552	0.148101	0.116381	0.159255	0.179449	0.150237	0.143517	0.158177	0.153816	0.135689	0.204277	0.122131	0.153083	0.132587	0.130546	0.137929	0.137226	0.160429
Fc gamma R-mediated phagocytosis	0.230866	0.243088	0.240431	0.247784	0.237709	0.223987	0.236039	0.233838	0.224151	0.271373	0.231827	0.248286	0.246004	0.223683	0.24936	0.192941	0.247098	0.252919	0.214647	0.242538	0.179159	0.211783	0.219502	0.226269	0.199798	0.286991	0.256898	0.209734	0.210718	0.207428	0.264903	0.240844	0.22776	0.206515	0.262134	0.275544	0.25439	0.235665	0.259458	0.258736	0.230676	0.293832	0.196497	0.23014	0.233194	0.222492	0.206554	0.222489	0.242676
Ferroptosis	0.278073	0.281605	0.289587	0.294868	0.272834	0.276832	0.306037	0.265745	0.318292	0.384116	0.299758	0.387591	0.343356	0.319445	0.338805	0.245709	0.343638	0.366892	0.294521	0.314552	0.296505	0.258964	0.31192	0.329968	0.308622	0.332766	0.298289	0.282999	0.306028	0.282596	0.284687	0.31018	0.348151	0.293387	0.296897	0.327674	0.331345	0.323325	0.338797	0.312244	0.283932	0.321053	0.282847	0.349942	0.304161	0.254084	0.273927	0.278145	0.300399
Fluid shear stress and atherosclerosis	0.190424	0.164636	0.195504	0.211619	0.208454	0.182186	0.19186	0.192733	0.207675	0.253285	0.225079	0.243272	0.216365	0.219861	0.213094	0.192153	0.246482	0.243191	0.192511	0.199058	0.201875	0.175575	0.204854	0.222548	0.190892	0.222348	0.191555	0.193714	0.183836	0.186208	0.212625	0.192989	0.22596	0.196404	0.205264	0.218098	0.219559	0.209013	0.203021	0.207179	0.187328	0.245251	0.196219	0.216074	0.180829	0.183411	0.167759	0.166753	0.207731
Focal adhesion	0.165076	0.142685	0.161807	0.180201	0.155078	0.144675	0.171102	0.155856	0.191634	0.197067	0.21872	0.175585	0.213627	0.187468	0.1749	0.188686	0.221268	0.214457	0.191027	0.174894	0.162792	0.148414	0.209757	0.208984	0.168443	0.175067	0.160725	0.158497	0.196077	0.180921	0.194819	0.196889	0.173207	0.158962	0.185492	0.193991	0.165031	0.146182	0.188451	0.191466	0.132027	0.237918	0.148011	0.195027	0.162345	0.140658	0.142593	0.150241	0.169498
Folate biosynthesis	0.0533601	0.0626078	0.0591245	0.0524451	0.0576806	0.102906	0.0778455	-0.00112256	0.079299	0.113497	0.0676644	0.116444	0.0756047	0.0867069	0.0815681	0.0802496	0.0689115	0.0556658	0.076709	0.0987415	0.104719	0.0984019	0.0670676	0.0540835	0.0887325	0.0725285	0.0711055	0.0465416	0.0600423	0.0759458	0.0719992	0.0797192	0.129086	0.109671	0.0734057	0.0876846	0.114982	0.116492	0.0968042	0.0200811	0.0982515	0.0751388	0.0864514	0.106747	0.0923452	0.0679735	0.100674	0.0922807	0.0682959
FoxO signaling pathway	0.181506	0.168735	0.187933	0.192173	0.181156	0.198735	0.183425	0.209381	0.188682	0.197182	0.198057	0.173871	0.19351	0.184503	0.173702	0.196094	0.200834	0.199089	0.178106	0.191813	0.17242	0.184871	0.19173	0.214356	0.198153	0.195512	0.205739	0.211637	0.180761	0.183796	0.201081	0.199577	0.197952	0.201453	0.191772	0.19851	0.189565	0.182799	0.194399	0.212011	0.166227	0.192699	0.202986	0.21525	0.185185	0.173699	0.191099	0.186974	0.209331
Fructose and mannose metabolism	0.152091	0.171596	0.149941	0.145424	0.147513	0.153027	0.143234	0.154444	0.152438	0.214709	0.175408	0.216433	0.216252	0.194352	0.215544	0.159431	0.185288	0.184517	0.145611	0.196685	0.1927	0.172217	0.14403	0.169828	0.166156	0.169801	0.138299	0.156879	0.149075	0.1527	0.16488	0.155745	0.188586	0.14464	0.148907	0.168503	0.182445	0.146776	0.178311	0.151727	0.202076	0.16362	0.145594	0.143235	0.162624	0.156429	0.155292	0.160313	0.13413
GABAergic synapse	0.291667	0.183357	0.284123	0.284342	0.267684	0.127884	0.267858	0.0749013	0.0955451	0.028628	0.0509112	0.0323047	0.0524279	0.0609798	0.0839671	0.126059	0.0633189	0.0336618	0.0986713	0.167433	0.042651	0.111577	0.0851145	0.104045	0.106906	0.164302	0.174701	0.112454	0.0730233	0.170333	0.111549	0.254325	0.107372	0.187982	0.155546	0.188055	0.131446	0.108361	0.106718	0.238502	0.115338	0.0913502	0.19905	0.127813	0.240254	0.231247	0.166142	0.131472	0.200245
Galactose metabolism	0.0927989	0.0870349	0.0908474	0.0850196	0.0963461	0.106617	0.0898454	0.12429	0.145942	0.212059	0.147906	0.201759	0.186709	0.161883	0.19231	0.131985	0.170213	0.181442	0.133837	0.12188	0.170247	0.103561	0.130808	0.142733	0.109083	0.139174	0.107791	0.105761	0.150054	0.115511	0.152848	0.11716	0.148287	0.111386	0.122538	0.133398	0.143283	0.13538	0.148098	0.112813	0.147004	0.160932	0.090428	0.117523	0.106318	0.115173	0.0942222	0.110025	0.106822
Gap junction	0.241444	0.174636	0.237469	0.22515	0.222995	0.19106	0.230057	0.157051	0.169926	0.143519	0.184424	0.131295	0.178821	0.150763	0.149411	0.157824	0.167418	0.154397	0.17313	0.187608	0.135243	0.160516	0.157701	0.1698	0.164402	0.197125	0.197087	0.144913	0.145705	0.186841	0.180569	0.234591	0.165381	0.193519	0.198209	0.213873	0.166995	0.15197	0.176585	0.223685	0.152866	0.169896	0.184013	0.171463	0.222164	0.208199	0.178002	0.163632	0.216201
Gastric acid secretion	0.22674	0.173606	0.221421	0.217105	0.211569	0.128791	0.216855	0.0907857	0.11818	0.0780523	0.1023	0.0672576	0.105441	0.101162	0.104286	0.111048	0.0930472	0.0845489	0.107996	0.165572	0.0688321	0.0920432	0.105936	0.117086	0.11857	0.168301	0.16953	0.104441	0.0966733	0.146889	0.134162	0.204447	0.14403	0.167612	0.159192	0.179774	0.12595	0.102521	0.152964	0.200253	0.136448	0.121563	0.159351	0.125749	0.210393	0.194962	0.142535	0.136636	0.173616
Gastric cancer	0.0720127	0.071024	0.0715267	0.0870488	0.072666	0.108117	0.0783971	0.112893	0.103387	0.0675261	0.125393	0.0817548	0.105705	0.0976469	0.0964561	0.0906911	0.102795	0.108268	0.0948958	0.0998037	0.0846665	0.109625	0.109514	0.109548	0.109101	0.10734	0.112771	0.104778	0.124649	0.101096	0.114969	0.104227	0.111042	0.0957952	0.103197	0.109971	0.0986099	0.0806252	0.106082	0.108681	0.0937557	0.111973	0.086444	0.104219	0.0872621	0.0835637	0.0972539	0.103956	0.122083
Glioma	0.246077	0.214288	0.245283	0.258629	0.245238	0.238273	0.243682	0.221402	0.239522	0.202765	0.248555	0.178609	0.227697	0.228875	0.186454	0.261826	0.223117	0.222492	0.233731	0.231479	0.211473	0.234655	0.243133	0.26017	0.218795	0.247013	0.245711	0.221516	0.229311	0.250526	0.248753	0.276474	0.210876	0.256686	0.240885	0.257538	0.238679	0.222541	0.238085	0.259342	0.209219	0.244726	0.241533	0.249301	0.243548	0.250982	0.229116	0.227277	0.259686
Glucagon signaling pathway	0.173839	0.152023	0.171662	0.16658	0.161177	0.143677	0.178272	0.151259	0.165782	0.129211	0.153029	0.131013	0.151718	0.15941	0.129359	0.148784	0.143998	0.141812	0.133942	0.167606	0.146028	0.141832	0.158801	0.15585	0.151301	0.167405	0.169278	0.159517	0.148528	0.154415	0.158772	0.185175	0.186719	0.169807	0.158388	0.179017	0.151066	0.132483	0.164724	0.178817	0.143122	0.145505	0.167947	0.169648	0.175156	0.163476	0.158716	0.156829	0.169572
Glutamatergic synapse	0.265686	0.160471	0.262013	0.249834	0.244739	0.137795	0.229047	0.112543	0.0947733	0.0443845	0.0863893	0.0322138	0.0622609	0.0780558	0.0749736	0.122077	0.0736015	0.0530974	0.114332	0.161147	0.0537746	0.12027	0.0913509	0.0996422	0.120131	0.163283	0.174451	0.128561	0.0818361	0.167725	0.127112	0.225159	0.111235	0.176312	0.162129	0.185819	0.114486	0.104641	0.114761	0.217706	0.120376	0.114014	0.177439	0.123811	0.214721	0.211668	0.178695	0.15023	0.194393
Glutathione metabolism	0.178045	0.165644	0.179272	0.171764	0.180429	0.20284	0.179244	0.196622	0.243605	0.285016	0.238908	0.278305	0.232139	0.261984	0.237858	0.224958	0.248222	0.238524	0.218903	0.210459	0.259692	0.200833	0.220841	0.227546	0.187578	0.224203	0.207655	0.17486	0.211444	0.18909	0.200857	0.194573	0.24887	0.185865	0.193003	0.21047	0.247828	0.252721	0.23123	0.175634	0.215618	0.228121	0.171415	0.213399	0.190246	0.204775	0.167183	0.17217	0.177587
Glycerolipid metabolism	0.107704	0.0999092	0.106451	0.0938545	0.100886	0.0859407	0.108884	0.069888	0.0920268	0.08576	0.0785456	0.0726291	0.102067	0.101976	0.104214	0.0911795	0.101956	0.0879555	0.0830392	0.112428	0.0904071	0.0960355	0.0825439	0.0676624	0.104914	0.108332	0.112679	0.117157	0.0868387	0.125199	0.0762126	0.113588	0.103506	0.117042	0.0853386	0.117434	0.0886136	0.0739723	0.107415	0.109243	0.113438	0.0879996	0.124042	0.106363	0.119118	0.107169	0.111962	0.123586	0.118291
Glycerophospholipid metabolism	0.141073	0.141945	0.137504	0.133039	0.142822	0.0812459	0.132906	0.0831219	0.114952	0.11809	0.0800019	0.109223	0.0935877	0.13084	0.12445	0.0933211	0.11338	0.111904	0.0973623	0.124629	0.103132	0.109492	0.0976435	0.0880668	0.117945	0.124261	0.121115	0.101134	0.11041	0.124469	0.094997	0.136793	0.118733	0.119756	0.105276	0.124934	0.126715	0.1048	0.139587	0.126419	0.136804	0.127655	0.126011	0.105683	0.134273	0.123534	0.125724	0.123107	0.109424
Glycine	0.0900449	0.110821	0.0921635	0.100386	0.110637	0.114821	0.14677	0.0795459	0.170078	0.117838	0.165644	0.174353	0.15641	0.183481	0.157606	0.163531	0.130591	0.140704	0.1173	0.153587	0.180674	0.119819	0.1496	0.134192	0.142711	0.135954	0.134572	0.0916435	0.167211	0.114621	0.118397	0.149397	0.200066	0.168611	0.102292	0.164269	0.151903	0.137492	0.165947	0.113422	0.170805	0.091907	0.147683	0.12603	0.146105	0.128635	0.149373	0.147098	0.152893
Glycolysis / Gluconeogenesis	0.154443	0.151089	0.153448	0.140966	0.146098	0.148301	0.158784	0.149572	0.170278	0.193025	0.171604	0.19984	0.195638	0.180754	0.194723	0.159432	0.177413	0.184114	0.153753	0.160295	0.181582	0.14214	0.152694	0.162	0.153689	0.169671	0.151045	0.146527	0.158627	0.150915	0.172159	0.156001	0.176652	0.161125	0.148012	0.17036	0.17454	0.161971	0.17012	0.149686	0.166928	0.165569	0.153271	0.15728	0.162577	0.155654	0.145545	0.149013	0.15024
Glycosaminoglycan biosynthesis - chondroitin sulfate / dermatan sulfate	0.145738	0.133908	0.16207	0.179266	0.15847	0.200927	0.165	0.198446	0.186497	0.248182	0.231759	0.192952	0.229477	0.199006	0.188037	0.204058	0.207212	0.244918	0.238217	0.207358	0.188522	0.189065	0.189044	0.176901	0.189688	0.223361	0.198582	0.238614	0.199683	0.22823	0.203997	0.208696	0.203207	0.223835	0.22018	0.200382	0.186209	0.145743	0.189717	0.221104	0.209089	0.271265	0.198118	0.199514	0.165355	0.192819	0.216518	0.204752	0.208041
Glycosaminoglycan biosynthesis - heparan sulfate / heparin	0.177463	0.105852	0.171549	0.165857	0.158589	0.0791035	0.141136	0.0576753	0.105665	0.0975976	0.13798	0.0455154	0.0829757	0.0923699	0.0574992	0.0811654	0.0774365	0.0965029	0.107784	0.0756712	0.134506	0.0976081	0.108643	0.0636711	0.0349388	0.084119	0.0910877	0.0646603	0.0926912	0.118295	0.080192	0.156454	0.0830757	0.0832703	0.100127	0.0828907	0.0611092	0.0580615	0.0714224	0.125803	0.0696991	0.109826	0.0796792	0.0385094	0.131931	0.141462	0.0546939	0.0661777	0.0900018
Glycosaminoglycan biosynthesis - keratan sulfate	0.159108	0.162577	0.166148	0.19713	0.181029	0.0883541	0.133892	0.0412652	0.162293	0.215027	0.177235	0.177553	0.154577	0.147331	0.188517	0.108827	0.174231	0.18626	0.150607	0.114305	0.125263	0.055913	0.126547	0.0995047	0.0796256	0.165074	0.103061	0.018581	0.163532	0.103509	0.11432	0.171716	0.151476	0.0933186	0.125309	0.138316	0.177062	0.147041	0.18965	0.15772	0.170353	0.206163	0.0896973	0.062253	0.143699	0.127336	0.0765633	0.110048	0.107283
Glycosaminoglycan degradation	0.0625668	0.0792345	0.0588756	0.046784	0.0601659	0.0819013	0.0815572	0.0926109	0.182326	0.237544	0.154809	0.174665	0.181975	0.196191	0.179847	0.169955	0.165596	0.187758	0.130816	0.110633	0.163509	0.166911	0.155524	0.120321	0.147554	0.145577	0.0829085	0.0937102	0.174452	0.137812	0.12878	0.113788	0.130906	0.084664	0.115792	0.148197	0.158736	0.139467	0.145505	0.0975222	0.152614	0.21497	0.0807721	0.117821	0.0971848	0.107268	0.0745243	0.0943382	0.09961
Glycosphingolipid biosynthesis - ganglio series	0.182575	0.101182	0.179377	0.165238	0.177542	0.137327	0.154729	0.0340453	0.130522	0.193219	0.104947	0.150765	0.0904108	0.145518	0.144665	0.114189	0.108649	0.15446	0.135671	0.118761	0.174733	0.12483	0.154389	0.112935	0.140509	0.121723	0.11106	0.115927	0.120383	0.12101	0.160545	0.160885	0.121694	0.121242	0.085397	0.121759	0.0815938	0.158086	0.135267	0.110164	0.133054	0.226741	0.10678	0.124379	0.136323	0.148499	0.0966326	0.125203	0.0952015
Glycosphingolipid biosynthesis - globo and isoglobo series	0.0350329	-0.0221742	0.0371307	0.0202762	0.0276232	0.0385999	0.0227352	-0.00875943	0.0327182	0.131851	0.0379898	0.102131	0.0553645	0.0624713	0.0777811	0.0284308	0.0578758	0.0752977	0.0374515	0.035746	0.0511009	0.00539969	0.0476021	0.0368517	0.0223975	0.0708066	0.00404895	0.015987	0.036804	0.0310975	0.0616098	0.0316719	0.0765118	-0.00164485	0.0283713	0.0860294	0.041173	0.0553581	0.0480781	0.0250989	0.0597636	0.1285	-0.0162957	0.0578476	0.0162624	0.0172822	0.0169955	0.0075063	0.0380667
Glycosphingolipid biosynthesis - lacto and neolacto series	-0.00336897	-0.0366892	0.00095131	-0.00325273	-0.00207364	-0.0247709	-0.0229169	-0.0560319	-0.0382363	-0.0308298	-0.0294957	-0.0265023	-0.0358648	-0.0261317	-0.0177074	-0.0504335	-0.0496906	-0.0115361	-0.0462899	-0.0314169	-0.0181676	-0.0810888	-0.0399204	-0.0511344	-0.0574606	-0.0236523	-0.0509623	-0.0642968	-0.00960254	-0.0418059	-0.039675	-0.0186394	-0.0211244	-0.043941	-0.0363065	0.000126394	-0.0440497	-0.0363383	-0.0179732	-0.006124	0.00164232	-0.00594226	-0.0400306	-0.058096	-0.00524464	-0.0219954	-0.0620816	-0.0368416	-0.00505796
Glycosylphosphatidylinositol (GPI)-anchor biosynthesis	0.115203	0.162943	0.110807	0.106329	0.109412	0.146105	0.123643	0.121233	0.168293	0.159136	0.150778	0.159509	0.137222	0.163926	0.173451	0.146604	0.144355	0.156133	0.1236	0.155908	0.189233	0.169528	0.158193	0.124839	0.157007	0.140013	0.115557	0.142841	0.159153	0.133078	0.121106	0.131523	0.143043	0.131033	0.130988	0.116663	0.130464	0.15785	0.124881	0.128415	0.153859	0.12675	0.134655	0.103897	0.12827	0.117394	0.130631	0.1522	0.107109
Glyoxylate and dicarboxylate metabolism	0.202422	0.248894	0.195729	0.186645	0.203411	0.231433	0.241685	0.227087	0.262903	0.226905	0.210847	0.257048	0.229473	0.258488	0.230382	0.24459	0.215876	0.213696	0.230045	0.250462	0.275148	0.251836	0.209019	0.22263	0.280816	0.237434	0.218717	0.251941	0.226001	0.238805	0.237461	0.208385	0.225881	0.250478	0.225008	0.237491	0.224327	0.243396	0.251467	0.206576	0.26703	0.209275	0.232632	0.232016	0.252838	0.253184	0.249179	0.264193	0.223322
GnRH secretion	0.217132	0.117584	0.216678	0.215125	0.194846	0.133598	0.197066	0.0904047	0.0668464	0.0302075	0.052159	0.00483687	0.0621205	0.0476151	0.0600662	0.0682071	0.0633488	0.0429064	0.0685161	0.12909	0.0296939	0.101459	0.0640255	0.0631762	0.0986253	0.136767	0.143924	0.106026	0.0496579	0.132223	0.0812419	0.1782	0.0817625	0.150202	0.129782	0.147609	0.0887904	0.0543998	0.0884829	0.169789	0.104286	0.0853434	0.157631	0.120123	0.184624	0.185834	0.13721	0.133392	0.153636
GnRH signaling pathway	0.214787	0.163105	0.212947	0.213193	0.207608	0.164328	0.201677	0.148065	0.161055	0.140302	0.158479	0.11618	0.144078	0.14948	0.135248	0.161395	0.14689	0.147389	0.142489	0.174479	0.125935	0.137043	0.164161	0.152141	0.149496	0.185632	0.183419	0.16935	0.142425	0.165769	0.165626	0.21044	0.161377	0.170367	0.175045	0.190294	0.150789	0.127509	0.174142	0.203446	0.142872	0.165754	0.186488	0.166067	0.198483	0.196132	0.171605	0.158891	0.192465
Graft-versus-host disease	-0.0206012	0.00696421	0.00155071	0.00588751	0.0234271	0.0532573	0.0373257	0.0784266	0.113198	0.235501	0.0627358	0.195024	0.117686	0.109962	0.157132	-0.00613149	0.164217	0.154988	0.0880689	0.058193	0.0706446	0.0938227	0.122126	0.0858944	0.0401394	0.185261	0.0443203	0.0873165	0.0799806	0.0182266	0.110806	-0.00328074	0.151166	-0.0529072	0.141456	0.12492	0.137731	0.161522	0.127966	0.131772	0.0607991	0.24064	-0.044659	0.119718	-0.0239345	-0.0562259	-0.0144938	-0.0489846	0.0644982
Growth hormone synthesis	0.205824	0.156317	0.206408	0.208035	0.193349	0.161008	0.190836	0.154585	0.15252	0.123184	0.153649	0.101132	0.134762	0.135491	0.118426	0.153066	0.14245	0.1372	0.148628	0.15914	0.120973	0.144967	0.157616	0.155517	0.14377	0.175002	0.174884	0.162829	0.142542	0.165706	0.158647	0.20029	0.155723	0.177559	0.16868	0.175417	0.133543	0.116205	0.152832	0.197511	0.128224	0.164648	0.177294	0.174634	0.18324	0.179954	0.161069	0.159715	0.192292
Hedgehog signaling pathway	0.150835	0.139487	0.146872	0.150367	0.13798	0.149721	0.153729	0.140122	0.122961	0.0676697	0.150197	0.0790281	0.134315	0.104724	0.112228	0.11409	0.12717	0.133159	0.122878	0.12986	0.0838948	0.139351	0.144948	0.121362	0.123942	0.146439	0.162309	0.159801	0.150554	0.137166	0.148805	0.171877	0.139231	0.160629	0.138128	0.144482	0.119434	0.10772	0.14363	0.151839	0.114047	0.145733	0.135588	0.147533	0.159471	0.141147	0.161429	0.167777	0.184917
Hematopoietic cell lineage	-0.0984172	-0.0667498	-0.0878232	-0.0644047	-0.0688062	-0.0473819	-0.0603921	-0.0350176	-0.0168976	0.154049	-0.0254233	0.101136	0.0227604	0.00192351	0.0532736	-0.0876626	0.0581885	0.0377252	-0.0451724	-0.0305586	-0.0509997	-0.0370525	-0.00127238	-0.00454574	-0.0532832	0.0431527	-0.0328627	-0.0396628	-0.0305341	-0.0766884	0.00336528	-0.0851266	0.0199052	-0.0980063	0.0130296	0.0207787	0.0256193	0.025584	0.0247075	-0.0029264	-0.00589567	0.0983927	-0.0976991	0.0235582	-0.0910772	-0.119477	-0.0780139	-0.0962807	-0.0353415
Hepatitis B	0.151615	0.144945	0.160784	0.176006	0.15742	0.179932	0.162017	0.173218	0.204876	0.213614	0.210906	0.184185	0.194002	0.187002	0.187544	0.169433	0.205593	0.210653	0.177871	0.157526	0.17692	0.188403	0.202919	0.195568	0.161676	0.197761	0.175327	0.169338	0.17482	0.177038	0.194143	0.179205	0.188794	0.166617	0.181789	0.176307	0.188271	0.177059	0.179783	0.194399	0.147992	0.222531	0.169552	0.188504	0.164702	0.147326	0.161848	0.162157	0.19165
Hepatitis C	0.10934	0.123382	0.126201	0.126414	0.116533	0.148353	0.127767	0.142026	0.189394	0.178316	0.180838	0.162506	0.174815	0.181939	0.158883	0.143672	0.172197	0.178108	0.146439	0.14765	0.163938	0.194585	0.179789	0.173524	0.153191	0.160714	0.141772	0.143255	0.153226	0.141134	0.151339	0.139377	0.150615	0.146225	0.14625	0.144814	0.198765	0.163934	0.167955	0.143859	0.13017	0.185861	0.132865	0.190699	0.141055	0.114114	0.145244	0.144251	0.14872
Hepatocellular carcinoma	0.159212	0.153541	0.162673	0.173489	0.161678	0.201849	0.160456	0.200403	0.192974	0.161223	0.208464	0.16216	0.183056	0.183515	0.175461	0.182608	0.191536	0.187446	0.188829	0.183296	0.175113	0.195907	0.198559	0.197122	0.182998	0.192064	0.204591	0.18529	0.203605	0.194071	0.195267	0.191956	0.186511	0.189761	0.186535	0.194567	0.18689	0.178846	0.182692	0.189382	0.168461	0.192323	0.18169	0.197741	0.172595	0.180505	0.188591	0.184796	0.20124
Herpes simplex virus 1 infection	-0.000325028	0.0302166	0.00481115	-0.000407513	-0.0010797	0.0681474	0.00575021	0.0996578	0.0874029	0.0459859	0.0863613	0.061398	0.0504237	0.0796858	0.0250396	0.0683397	0.0630348	0.0639953	0.0550332	0.0472592	0.076777	0.0573235	0.101102	0.0707792	0.0485789	0.05276	0.0501192	0.0594835	0.0736205	0.0246123	0.0604577	0.0010858	0.0421756	0.0222861	0.0525329	0.030568	0.0513211	0.0461774	0.0404064	0.027662	0.0377827	0.0392381	0.0325724	0.0534662	0.0106328	0.0154236	0.0386606	0.0253544	0.0479254
HIF-1 signaling pathway	0.219813	0.197475	0.231724	0.238679	0.223424	0.205871	0.224327	0.205691	0.231001	0.230771	0.238511	0.217436	0.24155	0.233482	0.213985	0.22159	0.228999	0.249687	0.205785	0.224705	0.22848	0.178185	0.230641	0.248506	0.206217	0.237115	0.227255	0.195712	0.20597	0.212487	0.234237	0.238586	0.236512	0.229481	0.223157	0.2436	0.216541	0.20602	0.231733	0.244925	0.203366	0.235586	0.226554	0.246044	0.222719	0.212751	0.208985	0.206369	0.236273
Hippo signaling pathway	0.126958	0.131737	0.130905	0.151946	0.126313	0.156131	0.146429	0.161094	0.148003	0.115372	0.177335	0.135508	0.16047	0.153761	0.154214	0.123346	0.159415	0.163915	0.148654	0.14617	0.140126	0.150069	0.158694	0.15014	0.163151	0.167197	0.169889	0.163162	0.169529	0.15591	0.160317	0.160566	0.169206	0.159786	0.169266	0.171389	0.164847	0.134645	0.163559	0.17626	0.142082	0.147192	0.150618	0.159355	0.159325	0.137952	0.165751	0.157157	0.181937
Hippo signaling pathway - multiple species	0.0375267	0.0527903	0.0430779	0.0676951	0.0275017	0.0762075	0.0858357	0.103462	0.134702	0.120855	0.177224	0.0947893	0.138048	0.164236	0.121975	0.104713	0.134896	0.148981	0.100124	0.108126	0.112363	0.0598392	0.166807	0.144786	0.106146	0.121028	0.10488	0.0938464	0.134718	0.067546	0.112236	0.120059	0.165555	0.103851	0.114535	0.130927	0.129695	0.0875074	0.132729	0.126341	0.0832934	0.148898	0.074332	0.0935286	0.101733	0.0440042	0.0521735	0.078324	0.130677
Histidine metabolism	0.0988955	0.156727	0.0807885	0.103375	0.11458	0.058805	0.153483	-0.029568	0.0414074	0.125288	0.031686	0.113608	0.122917	0.0712375	0.0927702	0.0158345	0.099593	0.077182	0.0853155	0.0920793	0.0216649	0.0687994	0.0502283	0.0556057	0.135218	0.0939601	0.130017	0.0410384	0.0784812	0.0860847	0.0425596	0.0926459	0.118567	0.102765	0.0700466	0.120521	0.131337	0.0836085	0.175337	0.050027	0.154884	0.0753728	0.0608928	0.0867839	0.1582	0.0984078	0.0745179	0.141717	0.0706189
Homologous recombination	-0.00871109	0.0219531	-0.0113613	-0.0199072	-0.009112	0.154603	0.00659228	0.100336	0.101593	0.0752092	0.136438	0.09804	0.129033	0.100851	0.0913253	0.145348	0.0806701	0.105137	0.113112	0.0571017	0.1054	0.158522	0.0928752	0.125995	0.0745811	0.0536296	0.031791	0.0763121	0.102692	0.0830144	0.0790486	0.0445474	0.0505331	0.037315	0.0513796	0.0254367	0.0468448	0.087242	0.0540088	0.0224222	0.0612676	0.0476848	0.0489338	0.0611031	0.0128929	0.0310248	0.0671652	0.0551433	0.0423275
Human cytomegalovirus infection	0.178713	0.163542	0.180066	0.197558	0.189832	0.203177	0.180839	0.197781	0.19363	0.220702	0.202534	0.198262	0.197133	0.190362	0.197583	0.189858	0.215005	0.210623	0.192939	0.191033	0.174764	0.200631	0.202972	0.208303	0.180873	0.22829	0.192549	0.195536	0.177492	0.186887	0.209431	0.18929	0.199468	0.191117	0.203258	0.211345	0.210679	0.194646	0.194879	0.218794	0.18933	0.241227	0.192857	0.208319	0.180813	0.180292	0.187587	0.181389	0.219664
Human immunodeficiency virus 1 infection	0.178103	0.167284	0.184835	0.186787	0.179776	0.184756	0.184539	0.184872	0.20062	0.216347	0.201516	0.199985	0.199377	0.199294	0.205799	0.182841	0.191158	0.201372	0.185984	0.18372	0.195994	0.195535	0.196112	0.196719	0.172533	0.209764	0.183629	0.182921	0.182245	0.188429	0.19687	0.196896	0.186884	0.174072	0.195145	0.198143	0.208139	0.196948	0.193429	0.198593	0.180479	0.224814	0.174613	0.199884	0.185595	0.170457	0.16857	0.165488	0.187625
Human papillomavirus infection	0.12382	0.132897	0.124572	0.140593	0.124417	0.152477	0.134541	0.149651	0.184269	0.166478	0.191689	0.152844	0.183951	0.178211	0.159582	0.169797	0.18758	0.184172	0.175121	0.155793	0.16643	0.167273	0.193263	0.182368	0.160991	0.157501	0.145462	0.145497	0.185734	0.161803	0.176805	0.158402	0.150621	0.143467	0.162673	0.160372	0.163109	0.148102	0.163611	0.162189	0.133922	0.192298	0.137944	0.173353	0.142793	0.130917	0.141925	0.148108	0.158172
Human T-cell leukemia virus 1 infection	0.160387	0.172438	0.167995	0.183585	0.171575	0.224547	0.179705	0.210255	0.227246	0.247919	0.230832	0.225209	0.231297	0.22186	0.227731	0.212455	0.235559	0.236289	0.224367	0.196577	0.20629	0.228218	0.226673	0.23765	0.199807	0.236045	0.199451	0.207393	0.210189	0.202275	0.2378	0.190378	0.208546	0.175476	0.220182	0.213426	0.225654	0.2274	0.212683	0.219325	0.192898	0.253573	0.175523	0.224718	0.171182	0.163355	0.185601	0.18028	0.20476
Huntington disease	0.304268	0.290977	0.303006	0.30836	0.305841	0.288296	0.300624	0.292423	0.307195	0.289645	0.284445	0.289775	0.279073	0.29887	0.293141	0.295282	0.282686	0.283341	0.291402	0.300984	0.30347	0.288315	0.288107	0.285897	0.298341	0.287903	0.291849	0.286174	0.282328	0.296681	0.291896	0.300149	0.278857	0.297261	0.298043	0.296031	0.289369	0.305276	0.287738	0.287498	0.298244	0.282097	0.29804	0.292231	0.299888	0.307182	0.289224	0.288269	0.287765
Hypertrophic cardiomyopathy	0.0971319	0.0485028	0.102954	0.105219	0.090809	0.0216018	0.103357	0.0120263	0.0519265	0.0518382	0.0608015	0.0412922	0.0722095	0.0408586	0.0448997	0.0463799	0.0745719	0.0734161	0.036843	0.0505308	0.0384163	0.0289552	0.0536683	0.0695328	0.0414348	0.0441051	0.0358848	0.0430893	0.0556226	0.0544393	0.044828	0.0972463	0.0724314	0.063642	0.0467287	0.0616514	0.0350744	0.025351	0.0547364	0.0960315	0.025213	0.0816141	0.0661182	0.0731175	0.0740854	0.0631647	0.0564367	0.0510804	0.0680877
IL-17 signaling pathway	0.0471244	0.0254073	0.0575897	0.109252	0.0893619	0.0304134	0.0480774	0.0407059	0.0701055	0.189292	0.0871338	0.170224	0.0848185	0.0860155	0.126027	0.0697943	0.134693	0.167763	0.0691794	0.0416771	0.0909641	0.0440018	0.0760919	0.092931	0.0563181	0.0874443	0.0384701	0.085122	0.0311134	0.0624222	0.0921272	0.0327412	0.108939	0.0659884	0.0616807	0.0525078	0.0852934	0.0912178	0.057474	0.0938202	0.0549188	0.118935	0.106434	0.0788222	0.0364063	0.0344066	0.0376768	0.0324461	0.107987
Inflammatory bowel disease	-0.034389	-0.0256021	-0.0124648	-0.0113233	-0.0072212	0.0124617	0.00608699	0.0321439	0.0635596	0.181545	0.0349222	0.133272	0.0777575	0.0678161	0.0936471	-0.0439147	0.112276	0.108953	0.0329476	0.020141	0.018737	0.0249597	0.0749796	0.0514009	-0.0161189	0.131916	0.0294443	0.0352975	0.0442275	-0.0332305	0.075038	-0.0114492	0.112838	-0.0530706	0.0807462	0.0818337	0.0848379	0.0794208	0.0976644	0.0877808	0.0315757	0.174518	-0.0530391	0.0570777	-0.0277627	-0.0620326	-0.0317962	-0.0622357	0.033373
Inflammatory mediator regulation of TRP channels	0.138347	0.0695873	0.133259	0.130483	0.132155	0.0462856	0.113725	0.0435714	0.0307303	0.0423869	0.0403059	0.0255767	0.0280352	0.0422581	0.0267976	0.0352251	0.0360836	0.0327924	0.0220626	0.0774621	0.00965182	0.0375759	0.0340818	0.0405671	0.0414478	0.0827077	0.0715381	0.0608762	0.0186644	0.0603205	0.0436765	0.106605	0.0648602	0.0752436	0.0733231	0.0961705	0.0452331	0.0218643	0.0648881	0.111872	0.0481283	0.0770947	0.079272	0.0644452	0.107641	0.102274	0.0620594	0.0505005	0.0994376
Influenza A	0.0908924	0.102268	0.109486	0.110689	0.107769	0.120734	0.119099	0.132743	0.190543	0.217058	0.165462	0.195269	0.168708	0.188131	0.190732	0.118078	0.191039	0.195457	0.147747	0.142332	0.161471	0.183194	0.192537	0.163388	0.128512	0.185991	0.129243	0.137545	0.1466	0.111363	0.158529	0.114312	0.17114	0.111453	0.156475	0.156234	0.207571	0.184684	0.180143	0.15769	0.121694	0.230575	0.108586	0.184312	0.111785	0.0777594	0.112116	0.101474	0.147434
Inositol phosphate metabolism	0.220419	0.182849	0.219738	0.214258	0.205167	0.160754	0.208681	0.159505	0.1485	0.135042	0.13271	0.10452	0.159771	0.13148	0.124394	0.120386	0.139832	0.135232	0.11829	0.180509	0.0987958	0.142907	0.137229	0.123657	0.163705	0.177622	0.176156	0.165166	0.133692	0.14869	0.145937	0.196285	0.177779	0.173178	0.164093	0.185956	0.137361	0.10259	0.172999	0.200143	0.145226	0.181571	0.171319	0.180488	0.201131	0.189357	0.151426	0.155492	0.180615
Insulin resistance	0.173681	0.164332	0.176309	0.182719	0.172649	0.135328	0.166377	0.153873	0.157256	0.168701	0.153251	0.142867	0.159885	0.159169	0.13578	0.139846	0.171515	0.165384	0.130524	0.163328	0.147883	0.143159	0.154152	0.163769	0.156335	0.162598	0.161596	0.166567	0.143075	0.148403	0.155945	0.169856	0.191981	0.164445	0.148899	0.162951	0.151281	0.133858	0.165186	0.169409	0.147698	0.180061	0.162399	0.18215	0.158219	0.148466	0.139986	0.147321	0.156108
Insulin secretion	0.218296	0.148448	0.215243	0.212103	0.202126	0.104028	0.203611	0.0626173	0.0850524	0.0133633	0.0690939	0.0284515	0.0465246	0.0726071	0.0606399	0.0865898	0.0499724	0.0383832	0.0784483	0.125857	0.0520491	0.0736625	0.0649242	0.0758943	0.0875399	0.12145	0.147584	0.0862717	0.0726136	0.139774	0.0846946	0.191755	0.0941126	0.172822	0.13368	0.15214	0.0973547	0.0730978	0.116441	0.175001	0.0920847	0.0622054	0.167321	0.110064	0.190486	0.182252	0.133847	0.125954	0.148827
Insulin signaling pathway	0.21872	0.190396	0.219869	0.215657	0.210738	0.194112	0.214192	0.202101	0.199197	0.186051	0.207957	0.189282	0.216186	0.202086	0.197459	0.204435	0.215918	0.210055	0.18449	0.21536	0.190049	0.191218	0.200488	0.21157	0.198367	0.206691	0.21102	0.210465	0.200837	0.196223	0.206673	0.221504	0.221238	0.214006	0.19743	0.212726	0.203169	0.183533	0.211097	0.22259	0.186842	0.202017	0.212496	0.215974	0.209737	0.203648	0.199749	0.200931	0.217611
Intestinal immune network for IgA production	-0.116604	-0.0848907	-0.0963554	-0.104499	-0.086277	-0.0397293	-0.0568899	-0.00440293	0.0202002	0.164057	-0.00911575	0.114835	0.0482589	0.0377431	0.0789504	-0.0815491	0.0624712	0.0699954	0.00840717	-0.0331859	-0.0158596	-0.00311376	0.0418035	-0.000988931	-0.05281	0.0843187	-0.0324255	-0.0137335	-0.00082991	-0.065828	0.0282114	-0.0841029	0.0501622	-0.138735	0.0393538	0.0401334	0.0501646	0.06166	0.0418327	0.0332793	-0.0126416	0.144121	-0.146394	0.0297398	-0.115418	-0.135285	-0.110917	-0.136696	-0.065476
JAK-STAT signaling pathway	-0.0181193	-0.0187974	-0.0107939	0.00779293	-0.0105204	0.00270506	-0.00718854	0.0207176	0.0216285	0.0801371	0.0197816	0.0519821	0.0337997	0.0345913	0.0286394	0.0121272	0.0558213	0.0528528	0.0124915	0.0111404	0.0145099	0.0112223	0.0351825	0.0391392	0.00294447	0.0441211	0.0178807	0.0203061	0.0264242	-0.0142868	0.0287072	-0.00501565	0.0356145	0.00940209	0.0233125	0.0266171	0.0341624	0.0127106	0.0448318	0.0366695	0.0044898	0.0744035	0.00195618	0.0517813	-0.0131633	-0.0237369	0.00214316	0.00803961	0.0306288
Kaposi sarcoma-associated herpesvirus infection	0.15457	0.149774	0.162506	0.182935	0.167596	0.177815	0.168359	0.191684	0.200918	0.236213	0.203073	0.2141	0.191623	0.203267	0.210344	0.182931	0.207283	0.219291	0.18254	0.186157	0.186016	0.193425	0.206478	0.200143	0.173264	0.21819	0.18248	0.183146	0.178743	0.173485	0.206072	0.174338	0.187662	0.169169	0.193547	0.196537	0.209507	0.196591	0.190578	0.202089	0.17841	0.237431	0.173783	0.19804	0.171979	0.158519	0.169247	0.167671	0.203555
Legionellosis	0.133675	0.169556	0.149247	0.191687	0.183149	0.173607	0.156517	0.180787	0.200485	0.334121	0.185813	0.295554	0.215726	0.216763	0.259054	0.171152	0.252237	0.272491	0.183255	0.182292	0.220234	0.153682	0.170168	0.226559	0.150747	0.261994	0.192755	0.175072	0.171714	0.135661	0.239789	0.137747	0.250141	0.179301	0.21058	0.221811	0.228814	0.241104	0.221679	0.205038	0.210016	0.275852	0.19102	0.198892	0.154709	0.137065	0.167506	0.163849	0.238893
Leishmaniasis	0.141433	0.160795	0.169961	0.162387	0.172109	0.196761	0.186226	0.214272	0.260856	0.356131	0.236537	0.313751	0.260346	0.259547	0.278946	0.144233	0.283036	0.306003	0.218805	0.205467	0.204642	0.190967	0.255643	0.239601	0.14443	0.30661	0.218441	0.204318	0.216146	0.155292	0.273985	0.172684	0.274327	0.127616	0.255381	0.264639	0.264433	0.269545	0.270313	0.257435	0.213922	0.341981	0.122423	0.234083	0.149721	0.115863	0.156166	0.148044	0.220694
Leukocyte transendothelial migration	0.12572	0.128773	0.129341	0.146335	0.142326	0.138009	0.141601	0.144284	0.166579	0.206537	0.171556	0.182473	0.186961	0.160421	0.170794	0.122488	0.182367	0.195357	0.136985	0.143897	0.121042	0.115016	0.156523	0.168377	0.120796	0.182121	0.161317	0.131788	0.135624	0.133683	0.187049	0.1478	0.152658	0.123907	0.172183	0.183434	0.168198	0.150372	0.178953	0.15169	0.144535	0.197277	0.113439	0.159546	0.13356	0.111478	0.111778	0.128003	0.149527
Linoleic acid metabolism	-0.191273	-0.166054	-0.198576	-0.18966	-0.193106	-0.25602	-0.204024	-0.225416	-0.183485	-0.145391	-0.210622	-0.131684	-0.205506	-0.135097	-0.148025	-0.216727	-0.169741	-0.159451	-0.195857	-0.201805	-0.178822	-0.197706	-0.196858	-0.203103	-0.199509	-0.203938	-0.212213	-0.231293	-0.181928	-0.213617	-0.214461	-0.191971	-0.136851	-0.227343	-0.209109	-0.197504	-0.180142	-0.179875	-0.149629	-0.208525	-0.194581	-0.128696	-0.231425	-0.214682	-0.193283	-0.19965	-0.196376	-0.19758	-0.214096
Lipoic acid metabolism	-0.121921	-0.043825	-0.123195	-0.131856	-0.115894	-0.109104	-0.10608	-0.053825	-0.0656977	0.00142525	-0.116188	0.0295132	-0.0997353	-0.0831629	-0.0538479	-0.106426	-0.0806183	-0.0784005	-0.112561	-0.0635909	-0.00304197	-0.0713143	-0.0861175	-0.0856773	-0.0129735	-0.104674	-0.082108	0.00058126	-0.0502602	-0.090311	-0.0957842	-0.159681	-0.0509144	-0.0644155	-0.0909868	-0.0980304	-0.0759306	-0.0364688	-0.0591805	-0.181817	-0.0380517	-0.106787	-0.0758381	-0.0690204	-0.0973971	-0.0987747	-0.100121	-0.077618	-0.138634
Long-term depression	0.255506	0.187433	0.253207	0.239425	0.239509	0.18626	0.239905	0.171238	0.147307	0.119279	0.150855	0.0910935	0.134932	0.115548	0.144274	0.139948	0.148813	0.127106	0.167188	0.185862	0.098799	0.183985	0.134808	0.150349	0.168551	0.210044	0.207631	0.18598	0.126579	0.198457	0.181805	0.232774	0.179187	0.207395	0.202118	0.223744	0.155646	0.149911	0.153932	0.232403	0.157623	0.179247	0.218874	0.190208	0.24023	0.216746	0.206246	0.18335	0.228634
Long-term potentiation	0.320018	0.234754	0.317029	0.304071	0.300835	0.202507	0.298561	0.169712	0.183342	0.137656	0.163681	0.120433	0.162008	0.159258	0.147675	0.179396	0.152437	0.152809	0.15927	0.22061	0.139675	0.152425	0.163998	0.171018	0.179738	0.233691	0.241421	0.202102	0.152719	0.217057	0.185686	0.294456	0.208063	0.241635	0.227576	0.258434	0.186867	0.176341	0.195088	0.279487	0.182243	0.195435	0.248849	0.203048	0.286976	0.269871	0.22936	0.204971	0.256791
Longevity regulating pathway	0.208025	0.181434	0.209024	0.207899	0.19701	0.21447	0.205894	0.211131	0.182237	0.162607	0.197506	0.153298	0.179851	0.17536	0.158909	0.175499	0.191527	0.179123	0.175784	0.194356	0.167857	0.19563	0.193007	0.20006	0.194488	0.191494	0.218272	0.216228	0.186752	0.187074	0.192907	0.213399	0.206702	0.207154	0.192468	0.194277	0.166721	0.147746	0.193489	0.204426	0.166665	0.188464	0.204608	0.217853	0.196329	0.198991	0.191947	0.189506	0.2168
Longevity regulating pathway - multiple species	0.218642	0.19318	0.216139	0.210355	0.208066	0.217224	0.212356	0.198075	0.174778	0.170689	0.18818	0.156796	0.182876	0.172647	0.160786	0.182188	0.194646	0.183833	0.167806	0.200424	0.17297	0.173606	0.176462	0.211888	0.188516	0.220624	0.218388	0.200217	0.178813	0.182164	0.206852	0.21206	0.230497	0.20262	0.204966	0.215039	0.173879	0.166261	0.195112	0.208259	0.172561	0.182307	0.204564	0.215982	0.205641	0.195563	0.189008	0.17954	0.227148
Lysine degradation	0.15393	0.179171	0.148874	0.146543	0.142677	0.222345	0.173879	0.195223	0.205698	0.129995	0.213198	0.147471	0.208564	0.192504	0.160133	0.201867	0.183512	0.192411	0.185326	0.19569	0.167414	0.178148	0.210567	0.195921	0.193209	0.18382	0.20149	0.179783	0.228466	0.175154	0.187384	0.192068	0.193759	0.190138	0.177183	0.196281	0.154924	0.140521	0.20188	0.185107	0.16974	0.162705	0.199763	0.18368	0.186782	0.17504	0.203983	0.208204	0.211859
Lysosome	0.225658	0.252911	0.22397	0.217967	0.230412	0.216321	0.231392	0.225717	0.273661	0.335282	0.251618	0.285421	0.289511	0.277305	0.287046	0.244221	0.282073	0.293283	0.24817	0.249717	0.260759	0.254607	0.265057	0.251165	0.253375	0.257785	0.229079	0.23725	0.261439	0.249303	0.257093	0.241516	0.252033	0.219949	0.251885	0.258863	0.272359	0.275872	0.273672	0.246352	0.262044	0.308659	0.215764	0.256523	0.235449	0.217483	0.212873	0.240433	0.221664
Malaria	-0.0226491	-0.042703	-0.0151018	0.0548985	0.0494419	0.00350394	-0.0127139	-0.0384771	0.0458793	0.239728	0.0442782	0.183087	0.081074	0.0835932	0.126639	-0.0112202	0.158091	0.157798	0.0396136	0.0181317	0.042876	-0.0221578	0.0377312	0.0557211	-0.0613531	0.105803	-0.00900822	-0.0427714	-0.00981676	-0.0490637	0.0866489	-0.0222618	0.0982699	-0.00702458	0.0198947	0.0577849	0.0960175	0.0816524	0.0790195	0.0780374	0.0277945	0.198332	0.00824351	0.0223482	-0.0469636	-0.0765365	-0.0569255	-0.0440513	0.0708958
Mannose type O-glycan biosynthesis	0.212913	0.174202	0.210629	0.197507	0.207974	0.187881	0.194652	0.139635	0.173216	0.0873824	0.151269	0.105262	0.14606	0.13143	0.168568	0.154079	0.142761	0.139725	0.17436	0.176541	0.158274	0.151789	0.155446	0.131889	0.129488	0.175974	0.17744	0.141297	0.192438	0.159885	0.153629	0.203721	0.161687	0.18666	0.180745	0.18227	0.155768	0.1426	0.156207	0.204615	0.195102	0.126711	0.169698	0.114281	0.202356	0.208002	0.184974	0.18828	0.219964
MAPK signaling pathway	0.172669	0.150129	0.172934	0.191724	0.17516	0.124755	0.166411	0.126385	0.147385	0.153715	0.153871	0.136808	0.134891	0.140401	0.126879	0.140506	0.155416	0.157016	0.134172	0.142405	0.130072	0.130673	0.138747	0.155669	0.138816	0.155671	0.143523	0.129903	0.137911	0.144092	0.151452	0.169099	0.14788	0.15189	0.150136	0.159251	0.148391	0.129838	0.15065	0.178702	0.131604	0.174322	0.151613	0.161034	0.157165	0.150319	0.135337	0.145622	0.163179
Maturity onset diabetes of the young	-0.272281	-0.278301	-0.257691	-0.280182	-0.268329	-0.238369	-0.266362	-0.242177	-0.24648	-0.267107	-0.203687	-0.224435	-0.248173	-0.23586	-0.241719	-0.21302	-0.243928	-0.235309	-0.191767	-0.279117	-0.174351	-0.217394	-0.209617	-0.21917	-0.245241	-0.255874	-0.262875	-0.221188	-0.199786	-0.222533	-0.234421	-0.265183	-0.226264	-0.235241	-0.260101	-0.247394	-0.252878	-0.215403	-0.250114	-0.282303	-0.267303	-0.253499	-0.256546	-0.270863	-0.280601	-0.241851	-0.255449	-0.229948	-0.27019
Measles	0.0837484	0.0971668	0.0959979	0.102836	0.0993207	0.127008	0.101393	0.131421	0.169512	0.192497	0.153759	0.17404	0.153448	0.161404	0.16952	0.120069	0.169438	0.173142	0.131879	0.128495	0.154288	0.172254	0.167079	0.161177	0.127647	0.162619	0.121935	0.125369	0.13557	0.115935	0.143275	0.108774	0.144399	0.121175	0.141647	0.139023	0.18465	0.160071	0.146079	0.130962	0.114523	0.190218	0.114934	0.182917	0.115244	0.081142	0.117367	0.118063	0.141038
Melanogenesis	0.14942	0.107766	0.150301	0.146094	0.140303	0.118944	0.139703	0.102252	0.0987122	0.0661797	0.114552	0.0599335	0.0946964	0.0950554	0.0815206	0.0888129	0.0877818	0.0832615	0.0901008	0.112495	0.0783201	0.0950614	0.0969832	0.100152	0.102397	0.118362	0.129007	0.102205	0.114062	0.12153	0.107052	0.15125	0.116439	0.124496	0.114821	0.141282	0.102963	0.0806761	0.113125	0.144347	0.0906772	0.098824	0.128244	0.110564	0.137655	0.146213	0.117485	0.110844	0.142053
Melanoma	0.100814	0.0953037	0.0974503	0.113607	0.100104	0.144276	0.104653	0.144304	0.158423	0.134582	0.173053	0.124815	0.151502	0.143803	0.122964	0.171923	0.152247	0.159111	0.149318	0.131771	0.1317	0.146228	0.155979	0.174244	0.13545	0.14433	0.13194	0.124802	0.140391	0.122079	0.158984	0.140702	0.130904	0.128678	0.135705	0.145049	0.147674	0.137763	0.146005	0.136636	0.131218	0.164161	0.115791	0.15014	0.10771	0.114629	0.116857	0.119599	0.156708
Metabolic pathways	0.149989	0.154457	0.148133	0.144637	0.149816	0.130759	0.153163	0.127072	0.152488	0.165557	0.142866	0.16502	0.149142	0.160523	0.15066	0.134768	0.144723	0.146944	0.135662	0.150362	0.160411	0.141646	0.136333	0.133283	0.149404	0.147971	0.142856	0.129917	0.145198	0.146485	0.137889	0.148119	0.158458	0.143831	0.139978	0.151343	0.152024	0.150771	0.161246	0.137524	0.159287	0.146674	0.13795	0.136665	0.156694	0.151087	0.13528	0.142177	0.133279
Metabolism of xenobiotics by cytochrome P450	-0.114607	-0.130687	-0.121973	-0.116664	-0.112997	-0.155981	-0.131064	-0.153576	-0.117627	-0.0781052	-0.135351	-0.0638609	-0.132133	-0.107426	-0.113051	-0.136438	-0.104533	-0.127608	-0.140297	-0.12379	-0.113099	-0.15725	-0.135149	-0.135383	-0.14062	-0.113356	-0.116411	-0.139928	-0.124405	-0.144198	-0.146624	-0.130655	-0.0714766	-0.131697	-0.138291	-0.119361	-0.0953468	-0.0982944	-0.112141	-0.149955	-0.0991664	-0.11126	-0.139267	-0.106336	-0.123097	-0.114576	-0.140112	-0.144446	-0.140939
MicroRNAs in cancer	0.153444	0.162809	0.155494	0.181586	0.153938	0.22569	0.175275	0.203774	0.200986	0.188952	0.236454	0.167819	0.218582	0.198359	0.18853	0.222885	0.225222	0.223838	0.2195	0.188831	0.182249	0.211188	0.215261	0.239147	0.196359	0.202958	0.201457	0.190674	0.198787	0.202472	0.231269	0.204302	0.170511	0.194039	0.203034	0.205551	0.196019	0.187072	0.20167	0.21872	0.161493	0.217736	0.180819	0.211945	0.183151	0.170724	0.190892	0.187869	0.220113
Mineral absorption	0.163898	0.141941	0.168473	0.159098	0.155072	0.0839684	0.158799	0.061115	0.0871271	0.143512	0.0791777	0.138722	0.112774	0.116085	0.121634	0.0843736	0.122244	0.116981	0.111874	0.123669	0.0883131	0.0733661	0.0746018	0.106013	0.108267	0.125386	0.112907	0.0687233	0.115105	0.097206	0.113535	0.156211	0.160819	0.138019	0.109979	0.127752	0.146084	0.119049	0.140938	0.131182	0.104102	0.0865178	0.134292	0.126743	0.144945	0.119688	0.0883816	0.10083	0.139138
Mismatch repair	0.118975	0.172657	0.118364	0.110234	0.120691	0.29662	0.134608	0.209784	0.240008	0.198927	0.291933	0.246265	0.269131	0.239063	0.243054	0.282198	0.21828	0.245527	0.2661	0.171084	0.254448	0.286558	0.210592	0.276322	0.190053	0.169464	0.148686	0.182604	0.252627	0.22232	0.2176	0.178451	0.178603	0.168641	0.195637	0.162533	0.185985	0.249738	0.173727	0.141359	0.183429	0.163523	0.172568	0.177737	0.14053	0.172683	0.17113	0.19016	0.168296
Mitophagy - animal	0.326352	0.329636	0.328501	0.330206	0.325743	0.34001	0.334179	0.336133	0.312637	0.307256	0.317127	0.31889	0.331686	0.314004	0.331751	0.301218	0.335898	0.332911	0.304172	0.332807	0.323089	0.321961	0.317645	0.329556	0.339654	0.322919	0.334484	0.342423	0.323879	0.321342	0.313776	0.3313	0.331037	0.336025	0.334059	0.331586	0.322316	0.319368	0.318044	0.332689	0.313521	0.311844	0.335701	0.342559	0.332649	0.325574	0.329323	0.328845	0.329538
Morphine addiction	0.255456	0.157418	0.250304	0.252048	0.238148	0.080908	0.224665	0.0333091	0.0375586	0.012914	0.0161103	-0.00352217	0.021198	0.0264745	0.0305808	0.0651459	0.0170474	0.00314564	0.0525248	0.113737	0.00340983	0.0543292	0.0365678	0.0567674	0.0593606	0.123463	0.13246	0.0695499	0.0188236	0.125771	0.0709884	0.206027	0.0592262	0.141025	0.113551	0.141233	0.073271	0.0691586	0.0606645	0.19352	0.078365	0.0579759	0.142065	0.0625213	0.197272	0.194223	0.110205	0.0914926	0.148716
mRNA surveillance pathway	0.219602	0.239609	0.214334	0.223456	0.220031	0.280858	0.224722	0.271087	0.256645	0.210014	0.252553	0.215176	0.254788	0.232865	0.233069	0.259349	0.248009	0.245192	0.254321	0.260377	0.228449	0.258604	0.273087	0.260694	0.256839	0.254964	0.255706	0.242492	0.236795	0.251871	0.261339	0.223555	0.230636	0.249268	0.254545	0.24342	0.235937	0.241074	0.22745	0.246623	0.231487	0.223367	0.257609	0.249819	0.237875	0.243216	0.260802	0.256452	0.25969
mTOR signaling pathway	0.199073	0.178782	0.202985	0.197765	0.191941	0.183844	0.187152	0.190837	0.174225	0.161874	0.179129	0.150053	0.176771	0.170445	0.166175	0.16655	0.178848	0.171858	0.166427	0.185685	0.166221	0.17643	0.1717	0.173976	0.181661	0.186096	0.19481	0.193513	0.179052	0.189658	0.173389	0.192596	0.179456	0.19323	0.181857	0.187968	0.167348	0.158757	0.174981	0.191675	0.175285	0.182246	0.194744	0.191798	0.188618	0.196525	0.183738	0.181362	0.200119
Mucin type O-glycan biosynthesis	0.0467232	0.045866	0.050718	0.0703689	0.0449383	0.00831753	0.0447917	0.000746529	-0.0289867	0.0088735	0.00320568	0.00328993	-0.0173547	-0.00392121	0.0193626	-0.0476932	0.0109137	0.00927076	-0.00868078	0.0216332	-0.0272536	-0.00532508	-0.0402105	-0.0402981	0.0273874	0.0575315	0.0286166	0.00749099	-0.00939655	-0.00465195	-0.0104023	0.043609	0.0521023	0.0294022	0.0436637	0.0419588	0.0207331	-0.0288214	0.0121998	0.0600615	0.0201554	0.0378999	0.0204455	-0.00438434	0.0532151	0.0440749	0.00398563	0.0203761	0.0180765
N-Glycan biosynthesis	0.213205	0.230935	0.215946	0.220591	0.220924	0.217574	0.215577	0.209354	0.247075	0.274015	0.236657	0.242685	0.25038	0.212423	0.241866	0.201402	0.244736	0.24493	0.239035	0.214173	0.222065	0.244248	0.215652	0.221991	0.207934	0.246469	0.211952	0.226437	0.211206	0.224616	0.225917	0.228193	0.205377	0.209713	0.227426	0.214648	0.216926	0.237282	0.219803	0.218837	0.218278	0.25593	0.205923	0.205476	0.215794	0.214474	0.200545	0.217698	0.201854
Natural killer cell mediated cytotoxicity	0.0506168	0.0342919	0.0609159	0.0735133	0.0578889	0.0661437	0.058871	0.0616999	0.0723457	0.123246	0.0607208	0.0878854	0.0666724	0.0671655	0.0903495	0.0459738	0.0799172	0.0905581	0.0646938	0.0703165	0.0535976	0.064329	0.0644735	0.066798	0.0422287	0.116478	0.0778947	0.0592582	0.0529173	0.0623112	0.0824242	0.0626511	0.0669851	0.04718	0.0828465	0.0930574	0.0907257	0.0761644	0.0788649	0.0883473	0.0582433	0.132365	0.0482025	0.0973828	0.0553335	0.0453403	0.0383766	0.0548727	0.0819362
Necroptosis	0.131867	0.130271	0.13824	0.139139	0.140261	0.139373	0.135066	0.133356	0.158898	0.191949	0.142397	0.176294	0.146079	0.159532	0.156335	0.117096	0.158332	0.165363	0.178413	0.146283	0.155483	0.147731	0.153337	0.136059	0.139545	0.163309	0.142011	0.125578	0.137499	0.126118	0.146965	0.135883	0.163271	0.137362	0.150106	0.150165	0.172327	0.161847	0.158969	0.150536	0.146288	0.185048	0.133034	0.157339	0.14081	0.122661	0.130515	0.132273	0.143371
Neomycin	0.0276616	0.0221333	0.0336474	0.0313139	0.0289411	-0.0140497	-0.00302662	0.0426543	0.0276322	0.214187	0.0862056	0.237775	0.208839	0.0458957	0.229717	0.0798096	0.157177	0.170901	0.040154	0.0242918	0.117957	-0.0715221	0.0484052	0.121661	-0.0106639	0.056049	0.0343747	-0.0145342	0.0597331	-0.0263335	0.12601	0.0140009	0.143147	0.0167195	0.0233345	0.0458174	0.0858725	0.0413102	0.0461651	0.0479347	0.0177995	0.110346	0.00283005	0.0560467	0.0180368	0.0380344	0.0241001	-0.00826679	0.0383415
Neuroactive ligand-receptor interaction	-0.0473215	-0.129959	-0.0467559	-0.0566482	-0.056342	-0.166911	-0.084603	-0.193252	-0.173335	-0.178715	-0.18987	-0.198963	-0.188614	-0.179525	-0.176468	-0.174531	-0.18716	-0.199412	-0.183885	-0.13817	-0.188734	-0.181406	-0.200745	-0.180167	-0.18121	-0.130215	-0.1369	-0.177558	-0.194923	-0.1377	-0.164249	-0.0868257	-0.170893	-0.123181	-0.121808	-0.125024	-0.157555	-0.160334	-0.164524	-0.0904437	-0.14926	-0.167033	-0.117296	-0.167338	-0.0991191	-0.0932153	-0.14614	-0.159051	-0.124159
Neurotrophin signaling pathway	0.25696	0.24006	0.255027	0.264194	0.25555	0.241723	0.255004	0.234437	0.235747	0.220143	0.235893	0.208145	0.232826	0.226382	0.222782	0.242868	0.235178	0.235978	0.224295	0.251969	0.218545	0.22413	0.241414	0.241441	0.23606	0.259393	0.262262	0.24539	0.232681	0.243677	0.249132	0.264122	0.23767	0.256411	0.25324	0.254691	0.237224	0.217882	0.239633	0.263872	0.227759	0.258139	0.252702	0.256135	0.255233	0.248626	0.245566	0.249123	0.266103
Neutrophil extracellular trap formation	0.00213779	0.019157	0.00876356	0.0157523	0.0155489	0.0844941	0.00592258	0.0562395	0.0378141	0.124546	0.042365	0.0987544	0.0649676	0.0504012	0.0767236	0.00633269	0.0706486	0.0617106	0.200475	0.0269679	0.0460632	0.0218818	0.0205265	0.0437772	0.00296268	0.0654594	0.0468063	0.0133106	0.0217901	0.010675	0.0721778	0.0107927	0.0427991	0.00723245	0.044141	0.0487646	0.0601309	0.103144	0.0617708	0.038391	0.0476694	0.0829419	0.00188191	0.0524589	0.0104778	0.00294879	0.0116559	0.0320581	0.037148
NF-kappa B signaling pathway	0.0138138	0.0262182	0.0235038	0.0618752	0.0567724	0.056435	0.0261777	0.0740181	0.0837259	0.200777	0.0861698	0.167906	0.0968451	0.0933435	0.1341	0.0408659	0.141787	0.162494	0.0561502	0.0601556	0.0556955	0.0705926	0.0700821	0.0686474	0.0572721	0.134672	0.0536581	0.0685792	0.0436792	0.0364173	0.0948024	0.0265417	0.130199	0.0517893	0.0868588	0.0867019	0.116	0.0894183	0.096016	0.102089	0.0940964	0.196476	0.0670303	0.106696	0.0249338	0.00599381	0.0447981	0.0457286	0.110399
Nicotinate and nicotinamide metabolism	0.0651885	0.0859838	0.0656145	0.0672515	0.077206	0.0649522	0.0822291	0.0925014	0.108984	0.140618	0.0875607	0.128845	0.068636	0.120366	0.128021	0.0705343	0.107113	0.105975	0.0900484	0.0903675	0.127147	0.0799544	0.0853677	0.0716293	0.0742021	0.0783125	0.0790532	0.0718095	0.0939856	0.067062	0.0677275	0.0770458	0.122166	0.0812948	0.103477	0.0972521	0.100694	0.10879	0.109858	0.0797525	0.121317	0.0789831	0.0919812	0.080512	0.0962474	0.086041	0.0968724	0.0930653	0.0941036
Nicotine addiction	0.250609	0.0279797	0.243336	0.215223	0.217375	-0.065332	0.179645	-0.164691	-0.116843	-0.247211	-0.21432	-0.259645	-0.226564	-0.188561	-0.169162	-0.0554814	-0.205258	-0.236508	-0.112702	-0.0340826	-0.199186	-0.101354	-0.1653	-0.145385	-0.130822	-0.00627921	0.0124962	-0.0634503	-0.166169	0.0237347	-0.0960028	0.160031	-0.128018	0.0918738	-0.00526929	0.0263072	-0.0892891	-0.0798523	-0.167124	0.129937	-0.104123	-0.165884	0.0982439	-0.0766522	0.131503	0.127025	0.0531067	-0.00986273	0.0707013
Nitrogen metabolism	0.0119275	0.0345623	0.0112685	0.0236777	0.024516	-0.0391938	0.0287223	-0.0151111	0.0128807	0.0552364	0.111965	0.0947352	0.129859	0.0715349	0.0533279	0.0770968	0.0801804	0.0507691	0.0452839	0.0340604	0.100136	0.0109239	0.032612	0.0758809	0.0335166	-0.0112419	-0.0164855	-0.0287566	0.0600924	0.0104989	0.0618446	0.0254149	-0.0349002	-0.0017916	-0.0284831	0.00348995	0.0601897	0.0941839	0.100389	0.0151055	0.00526199	-0.0280532	-0.0122328	0.0129784	0.0296609	0.032818	0.0104217	-0.00213612	0.00370202
NOD-like receptor signaling pathway	0.070931	0.0686974	0.0797391	0.0881997	0.0843971	0.0883832	0.0849334	0.111608	0.135833	0.194829	0.121939	0.170649	0.119339	0.140898	0.153426	0.0800833	0.146211	0.160844	0.0904727	0.109009	0.107736	0.114269	0.131147	0.11205	0.0955014	0.147712	0.0985411	0.102064	0.0974144	0.0749716	0.122432	0.086378	0.136067	0.0870265	0.124556	0.115504	0.151707	0.112072	0.137886	0.126568	0.113482	0.1767	0.0850594	0.144505	0.0940006	0.0544055	0.0883704	0.0766837	0.118525
Non-alcoholic fatty liver disease	0.286083	0.27621	0.286111	0.295503	0.301789	0.269305	0.281175	0.285249	0.301795	0.328544	0.282244	0.318248	0.284043	0.308863	0.294715	0.278554	0.296326	0.301335	0.279922	0.299639	0.314981	0.278629	0.284343	0.288965	0.291036	0.292977	0.280336	0.290189	0.280671	0.276829	0.2949	0.273066	0.301571	0.293726	0.287997	0.293477	0.293647	0.311177	0.29584	0.274793	0.302781	0.30941	0.296204	0.294222	0.278467	0.283793	0.276118	0.27572	0.285636
Non-homologous end-joining	0.136707	0.151134	0.128947	0.126607	0.117443	0.198146	0.137186	0.195552	0.142937	0.126676	0.159155	0.14038	0.166486	0.125532	0.135557	0.150131	0.132546	0.155193	0.149506	0.146148	0.131438	0.187383	0.141359	0.158696	0.17244	0.161034	0.163125	0.17844	0.132576	0.175501	0.126633	0.118629	0.14143	0.139551	0.134739	0.12933	0.103653	0.132761	0.125777	0.136841	0.13796	0.146349	0.142863	0.158126	0.130704	0.11722	0.159012	0.159073	0.147049
Non-small cell lung cancer	0.209535	0.20391	0.214333	0.223782	0.209578	0.248512	0.211237	0.238298	0.220478	0.214008	0.240824	0.197563	0.218766	0.213015	0.219496	0.238102	0.223957	0.224524	0.22424	0.221804	0.19638	0.246806	0.229126	0.24482	0.227868	0.241359	0.239146	0.225077	0.216102	0.233013	0.242451	0.247956	0.223032	0.23416	0.238837	0.249738	0.235412	0.227524	0.220472	0.239295	0.21632	0.252537	0.234105	0.249966	0.22198	0.217758	0.225914	0.225157	0.24623
Notch signaling pathway	0.174942	0.204787	0.168559	0.176097	0.180447	0.28646	0.212146	0.27418	0.262864	0.209489	0.268003	0.178014	0.230224	0.238292	0.216137	0.254564	0.254552	0.246101	0.257472	0.268731	0.220075	0.22647	0.285933	0.255101	0.252511	0.266126	0.276594	0.234927	0.279111	0.246474	0.298592	0.233307	0.201785	0.26739	0.272716	0.270694	0.259862	0.214485	0.251043	0.265544	0.260233	0.24651	0.252344	0.237716	0.245362	0.248822	0.258328	0.271949	0.280601
Nucleotide excision repair	0.141174	0.18357	0.142794	0.135485	0.149818	0.24649	0.152132	0.236381	0.227282	0.215409	0.243694	0.239115	0.225226	0.21896	0.206372	0.246804	0.194419	0.219542	0.232921	0.195183	0.240484	0.240394	0.219207	0.234997	0.207669	0.190521	0.180734	0.193223	0.216056	0.208834	0.210118	0.169678	0.201695	0.175414	0.20156	0.182094	0.197325	0.234226	0.178104	0.154818	0.207388	0.191599	0.178052	0.186065	0.16307	0.187044	0.184831	0.187882	0.177119
Olfactory transduction	-0.384661	-0.400893	-0.385028	-0.384586	-0.385536	-0.423119	-0.390552	-0.428859	-0.425295	-0.426615	-0.432241	-0.434393	-0.425208	-0.426956	-0.43083	-0.423953	-0.432304	-0.429447	-0.419622	-0.415352	-0.432951	-0.425896	-0.426595	-0.428127	-0.425602	-0.412052	-0.408174	-0.4208	-0.431681	-0.409478	-0.42249	-0.396073	-0.4137	-0.403866	-0.411024	-0.410604	-0.422344	-0.428195	-0.42084	-0.404835	-0.415942	-0.421719	-0.404168	-0.428343	-0.393538	-0.392704	-0.41769	-0.412847	-0.405948
One carbon pool by folate	0.01845	0.0737555	0.0197533	0.0155988	0.0112333	0.188704	0.0713535	0.118315	0.13773	0.118426	0.152472	0.159735	0.146338	0.142239	0.10597	0.125191	0.117455	0.127819	0.115652	0.113298	0.180047	0.169363	0.153756	0.141594	0.145317	0.112797	0.127212	0.132043	0.111171	0.119522	0.134359	0.0987795	0.155549	0.114292	0.122404	0.0729011	0.115795	0.125563	0.152852	0.0765009	0.146913	0.126001	0.0770265	0.1093	0.087042	0.0763286	0.120744	0.12196	0.0885045
Oocyte meiosis	0.173583	0.155335	0.17137	0.163679	0.165671	0.197784	0.170494	0.137736	0.177947	0.13282	0.176747	0.134134	0.181053	0.16246	0.143473	0.198251	0.152275	0.157644	0.172282	0.152955	0.165446	0.170813	0.157556	0.198891	0.152521	0.155864	0.152373	0.155558	0.150926	0.175978	0.178308	0.18221	0.13914	0.154522	0.160275	0.158098	0.155095	0.172433	0.153092	0.168184	0.136129	0.141629	0.154912	0.152378	0.166852	0.166497	0.153152	0.141461	0.166342
Osteoclast differentiation	0.110825	0.108186	0.128695	0.144204	0.13936	0.126932	0.122779	0.147134	0.154912	0.266602	0.147259	0.220373	0.171198	0.158843	0.186361	0.115344	0.194482	0.204334	0.130249	0.145674	0.126673	0.12533	0.155076	0.161439	0.106651	0.202184	0.142975	0.137137	0.122565	0.101142	0.178807	0.11557	0.177517	0.109887	0.169135	0.166164	0.184088	0.16402	0.171242	0.172516	0.149192	0.247503	0.111601	0.174523	0.113482	0.0961492	0.121447	0.129894	0.159449
Other glycan degradation	0.156466	0.193073	0.14215	0.122654	0.157353	0.15493	0.143118	0.206762	0.253627	0.322979	0.197853	0.256442	0.238245	0.253427	0.247136	0.237102	0.260456	0.262957	0.213388	0.208322	0.248702	0.25625	0.254508	0.209717	0.241451	0.19664	0.180765	0.204744	0.258615	0.214079	0.250407	0.161893	0.206062	0.175471	0.209546	0.200093	0.236267	0.239941	0.26275	0.172613	0.241821	0.274756	0.174745	0.224189	0.151041	0.156034	0.176079	0.218694	0.141127
Other types of O-glycan biosynthesis	0.105682	0.135035	0.106344	0.123885	0.108973	0.134843	0.117835	0.13397	0.140776	0.130843	0.15132	0.127869	0.14689	0.146686	0.147659	0.105985	0.147661	0.156984	0.124357	0.136161	0.12254	0.114353	0.123232	0.116171	0.122594	0.17279	0.142182	0.123644	0.146659	0.105626	0.128672	0.141886	0.13161	0.131508	0.160117	0.151055	0.144144	0.102029	0.143956	0.16157	0.154821	0.150013	0.130804	0.106702	0.144262	0.132352	0.121253	0.136824	0.135401
Ovarian steroidogenesis	-0.018478	-0.0390799	-0.0179145	-0.0183177	-0.0305803	-0.0599026	-0.0327651	-0.0944067	-0.09957	-0.029731	-0.0776681	-0.054535	-0.105641	-0.0682338	-0.104653	-0.0841345	-0.0664809	-0.0888114	-0.112879	-0.0408347	-0.106398	-0.0714023	-0.0949215	-0.0807664	-0.0526688	-0.0463098	-0.0526	-0.0726079	-0.0868005	-0.0725223	-0.0537772	-0.0508162	-0.00958714	-0.0477906	-0.0588216	-0.0266568	-0.0744591	-0.0950374	-0.0249275	-0.0257941	-0.0567221	-0.0410818	-0.0528795	-0.0365712	-0.0248972	-0.049516	-0.0552209	-0.0610684	-0.0340663
Oxidative phosphorylation	0.381817	0.374117	0.378516	0.376168	0.39176	0.356106	0.375323	0.371544	0.391446	0.40362	0.358071	0.400545	0.356111	0.404069	0.37942	0.372244	0.355055	0.366698	0.378543	0.384726	0.408714	0.374142	0.361528	0.364213	0.394102	0.3651	0.363575	0.371014	0.35873	0.389355	0.377449	0.368493	0.352021	0.373866	0.375129	0.378255	0.380384	0.41355	0.382369	0.346713	0.401118	0.363254	0.380798	0.368985	0.378158	0.391673	0.362635	0.36044	0.351139
Oxytocin signaling pathway	0.232551	0.145831	0.229421	0.224438	0.218855	0.131487	0.216279	0.117627	0.120758	0.105725	0.113511	0.0831888	0.110447	0.105684	0.0987575	0.1175	0.10772	0.10931	0.112777	0.149435	0.0899307	0.116252	0.105917	0.127675	0.116408	0.159981	0.156987	0.128804	0.0952388	0.146702	0.125096	0.206688	0.143371	0.169268	0.156415	0.176754	0.128954	0.113457	0.131577	0.204106	0.124142	0.131611	0.169699	0.145692	0.201822	0.196448	0.14712	0.140069	0.179422
p53 signaling pathway	0.0754013	0.0938286	0.0870877	0.119801	0.0960162	0.196923	0.104124	0.176249	0.223999	0.226756	0.23383	0.210165	0.209748	0.222532	0.197596	0.255667	0.195312	0.221941	0.244691	0.148867	0.235423	0.250817	0.213309	0.245167	0.187239	0.145575	0.143714	0.197507	0.171462	0.201442	0.216511	0.159412	0.164785	0.157381	0.161302	0.136776	0.197573	0.215802	0.177745	0.148613	0.162442	0.222956	0.167227	0.195573	0.105801	0.115178	0.160322	0.159144	0.16151
Pancreatic cancer	0.194809	0.209456	0.202594	0.219675	0.201319	0.264383	0.211208	0.267881	0.267687	0.254842	0.287781	0.25052	0.278061	0.264201	0.25619	0.263391	0.267497	0.28525	0.262766	0.2508	0.239374	0.26511	0.26802	0.280509	0.251787	0.270103	0.252262	0.249375	0.259789	0.22748	0.280933	0.252271	0.250842	0.238525	0.263415	0.255108	0.264976	0.250441	0.251547	0.25007	0.235449	0.259392	0.232705	0.25737	0.22251	0.215802	0.239416	0.23716	0.257347
Pancreatic secretion	0.0824961	0.0352453	0.0809863	0.0715219	0.0706499	-0.00300252	0.0783726	-0.0245346	-0.0107317	-0.0135921	-0.00477145	-0.0332379	-0.0193682	-0.00889433	-0.0134431	-0.0251826	-0.00860593	-0.0200371	-0.0137072	0.0251123	-0.0412956	-0.0328883	-0.0174977	-0.0141718	-0.0134885	0.0252062	0.0271115	-0.018251	-0.0188534	0.00626554	-0.00653994	0.072715	0.0153058	0.0151353	0.0192054	0.0364931	0.0016746	-0.0201561	0.0213414	0.0567718	-0.00456369	0.0039368	0.0180477	-0.00834509	0.0717221	0.052898	0.00399066	-0.00781659	0.0292085
Pantothenate and CoA biosynthesis	0.0332386	0.0312021	0.0318292	0.00580098	0.0219427	0.0297903	0.0312834	0.0325171	0.0718129	0.122665	0.0627804	0.0891852	0.074758	0.0647925	0.072542	0.0203709	0.0799629	0.0720125	0.0409139	0.0337469	0.0832225	0.043989	0.0483734	0.0422731	0.0199446	0.0479497	0.0190596	0.0264611	0.0731438	0.0196608	0.0438063	0.0210725	0.0672162	-0.00518968	0.0331864	0.0368867	0.0421372	0.0636783	0.0434248	0.0179073	0.0409608	0.0928756	-0.000515471	0.0239336	0.0270255	0.0163901	0.00163768	0.00181248	0.00968988
Parathyroid hormone synthesis	0.178888	0.15193	0.175495	0.192759	0.17586	0.158047	0.183372	0.147908	0.140491	0.131696	0.152342	0.104039	0.131397	0.133253	0.125983	0.142254	0.15972	0.14777	0.151491	0.155764	0.112649	0.144781	0.157362	0.156485	0.153315	0.178934	0.177059	0.159425	0.13389	0.167399	0.166549	0.189092	0.166711	0.172724	0.157275	0.176779	0.141559	0.120218	0.16252	0.200415	0.138676	0.171749	0.173618	0.167516	0.179393	0.172211	0.160761	0.1644	0.187845
Parkinson disease	0.354593	0.342412	0.352603	0.355593	0.359573	0.330142	0.352883	0.328831	0.354268	0.341738	0.331858	0.346537	0.331542	0.357487	0.343549	0.341881	0.328269	0.334161	0.337719	0.349752	0.357739	0.330612	0.332915	0.336594	0.344774	0.340096	0.338701	0.327207	0.327436	0.346736	0.342707	0.348287	0.328341	0.345692	0.350341	0.350701	0.34856	0.366154	0.343376	0.334425	0.351273	0.32749	0.347055	0.334014	0.351489	0.3589	0.33195	0.331017	0.334425
Pathogenic Escherichia coli infection	0.176453	0.1821	0.183258	0.197511	0.189207	0.184487	0.191828	0.190782	0.206617	0.243458	0.199721	0.224252	0.219153	0.199068	0.216142	0.173448	0.220976	0.230912	0.185835	0.199974	0.176182	0.1836	0.20206	0.199793	0.184076	0.220807	0.205304	0.190497	0.183083	0.178799	0.217407	0.189397	0.208802	0.184406	0.208821	0.212687	0.214099	0.198266	0.213833	0.206073	0.184403	0.248687	0.177227	0.204895	0.184901	0.172811	0.175115	0.186469	0.198623
Pathways in cancer	0.106252	0.102921	0.106201	0.120441	0.107944	0.133695	0.118908	0.135878	0.146325	0.146994	0.157646	0.134742	0.146125	0.141329	0.139274	0.127535	0.148304	0.152046	0.134769	0.136861	0.12261	0.130576	0.151062	0.149671	0.128213	0.151477	0.13848	0.125583	0.14243	0.127672	0.158034	0.132418	0.13776	0.126249	0.143829	0.152339	0.140765	0.125499	0.142903	0.144255	0.125906	0.158554	0.119464	0.144249	0.122809	0.115845	0.120326	0.11934	0.146748
Pathways of neurodegeneration - multiple diseases	0.277741	0.252222	0.277526	0.280582	0.278992	0.241371	0.269805	0.242641	0.256334	0.240019	0.239159	0.237873	0.236538	0.248113	0.247476	0.240446	0.239804	0.243331	0.234981	0.256968	0.249207	0.240306	0.238913	0.238778	0.245427	0.25188	0.251991	0.240867	0.236136	0.255743	0.243626	0.268769	0.243434	0.258305	0.260964	0.259711	0.247777	0.250739	0.24307	0.263423	0.249738	0.24398	0.258563	0.24621	0.268421	0.272242	0.247427	0.24533	0.256692
PD-L1 expression and PD-1 checkpoint pathway in cancer	0.143924	0.123107	0.15196	0.1506	0.147194	0.156723	0.148597	0.16795	0.181946	0.203079	0.177354	0.16639	0.164146	0.182329	0.170333	0.147443	0.16792	0.185194	0.141047	0.158888	0.159524	0.159165	0.171127	0.166069	0.141101	0.192883	0.164138	0.161319	0.150356	0.141601	0.16846	0.154829	0.168844	0.149677	0.172815	0.171206	0.174109	0.144694	0.179609	0.177333	0.155235	0.206761	0.149479	0.194602	0.152002	0.135112	0.14276	0.151069	0.175749
Pentose and glucuronate interconversions	-0.158154	-0.161966	-0.155228	-0.153909	-0.160681	-0.15592	-0.15891	-0.160668	-0.135359	-0.126747	-0.122062	-0.125486	-0.114161	-0.131435	-0.1348	-0.148125	-0.127936	-0.139559	-0.134751	-0.131395	-0.130271	-0.140538	-0.130888	-0.137569	-0.146103	-0.134481	-0.133915	-0.135811	-0.12624	-0.135863	-0.129488	-0.152121	-0.143599	-0.163015	-0.143095	-0.137919	-0.128697	-0.112312	-0.133131	-0.158847	-0.131178	-0.134929	-0.152594	-0.153014	-0.15248	-0.151035	-0.161556	-0.159886	-0.141349
Pentose phosphate pathway	0.204642	0.221337	0.209406	0.206486	0.205804	0.217209	0.226336	0.223554	0.236849	0.272852	0.252672	0.291399	0.27429	0.253882	0.256598	0.232645	0.25397	0.254857	0.234152	0.243569	0.246711	0.213687	0.232337	0.231119	0.2222	0.251474	0.222859	0.192948	0.244117	0.223701	0.238875	0.213202	0.256669	0.214443	0.21313	0.240033	0.265307	0.248472	0.251029	0.214768	0.255158	0.229772	0.204016	0.202435	0.228172	0.224913	0.219587	0.215527	0.210658
Peroxisome	0.160947	0.198985	0.168327	0.147469	0.16363	0.165161	0.183025	0.165524	0.213639	0.200948	0.194274	0.239366	0.187809	0.224825	0.214843	0.157733	0.184161	0.20237	0.161356	0.19937	0.235808	0.186224	0.188483	0.155777	0.183994	0.195786	0.166407	0.173189	0.21291	0.165027	0.153568	0.18649	0.227337	0.179082	0.178115	0.1978	0.200184	0.189154	0.216636	0.17227	0.208613	0.169434	0.16441	0.170148	0.189098	0.180526	0.171241	0.180026	0.173255
Pertussis	0.112434	0.115748	0.131536	0.146888	0.140699	0.131304	0.145985	0.142031	0.18409	0.282799	0.182775	0.255511	0.176364	0.205397	0.21627	0.122878	0.216226	0.238002	0.141949	0.153969	0.184871	0.133378	0.16571	0.177466	0.123005	0.208465	0.143395	0.157185	0.139544	0.109313	0.195578	0.127309	0.222175	0.122468	0.172444	0.172308	0.197422	0.186065	0.186399	0.184732	0.168028	0.248147	0.117723	0.177306	0.126456	0.0901343	0.120168	0.125778	0.16093
Phagosome	0.196013	0.212625	0.210067	0.208666	0.203709	0.217741	0.224325	0.217996	0.257242	0.336297	0.232954	0.304667	0.282948	0.259803	0.297165	0.202532	0.280804	0.289441	0.246307	0.233482	0.232001	0.23294	0.259947	0.255296	0.204533	0.284742	0.228435	0.213806	0.233001	0.210081	0.262275	0.223256	0.262864	0.177318	0.262403	0.268827	0.272732	0.285464	0.271511	0.264693	0.235275	0.316898	0.17293	0.258935	0.205674	0.175325	0.18742	0.1914	0.224294
Phenylalanine	0.0536996	0.0404235	0.0592749	0.0690469	0.0797642	0.000580306	0.0576689	0.00947177	0.0311639	0.0572566	-0.0107687	0.0387768	0.0318925	0.00930701	0.0271804	0.00807726	0.0265661	0.026651	0.077609	0.00696495	0.0278486	0.0546231	0.00722289	-0.00109899	-0.000182352	0.0283745	0.0141702	0.0137219	-0.011975	0.0226916	0.00973682	0.0386394	0.0440047	0.0406672	0.0290084	0.04239	0.0892539	0.0757026	0.0306755	0.04697	-0.00977112	0.0924143	0.0484027	0.00694326	0.0470023	0.0509294	-0.00693783	0.0177955	0.0361397
Phenylalanine metabolism	-0.010241	-0.0136367	-0.00314397	-0.00416448	0.0011798	-0.0867261	-0.0169482	-0.0850681	-0.0419024	0.0247337	-0.0391311	0.0502386	0.0205437	0.0105102	0.0111672	-0.0355337	0.0251888	-0.00133601	-0.0173816	-0.0226953	-0.0185573	-0.0295799	-0.0388511	-0.0174144	-0.0360474	-0.0332082	-0.0124579	-0.0483236	-0.029084	-0.00951244	-0.0670979	-0.0252129	0.026025	-0.0336038	-0.0418092	-0.021869	0.024615	0.00175752	0.0111389	-0.0107043	-0.0210755	0.0304816	-0.0238063	0.00945335	-0.0284725	-0.0198244	-0.0736154	-0.0413264	-0.0296662
Phosphatidylinositol signaling system	0.227513	0.176583	0.228206	0.217802	0.212204	0.148726	0.217095	0.150019	0.127163	0.112833	0.119596	0.0897468	0.140953	0.124242	0.111187	0.116361	0.127527	0.113542	0.107928	0.16941	0.09199	0.142263	0.122819	0.115849	0.153753	0.165858	0.173097	0.165029	0.119862	0.158056	0.129551	0.20546	0.165405	0.177371	0.152832	0.180452	0.127619	0.0951263	0.156395	0.197816	0.129791	0.156652	0.184608	0.178093	0.203262	0.188633	0.147093	0.145488	0.178567
Phospholipase D signaling pathway	0.184476	0.158773	0.180066	0.1807	0.17819	0.151123	0.176502	0.150411	0.146389	0.148223	0.152728	0.122343	0.146963	0.13964	0.135888	0.135932	0.164996	0.146871	0.133198	0.169136	0.115131	0.13559	0.159256	0.153547	0.145096	0.175805	0.183094	0.148867	0.136098	0.15248	0.173703	0.174435	0.148	0.157351	0.167621	0.183614	0.146018	0.125315	0.181271	0.180236	0.147131	0.174519	0.153261	0.157211	0.171139	0.160138	0.153713	0.158736	0.183683
Phosphonate and phosphinate metabolism	0.236445	0.259588	0.23573	0.212691	0.220537	0.17872	0.258099	0.101912	0.201218	0.161536	0.148267	0.208943	0.232283	0.17547	0.225066	0.143036	0.156625	0.228725	0.131401	0.224185	0.195308	0.189242	0.13261	0.164268	0.213662	0.206072	0.212802	0.173346	0.223439	0.172512	0.127118	0.257143	0.273967	0.240559	0.148611	0.237196	0.192833	0.150441	0.235838	0.240055	0.203682	0.132187	0.217628	0.189183	0.256769	0.179078	0.214249	0.220935	0.211455
Phototransduction	-0.10489	-0.0996615	-0.105947	-0.103483	-0.0968451	-0.133992	-0.121756	-0.131649	-0.147519	-0.118655	-0.149687	-0.128977	-0.143141	-0.119855	-0.134274	-0.12088	-0.131232	-0.133605	-0.141576	-0.139919	-0.141248	-0.132239	-0.131064	-0.144965	-0.130044	-0.133106	-0.126575	-0.108601	-0.122423	-0.147236	-0.136647	-0.138631	-0.108027	-0.123847	-0.134788	-0.119975	-0.124848	-0.141425	-0.111888	-0.127719	-0.0981008	-0.128439	-0.125136	-0.147827	-0.110406	-0.104297	-0.121985	-0.121797	-0.134479
PI3K-Akt signaling pathway	0.0800113	0.0863015	0.0784645	0.102487	0.0806144	0.095135	0.0887645	0.0971458	0.120312	0.139008	0.130057	0.121442	0.125434	0.114498	0.108361	0.112468	0.143017	0.13656	0.120756	0.10675	0.106098	0.101979	0.132104	0.130379	0.100986	0.114416	0.101167	0.0949723	0.120447	0.10852	0.126332	0.108748	0.108502	0.0948371	0.115133	0.121082	0.107359	0.0992597	0.122319	0.117628	0.0910097	0.163243	0.0902273	0.126224	0.0902908	0.0748414	0.0849077	0.0935641	0.110267
Platelet activation	0.123531	0.0930983	0.131089	0.118122	0.118017	0.121509	0.133422	0.124801	0.144601	0.169371	0.147053	0.138918	0.153317	0.133261	0.132655	0.102239	0.148744	0.14911	0.116379	0.139197	0.08225	0.111411	0.133295	0.138885	0.0972242	0.160385	0.142823	0.115017	0.108885	0.114503	0.159837	0.138677	0.148417	0.100849	0.15217	0.170406	0.115799	0.11608	0.149614	0.141946	0.108948	0.18889	0.0894281	0.138483	0.123065	0.0954102	0.108304	0.114763	0.145179
Platinum drug resistance	0.138796	0.126852	0.136895	0.142661	0.137071	0.190914	0.147868	0.166937	0.186271	0.190338	0.199893	0.202141	0.188394	0.185448	0.192501	0.185959	0.183978	0.186548	0.183774	0.161219	0.191247	0.192458	0.197031	0.199225	0.165714	0.18661	0.179555	0.163147	0.172181	0.165607	0.175735	0.165736	0.209509	0.168215	0.161789	0.166017	0.188494	0.19159	0.163365	0.151058	0.154217	0.189764	0.148862	0.189357	0.149148	0.153889	0.159361	0.154351	0.167764
Porphyrin and chlorophyll metabolism	-0.0118269	0.0100277	-0.00125205	-0.0153248	0.00410033	-0.0203553	-0.00147605	-0.0339077	0.000267974	0.02979	-0.00748737	0.0431837	0.011145	0.01197	0.0220178	-0.0295695	0.0199652	0.0111175	-0.0106682	0.0102231	0.0170131	-0.0100784	-0.00670751	-0.0305676	0.00960362	0.0103814	-0.0124912	-0.0291554	-0.0125325	0.000468003	-0.0144516	-0.0186834	0.00856003	-0.00447943	-0.000204085	-0.00675254	0.0162534	0.0229264	0.0317756	-0.0170561	0.0275334	-0.00251595	-0.0209047	0.00434893	0.00434542	-0.0119238	-0.0302923	-0.00555275	-0.024644
PPAR signaling pathway	0.101956	0.113517	0.111487	0.112007	0.107075	0.0548882	0.116746	0.0403632	0.100456	0.145671	0.0835753	0.127672	0.1114	0.11393	0.092175	0.0781789	0.104621	0.11324	0.0792049	0.097	0.10062	0.0529573	0.0882703	0.100218	0.0862527	0.104917	0.0924691	0.0590287	0.105149	0.0886028	0.0868585	0.115343	0.152994	0.094431	0.0741407	0.100434	0.106551	0.0879363	0.118694	0.110588	0.112829	0.0992662	0.0873798	0.104075	0.123375	0.0985367	0.0676156	0.101469	0.0918887
Primary bile acid biosynthesis	-0.000111394	0.0143482	0.000451913	-0.0022219	0.0184134	-0.0314162	-0.00388161	-0.0403589	-0.0215207	0.0358067	-0.0259827	0.045234	-0.0343822	0.0145463	0.010199	-0.0801222	-0.000900573	-0.0220942	-0.0460074	-0.0322911	0.0287732	-0.0806909	-0.0507978	-0.0878711	-0.0312306	0.00858779	-0.0574229	-0.0976122	0.0118233	-0.0808491	-0.0840329	-0.0181126	0.0821539	-0.0362602	0.00115035	0.00589333	0.0247315	-0.026471	-0.00328839	-0.0154482	0.0482872	0.0251446	-0.0588264	-0.0726931	0.000723697	-0.00369044	-0.0479467	-0.0316952	-0.00872986
Primary immunodeficiency	-0.151852	-0.119004	-0.142048	-0.145296	-0.12994	-0.0860531	-0.127486	-0.0756904	-0.0227811	0.0813483	-0.0689204	0.0154772	-0.0645172	-0.0377989	-0.0197539	-0.124169	-0.0594729	-0.0348071	-0.0802686	-0.0860669	-0.0697283	-0.0389847	-0.0537916	-0.087655	-0.106701	-0.000632231	-0.0851708	-0.10416	-0.0726884	-0.0911536	-0.0525777	-0.125284	-0.0632497	-0.133181	-0.0417621	-0.0548383	-0.0167457	-0.0442659	-0.0308619	-0.100129	-0.0493519	0.0673684	-0.15004	-0.000464012	-0.120249	-0.1509	-0.0999765	-0.107771	-0.107887
Prion disease	0.312958	0.292283	0.312826	0.318716	0.32069	0.288408	0.304221	0.293094	0.310631	0.318433	0.289574	0.317338	0.2909	0.312557	0.304115	0.298892	0.296678	0.303917	0.295665	0.30223	0.314068	0.292125	0.28727	0.303607	0.296864	0.304544	0.29014	0.288057	0.282171	0.300047	0.301515	0.305235	0.294025	0.300881	0.304591	0.309892	0.304687	0.324025	0.300455	0.2899	0.305024	0.30341	0.302516	0.302771	0.302317	0.307916	0.28973	0.285788	0.291336
Progesterone-mediated oocyte maturation	0.131363	0.104393	0.129184	0.118586	0.123009	0.17006	0.116421	0.105655	0.121777	0.0976115	0.137818	0.0954315	0.132055	0.116522	0.101202	0.166463	0.116992	0.114558	0.142156	0.110962	0.119472	0.139842	0.112503	0.162821	0.115416	0.111879	0.113497	0.118517	0.110388	0.139545	0.145764	0.133933	0.0892886	0.108728	0.110919	0.111447	0.10906	0.131214	0.105917	0.112179	0.0953899	0.100335	0.11506	0.11487	0.110579	0.119256	0.111705	0.109698	0.115742
Prolactin signaling pathway	0.156611	0.110284	0.159875	0.161889	0.155906	0.135261	0.148388	0.154229	0.14907	0.136855	0.149227	0.123819	0.141034	0.149678	0.130931	0.161601	0.150087	0.154312	0.138517	0.146514	0.140531	0.140475	0.158361	0.163185	0.142735	0.158838	0.144115	0.16296	0.145003	0.149682	0.150807	0.158594	0.13707	0.157896	0.145743	0.152089	0.142919	0.121912	0.139196	0.16504	0.120008	0.178323	0.154907	0.179498	0.141982	0.136253	0.145272	0.151512	0.1727
Propanoate metabolism	0.220495	0.245707	0.219961	0.193267	0.20292	0.214278	0.250845	0.205672	0.252854	0.19576	0.205472	0.238107	0.213378	0.233732	0.218342	0.201324	0.204668	0.220495	0.185607	0.235988	0.247204	0.190815	0.213947	0.193355	0.252796	0.232523	0.21926	0.237518	0.257114	0.21357	0.202557	0.224611	0.277707	0.23503	0.211909	0.24296	0.206646	0.211013	0.263615	0.212792	0.218679	0.20069	0.230944	0.217367	0.243956	0.223287	0.208916	0.222208	0.226784
Prostate cancer	0.147753	0.158799	0.14613	0.168519	0.144386	0.211124	0.163183	0.20547	0.220114	0.193824	0.244262	0.174919	0.219781	0.205066	0.181205	0.21017	0.22742	0.217188	0.220736	0.17838	0.191536	0.212449	0.234172	0.232221	0.194665	0.199839	0.204351	0.196331	0.210298	0.203325	0.222263	0.203617	0.190897	0.192676	0.195135	0.196681	0.180894	0.178658	0.195334	0.188452	0.161572	0.219935	0.169933	0.207497	0.170128	0.169714	0.183341	0.198591	0.209324
Proteasome	0.325395	0.346402	0.330741	0.347427	0.335279	0.35656	0.338029	0.369069	0.399643	0.405948	0.392241	0.419628	0.379161	0.411329	0.400061	0.376334	0.380319	0.394551	0.378476	0.3662	0.413552	0.389322	0.37888	0.376937	0.360976	0.374987	0.337697	0.333407	0.360405	0.359616	0.373035	0.345423	0.342703	0.342181	0.373642	0.355202	0.392804	0.411596	0.361217	0.332604	0.385088	0.366651	0.339971	0.37083	0.347237	0.340598	0.341246	0.343498	0.333726
Protein digestion and absorption	-0.064679	-0.0882585	-0.0630397	-0.0604369	-0.0750984	-0.0927848	-0.0876848	-0.0751334	-0.0470753	0.0180043	-0.00600933	-0.0309913	-0.00281219	-0.0229554	-0.0477511	-0.0149802	0.0223477	-0.0248816	-0.00976058	-0.063915	-0.0529339	-0.0768731	-0.0210694	-0.0100616	-0.0645266	-0.062302	-0.0904087	-0.0659342	-0.0184621	-0.0220678	-0.0213487	-0.0567269	-0.0723268	-0.10557	-0.029385	-0.0496161	-0.0510916	-0.0500394	-0.0296072	-0.0615558	-0.0911926	0.0221119	-0.0859994	-0.038863	-0.0900196	-0.0768589	-0.0787828	-0.0714388	-0.0797594
Protein export	0.354496	0.386776	0.358541	0.369717	0.363527	0.387696	0.375035	0.40194	0.405119	0.420555	0.398136	0.423028	0.409592	0.400089	0.412456	0.409723	0.417645	0.414165	0.40752	0.403408	0.419768	0.385835	0.408991	0.414795	0.40262	0.398957	0.383528	0.376981	0.386961	0.393627	0.400841	0.389389	0.396431	0.379002	0.390156	0.401172	0.395539	0.434211	0.404511	0.362518	0.392984	0.384602	0.39052	0.389279	0.374466	0.371622	0.372183	0.376968	0.372811
Protein processing in endoplasmic reticulum	0.299531	0.321406	0.299336	0.310806	0.302396	0.309113	0.310829	0.308777	0.319661	0.331198	0.320467	0.318858	0.334051	0.312572	0.317129	0.298809	0.326981	0.333297	0.313858	0.314691	0.31888	0.312245	0.311981	0.321261	0.324097	0.32698	0.312295	0.312408	0.320172	0.314921	0.319231	0.316784	0.334619	0.315066	0.315945	0.322372	0.312196	0.314204	0.304438	0.307164	0.300569	0.329608	0.321891	0.333932	0.314506	0.298689	0.303925	0.310296	0.312674
Proteoglycans in cancer	0.154855	0.137606	0.159381	0.172835	0.149163	0.145999	0.165883	0.150983	0.184565	0.199274	0.210515	0.183613	0.196521	0.180453	0.179183	0.165347	0.206822	0.213933	0.17369	0.159847	0.156467	0.14634	0.194071	0.192665	0.154458	0.183069	0.167535	0.158108	0.185429	0.174067	0.183555	0.189478	0.187326	0.156018	0.183886	0.193189	0.166307	0.162311	0.189611	0.196816	0.135107	0.224869	0.151816	0.178977	0.162526	0.137643	0.143796	0.145595	0.179364
Proximal tubule bicarbonate reclamation	0.258762	0.242416	0.264966	0.26727	0.256783	0.209104	0.276127	0.16836	0.237538	0.171525	0.203414	0.208493	0.22949	0.237334	0.229059	0.226408	0.205733	0.181449	0.218242	0.259853	0.213443	0.156174	0.209989	0.208716	0.245126	0.237939	0.245209	0.161656	0.229545	0.237683	0.212988	0.267013	0.214818	0.244703	0.231688	0.245867	0.257508	0.2137	0.261397	0.259218	0.249438	0.174726	0.250746	0.238225	0.265153	0.27924	0.210666	0.238836	0.229768
Purine metabolism	0.147889	0.132525	0.144983	0.134748	0.143599	0.105486	0.148713	0.105718	0.127919	0.137294	0.12427	0.142525	0.11923	0.124131	0.126229	0.115883	0.121765	0.116045	0.110822	0.109772	0.12332	0.128208	0.115513	0.129477	0.121847	0.120596	0.127744	0.110828	0.111881	0.145602	0.115492	0.143018	0.135377	0.12006	0.120106	0.135586	0.118885	0.134514	0.12805	0.124914	0.118457	0.10777	0.115763	0.111026	0.148201	0.13192	0.106887	0.114364	0.10875
Pyrimidine metabolism	0.0984308	0.119892	0.100819	0.0917356	0.10581	0.165526	0.101116	0.146532	0.205025	0.205925	0.190011	0.210378	0.185337	0.200934	0.195279	0.180405	0.179388	0.193414	0.189142	0.12312	0.216993	0.210813	0.174833	0.182869	0.150528	0.132016	0.129501	0.133258	0.1873	0.173652	0.174105	0.141843	0.140712	0.113591	0.151831	0.126633	0.169844	0.19928	0.166148	0.112947	0.159902	0.168518	0.125584	0.139871	0.113282	0.127975	0.145267	0.139087	0.108676
Pyruvate metabolism	0.229086	0.218554	0.225334	0.200447	0.213511	0.19062	0.233294	0.165089	0.192954	0.186683	0.164164	0.195927	0.186381	0.195209	0.199233	0.195612	0.18308	0.169424	0.184669	0.20915	0.197492	0.186638	0.160591	0.15623	0.214008	0.205907	0.196313	0.192134	0.190487	0.194486	0.182327	0.204956	0.226468	0.21797	0.189951	0.212603	0.193265	0.190247	0.218687	0.190022	0.215041	0.176852	0.202311	0.1958	0.227171	0.222912	0.193156	0.203164	0.18509
Rap1 signaling pathway	0.160448	0.13019	0.157494	0.164338	0.156831	0.136663	0.156959	0.130358	0.143872	0.134185	0.155456	0.12375	0.139795	0.137545	0.127709	0.127921	0.148473	0.150453	0.126049	0.146395	0.107654	0.110057	0.141168	0.149547	0.113135	0.164023	0.156211	0.119987	0.127248	0.123357	0.161812	0.162551	0.13847	0.131462	0.152805	0.16617	0.13762	0.114363	0.16354	0.168288	0.132529	0.161782	0.122014	0.136289	0.150759	0.139851	0.123244	0.134547	0.166292
Ras signaling pathway	0.146852	0.128783	0.140675	0.154288	0.138721	0.101884	0.14052	0.102323	0.114965	0.106139	0.112676	0.0991126	0.102127	0.10976	0.101778	0.10537	0.113118	0.119039	0.0997101	0.123762	0.0958688	0.0924729	0.118338	0.119858	0.111343	0.12273	0.128301	0.0999805	0.111334	0.116078	0.119416	0.143299	0.114286	0.124708	0.121728	0.139904	0.109904	0.0935546	0.129985	0.141838	0.101557	0.143488	0.117788	0.126394	0.137057	0.124892	0.110994	0.112081	0.133174
Regulation of actin cytoskeleton	0.18282	0.16689	0.179183	0.186007	0.176715	0.171746	0.193568	0.170512	0.189387	0.186799	0.206709	0.174253	0.213628	0.180258	0.186313	0.168446	0.206922	0.20507	0.186395	0.191994	0.148472	0.161461	0.192414	0.19394	0.170962	0.211926	0.195954	0.162221	0.184704	0.164839	0.200916	0.203136	0.191595	0.170484	0.194811	0.213111	0.194961	0.164953	0.202288	0.205446	0.166629	0.213581	0.1559	0.190655	0.185779	0.16174	0.158926	0.168559	0.189801
Regulation of lipolysis in adipocytes	0.13233	0.0975191	0.134067	0.123144	0.133777	0.0834306	0.115739	0.0472619	0.0419168	0.0448747	0.058782	0.0191033	0.063692	0.0548587	0.0287329	0.0548817	0.0591795	0.0386567	0.0561434	0.100004	0.0389721	0.0504667	0.0383079	0.0691592	0.0655574	0.0958836	0.114327	0.0602914	0.0356326	0.0880849	0.0768542	0.107948	0.113063	0.0942931	0.10015	0.104272	0.0723085	0.0376756	0.101981	0.100618	0.0874632	0.0782409	0.0727718	0.0938988	0.113427	0.106903	0.0768837	0.0906874	0.111726
Relaxin signaling pathway	0.189064	0.154315	0.1928	0.197579	0.184671	0.175999	0.187192	0.180339	0.192136	0.190901	0.205805	0.173421	0.188531	0.184025	0.177796	0.194821	0.195828	0.19328	0.196194	0.192704	0.166687	0.168445	0.198413	0.206813	0.182308	0.196678	0.186512	0.190071	0.173158	0.214706	0.210556	0.206335	0.172036	0.175849	0.203628	0.218886	0.166464	0.169649	0.182037	0.19849	0.159388	0.199097	0.18067	0.201562	0.18427	0.175578	0.168891	0.173705	0.191804
Renal cell carcinoma	0.302622	0.297429	0.301597	0.314023	0.296964	0.293336	0.296445	0.297521	0.300676	0.28006	0.318117	0.279192	0.318828	0.296841	0.288255	0.295427	0.304116	0.309893	0.294328	0.292338	0.278346	0.289246	0.31018	0.320806	0.290372	0.309902	0.304432	0.291537	0.296103	0.295266	0.314167	0.307967	0.291784	0.297686	0.295279	0.304842	0.286525	0.28068	0.301276	0.314914	0.261677	0.305878	0.295428	0.297668	0.293156	0.284332	0.295036	0.293897	0.31102
Renin-angiotensin system	-0.0510823	-0.073939	-0.0486479	-0.0532218	-0.0502349	-0.0447072	-0.0449577	-0.040819	0.00602558	0.0171204	-0.00588632	-0.0125874	-0.00623604	-0.0112515	-0.0112751	-0.0398199	-0.00908514	-0.00812171	-0.0383999	-0.0372312	-0.0174731	0.00231109	-0.00240134	-0.013779	-0.0285176	-0.0566844	-0.0536642	-0.0142265	-0.0326739	-0.0178023	-0.0127822	-0.0383719	-0.0454865	-0.0525872	-0.0248085	-0.0394031	-0.0441145	-0.0342248	-0.0428863	-0.0444528	-0.0507726	-0.0230114	-0.0480665	-0.0187326	-0.0442189	-0.0510337	-0.0455653	-0.0422643	-0.073234
Renin secretion	0.142133	0.0977161	0.145459	0.137264	0.1367	0.0696328	0.141394	0.0467476	0.0716505	0.0721372	0.0662645	0.040396	0.0650339	0.0563292	0.0533471	0.0550527	0.0586384	0.0516875	0.0702458	0.0931377	0.0475337	0.0608803	0.0469174	0.0729564	0.0842022	0.0980345	0.0904881	0.0732412	0.0391331	0.0991313	0.0702826	0.12727	0.0652397	0.0970524	0.0993595	0.117161	0.0665893	0.0682289	0.071007	0.118734	0.0862814	0.0899896	0.0863584	0.0983889	0.123063	0.115614	0.0703105	0.0940624	0.0981897
Retinol metabolism	-0.215144	-0.225967	-0.212861	-0.220048	-0.217977	-0.257872	-0.204851	-0.248928	-0.219971	-0.201145	-0.220627	-0.191594	-0.226766	-0.214248	-0.212108	-0.238961	-0.20999	-0.222944	-0.235804	-0.203884	-0.201178	-0.240276	-0.238062	-0.231734	-0.231282	-0.20328	-0.211262	-0.26088	-0.20367	-0.232042	-0.222776	-0.223673	-0.190162	-0.225111	-0.216382	-0.204399	-0.186797	-0.195532	-0.194034	-0.219244	-0.197083	-0.194809	-0.224839	-0.249459	-0.208795	-0.218338	-0.222313	-0.221881	-0.213574
Retrograde endocannabinoid signaling	0.314188	0.221484	0.310693	0.299071	0.303417	0.182583	0.287064	0.163207	0.178842	0.149531	0.142985	0.145532	0.139256	0.167273	0.162637	0.191995	0.13983	0.135687	0.178211	0.22008	0.163132	0.170661	0.152944	0.167658	0.180343	0.215884	0.217009	0.194584	0.150261	0.224621	0.190112	0.274039	0.181722	0.233929	0.215626	0.233196	0.18689	0.198391	0.18019	0.251449	0.200464	0.171791	0.242986	0.186472	0.269833	0.268782	0.216719	0.199452	0.232294
Rheumatoid arthritis	0.0832415	0.0848824	0.0953293	0.125928	0.128091	0.101402	0.103796	0.11641	0.14441	0.304137	0.114773	0.267112	0.160149	0.156808	0.214545	0.0822778	0.218544	0.225928	0.126457	0.108163	0.128312	0.116434	0.150051	0.141855	0.092034	0.207084	0.0950166	0.112927	0.10876	0.085987	0.15938	0.0789136	0.192808	0.0738948	0.149653	0.162005	0.181621	0.191806	0.171616	0.175459	0.137169	0.262685	0.0980644	0.152287	0.0660091	0.0526694	0.0677411	0.0583351	0.148107
Riboflavin metabolism	0.176906	0.151022	0.171853	0.1628	0.17165	0.164201	0.14994	0.169059	0.196923	0.310301	0.174085	0.256866	0.193497	0.190414	0.218457	0.132192	0.185823	0.222104	0.200346	0.176116	0.232222	0.169839	0.17094	0.147115	0.16208	0.164741	0.123579	0.139458	0.188835	0.138945	0.151149	0.159195	0.158408	0.119299	0.155949	0.165821	0.198217	0.240372	0.159811	0.123462	0.185426	0.18397	0.109379	0.172226	0.161222	0.157065	0.129421	0.109605	0.116675
Ribosome	0.411816	0.418812	0.41011	0.413094	0.427971	0.456308	0.419918	0.467478	0.470236	0.481598	0.456983	0.48682	0.442953	0.477058	0.461756	0.457289	0.452024	0.455678	0.465157	0.457029	0.491594	0.4667	0.463169	0.458994	0.466227	0.452146	0.451132	0.461129	0.444043	0.462298	0.459802	0.427525	0.435226	0.453701	0.454674	0.450882	0.462943	0.485943	0.442478	0.41044	0.473987	0.444376	0.458637	0.447988	0.436487	0.442261	0.454139	0.431366	0.43075
Ribosome biogenesis in eukaryotes	0.167944	0.195354	0.164316	0.179291	0.17634	0.26078	0.182432	0.273721	0.23462	0.208972	0.239458	0.222933	0.229186	0.217941	0.232048	0.228415	0.215551	0.213882	0.232499	0.220256	0.224931	0.257351	0.226339	0.23461	0.239975	0.2222	0.219119	0.240504	0.214275	0.248185	0.232222	0.185905	0.18654	0.219439	0.224457	0.204178	0.221542	0.233733	0.177935	0.183562	0.217594	0.194192	0.234498	0.238251	0.192128	0.206405	0.237464	0.220732	0.204736
RIG-I-like receptor signaling pathway	0.028279	0.0325482	0.037454	0.0362037	0.0382962	0.0242497	0.0352257	0.0465188	0.0903791	0.114413	0.0735557	0.1001	0.0567273	0.0915286	0.086841	0.0349938	0.0659572	0.0877563	0.0391501	0.046714	0.0854745	0.0889433	0.0835207	0.0546108	0.0481183	0.0679198	0.0269962	0.0532144	0.0454982	0.0387293	0.0580197	0.0298531	0.0664515	0.0322115	0.0485018	0.0436736	0.0928893	0.0661007	0.0693893	0.0332019	0.0616586	0.105954	0.039109	0.0852339	0.0440845	0.0132139	0.0451083	0.0430476	0.0494942
RNA degradation	0.190709	0.217943	0.191214	0.189333	0.195968	0.2629	0.201782	0.284215	0.25571	0.235173	0.251692	0.239593	0.240902	0.244161	0.227603	0.262308	0.24715	0.246564	0.259751	0.243128	0.242957	0.256934	0.257578	0.264707	0.257349	0.231459	0.238436	0.255995	0.246143	0.2488	0.247575	0.197779	0.224893	0.231276	0.230052	0.229079	0.228617	0.251186	0.207434	0.212721	0.224743	0.21946	0.244928	0.25178	0.203673	0.215797	0.234473	0.231993	0.229526
RNA polymerase	0.229281	0.24158	0.231828	0.231175	0.237601	0.271823	0.225129	0.305104	0.282223	0.253595	0.283197	0.261447	0.252362	0.278978	0.270178	0.274356	0.252231	0.259257	0.276748	0.264421	0.283629	0.275825	0.27865	0.25762	0.276682	0.248738	0.252823	0.279919	0.262251	0.28832	0.263054	0.230978	0.21832	0.25831	0.251382	0.242979	0.252914	0.28903	0.234271	0.226674	0.26476	0.223657	0.265926	0.252738	0.247653	0.257435	0.272346	0.26092	0.229826
RNA transport	0.206879	0.228632	0.202574	0.213447	0.212167	0.291823	0.217104	0.286394	0.279491	0.254281	0.279807	0.257789	0.275811	0.26306	0.264833	0.283761	0.267554	0.267966	0.276683	0.258004	0.265928	0.281641	0.280319	0.283272	0.270429	0.256285	0.2546	0.263505	0.25529	0.267006	0.273959	0.227074	0.232236	0.252352	0.256039	0.245984	0.246226	0.275538	0.223665	0.228863	0.244406	0.237806	0.257585	0.263464	0.229929	0.236671	0.261674	0.250297	0.247918
Salivary secretion	0.116791	0.0537172	0.115874	0.103691	0.103758	0.0168295	0.109125	-0.0126841	0.00179825	-0.00885781	0.0104808	-0.0294073	0.00724859	-0.00391373	-0.00698347	-0.0160851	0.00505838	-0.015967	0.00904928	0.033581	-0.0356865	0.0060374	-0.00277208	-0.00330766	0.00516053	0.0491096	0.0413507	0.00854346	-0.0108266	0.0414485	0.0104069	0.0915005	0.0376262	0.0424747	0.0393826	0.0618268	0.0122304	-0.00838405	0.0368111	0.0862055	0.00464273	0.0319819	0.0504548	0.025715	0.0953345	0.0756632	0.027877	0.0159343	0.0562274
Salmonella infection	0.246054	0.241439	0.248958	0.25911	0.252003	0.250522	0.256565	0.253948	0.268178	0.291801	0.262042	0.281226	0.270439	0.26222	0.277173	0.24335	0.282061	0.283213	0.245412	0.261636	0.248376	0.245151	0.264574	0.259775	0.255675	0.281256	0.262845	0.247927	0.250884	0.240898	0.270497	0.258836	0.279818	0.25053	0.268926	0.275759	0.271894	0.265064	0.268303	0.274285	0.253283	0.297874	0.247711	0.268765	0.255618	0.238428	0.240565	0.242003	0.262707
Selenocompound metabolism	0.121525	0.127523	0.118359	0.0996132	0.110866	0.152836	0.134946	0.186265	0.169941	0.153	0.171867	0.169848	0.153793	0.163815	0.140437	0.138309	0.154782	0.149756	0.10846	0.177288	0.192679	0.138412	0.161842	0.154514	0.18119	0.151421	0.168626	0.191478	0.162888	0.146633	0.167285	0.0989804	0.167251	0.155319	0.151519	0.156719	0.133345	0.153222	0.178767	0.143043	0.148614	0.145439	0.171668	0.18108	0.128897	0.128178	0.148313	0.148986	0.16873
Serotonergic synapse	0.142441	0.068713	0.14183	0.127928	0.127245	0.03556	0.118784	0.0197629	0.0190655	0.0203199	0.00942967	0.0120191	0.0111245	0.00529568	0.0239946	0.0241422	0.0111591	0.0071598	0.0252913	0.0600797	-0.00785344	0.0331073	0.0146454	0.0304792	0.0275152	0.0714702	0.0697367	0.0278256	0.00488101	0.0627348	0.0351066	0.113708	0.0559798	0.0602335	0.0604865	0.0874382	0.0419111	0.0387231	0.039034	0.101899	0.0447608	0.0483955	0.079969	0.0452446	0.105836	0.0965108	0.0520351	0.043629	0.0826395
Shigellosis	0.212466	0.212225	0.217486	0.224135	0.216668	0.22615	0.22178	0.236704	0.231502	0.256129	0.236228	0.243782	0.249081	0.228854	0.244404	0.217119	0.253681	0.251081	0.23699	0.238337	0.214679	0.213892	0.228286	0.235409	0.216957	0.251625	0.2368	0.225064	0.219275	0.203525	0.244194	0.224233	0.243186	0.219374	0.239877	0.239803	0.236487	0.222405	0.237784	0.23717	0.222254	0.256707	0.208585	0.2418	0.223031	0.209886	0.20939	0.216322	0.234379
Signaling pathways regulating pluripotency of stem cells	0.0681128	0.0495723	0.0734988	0.0760092	0.0618014	0.0908475	0.0765614	0.103746	0.078161	0.0496662	0.101748	0.0542391	0.0783244	0.0725638	0.0680558	0.0685176	0.0800548	0.086993	0.0692168	0.0796527	0.0683375	0.0822907	0.0877346	0.0719338	0.0856169	0.0897064	0.102343	0.0999232	0.103925	0.0854511	0.0919775	0.0849648	0.089808	0.0948691	0.0888159	0.0959059	0.0823191	0.0541532	0.0790735	0.0968801	0.0636641	0.0737974	0.0904699	0.0972706	0.0800302	0.0782701	0.097065	0.0876148	0.110352
Small cell lung cancer	0.0872915	0.113989	0.0863602	0.125006	0.0986823	0.164652	0.11919	0.174539	0.209507	0.19398	0.235806	0.186757	0.210333	0.199661	0.192905	0.198339	0.211247	0.231638	0.19016	0.162715	0.181469	0.201069	0.215048	0.22212	0.175977	0.168562	0.144357	0.164929	0.195846	0.183253	0.199242	0.157934	0.161797	0.142536	0.177301	0.168253	0.167356	0.165881	0.167379	0.159697	0.144446	0.215754	0.132909	0.196649	0.124872	0.11124	0.133203	0.145775	0.171582
SNARE interactions in vesicular transport	0.24243	0.273949	0.24517	0.245176	0.250155	0.235219	0.259305	0.246158	0.258722	0.2938	0.219349	0.274407	0.247554	0.243564	0.258906	0.230491	0.246443	0.245912	0.22357	0.260114	0.247913	0.248909	0.239606	0.253279	0.253647	0.265419	0.250614	0.246806	0.228264	0.247774	0.230796	0.240786	0.248295	0.254941	0.256646	0.260806	0.252862	0.272569	0.247479	0.254373	0.25706	0.245409	0.257629	0.255048	0.260174	0.247887	0.240815	0.249484	0.233399
Sphingolipid metabolism	0.1695	0.22959	0.163279	0.180861	0.177853	0.154551	0.180685	0.143487	0.153272	0.19963	0.150476	0.157762	0.184906	0.153829	0.177842	0.150786	0.183809	0.152797	0.184675	0.175739	0.15997	0.173245	0.146783	0.148528	0.196233	0.172326	0.181814	0.166345	0.143628	0.197148	0.19192	0.163484	0.168037	0.175293	0.173948	0.17074	0.204384	0.195572	0.191435	0.166532	0.197329	0.200009	0.149693	0.162369	0.178001	0.154891	0.165216	0.195169	0.154608
Sphingolipid signaling pathway	0.231006	0.231077	0.232058	0.239218	0.233408	0.218225	0.240759	0.203304	0.195274	0.200948	0.202556	0.182779	0.201787	0.188144	0.198725	0.176053	0.208166	0.197329	0.187946	0.220658	0.183735	0.200151	0.19968	0.192063	0.217141	0.238528	0.230606	0.206021	0.176473	0.21773	0.206945	0.234511	0.215314	0.223465	0.227575	0.23683	0.222627	0.198054	0.213582	0.234718	0.221891	0.216517	0.214436	0.218028	0.242699	0.224407	0.215047	0.221371	0.225276
Spinocerebellar ataxia	0.28103	0.229887	0.279351	0.27328	0.268026	0.230162	0.259978	0.221687	0.198766	0.178157	0.193648	0.1679	0.197011	0.18141	0.191435	0.20395	0.194621	0.191056	0.192765	0.228923	0.18002	0.206646	0.19319	0.194182	0.215008	0.230775	0.234708	0.222335	0.183494	0.226584	0.205374	0.251138	0.208148	0.237858	0.231286	0.236981	0.197698	0.198938	0.190107	0.250717	0.20192	0.205822	0.242747	0.229127	0.252039	0.251833	0.232546	0.22899	0.237887
Spliceosome	0.293318	0.327141	0.29083	0.305697	0.306495	0.376424	0.306655	0.383114	0.364563	0.33421	0.366562	0.346077	0.351282	0.350806	0.352441	0.374055	0.351693	0.360016	0.363661	0.349669	0.352162	0.3636	0.368228	0.378178	0.36292	0.356023	0.349085	0.33795	0.362524	0.346764	0.369424	0.314943	0.323466	0.340639	0.353237	0.343121	0.347887	0.369108	0.32757	0.320104	0.352342	0.32804	0.357785	0.356051	0.322248	0.335948	0.357633	0.352315	0.350808
Staphylococcus aureus infection	-0.147147	-0.104988	-0.0982039	-0.122728	-0.115617	-0.0636427	-0.0729776	-0.0490482	-0.0237045	0.114921	-0.0405892	0.0905833	0.016863	0.00267575	0.0527942	-0.10323	0.0396949	0.0438165	-0.031111	-0.0525841	-0.0709853	-0.0604462	-0.0336502	-0.0228872	-0.0935932	0.0639411	-0.0612169	-0.028891	-0.0565598	-0.111378	0.0159166	-0.0999205	0.0173797	-0.161035	0.00626418	0.00128978	0.0202774	0.0545027	0.00503938	0.0172317	-0.0201744	0.0962336	-0.13349	-0.0170762	-0.118381	-0.153792	-0.12797	-0.107649	-0.0704972
Starch and sucrose metabolism	0.0365377	0.0293871	0.0350032	0.0242549	0.0258466	0.0170015	0.0447485	0.037486	0.0526111	0.0906975	0.0841996	0.110252	0.104261	0.0782546	0.0910535	0.0447027	0.0973767	0.102841	0.0533103	0.0541426	0.0840641	0.0125898	0.0676403	0.0897549	0.0125201	0.0492298	0.0324357	0.0192046	0.0668053	0.0113993	0.068524	0.0564977	0.0999907	0.0383044	0.0262608	0.0635417	0.0706561	0.0512006	0.0823048	0.0464483	0.0370127	0.0777834	0.0316264	0.040616	0.043769	0.0365953	0.00938643	-0.00104994	0.0180268
Steroid biosynthesis	0.180479	0.237195	0.178875	0.182357	0.153976	0.204804	0.210962	0.113442	0.179544	0.197607	0.210018	0.174534	0.222775	0.231393	0.190291	0.249806	0.175461	0.196335	0.198539	0.200036	0.238389	0.186749	0.150846	0.225725	0.259675	0.184425	0.192886	0.175961	0.198142	0.210985	0.226945	0.191108	0.214485	0.234228	0.194796	0.191651	0.24415	0.226963	0.229243	0.228055	0.213723	0.182294	0.192327	0.195314	0.220483	0.232577	0.228777	0.262551	0.190936
Steroid hormone biosynthesis	-0.221359	-0.213723	-0.221388	-0.218809	-0.222688	-0.246045	-0.215277	-0.258918	-0.246575	-0.205446	-0.260282	-0.189034	-0.242377	-0.239272	-0.230509	-0.267083	-0.228872	-0.250677	-0.274343	-0.207338	-0.227142	-0.222216	-0.263303	-0.258849	-0.220331	-0.219973	-0.240617	-0.191177	-0.242564	-0.225417	-0.26071	-0.231039	-0.189398	-0.221287	-0.235999	-0.23002	-0.247493	-0.252704	-0.23206	-0.231719	-0.201991	-0.233092	-0.209659	-0.198835	-0.222313	-0.23469	-0.214907	-0.242208	-0.243496
Sulfur metabolism	0.182143	0.265613	0.206677	0.163599	0.192029	0.189385	0.220342	0.250643	0.247341	0.35926	0.243285	0.361997	0.242202	0.28821	0.215352	0.205582	0.241365	0.255934	0.213759	0.264367	0.30307	0.20947	0.261405	0.223056	0.256244	0.245333	0.280641	0.28488	0.272369	0.223987	0.269742	0.216347	0.296991	0.244995	0.233117	0.259394	0.313116	0.300966	0.277503	0.182018	0.321294	0.266377	0.246297	0.275503	0.259941	0.225902	0.223205	0.224392	0.203144
Sulfur relay system	0.159872	0.239786	0.167071	0.139475	0.191788	0.210778	0.162761	0.236914	0.257574	0.200789	0.213123	0.23891	0.176246	0.298206	0.229081	0.184823	0.175434	0.154327	0.226112	0.238832	0.347496	0.24811	0.227497	0.159169	0.249132	0.200167	0.210259	0.267221	0.258219	0.200682	0.222307	0.178677	0.19479	0.243028	0.208561	0.191091	0.229721	0.250622	0.224964	0.124051	0.295677	0.154061	0.227378	0.197388	0.203187	0.25435	0.247086	0.237429	0.171397
Synaptic vesicle cycle	0.320258	0.261161	0.318546	0.308829	0.312834	0.190629	0.293559	0.1499	0.18666	0.121097	0.12763	0.116568	0.12586	0.149951	0.166114	0.220347	0.131455	0.122437	0.168551	0.217867	0.142584	0.188465	0.136185	0.165457	0.168689	0.213684	0.241997	0.1889	0.149955	0.257642	0.197653	0.290372	0.135778	0.256441	0.2286	0.233566	0.224312	0.215146	0.184247	0.278375	0.179517	0.146821	0.263479	0.191336	0.281975	0.293209	0.229063	0.215407	0.242365
Synthesis and degradation of ketone bodies	0.208057	0.177236	0.19447	0.177714	0.182539	0.121066	0.217324	0.0847679	0.135609	0.0968315	0.118709	0.166549	0.138988	0.14732	0.17453	0.139209	0.11739	0.136165	0.110304	0.165564	0.176838	0.0899762	0.0964273	0.130129	0.172642	0.163869	0.141305	0.0959666	0.166471	0.0861879	0.111558	0.176092	0.203771	0.176776	0.135056	0.189105	0.13697	0.162044	0.160258	0.152719	0.170031	0.113592	0.159632	0.0880529	0.199069	0.184704	0.141433	0.117266	0.144117
Systemic lupus erythematosus	-0.0920257	-0.0473719	-0.0667569	-0.0667705	-0.073438	0.0416475	-0.0528208	-0.00717969	-0.000784538	0.0829683	0.00340823	0.0730165	0.0344512	0.0108264	0.0516118	-0.0468979	0.0346731	0.0150012	0.242767	-0.0376964	0.0282903	-0.0180407	-0.0199629	0.00090624	-0.0396608	0.016764	-0.0374568	-0.0422465	-0.0115604	-0.0586755	0.0136931	-0.0488656	0.0145141	-0.0875185	-0.00551892	-0.0147511	0.0256037	0.0913871	0.0152644	-0.0130985	-0.0198148	0.0461269	-0.0856223	0.0098959	-0.0724412	-0.0943986	-0.0740727	-0.0582712	-0.0536109
T cell receptor signaling pathway	0.12253	0.0981	0.124657	0.126481	0.125459	0.114114	0.11828	0.13092	0.110931	0.14965	0.11108	0.118339	0.11114	0.103157	0.118932	0.0985655	0.116477	0.12177	0.0917537	0.10715	0.0924742	0.101477	0.106853	0.108644	0.0965204	0.149654	0.123225	0.119658	0.0927273	0.107315	0.118972	0.116027	0.118606	0.103662	0.130184	0.129096	0.121728	0.110371	0.117563	0.131901	0.104967	0.164713	0.111649	0.139831	0.112121	0.111646	0.11354	0.110813	0.135203
Taste transduction	-0.0453976	-0.159822	-0.0448597	-0.0715458	-0.0653541	-0.181004	-0.0848585	-0.205162	-0.23292	-0.244106	-0.217554	-0.262719	-0.217418	-0.224834	-0.232701	-0.191105	-0.227421	-0.232885	-0.181623	-0.149196	-0.244089	-0.2069	-0.226876	-0.215488	-0.193827	-0.175419	-0.164119	-0.188064	-0.221535	-0.165307	-0.213599	-0.0921546	-0.228552	-0.151711	-0.182366	-0.163789	-0.19831	-0.212615	-0.224389	-0.118075	-0.206917	-0.21439	-0.138385	-0.199542	-0.112732	-0.106791	-0.156346	-0.177461	-0.152915
Taurine and hypotaurine metabolism	0.167431	0.12526	0.156245	0.153926	0.152404	0.0182736	0.132781	0.0644795	0.105694	0.0361836	0.02858	0.00997833	0.0111898	0.0938806	0.0419971	0.156432	0.0553867	0.0143012	0.0850418	0.13277	0.0820992	0.0374912	0.0961418	0.0949849	0.102343	0.0845597	0.0756572	0.0644596	0.0716407	0.0961532	0.105445	0.118838	-0.00393244	0.0890934	0.0691543	0.0886295	0.100822	0.0635145	0.0873096	0.154675	0.136782	0.0833193	0.152201	0.0758747	0.113075	0.141757	0.0804214	0.0665873	0.0987246
Terpenoid backbone biosynthesis	0.24124	0.264203	0.236294	0.235307	0.220022	0.270538	0.248243	0.207829	0.25084	0.232675	0.232589	0.229693	0.259093	0.246172	0.250238	0.25333	0.234173	0.24142	0.221166	0.257216	0.289303	0.252287	0.211058	0.25489	0.275853	0.258672	0.233583	0.22666	0.230254	0.249836	0.244241	0.249332	0.262046	0.264443	0.259389	0.237741	0.248027	0.26058	0.231866	0.265658	0.279343	0.233016	0.231598	0.234339	0.259672	0.269227	0.250591	0.275719	0.239483
TGF-beta signaling pathway	0.0877194	0.101544	0.087606	0.115682	0.0880491	0.142462	0.121708	0.149458	0.133784	0.137384	0.167306	0.130777	0.147819	0.125693	0.126957	0.104057	0.14353	0.152316	0.138129	0.140465	0.114651	0.12582	0.146097	0.12625	0.154799	0.172517	0.157161	0.154322	0.141873	0.116636	0.176287	0.124319	0.14861	0.151451	0.159555	0.163929	0.14521	0.136268	0.135817	0.168789	0.122338	0.159976	0.146156	0.151937	0.130671	0.110952	0.15988	0.132085	0.167211
Th1 and Th2 cell differentiation	0.0850718	0.0897378	0.09002	0.0897805	0.097373	0.1218	0.119151	0.151043	0.145873	0.199515	0.131198	0.151594	0.135699	0.134929	0.152113	0.0970597	0.156801	0.154143	0.128944	0.135266	0.105557	0.12645	0.169072	0.135628	0.122359	0.195679	0.131334	0.140046	0.133094	0.110783	0.163274	0.106321	0.13283	0.0815476	0.172983	0.170205	0.158582	0.146316	0.154007	0.160311	0.135192	0.205808	0.0847871	0.164872	0.1031	0.0911702	0.0977368	0.0904675	0.128333
Th17 cell differentiation	0.098813	0.0920106	0.110147	0.119465	0.11422	0.111734	0.118173	0.141801	0.143218	0.218424	0.127162	0.1774	0.141322	0.143521	0.166853	0.0945215	0.169921	0.171972	0.129142	0.126861	0.11731	0.123311	0.154605	0.137128	0.117538	0.192909	0.12946	0.14565	0.127438	0.100418	0.151555	0.108971	0.168656	0.0896317	0.169505	0.164291	0.156848	0.15301	0.149011	0.165864	0.129487	0.226516	0.0979575	0.169603	0.0969198	0.0806547	0.09596	0.0882195	0.135273
Thermogenesis	0.293475	0.285722	0.291083	0.291978	0.296243	0.280807	0.289058	0.283826	0.298571	0.288991	0.279947	0.28355	0.265063	0.306267	0.27665	0.293768	0.273083	0.271356	0.288876	0.295173	0.310894	0.280445	0.283843	0.291125	0.295077	0.276259	0.287426	0.287462	0.278352	0.295301	0.292309	0.287801	0.277307	0.29097	0.281214	0.28753	0.279742	0.299242	0.290723	0.270513	0.292399	0.27344	0.293625	0.290556	0.28832	0.297464	0.283206	0.289595	0.278467
Thiamine metabolism	0.0939864	0.0862935	0.0983375	0.0813428	0.101547	0.0360223	0.113337	-0.00525195	0.042745	0.055293	0.00935841	0.10453	0.0526916	0.0482581	0.100508	0.0139955	0.0300658	0.023291	-0.00737881	0.0647637	0.0640429	0.045896	-0.00567474	0.0129433	0.0696214	0.0743899	0.0548281	-0.00580034	0.0437925	0.0355109	-0.00645098	0.0912738	0.11905	0.0887006	0.0363657	0.102097	0.0953291	0.0711998	0.0609147	0.0598411	0.0904919	-0.00763297	0.0508919	0.0323443	0.113885	0.102021	0.0395255	0.0598021	0.0111955
Thyroid cancer	0.20508	0.200526	0.211686	0.24755	0.221559	0.270864	0.226124	0.281483	0.27234	0.264565	0.279416	0.247095	0.251103	0.268277	0.263019	0.257064	0.272905	0.278501	0.275306	0.264812	0.252229	0.280681	0.272123	0.273749	0.296169	0.28634	0.268169	0.273254	0.253538	0.259183	0.282827	0.248884	0.252988	0.267717	0.271466	0.286663	0.276879	0.267969	0.241678	0.280761	0.272044	0.274987	0.272818	0.291776	0.24274	0.256619	0.270131	0.257958	0.282077
Thyroid hormone signaling pathway	0.239544	0.213294	0.239783	0.239208	0.227148	0.252231	0.249399	0.24583	0.219619	0.189475	0.235322	0.179232	0.22858	0.206752	0.21143	0.219238	0.237132	0.214892	0.226412	0.252984	0.174435	0.243929	0.238351	0.225015	0.247095	0.255414	0.261709	0.242728	0.229404	0.242933	0.242732	0.256082	0.223831	0.253379	0.244815	0.259625	0.229699	0.202074	0.22856	0.268873	0.210836	0.233956	0.253529	0.258351	0.252951	0.243684	0.248966	0.244791	0.264106
Thyroid hormone synthesis	0.138443	0.110495	0.133985	0.132251	0.127368	0.126581	0.140821	0.104047	0.0991891	0.0836837	0.106131	0.0726781	0.0843748	0.0886489	0.0853418	0.0920711	0.100597	0.0821616	0.106095	0.122674	0.0741817	0.110145	0.100605	0.103972	0.10898	0.127506	0.133874	0.104996	0.0876148	0.111048	0.103914	0.140966	0.112968	0.117488	0.120547	0.132521	0.0872272	0.0741048	0.116135	0.13447	0.0975926	0.107721	0.118087	0.132849	0.135343	0.133914	0.108871	0.10948	0.13106
Tight junction	0.170915	0.172695	0.17072	0.180171	0.173998	0.152793	0.180033	0.15184	0.149439	0.145595	0.159462	0.147367	0.165616	0.148055	0.15618	0.144937	0.168259	0.164873	0.1555	0.172574	0.136892	0.156277	0.162337	0.159997	0.160712	0.168569	0.174839	0.156193	0.156789	0.155723	0.167454	0.176489	0.178911	0.167218	0.165054	0.179462	0.169491	0.152554	0.168268	0.175348	0.157226	0.171997	0.158659	0.171516	0.173446	0.155884	0.153554	0.163318	0.169034
TNF signaling pathway	0.100645	0.0934231	0.105521	0.155206	0.134145	0.0962148	0.111732	0.105284	0.148828	0.241873	0.161641	0.216378	0.141308	0.160868	0.182313	0.124698	0.18777	0.221447	0.12155	0.111892	0.142415	0.121383	0.14345	0.149894	0.118325	0.15984	0.094749	0.122196	0.110177	0.105191	0.143155	0.105191	0.152392	0.121929	0.139403	0.127284	0.151101	0.118232	0.132882	0.152529	0.110222	0.193998	0.132785	0.153303	0.0952349	0.0834752	0.0911216	0.0958656	0.163034
Toll-like receptor signaling pathway	0.0732145	0.0485383	0.0875477	0.088645	0.101604	0.0758931	0.06847	0.102845	0.10848	0.203263	0.0966008	0.160976	0.104574	0.108293	0.124319	0.0608394	0.144596	0.142194	0.0701661	0.0652285	0.090675	0.0994357	0.102152	0.0922222	0.0569695	0.152964	0.0731866	0.108722	0.0627637	0.076496	0.102718	0.0507819	0.146791	0.0756265	0.0969018	0.113222	0.141691	0.129003	0.128523	0.119539	0.10099	0.206588	0.0888523	0.129271	0.0610814	0.0529498	0.0792405	0.0759145	0.123093
Toxoplasmosis	0.126654	0.144184	0.136912	0.142931	0.137099	0.157365	0.16346	0.170748	0.233959	0.277365	0.211918	0.238301	0.222357	0.235855	0.224872	0.157104	0.227825	0.250722	0.180639	0.181171	0.200112	0.174227	0.225135	0.215068	0.168432	0.238545	0.176804	0.181289	0.208587	0.156479	0.223397	0.168885	0.225352	0.133998	0.215617	0.215495	0.209965	0.204436	0.224003	0.207951	0.174412	0.281871	0.134664	0.207462	0.152232	0.115609	0.144956	0.138506	0.179089
Transcriptional misregulation in cancer	0.0258368	0.0487424	0.033446	0.0613586	0.0422795	0.0878581	0.0502158	0.0939119	0.102928	0.130381	0.116442	0.120353	0.10683	0.0928487	0.109973	0.103185	0.12891	0.137106	0.142437	0.0830991	0.0909406	0.0840975	0.115633	0.12256	0.0761046	0.0978539	0.0862304	0.088987	0.106159	0.0736134	0.126525	0.064011	0.0893489	0.0691287	0.0846171	0.0840992	0.0988791	0.112779	0.102603	0.0843975	0.0788193	0.142879	0.0669586	0.11923	0.0409302	0.0409644	0.0655062	0.0859774	0.0909629
Tryptophan metabolism	0.0796572	0.0967354	0.0774091	0.0630623	0.0692287	0.0744678	0.0985227	0.0498628	0.087898	0.143339	0.0765627	0.139014	0.0834363	0.0979429	0.0988976	0.0739952	0.104542	0.0894135	0.0826646	0.0944455	0.103441	0.0794442	0.0653019	0.0849242	0.112715	0.108803	0.103822	0.0897738	0.0925968	0.0855026	0.0780033	0.0687477	0.136138	0.0998718	0.083472	0.108877	0.0963976	0.096734	0.126474	0.0762306	0.110482	0.103654	0.0934743	0.110522	0.0944468	0.0728706	0.0756302	0.0938589	0.0897278
Tuberculosis	0.122255	0.128373	0.136653	0.135259	0.137096	0.146232	0.143644	0.160776	0.181993	0.249036	0.167546	0.218071	0.184748	0.190336	0.199678	0.124326	0.195683	0.209395	0.157857	0.160244	0.152806	0.14777	0.180558	0.173553	0.1198	0.211594	0.167994	0.158567	0.158059	0.127716	0.193097	0.13508	0.188063	0.115947	0.187385	0.1878	0.192588	0.190724	0.189761	0.193533	0.165173	0.237066	0.113553	0.17435	0.125468	0.111502	0.126817	0.124865	0.168124
Type I diabetes mellitus	0.111767	0.103225	0.13122	0.115426	0.137631	0.122936	0.152698	0.133528	0.179477	0.263841	0.106388	0.220755	0.158209	0.157244	0.205456	0.0954838	0.198069	0.193734	0.146206	0.14056	0.131021	0.162311	0.176834	0.14908	0.114763	0.247309	0.123556	0.155617	0.140345	0.112041	0.173946	0.116434	0.193704	0.056217	0.207703	0.203748	0.200938	0.215899	0.180041	0.216234	0.131649	0.278042	0.0722237	0.18897	0.0949936	0.0759452	0.0809468	0.044057	0.142062
Type II diabetes mellitus	0.153606	0.0475817	0.157636	0.150736	0.136724	0.0286216	0.108285	0.0543239	0.0145677	0.0300895	0.0161191	0.0199412	0.0439833	0.0217673	0.0380023	0.0612454	0.0500947	0.0369555	0.0404629	0.0574703	0.0227653	0.0303298	0.0194632	0.0402548	0.029811	0.0584805	0.0616244	0.0634527	0.0111465	0.036877	0.0344989	0.105073	0.0691986	0.0868555	0.0426163	0.049195	0.0482855	0.0230588	0.0245509	0.102569	0.0182917	0.0545021	0.0883209	0.083028	0.0807893	0.093431	0.076588	0.0652977	0.0894056
Tyrosine metabolism	-0.0601128	-0.0669101	-0.0594962	-0.0638446	-0.0609181	-0.112528	-0.0705294	-0.111287	-0.0747972	-0.0330629	-0.0815957	-0.0113298	-0.0421277	-0.0445908	-0.0382148	-0.0763349	-0.0436218	-0.0643599	-0.0763795	-0.0797377	-0.0542878	-0.0889976	-0.089548	-0.0709647	-0.0751905	-0.0811583	-0.0638072	-0.0830322	-0.0648101	-0.0608117	-0.104289	-0.0740663	-0.013433	-0.0688234	-0.088643	-0.0756664	-0.03875	-0.03091	-0.0410915	-0.0759241	-0.0552123	-0.0395101	-0.0568414	-0.0523331	-0.0716077	-0.0577992	-0.105049	-0.0893661	-0.0846824
Ubiquinone and other terpenoid-quinone biosynthesis	0.0700599	0.0985925	0.0671607	0.0734774	0.0857655	0.106074	0.0724566	0.0749949	0.161762	0.185621	0.127144	0.227216	0.178926	0.162299	0.153569	0.131336	0.162768	0.159928	0.108629	0.133653	0.206645	0.128197	0.127341	0.150145	0.11946	0.0981446	0.0762511	0.119895	0.10999	0.143224	0.114122	0.0977895	0.126216	0.109584	0.0934772	0.0944917	0.136228	0.172956	0.0792492	0.0660535	0.139983	0.13543	0.111415	0.12827	0.0815723	0.0791213	0.0815536	0.0955283	0.0567635
Ubiquitin mediated proteolysis	0.260418	0.261534	0.260988	0.261941	0.254142	0.266083	0.257029	0.26869	0.271164	0.252798	0.272433	0.250172	0.269347	0.255791	0.250059	0.269772	0.256427	0.272811	0.270546	0.249514	0.254777	0.260811	0.269749	0.270444	0.254664	0.252568	0.257716	0.262611	0.248428	0.257778	0.263653	0.256117	0.249039	0.25634	0.258643	0.253371	0.246772	0.263212	0.23268	0.254453	0.230975	0.254593	0.262125	0.268135	0.250996	0.249297	0.248611	0.246662	0.265312
Valine	0.215119	0.230042	0.212091	0.200163	0.209613	0.214728	0.246726	0.198127	0.250157	0.239035	0.22814	0.262503	0.228921	0.250829	0.226986	0.201892	0.232798	0.234707	0.197368	0.240733	0.252517	0.207025	0.211917	0.213467	0.244576	0.235172	0.217577	0.225766	0.256958	0.187034	0.20516	0.216294	0.278884	0.228223	0.20024	0.242723	0.233395	0.234762	0.24328	0.205305	0.242523	0.217683	0.228944	0.215529	0.232682	0.220601	0.214488	0.210617	0.215295
Various types of N-glycan biosynthesis	0.184624	0.190104	0.184124	0.188397	0.187723	0.171886	0.173925	0.183103	0.220497	0.255606	0.205333	0.219952	0.212599	0.200594	0.198632	0.171274	0.20845	0.229692	0.210756	0.177871	0.210263	0.198845	0.183092	0.178522	0.181791	0.209518	0.184994	0.176076	0.186358	0.183641	0.197005	0.189379	0.184437	0.16311	0.19596	0.185729	0.182843	0.194728	0.194936	0.190338	0.20016	0.238688	0.168022	0.16016	0.173322	0.183513	0.158243	0.172342	0.167709
Vascular smooth muscle contraction	0.134737	0.0887782	0.130771	0.130834	0.12894	0.0750147	0.138294	0.0731549	0.0757828	0.0794433	0.0897133	0.070872	0.0874737	0.0950129	0.0692051	0.067207	0.0919898	0.0739695	0.0831021	0.110417	0.0712484	0.0781632	0.0753599	0.09521	0.094386	0.101672	0.10013	0.0803885	0.05825	0.0946291	0.0901499	0.122835	0.106951	0.107106	0.0962674	0.123783	0.0772701	0.0616244	0.0996929	0.123734	0.080048	0.104515	0.104418	0.10824	0.124629	0.108218	0.0875925	0.0847267	0.0979105
Vasopressin-regulated water reabsorption	0.321365	0.332509	0.321688	0.339035	0.319383	0.290839	0.321827	0.281073	0.302732	0.255475	0.294399	0.258257	0.276986	0.275391	0.27738	0.287157	0.293649	0.282811	0.294038	0.29453	0.277017	0.30531	0.29295	0.297265	0.300826	0.297789	0.305449	0.296535	0.285625	0.312529	0.284156	0.326067	0.292188	0.308321	0.289413	0.306895	0.277819	0.287542	0.28286	0.317158	0.26413	0.28638	0.311194	0.307903	0.312338	0.30681	0.295938	0.307277	0.302395
VEGF signaling pathway	0.22697	0.189563	0.225383	0.233025	0.2266	0.194643	0.207029	0.218411	0.198901	0.200563	0.207616	0.183018	0.183612	0.200551	0.193004	0.193161	0.204636	0.206813	0.185586	0.209203	0.184273	0.204833	0.19822	0.20361	0.197853	0.218481	0.210038	0.194137	0.17991	0.212146	0.218464	0.217833	0.178444	0.200189	0.210733	0.219134	0.209625	0.19052	0.187245	0.218774	0.194732	0.213164	0.214477	0.206623	0.212432	0.220942	0.192223	0.194958	0.214776
Vibrio cholerae infection	0.32276	0.333916	0.318617	0.33254	0.325414	0.310941	0.321513	0.292777	0.311922	0.317036	0.312525	0.296758	0.319903	0.313622	0.306882	0.304217	0.310283	0.316774	0.306422	0.314719	0.304191	0.314858	0.298846	0.315408	0.318936	0.320937	0.322233	0.305074	0.300751	0.328455	0.315262	0.33287	0.302076	0.311479	0.318334	0.322858	0.312165	0.305749	0.320674	0.326136	0.306049	0.326197	0.316106	0.320634	0.324113	0.316904	0.302683	0.313728	0.313459
Viral carcinogenesis	0.136397	0.168782	0.13781	0.156281	0.144013	0.205994	0.143268	0.185293	0.194622	0.203543	0.201945	0.190411	0.199532	0.184501	0.201865	0.189628	0.194775	0.197364	0.257418	0.161753	0.189154	0.198166	0.186119	0.202717	0.174315	0.183162	0.169217	0.171448	0.188208	0.168347	0.190437	0.16083	0.176739	0.16148	0.173372	0.170859	0.19524	0.20363	0.181779	0.171632	0.165981	0.205564	0.158178	0.191575	0.149051	0.144041	0.159484	0.172474	0.174446
Viral myocarditis	0.156919	0.196431	0.169759	0.167296	0.171805	0.211115	0.207793	0.250602	0.262039	0.324431	0.239024	0.287532	0.271378	0.256699	0.299745	0.190689	0.275885	0.285954	0.254779	0.222432	0.219416	0.2581	0.263109	0.247033	0.22115	0.298542	0.226627	0.241386	0.248052	0.220609	0.264882	0.191418	0.254545	0.160799	0.28002	0.27549	0.26142	0.278106	0.276616	0.253224	0.223121	0.339882	0.157616	0.267465	0.177036	0.141869	0.187991	0.177539	0.220489
Viral protein interaction with cytokine and cytokine receptor	-0.16246	-0.178101	-0.153394	-0.120148	-0.107385	-0.137637	-0.155372	-0.125777	-0.0910279	0.159707	-0.118107	0.065385	-0.104725	-0.0784735	-0.0215853	-0.163747	-0.0227174	-0.00230771	-0.131804	-0.15616	-0.108789	-0.125511	-0.115937	-0.123849	-0.157602	-0.0306011	-0.152096	-0.131477	-0.141161	-0.167738	-0.10716	-0.197107	-0.0399903	-0.144377	-0.109078	-0.0835682	-0.0359811	-0.0310523	-0.0651403	-0.0905845	-0.0951569	0.0392067	-0.109392	-0.0424077	-0.178601	-0.188456	-0.147812	-0.167099	-0.0820813
Vitamin B6 metabolism	0.253166	0.166316	0.237692	0.241462	0.241624	0.161492	0.194739	0.151722	0.149826	0.182206	0.166017	0.210838	0.158762	0.166676	0.210664	0.126275	0.182811	0.155101	0.158288	0.185364	0.166888	0.159017	0.168811	0.161089	0.166066	0.168843	0.187742	0.140992	0.198896	0.196879	0.168996	0.196171	0.19739	0.198614	0.171142	0.171946	0.184632	0.155771	0.172069	0.183694	0.12691	0.159665	0.177201	0.150271	0.16892	0.205088	0.187413	0.164956	0.160362
Vitamin digestion and absorption	-0.0844961	-0.0369232	-0.0883328	-0.0842664	-0.0815379	-0.0802226	-0.0725747	-0.0353151	-0.0553981	-0.00744343	-0.0488262	-0.0206757	-0.0672942	-0.0285425	-0.038324	-0.0718713	-0.038235	-0.0583132	-0.0755786	-0.0348324	-0.0478892	-0.0351885	-0.0604922	-0.0583947	-0.0266252	-0.0534419	-0.0499439	-0.0726162	-0.0431104	-0.0208665	-0.0555821	-0.080059	-0.0311342	-0.0586839	-0.0602716	-0.0584021	-0.0225911	-0.0500583	-0.00963586	-0.0612339	-0.0348814	-0.038149	-0.0779626	-0.0273138	-0.0612212	-0.0773744	-0.053252	-0.0386055	-0.0945257
Wnt signaling pathway	0.129999	0.102517	0.129157	0.137603	0.128708	0.124641	0.126436	0.130427	0.103468	0.0755603	0.116984	0.0724615	0.0933009	0.0976804	0.0917938	0.0885907	0.101881	0.0983339	0.101461	0.111413	0.094596	0.0987083	0.102325	0.0939319	0.108699	0.123556	0.143969	0.118808	0.117066	0.132844	0.119034	0.136265	0.110382	0.132997	0.135245	0.139312	0.106525	0.0948987	0.109122	0.139638	0.101938	0.108647	0.130365	0.114793	0.136521	0.14019	0.131074	0.120727	0.144394
Yersinia infection	0.207756	0.190441	0.213882	0.229718	0.218593	0.20624	0.202978	0.215604	0.224011	0.266659	0.224065	0.235392	0.227659	0.211218	0.235511	0.192661	0.244334	0.252279	0.195704	0.208816	0.18824	0.193796	0.21975	0.219811	0.18819	0.25074	0.2249	0.208848	0.201581	0.184783	0.236333	0.206394	0.217331	0.195765	0.228944	0.230711	0.226099	0.214533	0.227545	0.236413	0.19859	0.283592	0.192636	0.223576	0.196199	0.190127	0.185936	0.192061	0.231028
[truncated: 600 more columns]
