# Supplementary material for: Development and validation of a two glycolysis-related LncRNAs prognostic signature for glioma and in vitro analyses
Source: Cell Div. 2023 Jun 24;18:10. doi: 10.1186/s13008-023-00092-9 (PMC10290322; doi:10.1186/s13008-023-00092-9)
Supplement: Supplementary file 3 — Additional file 3. Differentially expressed lncRNAs screened by multivariate Cox regression analysis. [file 13008_2023_92_MOESM3_ESM.xlsx]

## Sheet: multiCox
id	coef	HR	HR.95L	HR.95H	pvalue
AL390755.1	0.436212	1.54684	1.37936	1.73465	8.59369e-14
FLJ16779	-0.265768	0.766617	0.687346	0.855031	1.82153e-06
