# Supplementary material for: Development and validation of a two glycolysis-related LncRNAs prognostic signature for glioma and in vitro analyses
Source: Cell Div. 2023 Jun 24;18:10. doi: 10.1186/s13008-023-00092-9 (PMC10290322; doi:10.1186/s13008-023-00092-9)
Supplement: Supplementary file 4 — Additional file 4. Genes strongly correlated with AL390755.1 using Pearson correlation analysis. (|coefficient (cor)| ≥ 0.6 and P < 0.05). [file 13008_2023_92_MOESM4_ESM.xlsx]

## Sheet: AL390755.1.correlation
gene	mRNAs	cor	p.value
AL390755.1	AL390755.1	1	0
AL390755.1	FLJ16779	-0.431588	4.03122e-28
AL390755.1	AATK	-0.399965	4.91929e-24
AL390755.1	ABCC3	0.602925	1.40299e-59
AL390755.1	ABCC8	-0.482138	1.28698e-35
AL390755.1	ACTA2	0.347737	3.49281e-18
AL390755.1	ACTL6B	-0.422897	5.91767e-27
AL390755.1	ACTN1	0.542795	1.95945e-46
AL390755.1	ADAM12	0.521993	1.778e-42
AL390755.1	ADCYAP1R1	-0.0356363	0.38797
AL390755.1	ADGRB1	-0.311443	1.02869e-14
AL390755.1	ADGRB3	-0.423874	4.39245e-27
AL390755.1	ADGRE5	0.622614	1.61052e-64
AL390755.1	ADGRV1	-0.355991	4.8778e-19
AL390755.1	ADM	0.541386	3.70661e-46
AL390755.1	AEBP1	0.492901	2.21399e-37
AL390755.1	ALDH5A1	-0.254688	3.57133e-10
AL390755.1	ALDOC	-0.00698425	0.865683
AL390755.1	ALOX5AP	0.537185	2.43567e-45
AL390755.1	AMER2	-0.411581	1.74214e-25
AL390755.1	AMOTL2	-0.362317	1.03702e-19
AL390755.1	ANGPT2	0.531756	2.67034e-44
AL390755.1	ANXA1	0.666389	7.16442e-77
AL390755.1	ANXA2	0.669873	6.04017e-78
AL390755.1	ANXA5	0.262576	9.61226e-11
AL390755.1	APOBEC3C	0.59313	3.01234e-57
AL390755.1	APOL4	0.560822	4.27799e-50
AL390755.1	AQP1	0.190312	3.29512e-06
AL390755.1	AQP5	0.523062	1.1302e-42
AL390755.1	ARAP3	0.576722	1.62451e-53
AL390755.1	ARC	0.371346	1.07078e-20
AL390755.1	ARFGEF3	-0.501603	7.45222e-39
AL390755.1	ARHGDIG	-0.386567	1.97421e-22
AL390755.1	ARL4C	0.388234	1.25845e-22
AL390755.1	ARPP21	-0.614408	2.03347e-62
AL390755.1	ARSD	0.581077	1.74109e-54
AL390755.1	ASF1B	0.360607	1.58149e-19
AL390755.1	ASIC1	-0.369207	1.8454e-20
AL390755.1	ASIC4	-0.374728	4.48934e-21
AL390755.1	ATCAY	-0.287344	1.16637e-12
AL390755.1	ATF3	0.501749	7.03406e-39
AL390755.1	ATOH8	-0.456026	1.374e-31
AL390755.1	ATP1A3	-0.111566	0.00672117
AL390755.1	ATP6V1G2	-0.10648	0.00970782
AL390755.1	ATP8A1	-0.479367	3.57837e-35
AL390755.1	B3GNT7	0.500758	1.04027e-38
AL390755.1	BASP1	-0.0970295	0.0185029
AL390755.1	BCAN	-0.0359896	0.383279
AL390755.1	BCAT1	0.53193	2.4748e-44
AL390755.1	BCL7A	-0.477587	6.869e-35
AL390755.1	BGN	0.457871	7.32309e-32
AL390755.1	BIRC5	0.317959	2.65048e-15
AL390755.1	BMP2	-0.431695	3.89872e-28
AL390755.1	BRINP1	-0.372227	8.54505e-21
AL390755.1	BST2	0.390237	7.30175e-23
AL390755.1	BTBD17	-0.318308	2.4622e-15
AL390755.1	C14orf132	-0.222348	4.94748e-08
AL390755.1	C1QA	0.10112	0.0140808
AL390755.1	C1QB	0.0953899	0.0205904
AL390755.1	C1QL1	-0.102846	0.0125133
AL390755.1	C1R	0.60756	1.03528e-60
AL390755.1	C1RL	0.610296	2.17834e-61
AL390755.1	C1S	0.568939	8.09825e-52
AL390755.1	C21orf62	0.515801	2.37684e-41
AL390755.1	C3	0.223306	4.31916e-08
AL390755.1	C9orf64	0.507147	8.15525e-40
AL390755.1	CA10	-0.449099	1.41113e-30
AL390755.1	CA2	0.380292	1.05078e-21
AL390755.1	CA3	0.505785	1.40969e-39
AL390755.1	CA9	0.456008	1.3825e-31
AL390755.1	CACNG2	-0.552576	2.15543e-48
AL390755.1	CADM2	-0.315551	4.39233e-15
AL390755.1	CALCRL	-0.287208	1.19652e-12
AL390755.1	CALN1	-0.438675	4.25335e-29
AL390755.1	CALU	0.318031	2.61058e-15
AL390755.1	CAMK2A	-0.0573586	0.164455
AL390755.1	CAMSAP3	-0.587468	6.17885e-56
AL390755.1	CAPG	0.569013	7.80513e-52
AL390755.1	CARD16	0.615855	8.7543e-63
AL390755.1	CASKIN1	-0.572188	1.60363e-52
AL390755.1	CAV1	0.531677	2.76496e-44
AL390755.1	CAVIN1	0.548028	1.78725e-47
AL390755.1	CBLN1	-0.576848	1.52359e-53
AL390755.1	CBR1	0.38062	9.63497e-22
AL390755.1	CCDC8	0.444943	5.5643e-30
AL390755.1	CCL2	0.419809	1.50866e-26
AL390755.1	CCN1	0.297206	1.77519e-13
AL390755.1	CCNA2	0.410807	2.18586e-25
AL390755.1	CCNB1	0.407302	6.05645e-25
AL390755.1	CCNB2	0.349873	2.11004e-18
AL390755.1	CD14	0.168745	3.85195e-05
AL390755.1	CD151	0.589226	2.43402e-56
AL390755.1	CD163	0.513989	5.02486e-41
AL390755.1	CD24	-0.203631	6.23517e-07
AL390755.1	CD248	0.50618	1.20316e-39
AL390755.1	CD38	-0.308623	1.83101e-14
AL390755.1	CD44	0.589792	1.80063e-56
AL390755.1	CD58	0.663169	6.84041e-76
AL390755.1	CD63	0.108039	0.00868671
AL390755.1	CD74	0.083518	0.0427484
AL390755.1	CD93	0.437356	6.49098e-29
AL390755.1	CDC20	0.389312	9.39461e-23
AL390755.1	CDCA8	0.380867	9.02736e-22
AL390755.1	CDH20	-0.36698	3.2389e-20
AL390755.1	CDHR1	-0.598621	1.51897e-58
AL390755.1	CDK5R1	-0.249629	8.09893e-10
AL390755.1	CDKN2C	0.435886	1.03728e-28
AL390755.1	CEBPD	0.527767	1.50928e-43
AL390755.1	CELF3	-0.450003	1.04454e-30
AL390755.1	CELF5	-0.526736	2.3525e-43
AL390755.1	CFI	0.560019	6.29721e-50
AL390755.1	CHGA	-0.224487	3.64954e-08
AL390755.1	CHGB	-0.337352	3.83185e-17
AL390755.1	CHI3L1	0.528526	1.08745e-43
AL390755.1	CHI3L2	0.621408	3.30751e-64
AL390755.1	CKS2	0.204455	5.60382e-07
AL390755.1	CLCF1	0.558122	1.56247e-49
AL390755.1	CLEC5A	0.597857	2.30943e-58
AL390755.1	CLIC1	0.641204	1.61192e-69
AL390755.1	CMTM5	-0.366622	3.54404e-20
AL390755.1	CNTN1	-0.151987	0.000213638
AL390755.1	CNTN3	-0.546625	3.41072e-47
AL390755.1	CNTNAP2	-0.465956	4.4348e-33
AL390755.1	COL1A1	0.436311	9.05929e-29
AL390755.1	COL1A2	0.457696	7.77412e-32
AL390755.1	COL3A1	0.440072	2.71316e-29
AL390755.1	COL4A1	0.560807	4.30947e-50
AL390755.1	COL4A2	0.554804	7.55603e-49
AL390755.1	COL5A1	0.415117	6.13934e-26
AL390755.1	COL5A2	0.521387	2.29638e-42
AL390755.1	COL6A2	0.476278	1.10677e-34
AL390755.1	COL8A1	0.497814	3.30212e-38
AL390755.1	CP	0.472129	4.95334e-34
AL390755.1	CPLX1	-0.396929	1.15269e-23
AL390755.1	CPLX2	-0.173359	2.33238e-05
AL390755.1	CPQ	0.557501	2.10141e-49
AL390755.1	CPVL	0.511372	1.47015e-40
AL390755.1	CRLF1	-0.299211	1.19971e-13
AL390755.1	CRTAC1	-0.533673	1.15258e-44
AL390755.1	CRY2	-0.392697	3.72259e-23
AL390755.1	CSDC2	-0.365575	4.60831e-20
AL390755.1	CSMD3	-0.619519	1.01544e-63
AL390755.1	CTHRC1	0.41379	9.09458e-26
AL390755.1	CTTNBP2	-0.524056	7.40662e-43
AL390755.1	CUX2	-0.592549	4.11867e-57
AL390755.1	CXCL10	0.522673	1.33306e-42
AL390755.1	CXCL14	0.265046	6.31593e-11
AL390755.1	CXCL8	0.42796	1.24931e-27
AL390755.1	CXCR4	0.490673	5.19482e-37
AL390755.1	CYTL1	0.485194	4.12062e-36
AL390755.1	DAAM2	-0.185384	5.92924e-06
AL390755.1	DCTD	0.481522	1.61669e-35
AL390755.1	DCX	-0.377041	2.463e-21
AL390755.1	DDIT4L	0.474436	2.15802e-34
AL390755.1	DDN	-0.242984	2.31075e-09
AL390755.1	DEPP1	0.590271	1.39505e-56
AL390755.1	DIRAS3	0.571345	2.44514e-52
AL390755.1	DISP3	-0.566675	2.47624e-51
AL390755.1	DLGAP1	-0.531654	2.79264e-44
AL390755.1	DLL1	-0.302194	6.66173e-14
AL390755.1	DLL3	-0.249169	8.71712e-10
AL390755.1	DMRTA2	0.588122	4.37022e-56
AL390755.1	DNM3	-0.564292	7.954e-51
AL390755.1	DPY19L1	0.504264	2.58943e-39
AL390755.1	DPYD	0.605973	2.54006e-60
AL390755.1	DSCAM	-0.494981	9.92953e-38
AL390755.1	DSCAML1	-0.578284	7.32274e-54
AL390755.1	DUSP26	-0.401242	3.42866e-24
AL390755.1	DUSP5	0.392711	3.70785e-23
AL390755.1	DUSP6	0.49803	3.03476e-38
AL390755.1	EEPD1	-0.347831	3.41657e-18
AL390755.1	EFEMP1	0.403892	1.61356e-24
AL390755.1	EFEMP2	0.605856	2.71309e-60
AL390755.1	EHD2	0.557499	2.10388e-49
AL390755.1	ELFN2	-0.623311	1.06074e-64
AL390755.1	EMILIN1	0.543086	1.71705e-46
AL390755.1	EMILIN2	0.551377	3.77654e-48
AL390755.1	EMILIN3	0.447075	2.75907e-30
AL390755.1	EMP1	0.602868	1.4484e-59
AL390755.1	EMP3	0.700194	5.96114e-88
AL390755.1	EN1	0.492732	2.36262e-37
AL390755.1	ENHO	-0.0848487	0.0395365
AL390755.1	EPHB1	-0.475709	1.36071e-34
AL390755.1	ESM1	0.414703	6.94048e-26
AL390755.1	ETNPPL	-0.195977	1.64574e-06
AL390755.1	EVA1B	0.585507	1.73453e-55
AL390755.1	EVA1C	0.640177	3.10982e-69
AL390755.1	EYA1	-0.438983	3.85245e-29
AL390755.1	F13A1	0.356783	4.02531e-19
AL390755.1	F3	0.402784	2.21347e-24
AL390755.1	FA2H	-0.314265	5.74104e-15
AL390755.1	FABP5	0.601489	3.1183e-59
AL390755.1	FABP7	0.331573	1.39821e-16
AL390755.1	FAIM2	-0.0673219	0.102629
AL390755.1	FAM110B	-0.512857	8.00419e-41
AL390755.1	FAM114A1	0.619742	8.90058e-64
AL390755.1	FAM133A	-0.564607	6.81836e-51
AL390755.1	FAM155A	-0.578435	6.77754e-54
AL390755.1	FAM163B	-0.269487	2.93522e-11
AL390755.1	FAM171A1	-0.219752	7.12897e-08
AL390755.1	FAM181A	0.556303	3.71473e-49
AL390755.1	FAM20C	0.514914	3.43043e-41
AL390755.1	FAM222A	-0.449481	1.24264e-30
AL390755.1	FBLIM1	0.445052	5.36901e-30
AL390755.1	FBLL1	-0.367057	3.17649e-20
AL390755.1	FBLN1	0.332539	1.12838e-16
AL390755.1	FBLN5	0.480784	2.12363e-35
AL390755.1	FBXL16	-0.163547	6.67382e-05
AL390755.1	FBXO17	0.577031	1.38787e-53
AL390755.1	FCER1G	0.431547	4.08354e-28
AL390755.1	FCGBP	0.507876	6.07754e-40
AL390755.1	FCGR2A	0.536521	3.27325e-45
AL390755.1	FCGR3A	0.486678	2.36024e-36
AL390755.1	FCHSD2	-0.266643	4.80232e-11
AL390755.1	FERMT1	-0.47347	3.0587e-34
AL390755.1	FGF12	-0.531895	2.5132e-44
AL390755.1	FGFRL1	0.527823	1.47314e-43
AL390755.1	FKBP10	0.525249	4.45064e-43
AL390755.1	FKBP9	0.552561	2.17056e-48
AL390755.1	FLNA	0.325124	5.74013e-16
AL390755.1	FLNC	0.483282	8.41276e-36
AL390755.1	FLRT1	-0.593345	2.68303e-57
AL390755.1	FMOD	0.565207	5.08563e-51
AL390755.1	FN1	0.503377	3.68711e-39
AL390755.1	FOSL1	0.528199	1.25257e-43
AL390755.1	FOXJ1	0.377016	2.47915e-21
AL390755.1	FSTL1	0.574574	4.82836e-53
AL390755.1	FSTL5	-0.522494	1.43825e-42
AL390755.1	FTL	-0.00373875	0.927854
AL390755.1	FUCA2	0.59252	4.18356e-57
AL390755.1	FUT9	-0.563782	1.01956e-50
AL390755.1	FXYD6	-0.0823582	0.0457246
AL390755.1	G0S2	0.547175	2.6479e-47
AL390755.1	GABBR1	-0.154332	0.000169823
AL390755.1	GABBR2	-0.269904	2.72927e-11
AL390755.1	GABRA3	-0.516665	1.66018e-41
AL390755.1	GABRB3	-0.560281	5.55201e-50
AL390755.1	GABRD	-0.280703	3.97748e-12
AL390755.1	GABRG1	-0.47783	6.28463e-35
AL390755.1	GABRG2	-0.319447	1.93534e-15
AL390755.1	GADD45A	0.646676	4.66764e-71
AL390755.1	GALNT13	-0.535007	6.39904e-45
AL390755.1	GALNT9	-0.512915	7.81467e-41
AL390755.1	GAP43	0.0806199	0.0505101
AL390755.1	GBP1	0.601475	3.14352e-59
AL390755.1	GBP2	0.481748	1.48682e-35
AL390755.1	GDAP1L1	-0.409394	3.3008e-25
AL390755.1	GDF15	0.629752	2.1258e-66
AL390755.1	GFRA1	-0.54065	5.16493e-46
AL390755.1	GGTA1	-0.349465	2.32416e-18
AL390755.1	GLUD1	-0.0402597	0.329365
AL390755.1	GNAL	-0.633524	2.06196e-67
AL390755.1	GNAO1	-0.221735	5.39537e-08
AL390755.1	GNG12	0.599844	7.74729e-59
AL390755.1	GNG5	0.392772	3.64626e-23
AL390755.1	GPNMB	0.513819	5.38854e-41
AL390755.1	GPR158	-0.417486	3.03076e-26
AL390755.1	GPR17	-0.428436	1.07782e-27
AL390755.1	GPR27	-0.450532	8.75485e-31
AL390755.1	GPX7	0.538289	1.48893e-45
AL390755.1	GPX8	0.5709	3.05425e-52
AL390755.1	GRIA2	-0.413932	8.72025e-26
AL390755.1	GRIA4	-0.405598	9.89748e-25
AL390755.1	GRIK2	-0.466702	3.41065e-33
AL390755.1	GRIN1	-0.293467	3.6557e-13
AL390755.1	H2BC12	0.352304	1.18359e-18
AL390755.1	HES5	-0.272153	1.84044e-11
AL390755.1	HES6	-0.0904818	0.0281083
AL390755.1	HILPDA	0.506616	1.00972e-39
AL390755.1	HIP1R	-0.415544	5.40814e-26
AL390755.1	HIPK2	-0.231737	1.27208e-08
AL390755.1	HLA-A	0.0954375	0.0205271
AL390755.1	HLA-B	0.109171	0.00800619
AL390755.1	HLA-DMA	0.481011	1.95296e-35
AL390755.1	HLA-DMB	0.496444	5.63203e-38
AL390755.1	HLA-DOA	0.461184	2.34148e-32
AL390755.1	HLA-DPA1	0.502467	5.29142e-39
AL390755.1	HLA-DPB1	0.411993	1.54415e-25
AL390755.1	HLA-DQA1	0.48023	2.60512e-35
AL390755.1	HLA-DQA2	0.351192	1.54312e-18
AL390755.1	HLA-DQB1	0.453571	3.15674e-31
AL390755.1	HLA-DRA	0.110426	0.00730774
AL390755.1	HLA-DRB1	0.212041	2.05441e-07
AL390755.1	HLA-DRB5	0.290361	6.6083e-13
AL390755.1	HMOX1	0.277095	7.64248e-12
AL390755.1	HMX1	-0.488633	1.12795e-36
AL390755.1	HOPX	0.452089	5.19717e-31
AL390755.1	HOXA5	0.533213	1.41042e-44
AL390755.1	HOXB2	0.438844	4.02911e-29
AL390755.1	HOXB7	0.486212	2.81245e-36
AL390755.1	HOXC10	0.493435	1.80359e-37
AL390755.1	HPCAL4	-0.1982	1.24628e-06
AL390755.1	HPSE2	-0.426397	2.02483e-27
AL390755.1	HRH3	-0.515888	2.29218e-41
AL390755.1	HSPA6	0.450887	7.77489e-31
AL390755.1	HSPB1	0.380848	9.07291e-22
AL390755.1	HSPB6	0.537138	2.48789e-45
AL390755.1	IBSP	0.450731	8.19027e-31
AL390755.1	ICAM1	0.466114	4.19434e-33
AL390755.1	IFI6	0.174146	2.1383e-05
AL390755.1	IFITM10	-0.559696	7.35421e-50
AL390755.1	IFITM3	0.228936	1.91949e-08
AL390755.1	IGF2BP2	0.484285	5.78752e-36
AL390755.1	IGFBP2	0.656624	6.16255e-74
AL390755.1	IGFBP3	0.538955	1.1055e-45
AL390755.1	IGFBP4	0.376839	2.596e-21
AL390755.1	IGFBP5	0.410268	2.55858e-25
AL390755.1	IGFBP7	0.173588	2.27409e-05
AL390755.1	IL13RA2	0.502783	4.66812e-39
AL390755.1	IL1RAP	0.480409	2.43846e-35
AL390755.1	INA	-0.258261	1.98165e-10
AL390755.1	IQGAP1	0.574714	4.49863e-53
AL390755.1	IQGAP2	0.52843	1.13363e-43
AL390755.1	ISG15	0.340381	1.92347e-17
AL390755.1	ITGA3	0.517815	1.02869e-41
AL390755.1	ITGA5	0.592697	3.80282e-57
AL390755.1	ITGA7	0.543572	1.37686e-46
AL390755.1	JPH3	-0.613497	3.44902e-62
AL390755.1	JPH4	-0.399725	5.26216e-24
AL390755.1	KCNB1	-0.517665	1.09503e-41
AL390755.1	KCND2	-0.389954	7.88685e-23
AL390755.1	KCNE4	0.526591	2.50377e-43
AL390755.1	KCNIP2	-0.432878	2.68786e-28
AL390755.1	KCNIP3	-0.625871	2.26696e-65
AL390755.1	KCNJ11	-0.428025	1.22427e-27
AL390755.1	KCNJ9	-0.408922	3.78642e-25
AL390755.1	KCNK3	-0.461073	2.43311e-32
AL390755.1	KCNN3	-0.247821	1.0806e-09
AL390755.1	KCNQ2	-0.341317	1.55205e-17
AL390755.1	KDELR3	0.500299	1.24631e-38
AL390755.1	KIAA0040	0.641593	1.25598e-69
AL390755.1	KIF1A	-0.0932785	0.0235781
AL390755.1	KIF21B	-0.563649	1.08816e-50
AL390755.1	KIF2C	0.362658	9.53014e-20
AL390755.1	KIF4A	0.371131	1.1311e-20
AL390755.1	KIF5A	-0.0306841	0.457315
AL390755.1	KLHDC8A	0.489322	8.68589e-37
AL390755.1	KLHL32	-0.4822	1.25739e-35
AL390755.1	KLRC2	-0.155678	0.000148642
AL390755.1	L1CAM	-0.329817	2.06077e-16
AL390755.1	LAMB1	0.413602	9.61235e-26
AL390755.1	LAMC1	0.558331	1.41434e-49
AL390755.1	LCNL1	-0.37566	3.52656e-21
AL390755.1	LDHA	0.420709	1.1496e-26
AL390755.1	LGALS1	0.265979	5.38291e-11
AL390755.1	LGALS3	0.604292	6.53157e-60
AL390755.1	LGR6	0.426326	2.06933e-27
AL390755.1	LHFPL3	-0.168184	4.09051e-05
AL390755.1	LHFPL4	-0.411409	1.83263e-25
AL390755.1	LIF	0.515488	2.70586e-41
AL390755.1	LIMS2	-0.406689	7.22756e-25
AL390755.1	LINC00634	-0.50602	1.28307e-39
AL390755.1	LINC00672	-0.435078	1.34096e-28
AL390755.1	LINGO1	-0.238318	4.73796e-09
AL390755.1	LOX	0.487529	1.71251e-36
AL390755.1	LOXL1	0.493681	1.64017e-37
AL390755.1	LOXL2	0.498925	2.13809e-38
AL390755.1	LRATD2	-0.3418	1.3889e-17
AL390755.1	LRIG1	-0.0958387	0.0199995
AL390755.1	LRRN4CL	0.577516	1.08408e-53
AL390755.1	LSP1	0.554753	7.74078e-49
AL390755.1	LTF	0.547148	2.68104e-47
AL390755.1	LUM	0.419088	1.87438e-26
AL390755.1	LUZP2	-0.493029	2.10807e-37
AL390755.1	LY96	0.495477	8.19579e-38
AL390755.1	LYZ	0.476818	9.09331e-35
AL390755.1	MACROH2A2	-0.308515	1.8717e-14
AL390755.1	MAOB	0.191965	2.69668e-06
AL390755.1	MAP1LC3C	0.525985	3.248e-43
AL390755.1	MAP2	-0.098479	0.0168138
AL390755.1	MAP3K7CL	0.619949	7.87527e-64
AL390755.1	MAPK8IP2	-0.301413	7.77603e-14
AL390755.1	MAPT	-0.220526	6.39604e-08
AL390755.1	MARCHF8	-0.425789	2.44195e-27
AL390755.1	MARVELD1	0.530633	4.3591e-44
AL390755.1	MAST1	-0.4708	7.96955e-34
AL390755.1	MBP	-0.0596963	0.147896
AL390755.1	MCAM	0.46518	5.82344e-33
AL390755.1	MCUB	0.67939	5.8976e-81
AL390755.1	MDK	0.454493	2.31153e-31
AL390755.1	MEGF11	-0.440972	2.02851e-29
AL390755.1	MEOX2	0.601959	2.40165e-59
AL390755.1	MEST	0.351993	1.27494e-18
AL390755.1	METTL7B	0.708664	5.63298e-91
AL390755.1	MFAP4	0.430834	5.10555e-28
AL390755.1	MGP	0.496893	4.72954e-38
AL390755.1	MMD2	-0.445585	4.50711e-30
AL390755.1	MMP14	0.537535	2.08496e-45
AL390755.1	MMP9	0.46883	1.60702e-33
AL390755.1	MN1	-0.593081	3.09354e-57
AL390755.1	MOBP	-0.20179	7.90147e-07
AL390755.1	MOXD1	0.516787	1.57804e-41
AL390755.1	MRC2	0.540501	5.52359e-46
AL390755.1	MS4A6A	0.489544	7.98607e-37
AL390755.1	MSN	0.53572	4.66882e-45
AL390755.1	MSR1	0.554959	7.02061e-49
AL390755.1	MT1E	0.361397	1.3016e-19
AL390755.1	MT1M	0.501246	8.57889e-39
AL390755.1	MTURN	-0.0658219	0.110535
AL390755.1	MYBL2	0.310943	1.13996e-14
AL390755.1	MYD88	0.561736	2.75193e-50
AL390755.1	MYH7	-0.437111	7.01891e-29
AL390755.1	MYL12A	0.650228	4.50293e-72
AL390755.1	MYT1	-0.444427	6.58888e-30
AL390755.1	NALCN	-0.521263	2.41995e-42
AL390755.1	NAMPT	0.609843	2.82323e-61
AL390755.1	NAP1L2	-0.261005	1.25293e-10
AL390755.1	NAP1L3	-0.168354	4.01714e-05
AL390755.1	NDN	-0.239568	3.91477e-09
AL390755.1	NDRG2	-0.0359682	0.383563
AL390755.1	NECAB2	-0.505702	1.45735e-39
AL390755.1	NET1	-0.415551	5.39616e-26
AL390755.1	NEU4	-0.398435	7.56213e-24
AL390755.1	NGFR	0.428216	1.15391e-27
AL390755.1	NIBAN1	0.554677	8.02282e-49
AL390755.1	NKAIN1	-0.418352	2.33825e-26
AL390755.1	NKAIN4	-0.109735	0.00768542
AL390755.1	NKD1	-0.548271	1.59745e-47
AL390755.1	NMNAT2	-0.358879	2.41571e-19
AL390755.1	NNMT	0.59299	3.24767e-57
AL390755.1	NOG	-0.550413	5.91853e-48
AL390755.1	NPNT	0.517492	1.17703e-41
AL390755.1	NPPA	-0.241384	2.96102e-09
AL390755.1	NRG3	-0.506085	1.2498e-39
AL390755.1	NRSN1	-0.419576	1.61853e-26
AL390755.1	NRXN1	-0.454871	2.03379e-31
AL390755.1	NSG2	-0.242146	2.63167e-09
AL390755.1	NTN4	-0.427624	1.38619e-27
AL390755.1	NTNG2	-0.645246	1.18577e-70
AL390755.1	NTRK2	-0.0871943	0.0343719
AL390755.1	NTSR2	-0.233216	1.02139e-08
AL390755.1	NUSAP1	0.153465	0.000184945
AL390755.1	NXPH1	-0.353411	9.08145e-19
AL390755.1	OAS1	0.470928	7.61248e-34
AL390755.1	OCIAD2	0.553816	1.20386e-48
AL390755.1	OLFML3	0.452806	4.08447e-31
AL390755.1	OLIG1	-0.0515998	0.21113
AL390755.1	OLIG2	-0.0747667	0.0697978
AL390755.1	OMG	-0.312939	7.55678e-15
AL390755.1	OPHN1	-0.536941	2.71559e-45
AL390755.1	OSMR	0.628156	5.6466e-66
AL390755.1	OTOS	0.396736	1.21642e-23
AL390755.1	PACSIN1	-0.153584	0.0001828
AL390755.1	PBK	0.250366	7.19649e-10
AL390755.1	PCDH15	-0.581539	1.37111e-54
AL390755.1	PCOLCE	0.497896	3.19854e-38
AL390755.1	PDE2A	-0.454864	2.03883e-31
AL390755.1	PDGFA	0.543952	1.15829e-46
AL390755.1	PDIA4	0.345295	6.18399e-18
AL390755.1	PDLIM1	0.561723	2.76886e-50
AL390755.1	PDLIM3	0.562395	2.00013e-50
AL390755.1	PDLIM4	0.587481	6.13626e-56
AL390755.1	PDPN	0.655139	1.68477e-73
AL390755.1	PDZD4	-0.160047	9.5739e-05
AL390755.1	PGAP4	-0.464112	8.46278e-33
AL390755.1	PHACTR3	-0.484242	5.88311e-36
AL390755.1	PHYHIPL	-0.185126	6.11191e-06
AL390755.1	PI3	0.426759	1.81099e-27
AL390755.1	PID1	-0.42638	2.03554e-27
AL390755.1	PIMREG	0.291976	4.86135e-13
AL390755.1	PINLYP	0.620103	7.18439e-64
AL390755.1	PIPOX	0.56693	2.18408e-51
AL390755.1	PKIB	0.591553	7.03017e-57
AL390755.1	PLA2G2A	0.481633	1.55166e-35
AL390755.1	PLA2G5	0.570198	4.33383e-52
AL390755.1	PLAT	0.582342	9.04609e-55
AL390755.1	PLAU	0.535186	5.91292e-45
AL390755.1	PLAUR	0.542989	1.79404e-46
AL390755.1	PLEKHA4	0.555014	6.84309e-49
AL390755.1	PLIN2	0.554353	9.34741e-49
AL390755.1	PLP1	-0.00664583	0.872134
AL390755.1	PLP2	0.65366	4.56283e-73
AL390755.1	PLPPR1	-0.358612	2.57894e-19
AL390755.1	PLPPR3	-0.529587	6.86847e-44
AL390755.1	PLSCR1	0.595357	9.03256e-58
AL390755.1	POSTN	0.516507	1.77318e-41
AL390755.1	PPIC	0.610719	1.70937e-61
AL390755.1	PPM1L	-0.52542	4.13603e-43
AL390755.1	PPP2R2C	-0.300044	1.01869e-13
AL390755.1	PRLHR	-0.447161	2.68189e-30
AL390755.1	PRR36	-0.468692	1.68768e-33
AL390755.1	PRSS35	-0.491615	3.62572e-37
AL390755.1	PSD	-0.383343	4.68134e-22
AL390755.1	PSRC1	0.556238	3.83242e-49
AL390755.1	PTGFRN	0.489179	9.17215e-37
AL390755.1	PTPRT	-0.561306	3.38761e-50
AL390755.1	PTTG1	0.380974	8.77597e-22
AL390755.1	PTX3	0.578086	8.10085e-54
AL390755.1	PYGL	0.630009	1.81469e-66
AL390755.1	RAB32	0.591057	9.16895e-57
AL390755.1	RAB34	0.623446	9.77982e-65
AL390755.1	RAB36	0.37917	1.41131e-21
AL390755.1	RAB42	0.600389	5.73534e-59
AL390755.1	RAP2A	-0.209059	3.06151e-07
AL390755.1	RAPGEF4	-0.394952	1.99747e-23
AL390755.1	RARRES2	0.549543	8.86606e-48
AL390755.1	RASGEF1C	-0.55422	9.9513e-49
AL390755.1	RASGRF1	-0.53261	1.83752e-44
AL390755.1	RASL10A	-0.559943	6.53145e-50
AL390755.1	RBP1	0.572052	1.71742e-52
AL390755.1	RCOR2	-0.279107	5.31638e-12
AL390755.1	RDH10	0.533271	1.3751e-44
AL390755.1	REPS2	-0.615295	1.21382e-62
AL390755.1	RGR	-0.476884	8.87713e-35
AL390755.1	RGS11	-0.44705	2.78211e-30
AL390755.1	RGS16	0.505422	1.63052e-39
AL390755.1	RHBDL3	-0.356129	4.7176e-19
AL390755.1	RHOJ	0.560832	4.25715e-50
AL390755.1	RIPPLY2	-0.537893	1.77683e-45
AL390755.1	RNASE2	0.501722	7.10755e-39
AL390755.1	RPL39L	0.40158	3.11579e-24
AL390755.1	RPRM	-0.360422	1.65514e-19
AL390755.1	RRM2	0.314436	5.53985e-15
AL390755.1	RTN1	-0.106506	0.00969001
AL390755.1	RTP5	-0.471292	6.68501e-34
AL390755.1	RUNDC3A	-0.27776	6.78054e-12
AL390755.1	S100A10	0.442891	1.08795e-29
AL390755.1	S100A11	0.481245	1.79083e-35
AL390755.1	S100A13	0.434662	1.52982e-28
AL390755.1	S100A3	0.538407	1.41292e-45
AL390755.1	S100A4	0.630974	1.0019e-66
AL390755.1	S100A6	0.181715	9.091e-06
AL390755.1	S100A8	0.429834	6.97749e-28
AL390755.1	S100A9	0.460541	2.9242e-32
AL390755.1	SAA1	0.486209	2.81501e-36
AL390755.1	SCD	-0.0161608	0.695498
AL390755.1	SCG3	-0.0829814	0.0441043
AL390755.1	SCN3A	-0.49381	1.56091e-37
AL390755.1	SCN3B	-0.400039	4.81756e-24
AL390755.1	SCRT1	-0.518113	9.081e-42
AL390755.1	SDC1	0.391566	5.07737e-23
AL390755.1	SDC4	0.336782	4.35906e-17
AL390755.1	SEC61G	0.531006	3.70475e-44
AL390755.1	SEL1L3	0.339121	2.56457e-17
AL390755.1	SELL	-0.144512	0.000434432
AL390755.1	SEMA6B	-0.525631	3.7795e-43
AL390755.1	SEPTIN3	-0.118508	0.00397484
AL390755.1	SERPINA1	0.529163	8.25547e-44
AL390755.1	SERPINA5	0.539116	1.02881e-45
AL390755.1	SERPINE1	0.584223	3.39751e-55
AL390755.1	SERPING1	0.558893	1.08071e-49
AL390755.1	SERPINH1	0.620649	5.19809e-64
AL390755.1	SEZ6L	-0.225041	3.37135e-08
AL390755.1	SFRP2	-0.473938	2.58356e-34
AL390755.1	SFRP4	0.535047	6.28693e-45
AL390755.1	SH3GL2	-0.235277	7.5056e-09
AL390755.1	SHD	-0.341165	1.60697e-17
AL390755.1	SHISA7	-0.543437	1.46387e-46
AL390755.1	SHISAL1	-0.494518	1.1875e-37
AL390755.1	SHOX2	0.57795	8.68683e-54
AL390755.1	SLC11A1	0.519815	4.45212e-42
AL390755.1	SLC17A7	-0.115039	0.00518553
AL390755.1	SLC1A1	-0.484935	4.54047e-36
AL390755.1	SLC1A4	-0.184782	6.36335e-06
AL390755.1	SLC22A6	-0.484375	5.59612e-36
AL390755.1	SLC25A27	-0.51093	1.76069e-40
AL390755.1	SLC25A48	-0.435249	1.26979e-28
AL390755.1	SLC2A10	0.525652	3.74589e-43
AL390755.1	SLC43A3	0.597018	3.65479e-58
AL390755.1	SLC6A1	-0.141421	0.000576984
AL390755.1	SLC7A14	-0.449456	1.25307e-30
AL390755.1	SLC8A2	-0.459593	4.05517e-32
AL390755.1	SLCO1A2	-0.391876	4.66368e-23
AL390755.1	SLIT1	-0.326656	4.11596e-16
AL390755.1	SLITRK1	-0.501193	8.76233e-39
AL390755.1	SLN	0.397849	8.9125e-24
AL390755.1	SMIM18	-0.520069	4.00233e-42
AL390755.1	SMIM3	0.656416	7.10016e-74
AL390755.1	SMOC1	-0.163381	6.79054e-05
AL390755.1	SMPD3	-0.599715	8.31793e-59
AL390755.1	SNAP25	-0.0063699	0.8774
AL390755.1	SNAP91	-0.406268	8.16059e-25
AL390755.1	SNCB	-0.10827	0.00854351
AL390755.1	SNCG	-0.136923	0.000863284
AL390755.1	SNX22	-0.378604	1.63725e-21
AL390755.1	SOCS2	0.556761	2.98939e-49
AL390755.1	SOCS3	0.513446	6.28398e-41
AL390755.1	SOD2	0.556741	3.01752e-49
AL390755.1	SOD3	0.560649	4.64944e-50
AL390755.1	SOX8	-0.122314	0.00294586
AL390755.1	SPHKAP	-0.536645	3.09695e-45
AL390755.1	SPINK8	0.553717	1.26102e-48
AL390755.1	SPOCD1	0.582046	1.0547e-54
AL390755.1	SPON1	-0.179028	1.23666e-05
AL390755.1	SPP1	0.150662	0.00024287
AL390755.1	SPRY1	0.584886	2.40146e-55
AL390755.1	SPRY2	0.477109	8.17616e-35
AL390755.1	SPRY4	0.518619	7.35136e-42
AL390755.1	SPTBN2	-0.466073	4.2559e-33
AL390755.1	SRPX2	0.628389	4.89751e-66
AL390755.1	SSTR1	-0.543558	1.38579e-46
AL390755.1	SSTR2	-0.497425	3.84397e-38
AL390755.1	ST8SIA3	-0.508915	3.99251e-40
AL390755.1	STAC	0.511343	1.48734e-40
AL390755.1	STEAP3	0.643345	4.06638e-70
AL390755.1	STOX1	-0.406913	6.77643e-25
AL390755.1	STUM	-0.403511	1.79882e-24
AL390755.1	STX1B	-0.306543	2.79037e-14
AL390755.1	SULF2	-0.208676	3.2212e-07
AL390755.1	SUSD5	-0.34784	3.40953e-18
AL390755.1	SVOP	-0.45055	8.70175e-31
AL390755.1	SYN1	-0.131974	0.0013266
AL390755.1	SYP	-0.0987328	0.0165323
AL390755.1	SYT4	-0.255423	3.16652e-10
AL390755.1	TAGLN	0.395636	1.65212e-23
AL390755.1	TAGLN2	0.645924	7.62673e-71
AL390755.1	TCEA3	0.531615	2.83991e-44
AL390755.1	TCEAL2	-0.13778	0.000800208
AL390755.1	TCIM	0.457175	9.28791e-32
AL390755.1	TEAD2	0.516557	1.73693e-41
AL390755.1	TEAD3	0.615933	8.36258e-63
AL390755.1	TEF	-0.348763	2.74346e-18
AL390755.1	TENT5A	0.607599	1.01273e-60
AL390755.1	TF	-0.0997199	0.0154766
AL390755.1	TGFB2	0.497958	3.12197e-38
AL390755.1	TGFBI	0.441473	1.72453e-29
AL390755.1	TGIF1	0.624192	6.24506e-65
AL390755.1	THBS1	0.331623	1.38282e-16
AL390755.1	TIMP1	0.650731	3.22569e-72
AL390755.1	TJP2	-0.255403	3.17675e-10
AL390755.1	TK1	0.328959	2.48854e-16
AL390755.1	TLCD3B	-0.540168	6.41468e-46
AL390755.1	TM4SF1	0.45872	5.47427e-32
AL390755.1	TMBIM1	0.556305	3.71194e-49
AL390755.1	TMEFF2	-0.520346	3.56166e-42
AL390755.1	TMEM100	-0.407566	5.61114e-25
AL390755.1	TMEM106C	0.45145	6.43867e-31
AL390755.1	TMEM151B	-0.445399	4.79217e-30
AL390755.1	TMEM158	0.451118	7.19751e-31
AL390755.1	TMEM176A	0.511884	1.19248e-40
AL390755.1	TMEM176B	0.509641	2.97488e-40
AL390755.1	TMEM179	-0.416999	3.50536e-26
AL390755.1	TMSB10	0.0229947	0.577559
AL390755.1	TMSB4X	0.0358618	0.384972
AL390755.1	TNC	0.500054	1.37267e-38
AL390755.1	TNFAIP6	0.63076	1.1431e-66
AL390755.1	TNFRSF11B	0.558267	1.45779e-49
AL390755.1	TNFRSF12A	0.684106	1.72363e-82
AL390755.1	TNFRSF19	0.56132	3.3651e-50
AL390755.1	TNFRSF1A	0.668487	1.62178e-77
AL390755.1	TNK2	-0.447656	2.27725e-30
AL390755.1	TNR	-0.312073	9.03554e-15
AL390755.1	TOP2A	0.117866	0.00417739
AL390755.1	TOX	-0.395758	1.59708e-23
AL390755.1	TPM4	0.350994	1.6172e-18
AL390755.1	TPPP	-0.138355	0.000760304
AL390755.1	TPX2	0.167417	4.43969e-05
AL390755.1	TRIM67	-0.372899	7.19298e-21
AL390755.1	TRIP6	0.615381	1.15459e-62
AL390755.1	TSPOAP1	-0.546247	4.05625e-47
AL390755.1	TSTD1	0.466435	3.74651e-33
AL390755.1	TUB	-0.518456	7.86795e-42
AL390755.1	TUBA1C	0.646645	4.76176e-71
AL390755.1	TUBB4A	-0.0525219	0.203074
AL390755.1	TUBB6	0.527473	1.71281e-43
AL390755.1	TYMP	0.495409	8.41387e-38
AL390755.1	TYMS	0.344476	7.48214e-18
AL390755.1	TYROBP	0.188708	3.99612e-06
AL390755.1	UBE2C	0.213772	1.62554e-07
AL390755.1	UBE2S	0.39715	1.08356e-23
AL390755.1	UGT8	-0.343618	9.12986e-18
AL390755.1	UNC13A	-0.379023	1.46694e-21
AL390755.1	UNC5A	-0.489981	6.76184e-37
AL390755.1	UNC79	-0.540894	4.62739e-46
AL390755.1	UPP1	0.584885	2.40288e-55
AL390755.1	USH1C	-0.387129	1.69672e-22
AL390755.1	VAMP5	0.540073	6.69398e-46
AL390755.1	VASN	0.549676	8.33451e-48
AL390755.1	VAT1L	-0.345063	6.52822e-18
AL390755.1	VAV3	0.57337	8.86074e-53
AL390755.1	VEGFA	0.536676	3.05478e-45
AL390755.1	VEPH1	-0.357744	3.18693e-19
AL390755.1	VIM	0.204629	5.47812e-07
AL390755.1	VIPR2	-0.4607	2.76847e-32
AL390755.1	VSTM2A	-0.464561	7.23339e-33
AL390755.1	VSTM2B	-0.533137	1.45835e-44
AL390755.1	WEE1	0.539972	7.00718e-46
AL390755.1	WNT7B	-0.564448	7.37009e-51
AL390755.1	XKR8	0.60464	5.37339e-60
AL390755.1	ZDHHC22	-0.338629	2.86824e-17
AL390755.1	ZNF488	-0.475745	1.34306e-34
AL390755.1	ZYX	0.341365	1.53504e-17
