# Supplementary material for: Development and validation of a two glycolysis-related LncRNAs prognostic signature for glioma and in vitro analyses
Source: Cell Div. 2023 Jun 24;18:10. doi: 10.1186/s13008-023-00092-9 (PMC10290322; doi:10.1186/s13008-023-00092-9)
Supplement: Supplementary file 5 — Additional file 5. Genes strongly correlated with FLJ16779 using Pearson correlation analysis. (|coefficient (cor)| ≥ 0.6 and P < 0.05) [file 13008_2023_92_MOESM5_ESM.xlsx]

## Sheet: FLJ16779.correlation
gene	mRNAs	cor	p.value
FLJ16779	AL390755.1	-0.431588	4.03122e-28
FLJ16779	FLJ16779	1	0
FLJ16779	AATK	0.583713	4.43342e-55
FLJ16779	ABCC3	-0.571744	2.00383e-52
FLJ16779	ABCC8	0.497782	3.34353e-38
FLJ16779	ACTA2	-0.215558	1.27393e-07
FLJ16779	ACTL6B	0.468182	2.02218e-33
FLJ16779	ACTN1	-0.460887	2.59531e-32
FLJ16779	ADAM12	-0.691066	8.27602e-85
FLJ16779	ADCYAP1R1	0.317388	2.9889e-15
FLJ16779	ADGRB1	0.4835	7.75787e-36
FLJ16779	ADGRB3	0.584353	3.17317e-55
FLJ16779	ADGRE5	-0.54574	5.11786e-47
FLJ16779	ADGRV1	0.594941	1.13178e-57
FLJ16779	ADM	-0.612659	5.60134e-62
FLJ16779	AEBP1	-0.315412	4.52081e-15
FLJ16779	ALDH5A1	0.522229	1.6088e-42
FLJ16779	ALDOC	0.282721	2.74923e-12
FLJ16779	ALOX5AP	-0.426611	1.89578e-27
FLJ16779	AMER2	0.656255	7.91899e-74
FLJ16779	AMOTL2	0.521583	2.11444e-42
FLJ16779	ANGPT2	-0.537261	2.35505e-45
FLJ16779	ANXA1	-0.616483	6.06347e-63
FLJ16779	ANXA2	-0.629893	1.94882e-66
FLJ16779	ANXA5	0.0249226	0.546068
FLJ16779	APOBEC3C	-0.536302	3.60669e-45
FLJ16779	APOL4	-0.418953	1.95196e-26
FLJ16779	AQP1	0.163517	6.69457e-05
FLJ16779	AQP5	-0.506963	8.78305e-40
FLJ16779	ARAP3	-0.561316	3.37095e-50
FLJ16779	ARC	-0.244729	1.75982e-09
FLJ16779	ARFGEF3	0.598469	1.65165e-58
FLJ16779	ARHGDIG	0.426514	1.95289e-27
FLJ16779	ARL4C	-0.376117	3.13258e-21
FLJ16779	ARPP21	0.613611	3.22924e-62
FLJ16779	ARSD	-0.597243	3.23266e-58
FLJ16779	ASF1B	-0.394437	2.30369e-23
FLJ16779	ASIC1	0.53081	4.0357e-44
FLJ16779	ASIC4	0.462275	1.60469e-32
FLJ16779	ATCAY	0.502679	4.86547e-39
FLJ16779	ATF3	-0.396005	1.49104e-23
FLJ16779	ATOH8	0.498628	2.4023e-38
FLJ16779	ATP1A3	0.357689	3.22974e-19
FLJ16779	ATP6V1G2	0.37662	2.74813e-21
FLJ16779	ATP8A1	0.608559	5.87071e-61
FLJ16779	B3GNT7	-0.448725	1.59784e-30
FLJ16779	BASP1	0.320898	1.42209e-15
FLJ16779	BCAN	0.209485	2.89311e-07
FLJ16779	BCAT1	-0.57622	2.09726e-53
FLJ16779	BCL7A	0.62307	1.22525e-64
FLJ16779	BGN	-0.401133	3.53645e-24
FLJ16779	BIRC5	-0.306168	3.00924e-14
FLJ16779	BMP2	0.554689	7.976e-49
FLJ16779	BRINP1	0.456507	1.16662e-31
FLJ16779	BST2	-0.180949	9.9297e-06
FLJ16779	BTBD17	0.59983	7.80899e-59
FLJ16779	C14orf132	0.50714	8.1767e-40
FLJ16779	C1QA	0.121877	0.00305015
FLJ16779	C1QB	0.143955	0.000457395
FLJ16779	C1QL1	0.285774	1.56335e-12
FLJ16779	C1R	-0.474988	1.76767e-34
FLJ16779	C1RL	-0.562321	2.07324e-50
FLJ16779	C1S	-0.445095	5.29367e-30
FLJ16779	C21orf62	-0.408809	3.91287e-25
FLJ16779	C3	0.0407505	0.323497
FLJ16779	C9orf64	-0.540915	4.58306e-46
FLJ16779	CA10	0.458211	6.51777e-32
FLJ16779	CA2	-0.178985	1.2428e-05
FLJ16779	CA3	-0.449522	1.22618e-30
FLJ16779	CA9	-0.551749	3.17399e-48
FLJ16779	CACNG2	0.427895	1.2747e-27
FLJ16779	CADM2	0.563242	1.3263e-50
FLJ16779	CALCRL	0.468472	1.82432e-33
FLJ16779	CALN1	0.522776	1.27575e-42
FLJ16779	CALU	-0.237801	5.12614e-09
FLJ16779	CAMK2A	0.238406	4.67528e-09
FLJ16779	CAMSAP3	0.523355	9.97824e-43
FLJ16779	CAPG	-0.388296	1.23769e-22
FLJ16779	CARD16	-0.590427	1.28326e-56
FLJ16779	CASKIN1	0.555096	6.58088e-49
FLJ16779	CAV1	-0.413728	9.26136e-26
FLJ16779	CAVIN1	-0.420985	1.0575e-26
FLJ16779	CBLN1	0.526212	2.94559e-43
FLJ16779	CBR1	-0.204212	5.78292e-07
FLJ16779	CCDC8	-0.525984	3.24912e-43
FLJ16779	CCL2	-0.351721	1.36028e-18
FLJ16779	CCN1	-0.241789	2.78154e-09
FLJ16779	CCNA2	-0.407544	5.6459e-25
FLJ16779	CCNB1	-0.448659	1.63339e-30
FLJ16779	CCNB2	-0.352196	1.21473e-18
FLJ16779	CD14	0.0172414	0.676255
FLJ16779	CD151	-0.483506	7.73832e-36
FLJ16779	CD163	-0.501399	8.07752e-39
FLJ16779	CD24	0.351458	1.44845e-18
FLJ16779	CD248	-0.619845	8.3755e-64
FLJ16779	CD38	0.607706	9.52983e-61
FLJ16779	CD44	-0.25861	1.86996e-10
FLJ16779	CD58	-0.635603	5.62085e-68
FLJ16779	CD63	0.145556	0.00039419
FLJ16779	CD74	0.189153	3.78847e-06
FLJ16779	CD93	-0.512731	8.42923e-41
FLJ16779	CDC20	-0.358292	2.78821e-19
FLJ16779	CDCA8	-0.371552	1.0157e-20
FLJ16779	CDH20	0.622737	1.4954e-64
FLJ16779	CDHR1	0.632115	4.94872e-67
FLJ16779	CDK5R1	0.435245	1.27166e-28
FLJ16779	CDKN2C	-0.351288	1.50823e-18
FLJ16779	CEBPD	-0.412516	1.32407e-25
FLJ16779	CELF3	0.509447	3.21834e-40
FLJ16779	CELF5	0.557629	1.97732e-49
FLJ16779	CFI	-0.467345	2.71794e-33
FLJ16779	CHGA	0.396927	1.1533e-23
FLJ16779	CHGB	0.473814	2.70133e-34
FLJ16779	CHI3L1	-0.389223	9.62417e-23
FLJ16779	CHI3L2	-0.459238	4.58222e-32
FLJ16779	CKS2	-0.121059	0.00325462
FLJ16779	CLCF1	-0.589474	2.13326e-56
FLJ16779	CLEC5A	-0.667821	2.60294e-77
FLJ16779	CLIC1	-0.536676	3.05469e-45
FLJ16779	CMTM5	0.616904	4.73897e-63
FLJ16779	CNTN1	0.424391	3.74953e-27
FLJ16779	CNTN3	0.53325	1.38775e-44
FLJ16779	CNTNAP2	0.470605	8.54592e-34
FLJ16779	COL1A1	-0.613652	3.15253e-62
FLJ16779	COL1A2	-0.617475	3.38865e-63
FLJ16779	COL3A1	-0.629579	2.36353e-66
FLJ16779	COL4A1	-0.57266	1.26565e-52
FLJ16779	COL4A2	-0.55063	5.35037e-48
FLJ16779	COL5A1	-0.625103	3.60514e-65
FLJ16779	COL5A2	-0.667261	3.86907e-77
FLJ16779	COL6A2	-0.615611	1.00911e-62
FLJ16779	COL8A1	-0.61156	1.05471e-61
FLJ16779	CP	-0.354022	7.84338e-19
FLJ16779	CPLX1	0.464914	6.39257e-33
FLJ16779	CPLX2	0.351531	1.42319e-18
FLJ16779	CPQ	-0.533822	1.07923e-44
FLJ16779	CPVL	-0.450125	1.00292e-30
FLJ16779	CRLF1	0.306199	2.99066e-14
FLJ16779	CRTAC1	0.623719	8.30058e-65
FLJ16779	CRY2	0.556753	3.00096e-49
FLJ16779	CSDC2	0.757415	9.2441e-111
FLJ16779	CSMD3	0.536283	3.63819e-45
FLJ16779	CTHRC1	-0.583652	4.57604e-55
FLJ16779	CTTNBP2	0.602869	1.44712e-59
FLJ16779	CUX2	0.436946	7.39772e-29
FLJ16779	CXCL10	-0.580514	2.32903e-54
FLJ16779	CXCL14	-0.288199	9.93489e-13
FLJ16779	CXCL8	-0.527551	1.65647e-43
FLJ16779	CXCR4	-0.392922	3.49882e-23
FLJ16779	CYTL1	-0.416531	4.03109e-26
FLJ16779	DAAM2	0.501594	7.47666e-39
FLJ16779	DCTD	-0.429394	8.00107e-28
FLJ16779	DCX	0.462104	1.70226e-32
FLJ16779	DDIT4L	-0.548445	1.47442e-47
FLJ16779	DDN	0.29343	3.6815e-13
FLJ16779	DEPP1	-0.405054	1.15705e-24
FLJ16779	DIRAS3	-0.595404	8.80147e-58
FLJ16779	DISP3	0.591651	6.67135e-57
FLJ16779	DLGAP1	0.540106	6.59557e-46
FLJ16779	DLL1	0.527203	1.92444e-43
FLJ16779	DLL3	0.462282	1.60073e-32
FLJ16779	DMRTA2	-0.566518	2.67432e-51
FLJ16779	DNM3	0.661575	2.06836e-75
FLJ16779	DPY19L1	-0.387814	1.4102e-22
FLJ16779	DPYD	-0.675566	9.85776e-80
FLJ16779	DSCAM	0.601103	3.8634e-59
FLJ16779	DSCAML1	0.686638	2.51487e-83
FLJ16779	DUSP26	0.616175	7.25964e-63
FLJ16779	DUSP5	-0.488554	1.16225e-36
FLJ16779	DUSP6	-0.55842	1.35501e-49
FLJ16779	EEPD1	0.658124	2.21852e-74
FLJ16779	EFEMP1	-0.19284	2.42345e-06
FLJ16779	EFEMP2	-0.626476	1.57034e-65
FLJ16779	EHD2	-0.44068	2.22945e-29
FLJ16779	ELFN2	0.696176	1.48986e-86
FLJ16779	EMILIN1	-0.477076	8.27544e-35
FLJ16779	EMILIN2	-0.544967	7.29135e-47
FLJ16779	EMILIN3	-0.388847	1.06577e-22
FLJ16779	EMP1	-0.413901	8.80022e-26
FLJ16779	EMP3	-0.669358	8.72292e-78
FLJ16779	EN1	-0.3929	3.52066e-23
FLJ16779	ENHO	0.363182	8.36814e-20
FLJ16779	EPHB1	0.679963	3.85278e-81
FLJ16779	ESM1	-0.578397	6.91116e-54
FLJ16779	ETNPPL	0.51115	1.60928e-40
FLJ16779	EVA1B	-0.60209	2.23313e-59
FLJ16779	EVA1C	-0.539457	8.82819e-46
FLJ16779	EYA1	0.564268	8.04569e-51
FLJ16779	F13A1	-0.506306	1.14372e-39
FLJ16779	F3	-0.251917	5.60531e-10
FLJ16779	FA2H	0.519331	5.45641e-42
FLJ16779	FABP5	-0.633469	2.13405e-67
FLJ16779	FABP7	-0.130742	0.00147311
FLJ16779	FAIM2	0.313945	6.13482e-15
FLJ16779	FAM110B	0.548784	1.2606e-47
FLJ16779	FAM114A1	-0.622376	1.85699e-64
FLJ16779	FAM133A	0.592575	4.06054e-57
FLJ16779	FAM155A	0.515124	3.1453e-41
FLJ16779	FAM163B	0.377839	2.00023e-21
FLJ16779	FAM171A1	0.484392	5.56189e-36
FLJ16779	FAM181A	-0.36205	1.10773e-19
FLJ16779	FAM20C	-0.484283	5.79281e-36
FLJ16779	FAM222A	0.624148	6.41435e-65
FLJ16779	FBLIM1	-0.559114	9.72087e-50
FLJ16779	FBLL1	0.485314	3.93844e-36
FLJ16779	FBLN1	-0.49473	1.09429e-37
FLJ16779	FBLN5	-0.421555	8.89696e-27
FLJ16779	FBXL16	0.387663	1.46884e-22
FLJ16779	FBXO17	-0.609716	3.03539e-61
FLJ16779	FCER1G	-0.216247	1.15888e-07
FLJ16779	FCGBP	-0.41515	6.08002e-26
FLJ16779	FCGR2A	-0.458182	6.58175e-32
FLJ16779	FCGR3A	-0.318811	2.21438e-15
FLJ16779	FCHSD2	0.477998	5.91067e-35
FLJ16779	FERMT1	0.591408	7.59617e-57
FLJ16779	FGF12	0.476524	1.01214e-34
FLJ16779	FGFRL1	-0.569422	6.37122e-52
FLJ16779	FKBP10	-0.322521	1.0054e-15
FLJ16779	FKBP9	-0.59301	3.21301e-57
FLJ16779	FLNA	-0.0901489	0.0286944
FLJ16779	FLNC	-0.33306	1.00461e-16
FLJ16779	FLRT1	0.635077	7.81959e-68
FLJ16779	FMOD	-0.609444	3.54629e-61
FLJ16779	FN1	-0.443866	7.91557e-30
FLJ16779	FOSL1	-0.575153	3.60346e-53
FLJ16779	FOXJ1	-0.317901	2.68296e-15
FLJ16779	FSTL1	-0.591411	7.58612e-57
FLJ16779	FSTL5	0.478726	4.52666e-35
FLJ16779	FTL	0.229724	1.71053e-08
FLJ16779	FUCA2	-0.441032	1.98942e-29
FLJ16779	FUT9	0.653669	4.53468e-73
FLJ16779	FXYD6	0.34622	4.98353e-18
FLJ16779	G0S2	-0.634524	1.1048e-67
FLJ16779	GABBR1	0.40846	4.33081e-25
FLJ16779	GABBR2	0.475026	1.74303e-34
FLJ16779	GABRA3	0.541543	3.4531e-46
FLJ16779	GABRB3	0.522254	1.59209e-42
FLJ16779	GABRD	0.408483	4.30193e-25
FLJ16779	GABRG1	0.494737	1.09117e-37
FLJ16779	GABRG2	0.352998	1.00273e-18
FLJ16779	GADD45A	-0.491282	4.11733e-37
FLJ16779	GALNT13	0.659608	8.03302e-75
FLJ16779	GALNT9	0.400877	3.80228e-24
FLJ16779	GAP43	0.166195	5.05444e-05
FLJ16779	GBP1	-0.489364	8.54953e-37
FLJ16779	GBP2	-0.266524	4.90129e-11
FLJ16779	GDAP1L1	0.540272	6.12341e-46
FLJ16779	GDF15	-0.671307	2.16094e-78
FLJ16779	GFRA1	0.5044	2.45313e-39
FLJ16779	GGTA1	0.624037	6.8565e-65
FLJ16779	GLUD1	0.307358	2.36651e-14
FLJ16779	GNAL	0.561863	2.58758e-50
FLJ16779	GNAO1	0.483709	7.17602e-36
FLJ16779	GNG12	-0.443771	8.16724e-30
FLJ16779	GNG5	-0.16793	4.20334e-05
FLJ16779	GPNMB	-0.432371	3.15289e-28
FLJ16779	GPR158	0.462307	1.58655e-32
FLJ16779	GPR17	0.557283	2.33166e-49
FLJ16779	GPR27	0.528059	1.3304e-43
FLJ16779	GPX7	-0.48555	3.60567e-36
FLJ16779	GPX8	-0.736321	1.16641e-101
FLJ16779	GRIA2	0.5721	1.67616e-52
FLJ16779	GRIA4	0.576955	1.44317e-53
FLJ16779	GRIK2	0.573538	8.144e-53
FLJ16779	GRIN1	0.393434	3.03854e-23
FLJ16779	H2BC12	-0.297598	1.64472e-13
FLJ16779	HES5	0.474483	2.12205e-34
FLJ16779	HES6	0.253059	4.65807e-10
FLJ16779	HILPDA	-0.505358	1.67256e-39
FLJ16779	HIP1R	0.555378	5.76041e-49
FLJ16779	HIPK2	0.525678	3.70462e-43
FLJ16779	HLA-A	0.168462	3.97073e-05
FLJ16779	HLA-B	0.157271	0.000126786
FLJ16779	HLA-DMA	-0.28395	2.19235e-12
FLJ16779	HLA-DMB	-0.361163	1.37909e-19
FLJ16779	HLA-DOA	-0.323697	7.80961e-16
FLJ16779	HLA-DPA1	-0.300882	8.63584e-14
FLJ16779	HLA-DPB1	-0.15874	0.000109331
FLJ16779	HLA-DQA1	-0.432599	2.9348e-28
FLJ16779	HLA-DQA2	-0.297133	1.80064e-13
FLJ16779	HLA-DQB1	-0.369993	1.51158e-20
FLJ16779	HLA-DRA	0.160127	9.49566e-05
FLJ16779	HLA-DRB1	0.0595391	0.148969
FLJ16779	HLA-DRB5	-0.0442465	0.283686
FLJ16779	HMOX1	-0.135397	0.000987073
FLJ16779	HMX1	0.597074	3.54511e-58
FLJ16779	HOPX	-0.354881	6.37741e-19
FLJ16779	HOXA5	-0.448157	1.92891e-30
FLJ16779	HOXB2	-0.418062	2.55054e-26
FLJ16779	HOXB7	-0.44264	1.18059e-29
FLJ16779	HOXC10	-0.426826	1.77391e-27
FLJ16779	HPCAL4	0.373586	6.02682e-21
FLJ16779	HPSE2	0.591699	6.49953e-57
FLJ16779	HRH3	0.394464	2.28617e-23
FLJ16779	HSPA6	-0.445292	4.96336e-30
FLJ16779	HSPB1	-0.0832621	0.0433906
FLJ16779	HSPB6	-0.372765	7.44398e-21
FLJ16779	IBSP	-0.571223	2.59999e-52
FLJ16779	ICAM1	-0.453375	3.37148e-31
FLJ16779	IFI6	0.0532814	0.196609
FLJ16779	IFITM10	0.597698	2.51958e-58
FLJ16779	IFITM3	0.053215	0.197168
FLJ16779	IGF2BP2	-0.487074	2.03279e-36
FLJ16779	IGFBP2	-0.664554	2.60064e-76
FLJ16779	IGFBP3	-0.513989	5.02414e-41
FLJ16779	IGFBP4	-0.34045	1.89305e-17
FLJ16779	IGFBP5	-0.124325	0.00250613
FLJ16779	IGFBP7	0.119502	0.00367857
FLJ16779	IL13RA2	-0.516255	1.96841e-41
FLJ16779	IL1RAP	-0.566382	2.85859e-51
FLJ16779	INA	0.43379	2.01561e-28
FLJ16779	IQGAP1	-0.507479	7.13515e-40
FLJ16779	IQGAP2	-0.393957	2.63049e-23
FLJ16779	ISG15	-0.208107	3.47319e-07
FLJ16779	ITGA3	-0.520749	3.00615e-42
FLJ16779	ITGA5	-0.63217	4.7822e-67
FLJ16779	ITGA7	-0.376222	3.04813e-21
FLJ16779	JPH3	0.624759	4.43868e-65
FLJ16779	JPH4	0.554752	7.74332e-49
FLJ16779	KCNB1	0.643747	3.13584e-70
FLJ16779	KCND2	0.542244	2.51496e-46
FLJ16779	KCNE4	-0.513252	6.80528e-41
FLJ16779	KCNIP2	0.545494	5.72837e-47
FLJ16779	KCNIP3	0.677096	3.21202e-80
FLJ16779	KCNJ11	0.508318	5.08498e-40
FLJ16779	KCNJ9	0.549014	1.13332e-47
FLJ16779	KCNK3	0.386427	2.04984e-22
FLJ16779	KCNN3	0.678784	9.24453e-81
FLJ16779	KCNQ2	0.477824	6.29817e-35
FLJ16779	KDELR3	-0.729752	5.30099e-99
FLJ16779	KIAA0040	-0.5144	4.24153e-41
FLJ16779	KIF1A	0.365494	4.70224e-20
FLJ16779	KIF21B	0.656138	8.569e-74
FLJ16779	KIF2C	-0.331192	1.5211e-16
FLJ16779	KIF4A	-0.401925	2.82511e-24
FLJ16779	KIF5A	0.265959	5.40127e-11
FLJ16779	KLHDC8A	-0.399159	6.17196e-24
FLJ16779	KLHL32	0.61142	1.14308e-61
FLJ16779	KLRC2	0.287534	1.12556e-12
FLJ16779	L1CAM	0.364811	5.5776e-20
FLJ16779	LAMB1	-0.600261	6.15358e-59
FLJ16779	LAMC1	-0.5933	2.74879e-57
FLJ16779	LCNL1	0.496473	5.56906e-38
FLJ16779	LDHA	-0.355665	5.27819e-19
FLJ16779	LGALS1	-0.0245561	0.551989
FLJ16779	LGALS3	-0.577434	1.13008e-53
FLJ16779	LGR6	-0.373	7.00778e-21
FLJ16779	LHFPL3	0.32163	1.21657e-15
FLJ16779	LHFPL4	0.589279	2.36633e-56
FLJ16779	LIF	-0.618909	1.45623e-63
FLJ16779	LIMS2	0.504548	2.31218e-39
FLJ16779	LINC00634	0.67356	4.24734e-79
FLJ16779	LINC00672	0.570394	3.93098e-52
FLJ16779	LINGO1	0.416811	3.70755e-26
FLJ16779	LOX	-0.674194	2.68003e-79
FLJ16779	LOXL1	-0.624132	6.47483e-65
FLJ16779	LOXL2	-0.503956	2.92825e-39
FLJ16779	LRATD2	0.500625	1.09635e-38
FLJ16779	LRIG1	0.376026	3.20688e-21
FLJ16779	LRRN4CL	-0.43882	4.05929e-29
FLJ16779	LSP1	-0.604239	6.72876e-60
FLJ16779	LTF	-0.522953	1.18382e-42
FLJ16779	LUM	-0.640549	2.45088e-69
FLJ16779	LUZP2	0.640423	2.6567e-69
FLJ16779	LY96	-0.455048	1.91526e-31
FLJ16779	LYZ	-0.533931	1.02847e-44
FLJ16779	MACROH2A2	0.431054	4.76623e-28
FLJ16779	MAOB	0.0301376	0.465371
FLJ16779	MAP1LC3C	-0.628257	5.31102e-66
FLJ16779	MAP2	0.330658	1.71172e-16
FLJ16779	MAP3K7CL	-0.570021	4.73144e-52
FLJ16779	MAPK8IP2	0.467948	2.19639e-33
FLJ16779	MAPT	0.487206	1.93418e-36
FLJ16779	MARCHF8	0.564935	5.80973e-51
FLJ16779	MARVELD1	-0.543899	1.18647e-46
FLJ16779	MAST1	0.523416	9.72155e-43
FLJ16779	MBP	0.358273	2.80163e-19
FLJ16779	MCAM	-0.301089	8.29095e-14
FLJ16779	MCUB	-0.696977	7.8807e-87
FLJ16779	MDK	-0.431305	4.40484e-28
FLJ16779	MEGF11	0.53292	1.60402e-44
FLJ16779	MEOX2	-0.620173	6.89181e-64
FLJ16779	MEST	-0.346712	4.44231e-18
FLJ16779	METTL7B	-0.599012	1.22504e-58
FLJ16779	MFAP4	-0.210827	2.41831e-07
FLJ16779	MGP	-0.482206	1.25476e-35
FLJ16779	MMD2	0.566647	2.50969e-51
FLJ16779	MMP14	-0.446542	3.28942e-30
FLJ16779	MMP9	-0.580278	2.62908e-54
FLJ16779	MN1	0.574454	5.13022e-53
FLJ16779	MOBP	0.4268	1.78788e-27
FLJ16779	MOXD1	-0.627941	6.43878e-66
FLJ16779	MRC2	-0.483557	7.59427e-36
FLJ16779	MS4A6A	-0.401453	3.23001e-24
FLJ16779	MSN	-0.373426	6.28176e-21
FLJ16779	MSR1	-0.553567	1.3532e-48
FLJ16779	MT1E	-0.163935	6.4095e-05
FLJ16779	MT1M	-0.397808	9.01546e-24
FLJ16779	MTURN	0.34991	2.09176e-18
FLJ16779	MYBL2	-0.266843	4.63992e-11
FLJ16779	MYD88	-0.474844	1.86212e-34
FLJ16779	MYH7	0.418399	2.30556e-26
FLJ16779	MYL12A	-0.593103	3.05664e-57
FLJ16779	MYT1	0.585118	2.12691e-55
FLJ16779	NALCN	0.649206	8.85435e-72
FLJ16779	NAMPT	-0.632794	3.2467e-67
FLJ16779	NAP1L2	0.420048	1.40369e-26
FLJ16779	NAP1L3	0.401047	3.6237e-24
FLJ16779	NDN	0.434298	1.71641e-28
FLJ16779	NDRG2	0.321439	1.26724e-15
FLJ16779	NECAB2	0.460995	2.50022e-32
FLJ16779	NET1	0.60542	3.46706e-60
FLJ16779	NEU4	0.596669	4.42152e-58
FLJ16779	NGFR	-0.308373	1.92619e-14
FLJ16779	NIBAN1	-0.56062	4.71437e-50
FLJ16779	NKAIN1	0.538	1.69453e-45
FLJ16779	NKAIN4	0.458471	5.96181e-32
FLJ16779	NKD1	0.589987	1.62323e-56
FLJ16779	NMNAT2	0.486852	2.21027e-36
FLJ16779	NNMT	-0.676003	7.16061e-80
FLJ16779	NOG	0.61161	1.02507e-61
FLJ16779	NPNT	-0.444306	6.85484e-30
FLJ16779	NPPA	0.449379	1.28557e-30
FLJ16779	NRG3	0.546935	2.95826e-47
FLJ16779	NRSN1	0.455321	1.74595e-31
FLJ16779	NRXN1	0.56246	1.93801e-50
FLJ16779	NSG2	0.456392	1.21329e-31
FLJ16779	NTN4	0.535997	4.1292e-45
FLJ16779	NTNG2	0.637321	1.9062e-68
FLJ16779	NTRK2	0.388909	1.04793e-22
FLJ16779	NTSR2	0.500836	1.00861e-38
FLJ16779	NUSAP1	-0.0931554	0.0237634
FLJ16779	NXPH1	0.57589	2.47955e-53
FLJ16779	OAS1	-0.420917	1.07963e-26
FLJ16779	OCIAD2	-0.654378	2.81407e-73
FLJ16779	OLFML3	-0.350574	1.78722e-18
FLJ16779	OLIG1	0.199294	1.08564e-06
FLJ16779	OLIG2	0.230173	1.6015e-08
FLJ16779	OMG	0.569196	7.12751e-52
FLJ16779	OPHN1	0.617261	3.8426e-63
FLJ16779	OSMR	-0.62025	6.58639e-64
FLJ16779	OTOS	-0.327252	3.61484e-16
FLJ16779	PACSIN1	0.289933	7.16557e-13
FLJ16779	PBK	-0.234681	8.20698e-09
FLJ16779	PCDH15	0.632399	4.14784e-67
FLJ16779	PCOLCE	-0.637373	1.84467e-68
FLJ16779	PDE2A	0.534797	7.02066e-45
FLJ16779	PDGFA	-0.48306	9.13848e-36
FLJ16779	PDIA4	-0.2528	4.8585e-10
FLJ16779	PDLIM1	-0.617329	3.69225e-63
FLJ16779	PDLIM3	-0.387253	1.64086e-22
FLJ16779	PDLIM4	-0.635764	5.07975e-68
FLJ16779	PDPN	-0.637845	1.36828e-68
FLJ16779	PDZD4	0.404873	1.21853e-24
FLJ16779	PGAP4	0.548183	1.66417e-47
FLJ16779	PHACTR3	0.678659	1.01372e-80
FLJ16779	PHYHIPL	0.470224	9.78798e-34
FLJ16779	PI3	-0.538702	1.238e-45
FLJ16779	PID1	0.531518	2.96332e-44
FLJ16779	PIMREG	-0.255161	3.30551e-10
FLJ16779	PINLYP	-0.636297	3.63517e-68
FLJ16779	PIPOX	-0.428554	1.03908e-27
FLJ16779	PKIB	-0.56438	7.61789e-51
FLJ16779	PLA2G2A	-0.543811	1.23489e-46
FLJ16779	PLA2G5	-0.640709	2.21322e-69
FLJ16779	PLAT	-0.574355	5.3924e-53
FLJ16779	PLAU	-0.570357	4.00242e-52
FLJ16779	PLAUR	-0.642186	8.58092e-70
FLJ16779	PLEKHA4	-0.468349	1.90574e-33
FLJ16779	PLIN2	-0.571481	2.28531e-52
FLJ16779	PLP1	0.282596	2.81328e-12
FLJ16779	PLP2	-0.589242	2.41264e-56
FLJ16779	PLPPR1	0.540429	5.70549e-46
FLJ16779	PLPPR3	0.449395	1.27885e-30
FLJ16779	PLSCR1	-0.575343	3.27188e-53
FLJ16779	POSTN	-0.623342	1.041e-64
FLJ16779	PPIC	-0.629704	2.18939e-66
FLJ16779	PPM1L	0.693356	1.3817e-85
FLJ16779	PPP2R2C	0.384924	3.06903e-22
FLJ16779	PRLHR	0.486378	2.64247e-36
FLJ16779	PRR36	0.580655	2.16478e-54
FLJ16779	PRSS35	0.567046	2.06307e-51
FLJ16779	PSD	0.473808	2.70737e-34
FLJ16779	PSRC1	-0.438995	3.83714e-29
FLJ16779	PTGFRN	-0.496093	6.45498e-38
FLJ16779	PTPRT	0.558349	1.40236e-49
FLJ16779	PTTG1	-0.381675	7.29074e-22
FLJ16779	PTX3	-0.639417	5.04609e-69
FLJ16779	PYGL	-0.562661	1.75798e-50
FLJ16779	RAB32	-0.564806	6.18741e-51
FLJ16779	RAB34	-0.669429	8.29466e-78
FLJ16779	RAB36	-0.543097	1.70833e-46
FLJ16779	RAB42	-0.626213	1.84238e-65
FLJ16779	RAP2A	0.418401	2.3039e-26
FLJ16779	RAPGEF4	0.515697	2.4814e-41
FLJ16779	RARRES2	-0.610933	1.51203e-61
FLJ16779	RASGEF1C	0.58645	1.05643e-55
FLJ16779	RASGRF1	0.453124	3.66918e-31
FLJ16779	RASL10A	0.721657	7.82076e-96
FLJ16779	RBP1	-0.605942	2.58421e-60
FLJ16779	RCOR2	0.414701	6.94414e-26
FLJ16779	RDH10	-0.545203	6.54424e-47
FLJ16779	REPS2	0.574827	4.2487e-53
FLJ16779	RGR	0.459653	3.9721e-32
FLJ16779	RGS11	0.520632	3.15812e-42
FLJ16779	RGS16	-0.496547	5.41061e-38
FLJ16779	RHBDL3	0.631271	8.34164e-67
FLJ16779	RHOJ	-0.533819	1.08041e-44
FLJ16779	RIPPLY2	0.610336	2.12935e-61
FLJ16779	RNASE2	-0.498884	2.17286e-38
FLJ16779	RPL39L	-0.499164	1.94688e-38
FLJ16779	RPRM	0.477009	8.47981e-35
FLJ16779	RRM2	-0.33266	1.09841e-16
FLJ16779	RTN1	0.339156	2.54411e-17
FLJ16779	RTP5	0.541303	3.84781e-46
FLJ16779	RUNDC3A	0.480337	2.50403e-35
FLJ16779	S100A10	-0.21352	1.68218e-07
FLJ16779	S100A11	-0.310387	1.27754e-14
FLJ16779	S100A13	-0.407132	6.36054e-25
FLJ16779	S100A3	-0.292793	4.15953e-13
FLJ16779	S100A4	-0.63387	1.66225e-67
FLJ16779	S100A6	0.123448	0.00268994
FLJ16779	S100A8	-0.490972	4.63441e-37
FLJ16779	S100A9	-0.484746	4.8726e-36
FLJ16779	SAA1	-0.54736	2.43184e-47
FLJ16779	SCD	0.287354	1.16406e-12
FLJ16779	SCG3	0.305243	3.62455e-14
FLJ16779	SCN3A	0.488647	1.12235e-36
FLJ16779	SCN3B	0.438531	4.45382e-29
FLJ16779	SCRT1	0.498375	2.65211e-38
FLJ16779	SDC1	-0.617444	3.45092e-63
FLJ16779	SDC4	-0.176874	1.57742e-05
FLJ16779	SEC61G	-0.431554	4.07414e-28
FLJ16779	SEL1L3	-0.590497	1.23649e-56
FLJ16779	SELL	0.405801	9.33618e-25
FLJ16779	SEMA6B	0.525862	3.42292e-43
FLJ16779	SEPTIN3	0.369097	1.89757e-20
FLJ16779	SERPINA1	-0.505544	1.55273e-39
FLJ16779	SERPINA5	-0.442729	1.14707e-29
FLJ16779	SERPINE1	-0.609458	3.51789e-61
FLJ16779	SERPING1	-0.360892	1.47431e-19
FLJ16779	SERPINH1	-0.608817	5.06921e-61
FLJ16779	SEZ6L	0.436447	8.67578e-29
FLJ16779	SFRP2	0.515279	2.94951e-41
FLJ16779	SFRP4	-0.467374	2.69039e-33
FLJ16779	SH3GL2	0.447042	2.78968e-30
FLJ16779	SHD	0.5155	2.69163e-41
FLJ16779	SHISA7	0.63401	1.52347e-67
FLJ16779	SHISAL1	0.419457	1.67757e-26
FLJ16779	SHOX2	-0.519341	5.43158e-42
FLJ16779	SLC11A1	-0.41412	8.24782e-26
FLJ16779	SLC17A7	0.272396	1.76338e-11
FLJ16779	SLC1A1	0.485123	4.23179e-36
FLJ16779	SLC1A4	0.522792	1.2671e-42
FLJ16779	SLC22A6	0.521251	2.4321e-42
FLJ16779	SLC25A27	0.557295	2.31788e-49
FLJ16779	SLC25A48	0.581745	1.23271e-54
FLJ16779	SLC2A10	-0.590461	1.26059e-56
FLJ16779	SLC43A3	-0.632946	2.95459e-67
FLJ16779	SLC6A1	0.371444	1.04422e-20
FLJ16779	SLC7A14	0.428299	1.12468e-27
FLJ16779	SLC8A2	0.438947	3.89716e-29
FLJ16779	SLCO1A2	0.59851	1.6146e-58
FLJ16779	SLIT1	0.557163	2.46891e-49
FLJ16779	SLITRK1	0.536789	2.90484e-45
FLJ16779	SLN	-0.275115	1.08903e-11
FLJ16779	SMIM18	0.520684	3.08949e-42
FLJ16779	SMIM3	-0.668361	1.77447e-77
FLJ16779	SMOC1	0.349822	2.13565e-18
FLJ16779	SMPD3	0.547954	1.84986e-47
FLJ16779	SNAP25	0.234834	8.02128e-09
FLJ16779	SNAP91	0.544702	8.22915e-47
FLJ16779	SNCB	0.298101	1.49079e-13
FLJ16779	SNCG	0.33603	5.16497e-17
FLJ16779	SNX22	0.532467	1.95628e-44
FLJ16779	SOCS2	-0.493829	1.54928e-37
FLJ16779	SOCS3	-0.559378	8.56554e-50
FLJ16779	SOD2	-0.341184	1.6001e-17
FLJ16779	SOD3	-0.45894	5.07506e-32
FLJ16779	SOX8	0.307787	2.16979e-14
FLJ16779	SPHKAP	0.550274	6.31351e-48
FLJ16779	SPINK8	-0.515798	2.37952e-41
FLJ16779	SPOCD1	-0.495374	8.52887e-38
FLJ16779	SPON1	0.352428	1.14905e-18
FLJ16779	SPP1	0.130057	0.00156083
FLJ16779	SPRY1	-0.641415	1.40814e-69
FLJ16779	SPRY2	-0.337644	3.58677e-17
FLJ16779	SPRY4	-0.546543	3.54161e-47
FLJ16779	SPTBN2	0.559159	9.51475e-50
FLJ16779	SRPX2	-0.651682	1.71298e-72
FLJ16779	SSTR1	0.506007	1.28961e-39
FLJ16779	SSTR2	0.552073	2.72832e-48
FLJ16779	ST8SIA3	0.43934	3.43478e-29
FLJ16779	STAC	-0.589864	1.73337e-56
FLJ16779	STEAP3	-0.624141	6.44005e-65
FLJ16779	STOX1	0.510989	1.71872e-40
FLJ16779	STUM	0.546509	3.59717e-47
FLJ16779	STX1B	0.468518	1.7952e-33
FLJ16779	SULF2	0.443532	8.82857e-30
FLJ16779	SUSD5	0.375432	3.7415e-21
FLJ16779	SVOP	0.37935	1.3462e-21
FLJ16779	SYN1	0.323306	8.49579e-16
FLJ16779	SYP	0.316504	3.59825e-15
FLJ16779	SYT4	0.313146	7.24035e-15
FLJ16779	TAGLN	-0.295361	2.5387e-13
FLJ16779	TAGLN2	-0.563691	1.0657e-50
FLJ16779	TCEA3	-0.55819	1.51249e-49
FLJ16779	TCEAL2	0.424836	3.27212e-27
FLJ16779	TCIM	-0.388877	1.05712e-22
FLJ16779	TEAD2	-0.53908	1.0454e-45
FLJ16779	TEAD3	-0.607581	1.02296e-60
FLJ16779	TEF	0.477294	7.64307e-35
FLJ16779	TENT5A	-0.544434	9.29873e-47
FLJ16779	TF	0.412404	1.36807e-25
FLJ16779	TGFB2	-0.438625	4.32255e-29
FLJ16779	TGFBI	-0.477636	6.7467e-35
FLJ16779	TGIF1	-0.554094	1.05631e-48
FLJ16779	THBS1	-0.562604	1.80744e-50
FLJ16779	TIMP1	-0.694314	6.50198e-86
FLJ16779	TJP2	0.565708	3.97996e-51
FLJ16779	TK1	-0.345423	6.00295e-18
FLJ16779	TLCD3B	0.623418	9.94236e-65
FLJ16779	TM4SF1	-0.42096	1.0655e-26
FLJ16779	TMBIM1	-0.379416	1.32296e-21
FLJ16779	TMEFF2	0.575486	3.04354e-53
FLJ16779	TMEM100	0.583734	4.38413e-55
FLJ16779	TMEM106C	-0.464226	8.13205e-33
FLJ16779	TMEM151B	0.478926	4.20767e-35
FLJ16779	TMEM158	-0.516263	1.96181e-41
FLJ16779	TMEM176A	-0.336974	4.17459e-17
FLJ16779	TMEM176B	-0.282335	2.95142e-12
FLJ16779	TMEM179	0.467979	2.1726e-33
FLJ16779	TMSB10	0.235478	7.28223e-09
FLJ16779	TMSB4X	0.212476	1.93732e-07
FLJ16779	TNC	-0.30187	7.10352e-14
FLJ16779	TNFAIP6	-0.649759	6.14279e-72
FLJ16779	TNFRSF11B	-0.680196	3.23911e-81
FLJ16779	TNFRSF12A	-0.615436	1.11785e-62
FLJ16779	TNFRSF19	-0.348353	3.02166e-18
FLJ16779	TNFRSF1A	-0.422572	6.53396e-27
FLJ16779	TNK2	0.628118	5.78014e-66
FLJ16779	TNR	0.561089	3.76183e-50
FLJ16779	TOP2A	-0.0442643	0.283492
FLJ16779	TOX	0.446814	3.00796e-30
FLJ16779	TPM4	-0.267087	4.44861e-11
FLJ16779	TPPP	0.368132	2.42271e-20
FLJ16779	TPX2	-0.119296	0.00373838
FLJ16779	TRIM67	0.311233	1.0739e-14
FLJ16779	TRIP6	-0.397909	8.76323e-24
FLJ16779	TSPOAP1	0.570132	4.47764e-52
FLJ16779	TSTD1	-0.567017	2.09182e-51
FLJ16779	TUB	0.644075	2.53543e-70
FLJ16779	TUBA1C	-0.692508	2.68638e-85
FLJ16779	TUBB4A	0.32606	4.68538e-16
FLJ16779	TUBB6	-0.491233	4.19542e-37
FLJ16779	TYMP	-0.469001	1.51217e-33
FLJ16779	TYMS	-0.353078	9.83723e-19
FLJ16779	TYROBP	0.0366918	0.374061
FLJ16779	UBE2C	-0.155519	0.000151006
FLJ16779	UBE2S	-0.37638	2.9253e-21
FLJ16779	UGT8	0.61625	6.94967e-63
FLJ16779	UNC13A	0.460986	2.50787e-32
FLJ16779	UNC5A	0.508081	5.59608e-40
FLJ16779	UNC79	0.481615	1.56194e-35
FLJ16779	UPP1	-0.596157	5.84533e-58
FLJ16779	USH1C	0.617919	2.61139e-63
FLJ16779	VAMP5	-0.297504	1.67511e-13
FLJ16779	VASN	-0.610257	2.2276e-61
FLJ16779	VAT1L	0.399732	5.25196e-24
FLJ16779	VAV3	-0.627045	1.1118e-65
FLJ16779	VEGFA	-0.553799	1.2132e-48
FLJ16779	VEPH1	0.51022	2.35111e-40
FLJ16779	VIM	0.0187192	0.650277
FLJ16779	VIPR2	0.557078	2.57002e-49
FLJ16779	VSTM2A	0.364886	5.47522e-20
FLJ16779	VSTM2B	0.598808	1.37034e-58
FLJ16779	WEE1	-0.5799	3.1948e-54
FLJ16779	WNT7B	0.435939	1.01993e-28
FLJ16779	XKR8	-0.600329	5.92813e-59
FLJ16779	ZDHHC22	0.547116	2.72114e-47
FLJ16779	ZNF488	0.574438	5.17123e-53
FLJ16779	ZYX	-0.175241	1.8935e-05
