# Supplementary material for: Development and validation of a two glycolysis-related LncRNAs prognostic signature for glioma and in vitro analyses
Source: Cell Div. 2023 Jun 24;18:10. doi: 10.1186/s13008-023-00092-9 (PMC10290322; doi:10.1186/s13008-023-00092-9)
Supplement: Supplementary file 6 — Additional file 6. Pathway enrichment scores between the two clusters. [file 13008_2023_92_MOESM6_ESM.xlsx]

## Sheet: t.test.Out
	Gene	Pvalue
224	p53_signaling_pathway	4.99e-60
264	Pyrimidine_metabolism	2.45e-54
6	Adrenergic_signaling_in_cardiomyocytes	2.01e-52
290	Small_cell_lung_cancer	4.04e-51
215	Olfactory_transduction	6.12e-51
175	Long-term_depression	1.63e-50
88	Dopaminergic_synapse	1.77e-50
48	Bladder_cancer	3.22e-50
294	Spinocerebellar_ataxia	1.28e-49
138	GnRH_secretion	1.36e-49
165	Insulin_secretion	1.99e-49
123	Glutamatergic_synapse	2.99e-49
156	Human_T-cell_leukemia_virus_1_infection	3.28e-49
176	Long-term_potentiation	9.12e-49
60	Cellular_senescence	1.51e-48
54	cAMP_signaling_pathway	6.32e-48
70	Circadian_entrainment	3.63e-47
12	Aldosterone_synthesis_and_secretion	2.94e-46
93	Endocrine_and_other_factor-regulated_calcium_reabsorption	5.89e-46
98	Epstein-Barr_virus_infection	7.96e-46
194	Morphine_addiction	1.08e-45
207	Nicotine_addiction	2.56e-45
321	Transcriptional_misregulation_in_cancer	2.91e-45
90	Drug_metabolism_-_other_enzymes	2.2e-44
223	Oxytocin_signaling_pathway	3.76e-44
287	Serotonergic_synapse	5.16e-44
186	Melanogenesis	6.66e-44
73	Cocaine_addiction	9.38e-44
241	Phosphatidylinositol_signaling_system	1.09e-43
117	Galactose_metabolism	1.77e-43
257	Proteasome	2.4e-43
116	GABAergic_synapse	2.87e-43
306	Taste_transduction	1.51e-42
91	ECM-receptor_interaction	7.2e-42
19	Amphetamine_addiction	1.12e-41
119	Gastric_acid_secretion	1.86e-41
335	Viral_carcinogenesis	4.62e-41
340	Wnt_signaling_pathway	5.44e-41
76	Complement_and_coagulation_cascades	2.06e-40
316	Thyroid_hormone_synthesis	2e-39
124	Glutathione_metabolism	6.31e-39
78	Cortisol_synthesis_and_secretion	7.74e-39
275	Retrograde_endocannabinoid_signaling	1.14e-38
304	Systemic_lupus_erythematosus	2.36e-38
68	Cholinergic_synapse	3.36e-38
16	Amino_sugar_and_nucleotide_sugar_metabolism	4.62e-38
327	Ubiquinone_and_other_terpenoid-quinone_biosynthesis	7.89e-38
284	Salivary_secretion	9.54e-38
99	ErbB_signaling_pathway	5.46e-37
161	Inflammatory_mediator_regulation_of_TRP_channels	5.59e-37
192	Mismatch_repair	8.2e-37
163	Inositol_phosphate_metabolism	1.05e-36
297	Starch_and_sucrose_metabolism	2.27e-36
235	Pentose_phosphate_pathway	2.32e-36
277	Riboflavin_metabolism	3.42e-36
84	D-Glutamine_and_D-glutamate_metabolism	1.97e-35
50	Butanoate_metabolism	2.24e-35
8	AGE-RAGE_signaling_pathway_in_diabetic_complications	3.75e-35
293	Sphingolipid_signaling_pathway	5.18e-35
202	Neuroactive_ligand-receptor_interaction	5.48e-35
226	Pancreatic_secretion	4.71e-34
214	Nucleotide_excision_repair	1.85e-33
25	Apoptosis	2.19e-33
62	cGMP-PKG_signaling_pathway	2.8e-33
11	Aldosterone-regulated_sodium_reabsorption	6.81e-33
247	Platinum_drug_resistance	7.41e-33
227	Pantothenate_and_CoA_biosynthesis	2.27e-32
111	Fluid_shear_stress_and_atherosclerosis	2.71e-32
330	Various_types_of_N-glycan_biosynthesis	2.95e-32
43	Bile_secretion	3.86e-32
95	Endocytosis	4.05e-32
258	Protein_digestion_and_absorption	5.35e-32
87	DNA_replication	6.13e-32
273	Renin_secretion	1.15e-31
18	Amoebiasis	1.45e-31
320	Toxoplasmosis	1.59e-31
225	Pancreatic_cancer	1.61e-31
167	Intestinal_immune_network_for_IgA_production	2.02e-31
181	Malaria	3.78e-31
53	Calcium_signaling_pathway	5.57e-31
269	Regulation_of_lipolysis_in_adipocytes	1.18e-30
59	Cell_cycle	1.33e-30
302	Synaptic_vesicle_cycle	1.68e-30
259	Protein_export	2.09e-30
296	Staphylococcus_aureus_infection	3.19e-30
9	Alanine	3.82e-30
272	Renin-angiotensin_system	1.03e-29
162	Influenza_A	2.08e-29
152	Homologous_recombination	2.81e-29
32	Asthma	2.89e-29
336	Viral_myocarditis	3.05e-29
155	Human_papillomavirus_infection	3.05e-29
134	Glycosphingolipid_biosynthesis_-_globo_and_isoglobo_series	3.07e-29
104	Fatty_acid_biosynthesis	4.04e-29
13	Allograft_rejection	4.4e-29
198	N-Glycan_biosynthesis	7.11e-29
315	Thyroid_hormone_signaling_pathway	7.44e-29
238	Phagosome	9.68e-29
33	Autoimmune_thyroid_disease	1.48e-28
140	Graft-versus-host_disease	1.99e-28
22	Antifolate_resistance	2.34e-28
154	Human_immunodeficiency_virus_1_infection	2.52e-28
169	Kaposi_sarcoma-associated_herpesvirus_infection	5.27e-28
125	Glycerolipid_metabolism	6.17e-28
67	Choline_metabolism_in_cancer	6.76e-28
36	Axon_guidance	1.13e-27
128	Glycolysis_/_Gluconeogenesis	1.45e-27
237	Pertussis	1.69e-27
245	PI3K-Akt_signaling_pathway	1.75e-27
185	Measles	1.82e-27
228	Parathyroid_hormone_synthesis	2.12e-27
196	mTOR_signaling_pathway	2.55e-27
139	GnRH_signaling_pathway	2.96e-27
318	TNF_signaling_pathway	3.54e-27
171	Leishmaniasis	3.73e-27
141	Growth_hormone_synthesis	6.38e-27
142	Hedgehog_signaling_pathway	6.45e-27
159	IL-17_signaling_pathway	1.32e-26
234	Pentose_and_glucuronate_interconversions	3.15e-26
208	Nitrogen_metabolism	3.91e-26
57	Cardiac_muscle_contraction	1.31e-25
180	Lysosome	2.41e-25
332	Vasopressin-regulated_water_reabsorption	2.44e-25
132	Glycosaminoglycan_degradation	5.2e-25
210	Non-alcoholic_fatty_liver_disease	6.23e-25
77	Coronavirus_disease_-_COVID-19	6.89e-25
131	Glycosaminoglycan_biosynthesis_-_keratan_sulfate	8.97e-25
41	Base_excision_repair	9.33e-25
201	Neomycin	1.12e-24
42	beta-Alanine_metabolism	1.48e-24
144	Hepatitis_B	1.51e-24
323	Tuberculosis	2.05e-24
160	Inflammatory_bowel_disease	2.25e-24
112	Focal_adhesion	2.76e-24
276	Rheumatoid_arthritis	4.45e-24
187	Melanoma	1.17e-23
82	Cytosolic_DNA-sensing_pathway	2.42e-23
23	Antigen_processing_and_presentation	2.57e-23
143	Hematopoietic_cell_lineage	2.68e-23
278	Ribosome	3.41e-23
204	Neutrophil_extracellular_trap_formation	3.62e-23
45	Biosynthesis_of_cofactors	4.36e-23
182	Mannose_type_O-glycan_biosynthesis	4.79e-23
219	Other_glycan_degradation	6.05e-23
145	Hepatitis_C	1.41e-22
81	Cytokine-cytokine_receptor_interaction	2.98e-22
221	Ovarian_steroidogenesis	1.37e-21
115	Fructose_and_mannose_metabolism	1.72e-21
170	Legionellosis	1.9e-21
262	Proximal_tubule_bicarbonate_reclamation	1.91e-21
280	RIG-I-like_receptor_signaling_pathway	2.18e-21
20	AMPK_signaling_pathway	2.26e-21
218	Osteoclast_differentiation	6.87e-21
118	Gap_junction	7.69e-21
102	Fanconi_anemia_pathway	1.24e-20
85	Diabetic_cardiomyopathy	2.49e-20
172	Leukocyte_transendothelial_migration	2.8e-20
100	Estrogen_signaling_pathway	3.64e-20
307	Taurine_and_hypotaurine_metabolism	8.9e-20
251	Primary_immunodeficiency	9.05e-20
177	Longevity_regulating_pathway	1.1e-19
136	Glycosylphosphatidylinositol_(GPI)-anchor_biosynthesis	1.51e-19
252	Prion_disease	1.56e-19
337	Viral_protein_interaction_with_cytokine_and_cytokine_receptor	1.67e-19
79	Cushing_syndrome	1.73e-19
325	Type_II_diabetes_mellitus	2e-19
122	Glucagon_signaling_pathway	2.39e-19
261	Proteoglycans_in_cancer	3e-19
324	Type_I_diabetes_mellitus	6.32e-19
311	Th17_cell_differentiation	1.13e-18
55	Carbohydrate_digestion_and_absorption	1.25e-18
289	Signaling_pathways_regulating_pluripotency_of_stem_cells	3.42e-18
168	JAK-STAT_signaling_pathway	3.8e-18
205	NF-kappa_B_signaling_pathway	3.94e-18
133	Glycosphingolipid_biosynthesis_-_ganglio_series	6.64e-18
242	Phospholipase_D_signaling_pathway	7.1e-18
71	Circadian_rhythm	7.66e-18
265	Pyruvate_metabolism	9.54e-18
27	Arachidonic_acid_metabolism	2.02e-17
341	Yersinia_infection	5.07e-17
203	Neurotrophin_signaling_pathway	6.42e-17
288	Shigellosis	6.67e-17
103	Fat_digestion_and_absorption	1.02e-16
230	Pathogenic_Escherichia_coli_infection	2.78e-16
147	Herpes_simplex_virus_1_infection	8.64e-16
285	Salmonella_infection	1.39e-15
240	Phenylalanine_metabolism	1.85e-15
200	Necroptosis	2.1e-15
209	NOD-like_receptor_signaling_pathway	2.35e-15
3	Acute_myeloid_leukemia	4.65e-15
319	Toll-like_receptor_signaling_pathway	7.94e-15
231	Pathways_in_cancer	1.14e-14
150	Hippo_signaling_pathway_-_multiple_species	1.81e-14
331	Vascular_smooth_muscle_contraction	3.13e-14
199	Natural_killer_cell_mediated_cytotoxicity	4.73e-14
310	Th1_and_Th2_cell_differentiation	7.19e-14
248	Porphyrin_and_chlorophyll_metabolism	1e-13
34	Autophagy_-_animal	1.02e-13
326	Tyrosine_metabolism	1.95e-13
283	RNA_transport	2.13e-13
197	Mucin_type_O-glycan_biosynthesis	5.14e-13
126	Glycerophospholipid_metabolism	7.17e-13
255	Propanoate_metabolism	7.44e-13
256	Prostate_cancer	1.28e-12
107	Fatty_acid_metabolism	1.44e-12
232	Pathways_of_neurodegeneration_-_multiple_diseases	2.3e-12
110	Ferroptosis	2.79e-12
17	Aminoacyl-tRNA_biosynthesis	4.67e-12
233	PD-L1_expression_and_PD-1_checkpoint_pathway_in_cancer	4.69e-12
184	Maturity_onset_diabetes_of_the_young	5.89e-12
69	Chronic_myeloid_leukemia	7.37e-12
260	Protein_processing_in_endoplasmic_reticulum	7.69e-12
151	Histidine_metabolism	1.51e-11
24	Apelin_signaling_pathway	1.63e-11
148	HIF-1_signaling_pathway	1.97e-11
21	Amyotrophic_lateral_sclerosis	2.45e-11
80	Cysteine_and_methionine_metabolism	3.19e-11
26	Apoptosis_-_multiple_species	4.53e-11
137	Glyoxylate_and_dicarboxylate_metabolism	5.72e-11
5	Adipocytokine_signaling_pathway	6.17e-11
303	Synthesis_and_degradation_of_ketone_bodies	7.31e-11
63	Chagas_disease	7.62e-11
267	Ras_signaling_pathway	8.43e-11
244	Phototransduction	8.82e-11
243	Phosphonate_and_phosphinate_metabolism	1.12e-10
216	One_carbon_pool_by_folate	2.61e-10
61	Central_carbon_metabolism_in_cancer	2.75e-10
44	Biosynthesis_of_amino_acids	5.39e-10
14	alpha-Linolenic_acid_metabolism	5.44e-10
31	Ascorbate_and_aldarate_metabolism	1.14e-09
83	D-Arginine_and_D-ornithine_metabolism	1.67e-09
178	Longevity_regulating_pathway_-_multiple_species	1.71e-09
270	Relaxin_signaling_pathway	2.37e-09
105	Fatty_acid_degradation	3.02e-09
190	MicroRNAs_in_cancer	3.7e-09
51	C-type_lectin_receptor_signaling_pathway	4.53e-09
96	Endometrial_cancer	8.65e-09
193	Mitophagy_-_animal	1.75e-08
222	Oxidative_phosphorylation	2.43e-08
179	Lysine_degradation	2.93e-08
282	RNA_polymerase	4.11e-08
7	African_trypanosomiasis	5.98e-08
173	Linoleic_acid_metabolism	1.99e-07
149	Hippo_signaling_pathway	2.15e-07
268	Regulation_of_actin_cytoskeleton	2.71e-07
246	Platelet_activation	2.84e-07
153	Human_cytomegalovirus_infection	3.83e-07
253	Progesterone-mediated_oocyte_maturation	3.85e-07
97	Epithelial_cell_signaling_in_Helicobacter_pylori_infection	4.13e-07
328	Ubiquitin_mediated_proteolysis	4.38e-07
195	mRNA_surveillance_pathway	5.53e-07
213	Notch_signaling_pathway	5.57e-07
292	Sphingolipid_metabolism	6.58e-07
106	Fatty_acid_elongation	9.7e-07
211	Non-homologous_end-joining	1.25e-06
299	Steroid_hormone_biosynthesis	1.45e-06
37	B_cell_receptor_signaling_pathway	1.55e-06
189	Metabolism_of_xenobiotics_by_cytochrome_P450	1.77e-06
92	EGFR_tyrosine_kinase_inhibitor_resistance	2.35e-06
229	Parkinson_disease	2.51e-06
217	Oocyte_meiosis	4.85e-06
47	Biotin_metabolism	6.6e-06
281	RNA_degradation	7.64e-06
338	Vitamin_B6_metabolism	9.46e-06
239	Phenylalanine	1.42e-05
66	Cholesterol_metabolism	1.48e-05
295	Spliceosome	2.88e-05
64	Chemical_carcinogenesis	6.13e-05
188	Metabolic_pathways	7.57e-05
236	Peroxisome	0.000129498
58	Cell_adhesion_molecules	0.000147902
89	Drug_metabolism_-_cytochrome_P450	0.00015474
130	Glycosaminoglycan_biosynthesis_-_heparan_sulfate_/_heparin	0.000174276
309	TGF-beta_signaling_pathway	0.000229612
2	ABC_transporters	0.00030181
35	Autophagy_-_other	0.000473326
300	Sulfur_metabolism	0.000496672
317	Tight_junction	0.000502232
271	Renal_cell_carcinoma	0.000525769
109	Fc_gamma_R-mediated_phagocytosis	0.000645084
113	Folate_biosynthesis	0.000701467
101	Ether_lipid_metabolism	0.00159419
1	2-Oxocarboxylic_acid_metabolism	0.00166895
4	Adherens_junction	0.00175047
206	Nicotinate_and_nicotinamide_metabolism	0.00199453
129	Glycosaminoglycan_biosynthesis_-_chondroitin_sulfate_/_dermatan_sulfate	0.00227585
279	Ribosome_biogenesis_in_eukaryotes	0.00234425
158	Hypertrophic_cardiomyopathy	0.00266695
72	Citrate_cycle_(TCA_cycle)	0.00266766
127	Glycine	0.0038264
308	Terpenoid_backbone_biosynthesis	0.0045137
86	Dilated_cardiomyopathy	0.00510962
212	Non-small_cell_lung_cancer	0.00570036
121	Glioma	0.00576032
191	Mineral_absorption	0.006746
75	Colorectal_cancer	0.00908749
274	Retinol_metabolism	0.00938126
135	Glycosphingolipid_biosynthesis_-_lacto_and_neolacto_series	0.0121215
65	Chemokine_signaling_pathway	0.0141243
49	Breast_cancer	0.0186856
30	Arrhythmogenic_right_ventricular_cardiomyopathy	0.0188259
249	PPAR_signaling_pathway	0.0207858
334	Vibrio_cholerae_infection	0.0232963
298	Steroid_biosynthesis	0.0235604
333	VEGF_signaling_pathway	0.0280411
314	Thyroid_cancer	0.0343349
263	Purine_metabolism	0.039002
291	SNARE_interactions_in_vesicular_transport	0.0398941
114	FoxO_signaling_pathway	0.0427503
39	Basal_cell_carcinoma	0.0591769
40	Basal_transcription_factors	0.0762684
250	Primary_bile_acid_biosynthesis	0.0781067
166	Insulin_signaling_pathway	0.0901134
94	Endocrine_resistance	0.0908222
313	Thiamine_metabolism	0.10162
120	Gastric_cancer	0.11426
56	Carbon_metabolism	0.121579
286	Selenocompound_metabolism	0.12995
108	Fc_epsilon_RI_signaling_pathway	0.134986
312	Thermogenesis	0.144288
52	Caffeine_metabolism	0.144973
46	Biosynthesis_of_unsaturated_fatty_acids	0.151311
10	Alcoholism	0.155605
174	Lipoic_acid_metabolism	0.168919
157	Huntington_disease	0.193012
38	Bacterial_invasion_of_epithelial_cells	0.197693
164	Insulin_resistance	0.20308
28	Arginine_and_proline_metabolism	0.268447
339	Vitamin_digestion_and_absorption	0.307673
15	Alzheimer_disease	0.355276
301	Sulfur_relay_system	0.365553
329	Valine	0.425847
146	Hepatocellular_carcinoma	0.530765
220	Other_types_of_O-glycan_biosynthesis	0.61185
305	T_cell_receptor_signaling_pathway	0.639101
29	Arginine_biosynthesis	0.743216
74	Collecting_duct_acid_secretion	0.804388
183	MAPK_signaling_pathway	0.904237
254	Prolactin_signaling_pathway	0.926716
266	Rap1_signaling_pathway	0.953131
322	Tryptophan_metabolism	0.968257
