# Supplementary material for: Development and validation of a two glycolysis-related LncRNAs prognostic signature for glioma and in vitro analyses
Source: Cell Div. 2023 Jun 24;18:10. doi: 10.1186/s13008-023-00092-9 (PMC10290322; doi:10.1186/s13008-023-00092-9)
Supplement: Supplementary file 7 — Additional file7. Differentially expressed glycolysis-related lncRNAs between Cluster1 and Cluster2.( |log2 (fold change)| > 2 and P_value < 0.05). [file 13008_2023_92_MOESM7_ESM.xlsx]

## Sheet: TCGA.lnc.diffSig
	logFC	AveExpr	t	P.Value	adj.P.Val	B
FLJ16779	2.18009	3.87912	16.0678	4.37047e-49	1.66125e-46	100.188
AL390755.1	-2.14183	3.02573	-16.0549	5.06656e-49	1.87516e-46	100.041
