# Supplementary material for: Development and validation of a two glycolysis-related LncRNAs prognostic signature for glioma and in vitro analyses
Source: Cell Div. 2023 Jun 24;18:10. doi: 10.1186/s13008-023-00092-9 (PMC10290322; doi:10.1186/s13008-023-00092-9)
Supplement: Supplementary file 8 — Additional file 8. Risk score-related differentially expressed genes between high- and low-risk groups. [file 13008_2023_92_MOESM8_ESM.xlsx]

## Sheet: TCGA.high.low.sig
SYMBOL	logFC	AveExpr	t	P.Value	adj.P.Val	B
CHI3L1	4.92055	4.49658	23.2562	2.54e-85	1.22e-81	183.753
TIMP1	3.45226	4.51841	24.4227	1.8e-91	1.76e-87	197.831
IGFBP2	3.19158	3.29562	22.9587	9.38e-84	3.06e-80	180.164
EMP3	3.00906	3.06978	24.7095	5.52e-93	1.08e-88	201.291
PDPN	2.92604	3.0958	20.9252	4.39e-73	4.53e-70	155.738
METTL7B	2.91654	3.31108	22.2084	8.32e-80	2.04e-76	171.128
ANXA1	2.78218	3.59279	23.2392	3.12e-85	1.22e-81	183.547
LTF	2.70582	1.83617	15.3979	3.41e-45	1.11e-43	91.9092
CHI3L2	2.55608	3.17355	17.9892	5.71e-58	7.22e-56	121.141
SERPINE1	2.43943	3.05293	17.9915	5.56e-58	7.07e-56	121.168
TNFRSF12A	2.41121	2.97832	21.8677	5.11e-78	1.11e-74	167.033
NNMT	2.2713	1.83782	17.6776	2.13e-56	2.25e-54	117.546
RBP1	2.26932	2.61017	19.6823	1.26e-66	6.15e-64	140.959
RARRES2	2.26024	2.21522	18.8261	3.17e-62	6.97e-60	130.883
FMOD	2.23791	1.93663	18.6022	4.41e-61	8.55e-59	128.265
COL4A1	2.23311	3.30588	18.1853	5.81e-59	8.62e-57	123.413
FABP5	2.20895	2.27624	18.5143	1.24e-60	2.31e-58	127.24
TAGLN2	2.19897	5.30508	23.4411	2.69e-86	1.76e-82	185.983
POSTN	2.19862	1.29072	15.0486	1.57e-43	4.35e-42	88.104
ANXA2	2.15646	3.21442	21.0573	8.97e-74	1.03e-70	157.317
COL3A1	2.14573	2.44167	15.2864	1.16e-44	3.55e-43	90.6899
VIM	2.10844	7.2231	18.2934	1.64e-59	2.59e-57	124.669
AEBP1	2.08961	4.45784	15.0274	1.98e-43	5.43e-42	87.8753
PLP2	2.06383	3.68774	20.4839	8.77e-71	7e-68	150.473
S100A4	2.03846	2.58521	19.0689	1.81e-63	4.99e-61	133.729
COL6A2	2.02886	2.8165	16.721	1.25e-51	7.96e-50	106.633
COL4A2	2.02377	3.52392	18.3367	9.9e-60	1.59e-57	125.172
COL1A1	2.01451	2.16608	15.196	3.14e-44	9.13e-43	89.7053
CLIC1	1.99708	4.8198	21.4297	1.01e-75	1.52e-72	161.777
LGALS3	1.99291	3.91138	18.4498	2.63e-60	4.62e-58	126.488
STEAP3	1.9702	2.36185	21.6205	1.01e-76	1.8e-73	164.064
MOXD1	1.96978	1.58172	17.1354	1.1e-53	8.65e-52	111.336
MEOX2	1.96479	1.20882	16.9995	5.21e-53	3.72e-51	109.79
SERPING1	1.95951	4.1207	20.1664	3.91e-69	2.64e-66	146.697
SOCS3	1.94839	2.79911	15.2193	2.43e-44	7.15e-43	89.9585
IGFBP3	1.94657	3.68353	15.3949	3.53e-45	1.14e-43	91.8758
SPP1	1.90516	7.86566	13.0743	1.8e-34	2.33e-33	67.3968
OCIAD2	1.90401	2.2261	17.7024	1.6e-56	1.74e-54	117.832
HLA-DRA	1.89176	7.36451	14.9103	7.09e-43	1.86e-41	86.6085
SAA1	1.89158	1.03462	13.2981	1.82e-35	2.57e-34	69.6687
MGP	1.86844	3.27222	14.5648	2.97e-41	6.82e-40	82.8998
IL13RA2	1.8553	1.5572	15.682	1.47e-46	5.45e-45	95.0304
PDLIM4	1.84898	1.85401	17.4921	1.82e-55	1.71e-53	115.415
S100A11	1.83556	5.73454	17.6468	3.04e-56	3.13e-54	117.192
MMP9	1.83419	1.24992	14.8718	1.08e-42	2.76e-41	86.1936
FCGBP	1.82626	2.8463	13.9914	1.33e-38	2.41e-37	76.8362
COL1A2	1.81662	2.65287	16.1969	4.68e-49	2.26e-47	100.746
LGALS1	1.80505	6.58788	19.9937	3.08e-68	1.82e-65	144.647
SRPX2	1.80162	1.69689	19.4159	2.97e-65	1.08e-62	137.814
CXCL10	1.79343	1.58393	14.9257	5.99e-43	1.59e-41	86.7756
C1R	1.78308	3.78311	17.3499	9.35e-55	8.17e-53	113.786
RAB34	1.78126	2.56699	19.9543	4.92e-68	2.83e-65	144.179
SEC61G	1.7777	4.78508	14.2512	8.49e-40	1.72e-38	79.5693
PLAT	1.77602	2.27478	20.0034	2.74e-68	1.68e-65	144.762
AQP1	1.76982	6.1556	11.4117	2.19e-27	1.67e-26	51.2221
CD163	1.76931	2.51208	13.4596	3.45e-36	5.1e-35	71.3216
MSN	1.75975	4.90657	21.348	2.71e-75	3.79e-72	160.798
S100A9	1.75295	3.41644	12.0381	5.47e-30	4.98e-29	57.1617
TNFAIP6	1.75254	1.41475	19.6531	1.78e-66	7.73e-64	140.614
ADM	1.74803	1.99068	15.8632	1.96e-47	7.84e-46	97.0323
MAOB	1.73429	4.6033	12.1618	1.64e-30	1.56e-29	58.3573
PTX3	1.7336	1.65219	15.962	6.51e-48	2.78e-46	98.1285
TUBA1C	1.72561	2.43809	18.9992	4.12e-63	1.05e-60	132.912
G0S2	1.72417	1.46158	17.2238	3.99e-54	3.29e-52	112.345
SERPINH1	1.71017	3.2602	19.7588	5.05e-67	2.67e-64	141.864
EFEMP2	1.67771	2.70575	19.8534	1.64e-67	8.91e-65	142.983
PLA2G2A	1.66996	0.944322	13.1177	1.16e-34	1.52e-33	67.8354
FCGR3A	1.66583	4.08427	14.0372	8.22e-39	1.53e-37	77.3158
GPNMB	1.6596	2.71777	14.6956	7.25e-42	1.76e-40	84.2995
SPOCD1	1.65553	1.6217	14.9093	7.16e-43	1.88e-41	86.5978
GNG12	1.65325	3.52605	18.961	6.46e-63	1.6e-60	132.463
COL5A2	1.64754	2.23808	18.0622	2.44e-58	3.32e-56	121.987
MCUB	1.64677	1.84603	21.1506	2.92e-74	3.81e-71	158.434
CA3	1.64323	1.30705	14.6863	8.01e-42	1.93e-40	84.1995
HLA-DRB1	1.64205	6.29903	13.6884	3.2e-37	5.11e-36	73.6808
BGN	1.63343	5.28411	17.3098	1.48e-54	1.27e-52	113.327
CD248	1.629	2.03713	17.87	2.28e-57	2.73e-55	119.764
DIRAS3	1.62869	2.20951	17.6199	4.15e-56	4.17e-54	116.882
PDLIM1	1.62203	2.1963	18.3817	5.85e-60	9.79e-58	125.695
S100A6	1.61861	7.4978	18.7328	9.5e-62	1.98e-59	129.791
ALOX5AP	1.61513	3.55643	15.0364	1.8e-43	4.94e-42	87.9722
IGFBP5	1.61303	5.73826	16.5133	1.32e-50	7.43e-49	104.292
NAMPT	1.59488	3.41308	17.6879	1.89e-56	2.03e-54	117.665
SPRY4	1.58875	2.42866	15.3051	9.47e-45	2.91e-43	90.894
PLA2G5	1.58602	1.64676	15.7904	4.42e-47	1.7e-45	96.227
FSTL1	1.58453	3.4406	20.9017	5.82e-73	5.7e-70	155.458
VEGFA	1.57882	2.46698	14.7029	6.7e-42	1.64e-40	84.3776
SOD2	1.57741	4.25327	17.0783	2.12e-53	1.61e-51	110.686
HLA-DPB1	1.57559	4.77205	14.217	1.22e-39	2.44e-38	79.2073
HSPB6	1.57526	3.4236	15.5196	8.91e-46	3.05e-44	93.2426
PLAU	1.57335	2.02028	15.5166	9.21e-46	3.13e-44	93.2095
HLA-DPA1	1.57314	4.20574	14.0621	6.32e-39	1.18e-37	77.5773
ABCC3	1.56977	1.03655	17.8172	4.22e-57	4.89e-55	119.154
GDF15	1.56524	1.10651	18.8435	2.58e-62	5.74e-60	131.087
VASN	1.56207	1.73939	18.8778	1.72e-62	4.02e-60	131.488
GBP1	1.55788	2.63011	16.1658	6.63e-49	3.15e-47	100.398
EMP1	1.5523	3.76035	15.5429	6.88e-46	2.4e-44	93.4992
EMILIN3	1.55209	1.52183	14.0757	5.47e-39	1.03e-37	77.7204
CAPG	1.55087	4.13542	16.6385	3.19e-51	1.94e-49	105.703
FLNC	1.54326	2.51193	14.8747	1.04e-42	2.69e-41	86.2244
LYZ	1.53886	2.33195	12.9888	4.3e-34	5.39e-33	66.534
MMP14	1.53178	3.95915	15.8993	1.31e-47	5.4e-46	97.4325
HSPB1	1.53099	6.21433	18.4724	2.02e-60	3.67e-58	126.751
CD74	1.52561	7.74061	13.6303	5.87e-37	9.18e-36	73.0797
PCOLCE	1.51897	2.1318	17.1455	9.8e-54	7.76e-52	111.451
SMIM3	1.51303	3.26904	18.7907	4.81e-62	1.03e-59	130.468
CD44	1.51035	4.42327	14.765	3.42e-42	8.46e-41	85.0443
APOL4	1.50277	1.67133	15.5494	6.4e-46	2.25e-44	93.5701
PLEKHA4	1.50011	3.08092	15.9112	1.15e-47	4.77e-46	97.5645
LDHA	1.49583	4.78326	17.3585	8.47e-55	7.51e-53	113.884
FKBP9	1.49431	3.34926	19.001	4.03e-63	1.04e-60	132.933
CDKN2C	1.48219	3.28854	15.6729	1.63e-46	6e-45	94.9296
CDC20	1.48116	2.16744	13.956	1.94e-38	3.44e-37	76.4655
TGFB2	1.48106	2.28976	16.0281	3.11e-48	1.38e-46	98.8632
C1S	1.47924	3.40466	15.9102	1.16e-47	4.81e-46	97.554
FABP7	1.47855	4.85249	11.9265	1.61e-29	1.41e-28	56.0893
KLHDC8A	1.47143	3.63589	14.3927	1.88e-40	4.05e-39	81.0675
RGS16	1.46879	2.41356	16.0754	1.83e-48	8.35e-47	99.3897
SPRY1	1.46509	2.18639	19.1848	4.59e-64	1.36e-61	135.092
SFRP4	1.45473	2.03965	15.3434	6.22e-45	1.94e-43	91.3124
GADD45A	1.45206	4.165	17.6567	2.71e-56	2.82e-54	117.305
S100A10	1.45139	5.2794	12.7506	4.77e-33	5.49e-32	64.1478
KIAA0040	1.44762	2.03448	18.9466	7.65e-63	1.87e-60	132.295
MDK	1.44491	4.29798	13.1706	6.75e-35	9.08e-34	68.3714
CAV1	1.44271	3.10836	14.9184	6.49e-43	1.71e-41	86.6961
F3	1.44244	4.52035	14.2302	1.06e-39	2.13e-38	79.3475
CAVIN1	1.43575	4.24217	18.0883	1.8e-58	2.52e-56	122.288
SOD3	1.43515	1.9515	18.173	6.71e-59	9.88e-57	123.27
TNC	1.43404	4.55811	13.9716	1.64e-38	2.94e-37	76.6283
FN1	1.43295	4.52236	15.5845	4.34e-46	1.55e-44	93.9566
ACTN1	1.42652	3.26208	17.1655	7.79e-54	6.22e-52	111.679
CXCL8	1.42348	1.47095	11.0401	6.99e-26	4.78e-25	47.794
PSRC1	1.42271	4.01857	16.8321	3.52e-52	2.34e-50	107.891
OSMR	1.4223	2.04916	19.3941	3.85e-65	1.37e-62	137.556
MYL12A	1.41854	3.90566	21.4396	8.98e-76	1.47e-72	161.895
UBE2C	1.4128	2.70629	10.9586	1.48e-25	9.9e-25	47.052
TSTD1	1.41081	1.83969	14.7679	3.32e-42	8.21e-41	85.0757
CFI	1.41009	2.38657	15.2479	1.77e-44	5.3e-43	90.2705
IFITM3	1.40689	6.40291	15.6096	3.29e-46	1.18e-44	94.2323
BCAT1	1.39884	1.84057	16.6026	4.79e-51	2.86e-49	105.297
RAB32	1.39429	2.87852	17.6444	3.12e-56	3.2e-54	117.164
HOXA5	1.39376	0.825968	16.0807	1.72e-48	7.9e-47	99.449
ARL4C	1.3914	3.69817	15.855	2.15e-47	8.52e-46	96.9421
PTTG1	1.38832	2.42074	14.3059	4.75e-40	9.9e-39	80.147
HLA-DQA1	1.38368	2.03976	13.572	1.08e-36	1.65e-35	72.4781
SERPINA1	1.38226	2.31388	14.2687	7.06e-40	1.45e-38	79.7534
PI3	1.37607	0.928145	10.9327	1.88e-25	1.25e-24	46.8171
CD58	1.37602	2.05422	20.6416	1.32e-71	1.13e-68	152.353
HLA-DRB5	1.3722	4.66176	10.6989	1.57e-24	9.85e-24	44.7114
DMRTA2	1.36347	0.878361	16.0579	2.23e-48	1.01e-46	99.1946
MYBL2	1.35767	2.02195	11.4446	1.61e-27	1.24e-26	51.5288
LOX	1.35457	1.20408	15.6129	3.17e-46	1.14e-44	94.269
NPNT	1.35234	1.75542	14.0371	8.23e-39	1.53e-37	77.3144
TGFBI	1.34305	2.64014	11.2436	1.06e-26	7.68e-26	49.6623
BIRC5	1.3426	2.10428	11.8237	4.35e-29	3.72e-28	55.107
FBXO17	1.342	1.37239	19.3828	4.4e-65	1.51e-62	137.422
IBSP	1.34193	0.871434	12.3704	2.11e-31	2.13e-30	60.3908
PYGL	1.34041	2.75656	18.8924	1.45e-62	3.47e-60	131.659
TUBB6	1.33954	2.63998	15.3006	9.95e-45	3.05e-43	90.8448
GPX8	1.33847	0.931784	19.6633	1.58e-66	7.34e-64	140.734
LUM	1.33291	1.41551	14.0708	5.76e-39	1.08e-37	77.6688
MRC2	1.33146	3.44327	15.5948	3.88e-46	1.39e-44	94.0689
PKIB	1.3306	1.35931	17.1183	1.34e-53	1.05e-51	111.142
CXCL14	1.33044	3.40353	8.83326	1.17e-17	4.71e-17	29.08
FGFRL1	1.33018	2.83864	18.1044	1.49e-58	2.1e-56	122.475
DDIT4L	1.32967	1.12488	14.9234	6.14e-43	1.62e-41	86.7508
SLC43A3	1.32875	1.73929	19.2265	2.8e-64	8.7e-62	135.582
S100A8	1.32811	2.01077	11.1613	2.28e-26	1.62e-25	48.9043
RNASE2	1.32663	1.85675	13.2297	3.68e-35	5.08e-34	68.9724
LAMC1	1.32637	3.05013	19.6637	1.57e-66	7.34e-64	140.739
CCL2	1.32477	3.1856	9.96023	1.06e-21	5.53e-21	38.267
CCNB1	1.32369	2.63696	15.1792	3.77e-44	1.09e-42	89.5226
TMSB4X	1.32264	9.00613	18.513	1.26e-60	2.32e-58	127.225
HLA-DQB1	1.32136	2.69841	11.9833	9.31e-30	8.29e-29	56.6342
MT1M	1.32106	3.28838	13.3856	7.41e-36	1.07e-34	70.5627
DEPP1	1.32048	3.75781	16.0886	1.58e-48	7.29e-47	99.5365
TMSB10	1.31817	9.34778	16.5122	1.33e-50	7.51e-49	104.28
TMEM158	1.31492	3.44248	12.8566	1.64e-33	1.96e-32	65.2064
FAM181A	1.30134	1.97085	13.865	5.04e-38	8.66e-37	75.5155
ITGA5	1.29547	2.13022	18.6057	4.23e-61	8.28e-59	128.306
GNG5	1.29116	5.29038	18.1433	9.49e-59	1.37e-56	122.926
CTHRC1	1.28947	1.29724	14.6713	9.42e-42	2.26e-40	84.0389
TMEM176B	1.2844	4.27005	12.3466	2.66e-31	2.67e-30	60.158
CA9	1.27478	1.00839	12.3531	2.5e-31	2.51e-30	60.2209
LSP1	1.27382	1.51142	17.7033	1.58e-56	1.73e-54	117.841
TYMP	1.27196	2.19584	13.2069	4.65e-35	6.35e-34	68.7403
MSR1	1.27142	1.80364	14.8755	1.03e-42	2.67e-41	86.2336
HMOX1	1.259	4.24143	13.0273	2.91e-34	3.69e-33	66.9221
DPYD	1.25891	1.68325	17.7783	6.62e-57	7.58e-55	118.706
APOBEC3C	1.25662	2.55321	17.1156	1.38e-53	1.07e-51	111.11
ANXA5	1.25631	6.57373	19.1132	1.07e-63	3.13e-61	134.25
TMBIM1	1.25443	3.95087	17.9787	6.45e-58	8.05e-56	121.02
HOPX	1.24816	3.35132	11.2377	1.12e-26	8.09e-26	49.608
LIF	1.24238	0.954024	14.8256	1.78e-42	4.47e-41	85.6955
COL5A1	1.23851	1.12071	15.133	6.25e-44	1.78e-42	89.0202
C1RL	1.23706	1.87824	18.1465	9.14e-59	1.33e-56	122.963
TNFRSF1A	1.23678	4.17407	17.521	1.3e-55	1.25e-53	115.746
RRM2	1.23632	1.8096	12.1826	1.34e-30	1.28e-29	58.559
IGFBP7	1.23529	7.19099	16.2261	3.37e-49	1.65e-47	101.071
IFI6	1.23466	6.69047	11.0969	4.14e-26	2.88e-25	48.3129
PDGFA	1.23327	3.05211	15.652	2.06e-46	7.54e-45	94.6989
LAMB1	1.23177	2.26722	14.8795	9.9e-43	2.57e-41	86.2764
CEBPD	1.23151	3.7756	12.8383	1.97e-33	2.33e-32	65.0235
PLSCR1	1.23124	2.63224	16.7989	5.14e-52	3.38e-50	107.515
PPIC	1.22642	2.17278	19.0407	2.52e-63	6.76e-61	133.399
FCER1G	1.22109	4.78234	12.62	1.77e-32	1.93e-31	62.8492
ANGPT2	1.21558	1.60039	15.5545	6.05e-46	2.14e-44	93.6268
CBR1	1.21491	4.46859	11.837	3.83e-29	3.29e-28	55.2331
VAMP5	1.21364	4.96636	15.881	1.61e-47	6.54e-46	97.2296
C21orf62	1.21331	2.00533	12.9219	8.47e-34	1.04e-32	65.8609
SLN	1.21288	1.91906	8.56432	9.54e-17	3.63e-16	27.0109
FAM20C	1.21198	3.99833	16.4526	2.62e-50	1.43e-48	103.61
HOXC10	1.21182	0.666597	14.1654	2.11e-39	4.13e-38	78.6641
TRIP6	1.20098	4.16825	16.5651	7.33e-51	4.31e-49	104.875
F13A1	1.1996	1.77776	9.59144	2.44e-20	1.16e-19	35.1716
CLEC5A	1.19675	0.821704	17.6709	2.3e-56	2.42e-54	117.469
SPINK8	1.19629	1.63709	15.1978	3.08e-44	8.97e-43	89.7244
MS4A6A	1.19416	2.44363	12.2292	8.46e-31	8.18e-30	59.0125
ADGRE5	1.19283	2.29576	17.1839	6.3e-54	5.08e-52	111.889
TCIM	1.19003	3.00929	11.2176	1.35e-26	9.71e-26	49.4223
CYTL1	1.18681	2.56334	13.2284	3.73e-35	5.14e-34	68.959
FAM114A1	1.18618	1.93854	21.6237	9.74e-77	1.8e-73	164.103
FCGR2A	1.18041	2.40882	14.2177	1.21e-39	2.42e-38	79.2154
CP	1.1798	1.74095	12.4368	1.09e-31	1.13e-30	61.0419
TM4SF1	1.17966	2.64063	13.6406	5.27e-37	8.28e-36	73.186
PTGFRN	1.17879	3.20502	16.1228	1.07e-48	5.03e-47	99.9185
TYMS	1.17233	2.87127	12.301	4.17e-31	4.13e-30	59.7123
ASF1B	1.17207	1.81605	12.8381	1.98e-33	2.34e-32	65.0209
FKBP10	1.17156	4.4807	15.4211	2.64e-45	8.68e-44	92.1622
ARAP3	1.16985	1.95378	17.7943	5.5e-57	6.33e-55	118.89
UPP1	1.1662	2.22301	17.245	3.13e-54	2.63e-52	112.587
SOCS2	1.1633	1.68288	14.2521	8.41e-40	1.71e-38	79.5787
SHOX2	1.16209	0.703098	16.7494	9.04e-52	5.8e-50	106.955
H2BC12	1.16169	3.26849	14.6276	1.51e-41	3.53e-40	83.5713
FOXJ1	1.15818	2.35557	10.8559	3.79e-25	2.46e-24	46.1217
BST2	1.15746	5.13108	12.2297	8.42e-31	8.14e-30	59.0171
SLC2A10	1.15721	1.74468	17.0443	3.12e-53	2.31e-51	110.299
TNFRSF11B	1.15552	0.915992	18.3803	5.94e-60	9.86e-58	125.679
COL8A1	1.1546	0.781804	15.5767	4.73e-46	1.68e-44	93.8705
CD151	1.15398	4.68631	17.6819	2.02e-56	2.17e-54	117.595
RDH10	1.15333	2.28133	13.9631	1.8e-38	3.2e-37	76.5396
PINLYP	1.15263	1.0583	19.6952	1.08e-66	5.41e-64	141.111
IGF2BP2	1.1522	0.821833	15.3771	4.29e-45	1.37e-43	91.6814
CDCA8	1.15082	1.61921	13.6634	4.16e-37	6.59e-36	73.4215
AQP5	1.1502	0.739052	16.9396	1.03e-52	7.31e-51	109.109
NGFR	1.14978	2.16826	12.6002	2.15e-32	2.34e-31	62.6534
EMILIN1	1.14941	3.16628	15.9652	6.29e-48	2.69e-46	98.1638
HLA-DMA	1.14259	3.8769	12.7413	5.23e-33	6e-32	64.0547
XKR8	1.14051	1.66367	18.4079	4.3e-60	7.46e-58	126
CLCF1	1.13871	1.09861	15.9933	4.59e-48	2e-46	98.4763
PLAUR	1.13839	1.50585	15.4634	1.66e-45	5.54e-44	92.6259
SEL1L3	1.13707	1.60187	14.2632	7.47e-40	1.53e-38	79.6962
CCNB2	1.13697	1.65767	12.4262	1.21e-31	1.25e-30	60.9376
C3	1.13566	5.64446	9.73519	7.27e-21	3.57e-20	36.3682
HLA-DOA	1.13541	2.39658	12.0501	4.87e-30	4.45e-29	57.2775
LY96	1.13433	2.7835	13.151	8.24e-35	1.1e-33	68.1724
CALU	1.13395	4.73393	17.8692	2.3e-57	2.73e-55	119.755
FBLN5	1.13352	2.18696	14.27	6.95e-40	1.43e-38	79.7679
ZYX	1.13223	5.4858	17.3926	5.72e-55	5.13e-53	114.275
LRRN4CL	1.12864	1.29595	14.5912	2.23e-41	5.17e-40	83.1823
LOXL2	1.12808	1.96617	13.6849	3.32e-37	5.29e-36	73.6447
LOXL1	1.1271	1.01134	16.2752	1.94e-49	9.73e-48	101.62
MFAP4	1.12698	3.23573	12.2728	5.51e-31	5.41e-30	59.4372
MCAM	1.1264	3.31034	16.8131	4.38e-52	2.9e-50	107.675
TEAD3	1.12564	1.36848	19.4633	1.69e-65	6.26e-63	138.372
CA2	1.12524	4.87722	12.1609	1.65e-30	1.57e-29	58.3489
HILPDA	1.12403	3.15911	13.5794	9.97e-37	1.53e-35	72.5535
CD93	1.12377	2.22294	13.3533	1.03e-35	1.48e-34	70.2324
CCN1	1.1235	4.01151	8.87847	8.18e-18	3.33e-17	29.4327
WEE1	1.1231	1.64958	17.8543	2.74e-57	3.21e-55	119.583
ITGA7	1.12241	3.88898	14.2095	1.32e-39	2.62e-38	79.1291
TEAD2	1.1217	2.0528	15.3744	4.42e-45	1.41e-43	91.6517
CD63	1.11891	7.37762	19.3352	7.74e-65	2.61e-62	136.862
MEST	1.11707	3.90177	11.8579	3.13e-29	2.7e-28	55.4327
HLA-DQA2	1.11697	1.73251	9.28692	3.04e-19	1.35e-18	32.6801
NUSAP1	1.11331	2.68339	10.1863	1.5e-22	8.25e-22	40.2056
OTOS	1.11329	0.981663	12.1796	1.38e-30	1.32e-29	58.5299
PBK	1.11308	2.11537	10.3312	4.2e-23	2.41e-22	41.4637
HLA-DMB	1.11097	2.83393	12.5898	2.39e-32	2.59e-31	62.5501
EVA1B	1.10665	2.22032	16.5412	9.61e-51	5.53e-49	104.606
ARC	1.10542	3.73405	9.58504	2.57e-20	1.22e-19	35.1187
TK1	1.10427	2.11283	12.2416	7.49e-31	7.29e-30	59.1332
FUCA2	1.1028	3.32767	16.6341	3.35e-51	2.04e-49	105.653
VAV3	1.1027	0.828192	19.0111	3.58e-63	9.34e-61	133.051
KCNE4	1.10232	1.67983	14.0571	6.66e-39	1.24e-37	77.5247
EHD2	1.10028	3.61472	16.4079	4.34e-50	2.34e-48	103.107
ESM1	1.09823	0.782468	13.7073	2.63e-37	4.23e-36	73.8757
CARD16	1.09739	1.25043	16.929	1.17e-52	8.22e-51	108.989
TMEM106C	1.09614	3.59872	17.8713	2.25e-57	2.7e-55	119.779
PIPOX	1.09588	2.72879	13.3992	6.44e-36	9.28e-35	70.7015
CPVL	1.09517	3.08516	12.475	7.48e-32	7.78e-31	61.4171
PLIN2	1.09496	2.33311	15.5452	6.71e-46	2.35e-44	93.5238
NIBAN1	1.09361	1.53779	16.1613	6.97e-49	3.3e-47	100.348
ADAM12	1.09316	0.818184	17.4262	3.88e-55	3.55e-53	114.659
EMILIN2	1.09204	1.15841	16.8721	2.23e-52	1.51e-50	108.344
ISG15	1.09159	4.86194	9.44911	7.99e-20	3.69e-19	33.9997
ATF3	1.09077	2.43104	12.5391	3.95e-32	4.21e-31	62.0497
HSPA6	1.09062	1.49384	11.0627	5.68e-26	3.91e-25	47.9998
TMEM176A	1.09033	2.86685	11.3407	4.27e-27	3.17e-26	50.5616
TGIF1	1.09002	1.79025	19.8632	1.46e-67	8.15e-65	143.1
SDC4	1.08772	4.1349	9.05917	1.93e-18	8.19e-18	30.8558
TOP2A	1.0875	2.56187	8.85943	9.51e-18	3.85e-17	29.284
MARVELD1	1.08726	2.04992	16.3982	4.84e-50	2.6e-48	102.998
CPQ	1.08704	2.61107	16.4865	1.79e-50	9.93e-49	103.99
S100A13	1.08658	3.33449	13.0238	3.01e-34	3.82e-33	66.8863
MAP3K7CL	1.08558	1.06124	17.2256	3.9e-54	3.24e-52	112.366
EVA1C	1.08485	1.86415	17.9838	6.09e-58	7.64e-56	121.078
KIF2C	1.08357	1.62947	12.692	8.58e-33	9.67e-32	63.5641
PIMREG	1.08286	1.88768	10.4945	9.86e-24	5.86e-23	42.8966
IL1RAP	1.08278	1.63013	14.2196	1.19e-39	2.38e-38	79.2352
DUSP6	1.08232	3.11559	13.7492	1.7e-37	2.78e-36	74.3109
S100A3	1.08214	1.3813	12.8857	1.22e-33	1.48e-32	65.4975
C1QB	1.079	6.71378	10.1352	2.34e-22	1.27e-21	39.765
EFEMP1	1.07891	5.0018	10.2734	6.98e-23	3.94e-22	40.9602
FOSL1	1.07791	1.27489	14.6674	9.83e-42	2.35e-40	83.9967
IQGAP1	1.07702	2.9313	18.0193	4.03e-58	5.29e-56	121.489
OLFML3	1.07651	3.83815	13.5132	1.98e-36	2.98e-35	71.8718
FLNA	1.07582	5.16606	14.327	3.79e-40	7.98e-39	80.3706
GPX7	1.07466	2.75275	16.7503	8.94e-52	5.76e-50	106.965
C9orf64	1.0729	1.93961	15.955	7.04e-48	2.98e-46	98.0514
KDELR3	1.0715	1.06482	16.369	6.73e-50	3.53e-48	102.671
TPX2	1.06991	2.63493	10.3293	4.27e-23	2.44e-22	41.4472
SLC11A1	1.0685	1.77879	12.4968	6.02e-32	6.31e-31	61.6319
RAB42	1.06843	1.06672	18.6446	2.68e-61	5.41e-59	128.76
GBP2	1.06732	2.57803	10.9699	1.33e-25	8.96e-25	47.154
B3GNT7	1.06606	1.02252	17.4926	1.81e-55	1.71e-53	115.42
THBS1	1.06552	1.39811	11.1247	3.2e-26	2.24e-25	48.5675
CCDC8	1.06356	1.1784	15.0548	1.47e-43	4.07e-42	88.1714
MAP1LC3C	1.06077	0.67602	17.0579	2.67e-53	1.99e-51	110.454
CKS2	1.05968	4.02266	11.2574	9.32e-27	6.78e-26	49.7895
IGFBP4	1.05866	4.42033	11.6855	1.64e-28	1.35e-27	53.7936
SERPINA5	1.05696	0.693451	16.2106	4.01e-49	1.94e-47	100.898
LGR6	1.05385	0.812259	12.0764	3.77e-30	3.47e-29	57.531
DPY19L1	1.05238	3.66409	18.2909	1.69e-59	2.65e-57	124.639
PDIA4	1.04467	5.098	17.1737	7.09e-54	5.69e-52	111.773
FBLN1	1.04442	2.22202	12.6889	8.86e-33	9.96e-32	63.533
FTL	1.04314	10.6077	14.0494	7.23e-39	1.35e-37	77.4436
HLA-B	1.04282	7.41592	12.5453	3.72e-32	3.97e-31	62.1109
EN1	1.04206	0.693974	15.0261	2.01e-43	5.51e-42	87.8603
TCEA3	1.04115	1.17685	16.4705	2.14e-50	1.18e-48	103.811
SDC1	1.04083	1.45402	13.6088	7.34e-37	1.14e-35	72.8575
ICAM1	1.0399	2.0862	12.2832	4.98e-31	4.9e-30	59.5383
HOXB2	1.0386	0.73218	12.8069	2.7e-33	3.17e-32	64.7096
RHOJ	1.03746	2.50172	16.2136	3.88e-49	1.88e-47	100.932
SPRY2	1.03727	4.37357	15.9531	7.19e-48	3.04e-46	98.03
ACTA2	1.03699	3.3343	11.752	8.66e-29	7.28e-28	54.4243
CXCR4	1.03609	3.73608	12.1471	1.89e-30	1.79e-29	58.2152
TAGLN	1.03576	3.61251	12.2189	9.36e-31	9.01e-30	58.9119
CCNA2	1.03411	1.76521	12.9315	7.69e-34	9.5e-33	65.9574
RPL39L	1.03343	1.59746	13.1336	9.85e-35	1.31e-33	67.9963
DCTD	1.02957	3.53908	15.3599	5.19e-45	1.63e-43	91.4926
ARSD	1.02796	1.72237	18.3508	8.4e-60	1.37e-57	125.335
OAS1	1.02738	2.04796	11.9589	1.18e-29	1.04e-28	56.3997
ITGA3	1.02476	2.29902	13.9531	2e-38	3.53e-37	76.435
RAB36	1.02401	1.52287	14.4345	1.2e-40	2.64e-39	81.5115
DUSP5	1.01939	1.87571	12.1616	1.64e-30	1.56e-29	58.3553
FBLIM1	1.01834	1.49303	13.9234	2.73e-38	4.76e-37	76.1244
GAP43	1.01457	6.55949	9.82661	3.34e-21	1.68e-20	37.1357
C1QA	1.01128	6.41547	9.89229	1.91e-21	9.72e-21	37.6904
TYROBP	1.01123	5.62647	10.7508	9.85e-25	6.24e-24	45.176
HOXB7	1.00947	0.83169	13.7153	2.42e-37	3.9e-36	73.9594
HLA-A	1.00808	7.48331	13.7643	1.45e-37	2.39e-36	74.4676
IQGAP2	1.00798	1.37413	15.6156	3.08e-46	1.11e-44	94.2979
KIF4A	1.00751	1.46403	13.2293	3.7e-35	5.1e-34	68.9679
TNFRSF19	1.00705	2.5803	13.2724	2.38e-35	3.31e-34	69.4068
TENT5A	1.00648	1.71349	18.5657	6.77e-61	1.3e-58	127.839
TPM4	1.00429	4.51967	17.195	5.55e-54	4.49e-52	112.016
MYD88	1.00347	2.74362	15.9474	7.67e-48	3.24e-46	97.9662
UBE2S	1.0033	2.92149	13.4982	2.31e-36	3.46e-35	71.7181
PDLIM3	1.00303	2.11886	14.9648	3.92e-43	1.06e-41	87.1971
STAC	1.00211	0.629541	14.3282	3.74e-40	7.88e-39	80.3833
CD14	1.0005	5.06912	8.97715	3.73e-18	1.55e-17	30.2071
MT1E	1.00009	5.02062	10.1526	2.01e-22	1.1e-21	39.9149
SLC6A1	-1.00074	5.04057	-11.7852	6.3e-29	5.34e-28	54.7396
ADGRB3	-1.00178	3.09041	-16.5812	6.11e-51	3.61e-49	105.056
TF	-1.00201	4.65867	-8.50777	1.47e-16	5.54e-16	26.5822
SMPD3	-1.00294	1.77915	-16.9188	1.31e-52	9.1e-51	108.873
RAP2A	-1.00387	5.12878	-17.1505	9.25e-54	7.36e-52	111.508
SLC1A4	-1.00476	4.52725	-14.1356	2.9e-39	5.59e-38	78.3495
GNAO1	-1.00508	4.64274	-15.8196	3.19e-47	1.25e-45	96.5498
HIPK2	-1.00549	4.89277	-14.6384	1.34e-41	3.15e-40	83.687
SLC7A14	-1.00774	1.8302	-11.9301	1.56e-29	1.37e-28	56.1235
SLC22A6	-1.00899	1.12032	-16.0462	2.54e-48	1.14e-46	99.0644
NALCN	-1.00928	2.41962	-16.1111	1.23e-48	5.7e-47	99.7872
SLC25A27	-1.01012	2.67922	-15.1708	4.13e-44	1.19e-42	89.4315
CD24	-1.01013	4.34889	-8.66074	4.52e-17	1.76e-16	27.7471
NRG3	-1.01035	2.01953	-14.8542	1.3e-42	3.31e-41	86.0044
PPM1L	-1.01365	2.70146	-18.1474	9.05e-59	1.32e-56	122.973
TOX	-1.01615	3.154	-13.7376	1.92e-37	3.11e-36	74.1907
CRLF1	-1.01668	2.57546	-7.65734	7.84e-14	2.49e-13	20.4078
FCHSD2	-1.01673	4.5298	-19.5689	4.84e-66	1.97e-63	139.618
GALNT9	-1.01813	1.62479	-12.539	3.96e-32	4.21e-31	62.0488
PGAP4	-1.01933	2.49687	-13.67	3.88e-37	6.16e-36	73.4903
SYP	-1.02178	4.49726	-11.0817	4.76e-26	3.3e-25	48.1741
MAST1	-1.02207	2.7144	-14.2334	1.03e-39	2.07e-38	79.3807
NECAB2	-1.02321	2.78477	-11.9963	8.21e-30	7.35e-29	56.7591
GPR158	-1.02566	2.70891	-13.5428	1.46e-36	2.21e-35	72.1769
MBP	-1.02637	5.42288	-5.72196	1.68e-08	3.77e-08	8.41149
BCL7A	-1.02693	3.14345	-17.6788	2.1e-56	2.23e-54	117.559
SYT4	-1.02703	2.04402	-8.52117	1.33e-16	5.02e-16	26.6836
RASGEF1C	-1.03138	2.42182	-15.7991	4.01e-47	1.55e-45	96.3235
CRY2	-1.03444	3.71383	-17.306	1.55e-54	1.31e-52	113.283
MAP2	-1.03524	5.6598	-14.1031	4.09e-39	7.78e-38	78.0077
NKAIN1	-1.03579	2.66415	-12.7914	3.16e-33	3.69e-32	64.5543
C1QL1	-1.03594	6.54799	-8.11833	2.78e-15	9.61e-15	23.6904
KCND2	-1.03607	3.26361	-11.6309	2.75e-28	2.23e-27	53.2778
SLC17A7	-1.03692	2.93342	-6.01758	3.12e-09	7.35e-09	10.0481
MOBP	-1.03853	2.87826	-7.03345	5.62e-12	1.58e-11	16.2176
SLC1A1	-1.0386	3.08697	-12.8412	1.92e-33	2.27e-32	65.0516
LCNL1	-1.0401	1.66976	-11.7405	9.67e-29	8.1e-28	54.315
GRIK2	-1.04018	2.80868	-13.3192	1.47e-35	2.09e-34	69.8835
KIF5A	-1.04192	5.12093	-9.41783	1.04e-19	4.75e-19	33.7439
FA2H	-1.04328	2.75845	-9.65295	1.46e-20	7.02e-20	35.682
KLHL32	-1.04443	2.58825	-14.3116	4.47e-40	9.35e-39	80.2078
CAMK2A	-1.04458	2.99991	-6.26114	7.38e-10	1.81e-09	11.4512
TEF	-1.04605	3.7145	-15.8551	2.15e-47	8.52e-46	96.9435
KCNK3	-1.04681	1.55996	-12.8403	1.93e-33	2.29e-32	65.0428
AMOTL2	-1.04768	4.03594	-15.0962	9.34e-44	2.63e-42	88.6208
CAMSAP3	-1.05196	1.78839	-16.1661	6.61e-49	3.15e-47	100.402
STOX1	-1.05209	2.43385	-11.716	1.22e-28	1.02e-27	54.0825
MARCHF8	-1.05243	3.24254	-18.8841	1.6e-62	3.77e-60	131.563
NPPA	-1.05554	2.66027	-9.1862	6.92e-19	3.01e-18	31.8691
PRR36	-1.05911	3.24863	-14.3549	2.81e-40	5.99e-39	80.6667
TMEM179	-1.06071	2.44214	-11.0981	4.09e-26	2.85e-25	48.3239
FXYD6	-1.06151	6.58518	-14.0884	4.78e-39	9.06e-38	77.8536
CSMD3	-1.06775	1.17152	-18.6735	1.91e-61	3.89e-59	129.098
PLP1	-1.06911	7.61442	-8.35138	4.86e-16	1.76e-15	25.4081
CASKIN1	-1.06995	2.50136	-15.3609	5.13e-45	1.62e-43	91.5037
MAPK8IP2	-1.07082	3.84861	-14.2304	1.06e-39	2.13e-38	79.3497
FGF12	-1.0724	2.76767	-14.0338	8.52e-39	1.58e-37	77.2804
GLUD1	-1.07272	6.86183	-20.9742	2.44e-73	2.65e-70	156.324
DDN	-1.07417	2.21026	-7.95207	9.44e-15	3.15e-14	22.4887
RIPPLY2	-1.0748	2.36939	-16.3913	5.23e-50	2.8e-48	102.921
RGS11	-1.07569	2.79518	-13.1065	1.3e-34	1.7e-33	67.7219
NTN4	-1.0769	2.38775	-13.0912	1.52e-34	1.97e-33	67.5676
AATK	-1.07756	3.28066	-12.0709	3.98e-30	3.65e-29	57.4778
PPP2R2C	-1.07874	2.38105	-10.1678	1.76e-22	9.66e-22	40.0457
PLPPR3	-1.07926	1.64318	-13.4508	3.78e-36	5.55e-35	71.2313
SULF2	-1.0801	5.24556	-14.4513	1e-40	2.22e-39	81.6903
SCN3A	-1.08073	2.80663	-12.8398	1.94e-33	2.3e-32	65.0381
SLCO1A2	-1.08104	2.23999	-12.7702	3.92e-33	4.54e-32	64.3426
CNTN3	-1.08404	1.40174	-14.398	1.77e-40	3.84e-39	81.1242
RASGRF1	-1.08505	1.68556	-12.8644	1.51e-33	1.82e-32	65.2847
SUSD5	-1.08528	2.18791	-9.42714	9.59e-20	4.41e-19	33.82
CTTNBP2	-1.08656	3.0813	-16.0831	1.68e-48	7.71e-47	99.4758
STUM	-1.08784	2.75421	-12.8005	2.89e-33	3.37e-32	64.6455
KCNN3	-1.08811	3.54421	-13.0169	3.23e-34	4.08e-33	66.8173
FUT9	-1.08939	2.14691	-17.0234	3.97e-53	2.9e-51	110.061
VEPH1	-1.08994	1.25821	-13.0881	1.57e-34	2.04e-33	67.5354
ARHGDIG	-1.09012	2.71651	-10.9341	1.85e-25	1.23e-24	46.829
FAM171A1	-1.09013	4.65904	-17.996	5.28e-58	6.75e-56	121.22
CD38	-1.09203	2.83632	-12.2272	8.62e-31	8.33e-30	58.9931
LRIG1	-1.09235	6.14843	-15.9642	6.35e-48	2.71e-46	98.1536
KCNQ2	-1.09301	3.67264	-13.2223	3.97e-35	5.46e-34	68.8962
FAM133A	-1.09323	1.46649	-19.4664	1.63e-65	6.15e-63	138.409
NDN	-1.09504	4.61171	-12.5419	3.85e-32	4.1e-31	62.0768
LRATD2	-1.09514	4.04168	-13.1981	5.09e-35	6.92e-34	68.6509
ALDH5A1	-1.09795	4.34268	-19.5551	5.7e-66	2.28e-63	139.455
GGTA1	-1.10113	3.02404	-13.4206	5.17e-36	7.49e-35	70.9209
VAT1L	-1.10509	3.61803	-9.73719	7.15e-21	3.51e-20	36.3849
C14orf132	-1.10701	4.59606	-14.8249	1.79e-42	4.49e-41	85.6888
LHFPL3	-1.1073	4.68488	-8.73246	2.58e-17	1.02e-16	28.2987
ARFGEF3	-1.10883	2.38347	-15.8371	2.62e-47	1.03e-45	96.7442
PACSIN1	-1.10949	2.46493	-7.23549	1.45e-12	4.27e-12	17.5421
TUBB4A	-1.10977	6.01821	-9.68149	1.14e-20	5.56e-20	35.9196
DSCAM	-1.11115	2.85414	-14.6976	7.09e-42	1.72e-40	84.321
ADGRV1	-1.11155	2.20204	-14.2396	9.61e-40	1.94e-38	79.4463
TJP2	-1.11491	4.56556	-13.0098	3.47e-34	4.38e-33	66.7456
UNC79	-1.11756	1.75384	-15.9667	6.18e-48	2.65e-46	98.1807
HIP1R	-1.11908	4.61291	-12.3593	2.35e-31	2.37e-30	60.2814
LIMS2	-1.11917	3.09965	-11.1897	1.75e-26	1.25e-25	49.1649
NKD1	-1.12121	2.42501	-15.3703	4.62e-45	1.47e-43	91.6068
PID1	-1.12334	4.49935	-14.905	7.5e-43	1.96e-41	86.5521
MTURN	-1.12394	6.01094	-12.462	8.51e-32	8.83e-31	61.2898
NAP1L2	-1.12695	3.20652	-12.748	4.89e-33	5.63e-32	64.1215
SNCG	-1.1305	3.34174	-9.09842	1.41e-18	6.01e-18	31.1677
ADGRB1	-1.13106	3.95014	-10.811	5.7e-25	3.66e-24	45.7174
OMG	-1.13112	4.14237	-15.7557	6.5e-47	2.45e-45	95.8436
MEGF11	-1.13114	2.51364	-13.4143	5.51e-36	7.97e-35	70.8563
MYH7	-1.13218	2.23653	-12.8351	2.04e-33	2.4e-32	64.9911
CMTM5	-1.13235	3.91638	-14.1668	2.08e-39	4.07e-38	78.6785
LINGO1	-1.13472	4.52759	-12.6896	8.79e-33	9.89e-32	63.5403
SPON1	-1.13551	4.74515	-10.9273	1.97e-25	1.31e-24	46.7681
SNCB	-1.13584	3.84938	-7.62438	9.9e-14	3.12e-13	20.1791
NTNG2	-1.1401	2.27969	-20.154	4.54e-69	2.96e-66	146.549
BASP1	-1.14052	5.56369	-13.1495	8.36e-35	1.11e-33	68.158
HES5	-1.14138	2.49778	-10.4353	1.67e-23	9.82e-23	42.3759
SLITRK1	-1.14148	2.09019	-14.1359	2.89e-39	5.58e-38	78.3526
NET1	-1.14202	3.73069	-16.3205	1.16e-49	5.93e-48	102.128
TSPOAP1	-1.14216	2.78837	-15.7963	4.13e-47	1.59e-45	96.2926
LHFPL4	-1.14329	3.74498	-15.2009	2.97e-44	8.73e-43	89.758
RHBDL3	-1.14393	3.19149	-14.2896	5.65e-40	1.17e-38	79.9746
FSTL5	-1.14766	1.22687	-15.5841	4.36e-46	1.55e-44	93.9521
GNAL	-1.14862	1.81434	-18.4495	2.65e-60	4.62e-58	126.484
KIF1A	-1.15346	5.40521	-13.7524	1.64e-37	2.69e-36	74.3443
DISP3	-1.1585	2.56705	-16.4903	1.71e-50	9.53e-49	104.033
PHACTR3	-1.16249	3.31368	-13.7937	1.07e-37	1.78e-36	74.7728
ST8SIA3	-1.1628	1.79651	-13.1292	1.03e-34	1.36e-33	67.9521
HRH3	-1.16463	1.53435	-12.9887	4.3e-34	5.39e-33	66.5329
DCX	-1.16489	2.67072	-11.83	4.09e-29	3.52e-28	55.1669
ASIC1	-1.16697	4.39022	-16.2227	3.5e-49	1.71e-47	101.033
MAPT	-1.16748	4.80585	-17.6674	2.4e-56	2.51e-54	117.428
SYN1	-1.16818	4.06364	-9.18705	6.87e-19	2.99e-18	31.8759
SLC8A2	-1.1697	1.97951	-12.3067	3.95e-31	3.91e-30	59.7678
SEMA6B	-1.16979	3.73143	-15.9764	5.54e-48	2.4e-46	98.2885
CUX2	-1.17025	1.31158	-16.0126	3.7e-48	1.63e-46	98.6913
TPPP	-1.17062	4.1601	-10.4194	1.92e-23	1.13e-22	42.2357
CALCRL	-1.1707	3.78041	-13.1355	9.65e-35	1.28e-33	68.0159
SHISAL1	-1.17087	1.74257	-12.4714	7.75e-32	8.05e-31	61.3824
EYA1	-1.17367	2.11481	-14.4262	1.31e-40	2.87e-39	81.4232
SNAP25	-1.1754	5.14013	-7.40742	4.5e-13	1.36e-12	18.6938
CNTNAP2	-1.17561	1.9385	-13.706	2.67e-37	4.28e-36	73.8627
HPCAL4	-1.17679	3.25084	-9.84402	2.88e-21	1.45e-20	37.2825
DNM3	-1.18122	2.68004	-18.3377	9.79e-60	1.58e-57	125.183
NTSR2	-1.18374	3.36819	-8.9119	6.27e-18	2.57e-17	29.6943
MN1	-1.18583	2.19673	-18.463	2.26e-60	4.02e-58	126.642
CELF5	-1.19279	2.48034	-14.266	7.26e-40	1.49e-38	79.725
CDH20	-1.19433	3.90721	-15.5039	1.06e-45	3.6e-44	93.0708
NRXN1	-1.19446	2.8957	-15.9855	5.01e-48	2.17e-46	98.39
TRIM67	-1.19541	1.50373	-9.7276	7.75e-21	3.8e-20	36.3047
VSTM2A	-1.19577	1.84568	-11.554	5.72e-28	4.52e-27	52.5536
EEPD1	-1.19735	3.86203	-16.3764	6.19e-50	3.28e-48	102.754
SNX22	-1.20268	3.3866	-11.6544	2.2e-28	1.8e-27	53.4998
VSTM2B	-1.20401	2.83202	-13.3439	1.14e-35	1.62e-34	70.1361
STX1B	-1.2062	3.47641	-14.1368	2.87e-39	5.53e-38	78.3621
NAP1L3	-1.20653	4.84625	-18.3355	1.01e-59	1.6e-57	125.157
CDK5R1	-1.20894	4.0631	-14.6731	9.24e-42	2.21e-40	84.058
FBLL1	-1.20938	3.12067	-14.4407	1.12e-40	2.48e-39	81.5778
UNC13A	-1.21051	2.7942	-14.0588	6.54e-39	1.22e-37	77.5428
TLCD3B	-1.21265	2.61786	-17.4525	2.87e-55	2.66e-53	114.961
CNTN1	-1.21426	4.97206	-12.4402	1.06e-31	1.09e-30	61.0749
CADM2	-1.2154	4.00687	-15.47	1.54e-45	5.17e-44	92.6986
GPR27	-1.21601	2.58703	-13.5652	1.16e-36	1.76e-35	72.4073
ATP8A1	-1.21888	2.85982	-16.8481	2.94e-52	1.96e-50	108.072
REPS2	-1.21948	1.97561	-18.1264	1.15e-58	1.64e-56	122.73
GABRG2	-1.22398	2.02536	-10.0617	4.43e-22	2.36e-21	39.1335
SEPTIN3	-1.2258	5.46364	-15.836	2.66e-47	1.04e-45	96.7319
CBLN1	-1.22936	1.52588	-17.4048	4.97e-55	4.5e-53	114.415
L1CAM	-1.23381	2.58643	-9.21127	5.64e-19	2.47e-18	32.0704
FAIM2	-1.23546	5.53927	-15.5336	7.62e-46	2.63e-44	93.3971
NDRG2	-1.2406	7.26264	-14.7283	5.09e-42	1.25e-40	84.6504
SVOP	-1.24916	1.70477	-12.1244	2.36e-30	2.21e-29	57.9952
CACNG2	-1.25262	1.33082	-15.1457	5.44e-44	1.56e-42	89.1578
HMX1	-1.2531	1.83482	-15.1999	3e-44	8.8e-43	89.7479
TMEFF2	-1.254	2.40835	-16.4131	4.09e-50	2.21e-48	103.166
RAPGEF4	-1.25699	3.1221	-15.0746	1.18e-43	3.31e-42	88.386
FBXL16	-1.25702	4.54182	-12.1352	2.12e-30	1.99e-29	58.0993
FLRT1	-1.25949	2.59666	-17.6008	5.17e-56	5.14e-54	116.663
RGR	-1.25955	1.65997	-14.8453	1.43e-42	3.64e-41	85.908
TCEAL2	-1.2603	5.44799	-15.1472	5.35e-44	1.53e-42	89.1744
TUB	-1.26423	3.99616	-18.4773	1.91e-60	3.49e-58	126.808
WNT7B	-1.26452	1.91834	-14.326	3.83e-40	8.05e-39	80.3599
CELF3	-1.26619	2.9628	-12.6988	8.02e-33	9.06e-32	63.6314
SMIM18	-1.26755	2.04744	-15.9823	5.19e-48	2.25e-46	98.3538
LINC00672	-1.27361	2.91293	-15.5359	7.44e-46	2.57e-44	93.4217
CA10	-1.27377	2.74597	-10.9029	2.47e-25	1.62e-24	46.5466
NTRK2	-1.27487	5.88436	-12.9618	5.66e-34	7.05e-33	66.2616
SSTR1	-1.27638	1.53989	-14.42	1.4e-40	3.06e-39	81.3571
ARPP21	-1.27937	2.26087	-19.6257	2.46e-66	1.05e-63	140.29
NXPH1	-1.27945	3.42692	-12.9121	9.35e-34	1.14e-32	65.763
GABRG1	-1.28118	1.86638	-12.9957	4.01e-34	5.03e-33	66.6033
BCAN	-1.28481	8.94207	-12.8179	2.42e-33	2.85e-32	64.8188
GABRD	-1.29068	2.94933	-11.0298	7.69e-26	5.24e-25	47.6999
FAM155A	-1.29655	2.02791	-17.9447	9.59e-58	1.19e-55	120.626
ATOH8	-1.29701	3.01692	-14.3947	1.84e-40	3.97e-39	81.0887
OPHN1	-1.29704	3.38934	-18.2708	2.14e-59	3.25e-57	124.405
NRSN1	-1.2981	2.81715	-13.7653	1.43e-37	2.37e-36	74.4776
BRINP1	-1.30208	3.05952	-12.3575	2.39e-31	2.41e-30	60.2643
MYT1	-1.30215	2.62217	-13.784	1.18e-37	1.96e-36	74.6725
SLC25A48	-1.30914	1.93197	-15.3964	3.47e-45	1.12e-43	91.8927
FAM222A	-1.31029	3.69205	-16.2371	2.97e-49	1.47e-47	101.195
RTN1	-1.31164	5.24961	-13.7848	1.17e-37	1.95e-36	74.6808
UNC5A	-1.31575	2.57343	-15.4987	1.12e-45	3.79e-44	93.0138
FAM110B	-1.31805	3.95889	-20.0897	9.78e-69	6.18e-66	145.786
FAM163B	-1.31869	2.67388	-10.0544	4.72e-22	2.52e-21	39.0707
AMER2	-1.32113	3.82494	-15.7842	4.73e-47	1.8e-45	96.1587
PDZD4	-1.32513	5.43509	-17.4739	2.24e-55	2.09e-53	115.206
CPLX1	-1.32659	3.48849	-12.376	1.99e-31	2.02e-30	60.4452
LINC00634	-1.32719	3.74628	-17.921	1.26e-57	1.53e-55	120.353
UGT8	-1.33195	3.94372	-13.0563	2.16e-34	2.77e-33	67.2147
ABCC8	-1.33302	2.06167	-15.2648	1.47e-44	4.44e-43	90.4546
SCD	-1.33507	7.38054	-15.8036	3.81e-47	1.48e-45	96.373
SCN3B	-1.33588	2.62453	-13.0662	1.96e-34	2.52e-33	67.314
EPHB1	-1.33865	3.34463	-15.786	4.64e-47	1.78e-45	96.1779
TMEM151B	-1.34271	2.53908	-13.2459	3.12e-35	4.33e-34	69.1372
ENHO	-1.34895	6.44751	-13.7201	2.3e-37	3.72e-36	74.0087
KCNB1	-1.34902	2.48511	-18.3693	6.76e-60	1.11e-57	125.551
KCNJ11	-1.35015	2.38131	-14.391	1.91e-40	4.12e-39	81.0498
PRSS35	-1.3563	2.1852	-16.2455	2.71e-49	1.35e-47	101.289
ADCYAP1R1	-1.35842	6.28696	-14.5272	4.44e-41	1.01e-39	82.4989
GABRA3	-1.36398	2.51	-14.6452	1.25e-41	2.94e-40	83.759
KCNJ9	-1.36579	3.16037	-14.2841	5.98e-40	1.24e-38	79.9171
PRLHR	-1.36697	1.32643	-13.9313	2.51e-38	4.4e-37	76.2073
SHISA7	-1.36963	2.53782	-17.5357	1.1e-55	1.07e-53	115.915
IFITM10	-1.37081	3.37152	-17.7222	1.27e-56	1.4e-54	118.059
NKAIN4	-1.37362	5.78088	-13.5035	2.19e-36	3.28e-35	71.7723
GABRB3	-1.37619	2.15714	-16.8853	1.92e-52	1.31e-50	108.493
DLGAP1	-1.38004	2.74398	-19.0343	2.72e-63	7.2e-61	133.323
GFRA1	-1.38143	2.04953	-15.1238	6.91e-44	1.95e-42	88.9208
HES6	-1.3906	6.59931	-14.9353	5.4e-43	1.44e-41	86.8791
SSTR2	-1.39089	1.99537	-17.1412	1.03e-53	8.12e-52	111.403
OLIG2	-1.39094	6.19314	-14.827	1.75e-42	4.4e-41	85.7106
PHYHIPL	-1.39109	5.56083	-16.4611	2.38e-50	1.3e-48	103.705
PDE2A	-1.39374	2.89265	-15.8653	1.92e-47	7.69e-46	97.0564
KIF21B	-1.39815	3.19105	-18.7868	5.03e-62	1.06e-59	130.423
SPTBN2	-1.40221	3.26348	-17.7255	1.22e-56	1.36e-54	118.098
NMNAT2	-1.40267	3.01047	-14.9128	6.89e-43	1.82e-41	86.6359
ZNF488	-1.40854	3.18011	-12.8367	2e-33	2.37e-32	65.0067
ATP6V1G2	-1.41695	5.13803	-16.1629	6.86e-49	3.25e-47	100.365
NEU4	-1.42694	3.28006	-14.5972	2.09e-41	4.86e-40	83.2457
CALN1	-1.42891	1.91265	-14.3429	3.2e-40	6.78e-39	80.5397
ASIC4	-1.43473	3.56499	-11.9822	9.41e-30	8.37e-29	56.6241
OLIG1	-1.43561	7.45336	-14.8646	1.16e-42	2.98e-41	86.1157
TNK2	-1.44539	4.5009	-19.6561	1.72e-66	7.73e-64	140.648
GRIA4	-1.4484	3.76056	-17.0739	2.22e-53	1.67e-51	110.637
ACTL6B	-1.45254	2.76713	-13.1847	5.84e-35	7.9e-34	68.515
PCDH15	-1.45328	1.83212	-18.5559	7.59e-61	1.44e-58	127.725
BTBD17	-1.45783	3.78843	-14.8562	1.27e-42	3.25e-41	86.0253
RUNDC3A	-1.46099	4.20106	-16.5671	7.16e-51	4.23e-49	104.897
ATP1A3	-1.47465	5.16647	-12.8616	1.56e-33	1.87e-32	65.2564
PTPRT	-1.47798	1.88298	-19.089	1.43e-63	4.1e-61	133.966
SLIT1	-1.47929	4.14102	-14.2581	7.9e-40	1.61e-38	79.6418
ALDOC	-1.49642	7.82943	-15.2426	1.88e-44	5.61e-43	90.2126
GRIA2	-1.49714	4.03663	-18.0059	4.7e-58	6.06e-56	121.334
PSD	-1.49883	3.47839	-15.4602	1.72e-45	5.72e-44	92.5916
VIPR2	-1.5054	2.41437	-13.1824	5.98e-35	8.08e-34	68.4911
MACROH2A2	-1.51523	3.6142	-17.923	1.23e-57	1.5e-55	120.376
PLPPR1	-1.52177	3.98916	-14.0315	8.73e-39	1.62e-37	77.2557
DUSP26	-1.52339	4.0787	-17.5176	1.35e-55	1.3e-53	115.707
MMD2	-1.52909	3.14551	-14.8164	1.96e-42	4.91e-41	85.5968
RCOR2	-1.53419	3.83348	-17.1092	1.48e-53	1.14e-51	111.038
GABBR2	-1.53678	3.67692	-13.8814	4.24e-38	7.32e-37	75.6863
GDAP1L1	-1.54257	3.48015	-17.0525	2.84e-53	2.11e-51	110.392
SCRT1	-1.56028	2.18968	-15.3085	9.12e-45	2.81e-43	90.9313
GRIN1	-1.56273	2.51855	-11.5246	7.56e-28	5.92e-27	52.2782
DAAM2	-1.56837	4.84699	-13.2961	1.86e-35	2.62e-34	69.6479
DLL1	-1.5684	4.15501	-17.0174	4.25e-53	3.07e-51	109.993
HPSE2	-1.57313	1.80864	-14.843	1.47e-42	3.73e-41	85.8831
KCNIP3	-1.59907	2.93814	-20.6986	6.68e-72	5.94e-69	153.032
JPH4	-1.60465	3.97938	-17.5734	7.1e-56	7.02e-54	116.348
SEZ6L	-1.61078	4.79056	-13.7314	2.04e-37	3.31e-36	74.1265
DSCAML1	-1.61504	2.73171	-19.6021	3.26e-66	1.36e-63	140.011
NOG	-1.61773	2.49525	-18.9346	8.82e-63	2.13e-60	132.154
CDHR1	-1.62154	2.41684	-21.1226	4.09e-74	5.01e-71	158.098
SCG3	-1.64315	6.6681	-15.334	6.89e-45	2.14e-43	91.2103
KCNIP2	-1.65734	3.20491	-15.0396	1.73e-43	4.78e-42	88.007
GABBR1	-1.65839	5.34235	-19.2412	2.36e-64	7.44e-62	135.755
CHGA	-1.66641	3.23674	-11.9243	1.65e-29	1.44e-28	56.0678
SELL	-1.6729	3.5451	-11.6771	1.77e-28	1.45e-27	53.7145
LUZP2	-1.68066	3.17321	-16.229	3.26e-49	1.61e-47	101.103
TMEM100	-1.69238	4.26328	-15.4445	2.04e-45	6.76e-44	92.4195
CPLX2	-1.69301	3.53254	-11.289	6.94e-27	5.09e-26	50.0822
SPHKAP	-1.69487	1.70653	-20.8098	1.76e-72	1.64e-69	154.36
RPRM	-1.72452	3.40582	-17.0606	2.59e-53	1.94e-51	110.484
SNAP91	-1.74783	3.11726	-17.7245	1.24e-56	1.37e-54	118.086
ATCAY	-1.74956	4.58909	-14.5232	4.64e-41	1.05e-39	82.4566
GPR17	-1.76966	4.09289	-11.972	1.04e-29	9.2e-29	56.5259
USH1C	-1.78402	2.35361	-15.813	3.43e-47	1.34e-45	96.4775
ELFN2	-1.79219	2.77791	-19.2672	1.73e-64	5.56e-62	136.062
BMP2	-1.79793	3.45046	-18.9694	5.85e-63	1.47e-60	132.562
KLRC2	-1.82556	2.51286	-15.581	4.51e-46	1.61e-44	93.9178
JPH3	-1.83647	2.8113	-19.2795	1.5e-64	4.88e-62	136.206
CHGB	-1.86411	3.77437	-15.1272	6.66e-44	1.89e-42	88.9569
CSDC2	-1.8892	3.80398	-16.6113	4.34e-51	2.61e-49	105.395
SH3GL2	-1.89855	4.27969	-17.3262	1.23e-54	1.06e-52	113.514
FERMT1	-1.90092	3.17792	-18.2778	1.97e-59	3.02e-57	124.487
ZDHHC22	-1.9129	4.40345	-19.08	1.59e-63	4.43e-61	133.86
CRTAC1	-1.94124	3.41231	-17.5544	8.84e-56	8.7e-54	116.13
RASL10A	-1.94753	3.00644	-22.5897	8.21e-82	2.3e-78	175.719
ETNPPL	-1.97776	4.32836	-13.2816	2.16e-35	3.03e-34	69.5002
SOX8	-1.99819	6.58739	-18.2808	1.9e-59	2.96e-57	124.522
GALNT13	-2.02033	3.71922	-18.8211	3.36e-62	7.31e-60	130.824
RTP5	-2.04373	2.72535	-19.2014	3.78e-64	1.14e-61	135.287
INA	-2.07377	3.55516	-15.3416	6.34e-45	1.98e-43	91.293
TNR	-2.11576	4.8765	-16.5206	1.21e-50	6.88e-49	104.374
SHD	-2.17636	4.50789	-18.8694	1.9e-62	4.33e-60	131.39
NSG2	-2.21136	4.57638	-16.038	2.78e-48	1.23e-46	98.9741
DLL3	-2.27713	5.43692	-17.3872	6.09e-55	5.44e-53	114.212
SMOC1	-2.74069	5.97037	-18.6361	2.96e-61	5.92e-59	128.66
SFRP2	-2.75683	3.83259	-16.7198	1.27e-51	8.04e-50	106.62
