# Supplementary material for: Development and validation of a two glycolysis-related LncRNAs prognostic signature for glioma and in vitro analyses
Source: Cell Div. 2023 Jun 24;18:10. doi: 10.1186/s13008-023-00092-9 (PMC10290322; doi:10.1186/s13008-023-00092-9)
Supplement: Supplementary file 9 — Additional file 9. GO results of risk score-related differentially expressed genes. [file 13008_2023_92_MOESM9_ESM.xlsx]

## Sheet: GO
ID	Description	setSize	enrichmentScore	NES	pvalue	p.adjust	qvalues	rank	leading_edge	core_enrichment
GO ADAPTIVE IMMUNE RESPONSE	ADAPTIVE IMMUNE RESPONSE	404	0.564745	2.12079	1e-10	9.10933e-09	6.55018e-09	3128	tags=34%, list=16%, signal=29%	301/710/3122/3598/715/3123/3115/3113/972/716/3426/3117/3127/3119/51279/2207/2302/3108/23529/718/3111/3118/3109/713/6556/3383/712/714/602/1520/567/1075/182/7037/81622/10945/23075/80380/8764/10875/10312/3659/11221/54440/3120/5819/3077/23180/6890/3903/3606/2217/1880/10673/84868/717/1514/84695/3665/962/5551/4067/91543/29108/7040/2213/958/7462/1191/5971/64332/9156/3554/5873/3134/202309/2013/100507436/…
GO ADAPTIVE IMMUNE RESPONSE BASED ON SOMATIC RECOMBINATION OF IMMUNE RECEPTORS BUILT FROM IMMUNOGLOBULIN SUPERFAMILY DOMAINS	ADAPTIVE IMMUNE RESPONSE BASED ON SOMATIC RECOMBINATION OF IMMUNE RECEPTORS BUILT FROM IMMUNOGLOBULIN SUPERFAMILY DOMAINS	248	0.604279	2.19512	1e-10	9.10933e-09	6.55018e-09	3175	tags=39%, list=17%, signal=33%	301/710/3598/715/972/716/3426/3119/51279/2207/2302/23529/718/713/6556/3383/712/714/602/567/1075/182/7037/10945/23075/10875/10312/54440/5819/3077/23180/3606/2217/10673/84868/717/84695/3665/5551/91543/7040/2213/958/1191/5971/64332/9156/3554/5873/3134/202309/2013/100507436/3133/7128/29126/5788/920/11118/51176/10538/4277/5777/7133/10459/7855/3569/730/51043/5817/3566/8915/8772/7374/6774/54795/3718/640…
GO AZUROPHIL GRANULE	AZUROPHIL GRANULE	152	0.633625	2.1958	1e-10	9.10933e-09	6.55018e-09	3185	tags=47%, list=17%, signal=39%	2171/302/4069/6036/684/718/967/2519/2512/2357/8673/10577/12/3074/1075/8836/2990/11010/2799/1650/2717/2517/51816/9588/79980/2720/5476/29108/2896/54918/5908/84061/719/23593/25798/10487/9545/10383/6809/175/5547/4257/6037/25801/374395/150372/4125/8635/6836/55313/6386/10493/10970/51316/23385/203068/410/4332/2683/29952/3614/8804/2588/79888/968/58485/3073/3920/5580/6813/8773
GO B CELL MEDIATED IMMUNITY	B CELL MEDIATED IMMUNITY	119	0.670779	2.27244	1e-10	9.10933e-09	6.55018e-09	3356	tags=43%, list=18%, signal=36%	710/3598/715/972/716/3426/3119/51279/2207/2302/23529/718/713/712/714/602/7037/23075/10875/10312/5819/717/3665/7040/2213/958/1191/9156/202309/3133/5788/10538/5777/10459/730/3566/8915/7374/7784/695/6778/970/721/2067/51311/3635/5580/3586/8741/9466/720
GO CATION CHANNEL ACTIVITY	CATION CHANNEL ACTIVITY	333	-0.520614	-2.1019	1e-10	9.10933e-09	6.55018e-09	2477	tags=30%, list=13%, signal=27%	2906/775/40/3776/27012/7222/3786/6262/783/8416/782/2903/54207/23413/3748/7220/3756/785/27112/57582/2904/11141/343450/10089/23416/348980/8911/8912/25769/123041/59284/3775/8514/7881/6339/57657/59283/55799/774/777/6261/9311/6334/3746/56660/2905/6326/2823/3747/3761/3760/9254/9127/56479/131096/57156/781/10368/610/6323/2900/5027/3780/773/57419/2892/3781/6327/3766/285175/1141/1137/27092/116443/2890/2592…
GO CATION CHANNEL COMPLEX	CATION CHANNEL COMPLEX	219	-0.587895	-2.2879	1e-10	9.10933e-09	6.55018e-09	2806	tags=42%, list=15%, signal=36%	808/3736/9722/3737/91404/776/2906/775/3306/3776/729993/27012/7222/3786/6262/783/402117/375567/782/2903/118427/3748/7220/3756/785/22871/2904/6804/348980/388336/8911/10142/8912/1804/59284/3775/8514/7881/1741/59283/55799/10367/774/1742/777/6261/6334/3746/57406/2905/6844/6326/3747/3761/3760/9254/56479/781/10368/610/6323/2900/3780/773/1740/50944/2892/6327/285175/27092/9472/116443/2890/57628/3751/2898/…
GO CELL CHEMOTAXIS	CELL CHEMOTAXIS	296	0.529742	1.94398	1e-10	9.10933e-09	6.55018e-09	4051	tags=42%, list=21%, signal=34%	301/5054/5919/3958/6288/3627/6280/7422/3315/972/7042/4192/3576/4015/9547/6279/6347/7114/2207/10451/7057/7852/728/3269/6352/5880/80310/23075/3689/56833/3148/1969/7060/6373/5764/1843/1880/80270/4283/8829/4233/84818/811/6289/4067/196527/63940/51192/1230/719/1902/2260/3965/1234/5872/3672/199/51176/683/58191/25865/5159/3082/1839/2150/6364/3569/4282/4856/5155/1441/2919/391/80024/54795/30817/6362/3557/7…
GO CELL SUBSTRATE JUNCTION	CELL SUBSTRATE JUNCTION	414	0.515396	1.93855	1e-10	9.10933e-09	6.55018e-09	3185	tags=39%, list=17%, signal=33%	301/7431/4478/9124/81848/5328/2318/4323/3315/960/857/3371/87/9902/3678/308/7205/976/977/5329/7791/4162/6385/8826/2316/3383/3675/54751/7171/1266/3339/858/1535/3691/5880/567/1948/726/2275/4267/2022/3689/7041/10095/10544/6237/1969/5478/129804/9260/3688/51056/9493/5819/7408/8321/998/5216/8829/25996/2535/3673/23022/5034/10092/3936/8754/811/3309/9590/1466/1803/2923/1465/928/390/81/2242/3304/60/1265/261…
GO CHEMICAL SYNAPTIC TRANSMISSION POSTSYNAPTIC	CHEMICAL SYNAPTIC TRANSMISSION POSTSYNAPTIC	108	-0.655234	-2.36911	1e-10	9.10933e-09	6.55018e-09	2302	tags=41%, list=12%, signal=36%	2932/5649/2903/54413/4355/22871/2904/6804/5530/5999/2743/22999/6622/22997/85358/1742/2905/9162/9127/81832/55607/5590/8001/388135/5027/18/57555/50944/2895/9699/22941/124925/1141/1137/56853/57030/2898/23542/23316/9378/112755/869/2562/2902
GO COGNITION	COGNITION	297	-0.509959	-2.04547	1e-10	9.10933e-09	6.55018e-09	2458	tags=39%, list=13%, signal=34%	25946/3776/2915/1393/23259/2055/84446/5649/5153/2534/10716/25836/84197/4761/5071/2903/54413/54207/7432/4212/151556/114781/5048/8867/53358/6900/8997/590/3815/11170/9369/2740/2033/2904/1979/84630/84687/25769/8831/55084/100132074/2258/114/7991/2648/7881/85358/152789/3156/1742/2558/84896/4763/7349/814/10522/348/2334/477/8398/6326/338811/9162/5532/3356/65009/23373/81832/885/5590/9993/4900/4248/57468/5…
GO COLLAGEN CONTAINING EXTRACELLULAR MATRIX	COLLAGEN CONTAINING EXTRACELLULAR MATRIX	407	0.627756	2.35866	1e-10	9.10933e-09	6.55018e-09	1624	tags=34%, list=8%, signal=32%	7076/301/5054/5919/2331/1282/10631/302/1281/165/6275/1292/1284/1277/3958/710/4256/4318/1278/3956/27286/6280/871/30008/1290/633/6277/9518/90187/5118/7042/6281/4192/2152/6649/3371/2335/5265/255743/7045/4060/6279/3915/115908/308/1289/3490/3912/5359/2162/1295/977/11117/10516/4017/4016/4239/3491/84034/713/2202/7057/5104/2192/3383/712/1842/64856/5176/4313/283/714/3339/3908/12/1299/1634/1520/1075/1992/2…
GO DEFENSE RESPONSE TO BACTERIUM	DEFENSE RESPONSE TO BACTERIUM	256	0.569747	2.07732	1e-10	9.10933e-09	6.55018e-09	3323	tags=27%, list=17%, signal=22%	4057/5054/5919/6280/5320/4069/6279/7132/2207/85236/9636/6556/2634/4615/57817/54209/728/1535/79792/602/6464/10417/6039/1051/56833/8764/3148/1969/7097/3240/6590/84868/7425/140823/29108/3140/2896/4843/8970/54/100507436/3133/3512/920/23166/10578/6037/2150/6364/2268/3569/115361/6170/284297/51316/6850/8349/6223/7098/26253/8347/6283/944/5580/3586/5473/10392/9466
GO DEFENSE RESPONSE TO VIRUS	DEFENSE RESPONSE TO VIRUS	242	0.587362	2.12438	1e-10	9.10933e-09	6.55018e-09	3875	tags=41%, list=20%, signal=33%	3627/2633/10410/6036/27350/2537/5359/684/9636/2316/4938/4599/10581/4939/81622/10417/6039/2635/83666/4940/10875/60489/51191/3659/10346/6772/64782/4283/3665/5551/8638/151636/91543/85363/29108/8692/63901/958/9582/8519/3428/3669/55337/3588/64135/200316/100507436/7128/5788/3559/3661/4343/330/3429/4277/340061/64108/79594/2150/79132/115004/3569/10269/4600/7105/84166/8772/81844/6502/10475/10859/80149/140…
GO DENDRITE DEVELOPMENT	DENDRITE DEVELOPMENT	243	-0.512178	-2.00749	1e-10	9.10933e-09	6.55018e-09	2977	tags=42%, list=16%, signal=36%	473/29882/9201/1627/1952/5728/4976/79791/10084/1399/1496/80243/57492/23098/50488/9344/2932/5649/2534/6792/23426/10152/1630/115703/23543/54413/26039/23105/7074/57520/153090/5048/22871/22891/8997/11141/6453/57498/22906/10507/23043/1501/7804/3397/25791/5530/84687/8831/100132074/5802/9693/55079/85358/23271/26012/10479/23072/9148/55619/1742/10611/9762/348/4168/10006/80725/9912/85442/23373/55607/26050/…
GO DISTAL AXON	DISTAL AXON	291	-0.561635	-2.25569	1e-10	9.10933e-09	6.55018e-09	2806	tags=41%, list=15%, signal=35%	808/3736/3737/27124/867/2805/23208/793/4649/3776/1393/22933/9344/84446/23405/80315/9513/6792/65018/1809/7074/22853/23413/5048/57698/8867/323/118813/50861/440279/28964/57465/6453/64780/22906/51199/25791/140679/84687/26059/3799/9066/4628/5799/9479/7248/246213/2258/56288/6622/8514/57282/1741/57657/90060/5881/10479/7349/347730/3746/322/10006/79784/116983/2823/3747/9162/23162/22902/5798/10439/885/4644…
GO ENDOPLASMIC RETICULUM LUMEN	ENDOPLASMIC RETICULUM LUMEN	306	0.589802	2.17465	1e-10	9.10933e-09	6.55018e-09	2991	tags=41%, list=16%, signal=35%	7076/1282/1281/1292/1284/1277/3486/6696/1278/3956/871/1290/3488/11167/3371/2335/5265/493869/3915/1289/3490/5154/3912/56975/1356/60681/1295/5329/718/813/3491/2519/2882/7057/3487/9601/414/64856/143888/1299/79642/567/1075/1471/1522/8542/11098/80310/9403/55214/54587/1291/1293/4052/8985/79709/55741/1296/3913/25870/50509/4924/10954/56005/6383/5034/416/811/64175/7425/51246/7873/3309/10130/57333/2923/169…
GO EXOCYTIC VESICLE	EXOCYTIC VESICLE	219	-0.548257	-2.13365	1e-10	9.10933e-09	6.55018e-09	2905	tags=38%, list=15%, signal=33%	143187/57799/57084/23335/51760/808/1183/1182/23208/114088/9900/84446/81615/5869/80331/7781/1809/2903/79641/85439/1759/8448/440279/134957/6804/23312/94121/321/274/140679/2572/22895/6861/84258/6843/9066/10966/5799/23176/246213/273/5802/143425/320/6622/5413/8224/9143/5414/1742/9627/132204/6844/148281/9162/9899/5874/5798/112476/9145/388662/57586/6854/5864/7732/203190/192683/6857/8927/2890/115827/6855…
GO EXTRACELLULAR LIGAND GATED ION CHANNEL ACTIVITY	EXTRACELLULAR LIGAND GATED ION CHANNEL ACTIVITY	74	-0.715285	-2.43027	1e-10	9.10933e-09	6.55018e-09	1613	tags=38%, list=8%, signal=35%	2904/2560/2743/2558/2561/2905/9127/2900/8001/5027/2554/2895/2892/1141/1137/2894/116443/2890/57030/2898/2566/2565/2563/2556/2562/2893/2891/2902
GO EXTRACELLULAR MATRIX STRUCTURAL CONSTITUENT	EXTRACELLULAR MATRIX STRUCTURAL CONSTITUENT	165	0.735182	2.55916	1e-10	9.10933e-09	6.55018e-09	1624	tags=40%, list=8%, signal=37%	1116/2331/1282/10631/1281/165/1292/1284/1277/4256/1278/27286/30008/1290/633/90187/5118/3371/2335/255743/7045/4060/3915/115908/1289/3490/3912/1295/11117/10516/4239/3491/84034/2202/7057/2192/64856/3339/3908/1299/1634/2006/7450/25878/1291/10875/1293/4052/1296/3913/4237/3910/50509/4811/169044/4147/80781/1893/54829/22795/1306/920/4053/7373/8406/1303
GO EXTRACELLULAR STRUCTURE ORGANIZATION	EXTRACELLULAR STRUCTURE ORGANIZATION	369	0.593577	2.21176	1e-10	9.10933e-09	6.55018e-09	2100	tags=35%, list=11%, signal=32%	7076/10630/5054/2331/1282/10631/302/1281/165/1292/1284/1277/6696/4318/1278/5806/871/30008/1290/633/4323/960/7042/857/3371/2335/4015/255743/7045/3381/4060/3915/3678/1289/7132/5154/3912/4982/1295/11117/10516/4017/4016/4239/3491/3679/8038/7057/2192/3383/3675/1842/64856/4313/3339/858/1513/3908/5352/1299/3691/1634/602/1520/1471/2006/10549/7450/5351/2022/3689/7101/169611/1291/50848/3688/1293/8985/79709…
GO GATED CHANNEL ACTIVITY	GATED CHANNEL ACTIVITY	341	-0.537964	-2.18158	1e-10	9.10933e-09	6.55018e-09	2477	tags=33%, list=13%, signal=29%	2906/2557/775/40/3776/27012/3786/57348/6262/121601/783/203859/8416/782/2903/54207/23413/3748/3756/785/27112/57582/2904/11141/343450/10089/23416/348980/1185/2560/8911/8912/57719/2743/59284/3775/8514/7881/6339/57657/59283/55799/774/777/2558/6261/9311/6334/3746/56660/2561/2905/6326/3747/3761/3760/9254/9127/56479/94015/131096/57156/781/10368/610/6323/2900/8001/5027/3780/2554/773/2895/2892/3781/6327/3…
GO GLUTAMATERGIC SYNAPSE	GLUTAMATERGIC SYNAPSE	355	-0.604571	-2.46207	1e-10	9.10933e-09	6.55018e-09	2195	tags=44%, list=11%, signal=40%	6792/23426/7781/58504/54477/148/84961/27253/6714/22866/2903/54413/9758/7074/1949/23413/26115/1488/1759/4916/29/5332/22871/2911/140735/5217/11141/6804/6453/388336/56850/23043/10142/4884/5530/3208/6843/26059/163/9066/8831/4628/57460/5802/114/320/59284/1741/8224/84631/1742/84896/814/347730/2982/8499/145581/348/2913/57406/8541/2905/147381/148281/64854/6326/5813/2823/23284/492/9912/9162/401190/8618/55…
GO GLUTAMATE RECEPTOR SIGNALING PATHWAY	GLUTAMATE RECEPTOR SIGNALING PATHWAY	100	-0.680811	-2.44002	1e-10	9.10933e-09	6.55018e-09	2863	tags=60%, list=15%, signal=51%	88/2912/54800/57554/2906/2915/729993/1393/50488/747/5649/2534/80315/65018/2903/54413/7074/22871/2911/6376/2904/388336/59284/85358/1741/59283/1742/2913/2905/1612/81832/10368/2900/57555/1740/4747/50944/2895/2892/8787/22941/23236/27092/2894/116443/23732/2890/54550/2898/23542/5923/8851/23025/10369/6751/3745/729956/2893/2891/2902
GO GROWTH FACTOR BINDING	GROWTH FACTOR BINDING	137	0.64347	2.20227	1e-10	9.10933e-09	6.55018e-09	2759	tags=49%, list=14%, signal=42%	3485/1282/1281/1277/3486/1278/27286/3488/114990/9180/53834/1289/3490/5154/4804/22918/3491/11082/6284/7057/3487/8840/3691/6464/3489/2022/94031/57045/1291/2615/5764/4052/1843/64285/1490/3597/8829/135228/83888/8692/2/2817/1956/3554/3561/2260/4053/3559/7048/5159/94/2064/7043/3587/4856/5155/3690/10952/6187/3557/79651/3685/2261/6223/7046/7850/9001
GO HUMORAL IMMUNE RESPONSE	HUMORAL IMMUNE RESPONSE	250	0.614912	2.23352	1e-10	9.10933e-09	6.55018e-09	3694	tags=32%, list=19%, signal=26%	4057/5919/710/3627/715/6280/5320/4069/716/3576/3426/5266/6279/6347/3119/51279/85236/2302/718/713/6556/712/11326/54209/728/714/5627/602/3075/54210/10417/6039/6373/6590/1675/2597/1880/4283/717/140823/2213/3151/1191/9156/2/8970/719/3133/3512/5788/2821/683/10578/6037/5777/3569/730/2919/6170/5245/7784/8349/6223/51441/721/51248/8347/6283/9308/629/5473/78989/3574/720/6372/5699/966/8547/3553/1604/708
GO INTRINSIC COMPONENT OF POSTSYNAPTIC MEMBRANE	INTRINSIC COMPONENT OF POSTSYNAPTIC MEMBRANE	122	-0.65046	-2.38134	1e-10	9.10933e-09	6.55018e-09	2820	tags=53%, list=15%, signal=46%	2912/3736/3361/1007/57497/25945/2557/729993/747/148/1630/27253/2903/54413/1949/4916/22871/6900/388336/5802/59284/84631/2558/347730/3746/145581/2913/57406/2561/401190/9127/3356/80863/81832/26045/57689/10368/2066/2900/2554/57555/22986/2895/10675/64084/1008/6547/347731/1141/27092/2894/64101/2890/1128/53616/6529/3751/53826/114798/1272/10369/2563/2556/729956/2902
GO INTRINSIC COMPONENT OF SYNAPTIC MEMBRANE	INTRINSIC COMPONENT OF SYNAPTIC MEMBRANE	166	-0.627684	-2.37708	1e-10	9.10933e-09	6.55018e-09	2820	tags=51%, list=15%, signal=44%	2912/3736/3737/3361/23208/1007/57497/25945/776/2557/729993/747/27255/148/1630/27253/2903/54413/1949/4916/22871/6900/6804/388336/9066/5802/114/59284/84631/2558/347730/3746/145581/2913/57406/2561/148281/6326/2823/3760/57863/401190/9127/3356/80863/81832/26045/57689/6511/10368/2066/2900/112476/2554/57555/22986/2895/10675/64084/1008/6547/6506/347731/1141/5818/1137/27092/2894/64101/2890/1128/53616/6529…
GO LEUKOCYTE CELL CELL ADHESION	LEUKOCYTE CELL CELL ADHESION	330	0.521018	1.9293	1e-10	9.10933e-09	6.55018e-09	2593	tags=30%, list=14%, signal=26%	3485/301/3958/3956/4478/6280/5320/10457/3115/3113/972/960/4192/857/6279/6347/3678/2302/3109/6385/3383/80381/11326/6352/5880/1948/8651/7037/3689/57045/80380/1051/8764/10875/50848/2615/3688/3659/11221/54440/861/11314/5175/3077/3606/10673/84868/836/84695/445/998/83706/4067/29108/3037/2213/1803/1947/64332/3133/3280/3965/10385/942/29126/199/5788/920/3481/4860/3559/7048/2737/79626/864/5777/2064/3676/35…
GO LEUKOCYTE MIGRATION	LEUKOCYTE MIGRATION	437	0.540255	2.03451	1e-10	9.10933e-09	6.55018e-09	4051	tags=43%, list=21%, signal=35%	301/5054/5919/1277/3958/6288/1278/3627/4478/6280/7422/4323/972/960/7042/4192/857/2335/3576/965/9547/6279/6347/3678/3162/2207/285/2302/11117/10451/6385/7057/6382/3383/7852/3675/54209/728/9123/5627/3269/6352/5880/6464/4267/54210/80310/23075/3689/56833/8764/5478/50848/7060/6373/83483/3688/5764/11314/1843/5175/9056/1880/80270/3204/134/4283/998/7056/6383/3673/84818/962/811/4067/196527/2995/29108/63940…
GO LEUKOCYTE PROLIFERATION	LEUKOCYTE PROLIFERATION	297	0.553295	2.03218	1e-10	9.10933e-09	6.55018e-09	2702	tags=33%, list=14%, signal=29%	3485/301/3958/4478/5320/10457/3115/3113/972/2302/684/977/23529/3109/10451/6385/6556/7305/80381/11326/54209/6352/5880/1026/7037/196/57045/80380/1051/8764/10312/2615/3659/54440/11314/3606/1880/10673/84868/836/4067/29108/2213/2000/1947/958/1191/581/1636/202309/3133/3280/3965/7128/10385/942/29126/199/5788/920/3481/51083/51176/4860/3559/683/7048/8660/5777/2150/7940/7133/2064/3569/916/51043/4282/2281/5…
GO LIGAND GATED ION CHANNEL ACTIVITY	LIGAND GATED ION CHANNEL ACTIVITY	137	-0.623164	-2.33713	1e-10	9.10933e-09	6.55018e-09	1613	tags=31%, list=8%, signal=28%	2904/348980/2560/2743/3775/6339/2558/6261/9311/2561/2905/3761/3760/9127/610/2900/8001/5027/2554/2895/2892/3766/1141/1137/2894/116443/2890/57030/2898/41/2566/2565/2563/3767/2556/3765/2562/2893/2891/2902/84502/57338
GO LYMPHOCYTE MEDIATED IMMUNITY	LYMPHOCYTE MEDIATED IMMUNITY	248	0.581263	2.11151	1e-10	9.10933e-09	6.55018e-09	3356	tags=38%, list=18%, signal=32%	710/3598/715/972/716/3426/3119/51279/2207/2302/23529/718/713/6556/3383/712/714/602/567/1075/182/7037/10945/23075/10875/10312/54440/5819/3077/23180/3606/2217/84868/717/3665/5551/91543/7040/2213/958/1191/9156/80328/3554/5873/3134/202309/2013/100507436/3133/5052/3965/5788/11118/10538/10383/79465/4277/5777/7133/10459/7855/3569/730/5817/3566/8915/8772/7374/54795/64005/10859/203068/7784/695/6778/563/11…
GO METAL ION TRANSMEMBRANE TRANSPORTER ACTIVITY	METAL ION TRANSMEMBRANE TRANSPORTER ACTIVITY	439	-0.492681	-2.04668	1e-10	9.10933e-09	6.55018e-09	2543	tags=29%, list=13%, signal=26%	776/6560/201266/2906/775/40/3776/27012/23390/7222/3786/55117/486/57348/6262/7781/783/6550/8416/782/2903/54207/23413/3748/7220/3756/785/115584/123606/81894/27112/54805/57582/2904/11141/343450/10089/23416/348980/84679/6534/8911/8912/25769/9990/123041/9962/7991/59284/3775/8514/7881/6339/57282/57657/59283/55799/10479/774/8671/777/6261/9311/6334/3746/477/56660/2905/6326/2823/3747/3761/3760/492/9254/56…
GO NEGATIVE REGULATION OF IMMUNE SYSTEM PROCESS	NEGATIVE REGULATION OF IMMUNE SYSTEM PROCESS	458	0.497225	1.88065	1e-10	9.10933e-09	6.55018e-09	2684	tags=29%, list=14%, signal=26%	301/4057/1281/3958/710/3598/5320/10457/2633/972/7042/4192/3202/6347/28959/3162/2207/2302/684/11117/3111/23643/55365/6385/7057/7305/929/11326/714/7538/8651/57045/80380/9111/1051/56833/8764/10875/1268/2615/3659/11221/861/11314/1843/3077/84868/836/3204/2876/134/84695/4067/7040/2213/284/2896/338382/2/3428/8530/3134/100507436/3133/3280/3965/7128/10385/942/29126/8365/146722/5788/1021/8294/10272/51083/4…
GO NEGATIVE REGULATION OF MULTI ORGANISM PROCESS	NEGATIVE REGULATION OF MULTI ORGANISM PROCESS	217	0.602619	2.16125	1e-10	9.10933e-09	6.55018e-09	2840	tags=36%, list=15%, signal=31%	7076/4057/302/710/5806/10410/27350/5359/684/114769/9636/4938/4599/11326/10581/7538/6352/397/10549/4939/9111/56833/4940/10875/6737/60489/3725/11221/6772/6590/64782/84868/811/8638/91543/85363/3065/63901/2896/2/9582/8519/3428/3669/55337/3134/200316/100507436/3133/3965/7128/3559/4838/4277/79594/5978/79132/84875/11027/54625/9830/7105/84166/10221/10475/10859/80149/140564/7784/8724/3685/117854/2697/6223…
GO NEGATIVE REGULATION OF PEPTIDASE ACTIVITY	NEGATIVE REGULATION OF PEPTIDASE ACTIVITY	247	0.557571	2.02539	1e-10	9.10933e-09	6.55018e-09	1735	tags=22%, list=9%, signal=21%	7076/4057/5054/710/4318/358/871/7422/960/9232/5265/5266/332/2537/646424/684/4804/5329/718/114769/7057/5104/5176/4504/12/5627/1800/56925/1471/1992/83596/286204/1475/5918/1293/6590/5271/2597/2876/6195/135228/5269/7035/831/1893/2/3428/10542/8530/4193/51499/51176/330/3082/10406
GO NEURON PROJECTION TERMINUS	NEURON PROJECTION TERMINUS	140	-0.606317	-2.26966	1e-10	9.10933e-09	6.55018e-09	1888	tags=33%, list=10%, signal=30%	23413/8867/440279/28964/57465/6453/64780/140679/9066/5799/246213/6622/8514/57282/57657/10479/1742/7349/3746/6844/3747/9162/5798/885/112476/5582/2571/5864/6857/8927/1128/5579/6855/6860/2898/29993/9256/23025/23769/4915/4983/10815/2902/30818/10814/85300
GO NEURON TO NEURON SYNAPSE	NEURON TO NEURON SYNAPSE	361	-0.609966	-2.48613	1e-10	9.10933e-09	6.55018e-09	2906	tags=51%, list=15%, signal=44%	9201/27445/64506/88/1627/2035/57554/3188/23208/793/55738/5575/57497/6230/9465/25945/118/1496/2906/775/2915/9495/729993/50488/6711/2039/2534/9228/80315/400745/9513/6792/23362/7781/29102/54477/1630/7249/6714/22866/2903/54413/4355/9758/7074/1949/23413/57120/26115/3756/2785/1759/29/5332/22871/2911/659/140735/10243/2904/6804/388336/201191/23043/1501/10142/7804/84687/9066/8831/5064/23136/7248/5802/1434…
GO NEUROTRANSMITTER RECEPTOR ACTIVITY	NEUROTRANSMITTER RECEPTOR ACTIVITY	114	-0.64762	-2.35329	1e-10	9.10933e-09	6.55018e-09	2523	tags=35%, list=13%, signal=31%	3358/2906/2557/2915/51222/8416/2903/2911/2904/2560/2743/3350/2558/2561/2905/3356/1132/2900/8001/2554/2895/2892/1141/1137/2894/116443/2890/1128/2898/11255/2566/2565/2563/2556/2562/2893/2891/9568/2902/2550
GO NEUROTRANSMITTER SECRETION	NEUROTRANSMITTER SECRETION	168	-0.665982	-2.52557	1e-10	9.10933e-09	6.55018e-09	2699	tags=49%, list=14%, signal=43%	23208/114088/9900/8938/776/2932/84446/80331/9751/783/148/84961/5071/9515/23413/1488/8448/22871/8867/440279/28964/5217/6804/140730/321/140679/2572/22895/6861/6843/26059/9066/8573/5799/143425/320/22999/6622/5413/8224/774/4763/9627/8499/8447/8541/6844/148281/9162/8618/3356/9783/55607/5027/112476/63908/5582/2571/6854/5864/9699/10675/6857/6812/1141/1137/116443/9379/5579/6855/6860/815/6623/9256/11255/4…
GO NEUROTRANSMITTER TRANSPORT	NEUROTRANSMITTER TRANSPORT	268	-0.557158	-2.20421	1e-10	9.10933e-09	6.55018e-09	2899	tags=42%, list=15%, signal=36%	27445/79751/57084/808/23208/114088/9900/8938/3177/776/3358/2055/2932/84446/23446/55117/80331/9751/783/148/84961/5071/9515/23413/1488/8448/22871/2668/8867/440279/28964/5217/6804/140730/321/6534/2824/140679/2572/22895/6861/6843/26059/9066/5999/8573/5799/246213/143425/320/22999/6622/5413/3350/8224/9143/774/4763/9627/8499/8447/8541/477/6844/148281/9162/9899/8618/3356/83733/9783/6511/55607/5027/112476…
GO PASSIVE TRANSMEMBRANE TRANSPORTER ACTIVITY	PASSIVE TRANSMEMBRANE TRANSPORTER ACTIVITY	468	-0.480567	-1.99106	1e-10	9.10933e-09	6.55018e-09	2543	tags=28%, list=13%, signal=25%	776/6563/2906/2557/775/40/3776/27012/7222/3786/57348/6262/121601/2705/783/203859/8416/782/2903/54207/23413/3748/7220/3756/785/27112/57582/2904/11141/343450/10089/57165/23416/348980/1185/23507/2560/8911/8912/25769/56666/57719/123041/2743/59284/3775/8514/7881/6339/57657/59283/55799/774/777/2558/6261/9311/6334/10804/3746/56660/2561/2905/6326/2823/3747/3761/3760/9254/9127/56479/94015/131096/57156/781…
GO POSITIVE REGULATION OF CELL ACTIVATION	POSITIVE REGULATION OF CELL ACTIVATION	321	0.523065	1.93193	1e-10	9.10933e-09	6.55018e-09	2680	tags=33%, list=14%, signal=29%	3485/10630/301/3956/3115/3113/4323/972/4192/857/6347/2207/23529/3109/10451/7057/7305/8673/80381/54209/6352/1075/1026/1948/8651/7037/3689/80380/8764/50848/11221/54440/861/5819/1490/3606/1880/10673/84868/998/6195/4067/29108/7040/1803/1947/958/914/5341/64332/64581/3134/3133/3280/3965/10385/942/29126/199/5788/920/1050/3481/4860/3559/683/284467/7048/5159/2737/8660/864/5777/2150/10459/2268/3569/11027/1…
GO POSITIVE REGULATION OF CYTOKINE PRODUCTION	POSITIVE REGULATION OF CYTOKINE PRODUCTION	456	0.497241	1.88007	1e-10	9.10933e-09	6.55018e-09	3848	tags=36%, list=20%, signal=29%	301/5054/10631/6288/3115/3113/3315/972/4192/965/4060/3162/2207/23601/718/23643/29923/3556/6556/7057/7305/4615/929/1958/80381/54209/728/1535/79792/834/602/567/84282/7291/10417/5441/1051/8764/3148/7097/3659/54440/861/6772/2597/3606/84868/1649/3665/84818/9590/91543/29108/63940/7040/8692/958/1191/914/1536/64581/3304/338382/3428/719/3554/3134/64135/3133/3965/942/7096/841/29126/2149/199/5788/920/1545/5…
GO POSITIVE REGULATION OF DEFENSE RESPONSE	POSITIVE REGULATION OF DEFENSE RESPONSE	494	0.482924	1.83571	1e-10	9.10933e-09	6.55018e-09	3843	tags=35%, list=20%, signal=28%	4057/5054/6280/5320/4192/857/9180/6279/7132/5359/2207/718/23643/4615/929/8840/8673/54209/1513/1535/6352/1520/1075/5696/81622/5698/3689/83666/1051/3148/1268/7097/3659/1508/11314/5819/23180/3606/84868/1514/3665/3673/84818/4258/5714/4067/91543/81035/85363/29108/63940/8692/2896/5971/64332/64581/3304/338382/3428/3656/5701/8685/1956/3134/64135/3133/8717/92610/7128/7096/841/4582/146722/1050/5008/5688/57…
GO POSITIVE REGULATION OF RESPONSE TO BIOTIC STIMULUS	POSITIVE REGULATION OF RESPONSE TO BIOTIC STIMULUS	391	0.494452	1.85173	1e-10	9.10933e-09	6.55018e-09	3843	tags=35%, list=20%, signal=28%	4057/6280/857/6279/5359/2207/23643/4615/929/1513/1535/6352/1520/5696/81622/5698/3689/83666/3148/7097/3659/1508/11314/5819/23180/84868/1514/3665/5714/4067/91543/81035/85363/29108/2896/5971/64581/3304/338382/3428/3656/5701/8685/3134/64135/3133/9450/92610/7128/7096/841/29126/4582/146722/5688/5721/7314/3661/330/3055/340061/8737/5704/2150/79132/388325/115004/7867/11027/5686/51135/4282/7105/115362/5817…
GO POSTSYNAPTIC MEMBRANE	POSTSYNAPTIC MEMBRANE	330	-0.613279	-2.47681	1e-10	9.10933e-09	6.55018e-09	2869	tags=50%, list=15%, signal=44%	64506/88/1627/2912/57554/5728/3736/3092/3361/1007/57497/1399/25945/287/1496/2906/2557/775/2915/729993/50488/747/9228/80315/400745/57528/23362/23426/148/1630/27253/22866/2903/54413/7074/1949/23413/57120/3756/1759/4916/22871/2911/6900/10243/2904/11141/2560/388336/10142/22895/5802/2743/288/114/8777/59284/23345/22997/85358/59283/55227/26012/286/9148/84631/1742/10611/9762/2558/23229/84896/55906/347730…
GO POSTSYNAPTIC NEUROTRANSMITTER RECEPTOR ACTIVITY	POSTSYNAPTIC NEUROTRANSMITTER RECEPTOR ACTIVITY	76	-0.714618	-2.44834	1e-10	9.10933e-09	6.55018e-09	2477	tags=45%, list=13%, signal=39%	2906/2557/2915/8416/2903/2911/2904/2560/2743/2558/2561/2905/1132/2900/2554/2895/2892/1141/1137/2894/116443/2890/1128/2898/11255/2566/2565/2563/2556/2562/2893/2891/2902/2550
GO POSTSYNAPTIC SPECIALIZATION MEMBRANE	POSTSYNAPTIC SPECIALIZATION MEMBRANE	108	-0.664289	-2.40185	1e-10	9.10933e-09	6.55018e-09	2711	tags=59%, list=14%, signal=51%	3361/57497/25945/2906/2557/2915/729993/1630/22866/2903/7074/1949/22871/2911/10243/2904/388336/10142/5802/59284/59283/1742/2558/347730/145581/2561/2905/9162/401190/9127/81832/26045/57689/10368/2066/2900/491/2554/57555/1740/22986/2895/2892/64084/1008/8787/347731/1141/27092/2894/116443/64101/2890/1128/53616/3751/2898/114798/10369/2556/729956/2893/2891/2902
GO PRESYNAPTIC MEMBRANE	PRESYNAPTIC MEMBRANE	157	-0.626563	-2.36652	1e-10	9.10933e-09	6.55018e-09	2828	tags=50%, list=15%, signal=43%	23085/2912/3736/3737/3092/23208/1007/776/1496/23390/27255/9751/57528/148/27253/2903/79641/1949/3748/3756/1759/440279/134957/6804/140730/2572/26059/9066/8573/5802/114/320/22999/2558/9627/3746/322/2913/6326/2823/3747/3760/57863/9162/401190/3356/9783/6511/22859/2066/2900/112476/84966/57555/9699/1008/6857/6812/6506/1141/5818/1137/85445/1128/6529/6855/2898/53826/84628/6616/9378/112755/23025/1272/3765/…
GO REGULATION OF IMMUNE EFFECTOR PROCESS	REGULATION OF IMMUNE EFFECTOR PROCESS	389	0.541332	2.02826	1e-10	9.10933e-09	6.55018e-09	3415	tags=35%, list=18%, signal=29%	301/3958/710/3598/715/972/7042/716/3426/3162/2207/2302/684/23529/718/3109/713/712/8673/11326/728/714/5627/5880/567/3075/7037/10417/3689/83666/56833/8764/10875/60489/51191/11221/54440/11314/6772/5819/3077/3606/2217/84868/717/84695/4067/151636/91543/29108/7040/2213/284/2896/958/1191/64332/2242/2/719/3554/3134/200316/100507436/3133/3965/7128/942/5788/3559/2821/330/4277/340061/79594/5777/2150/79132/7…
GO REGULATION OF LEUKOCYTE PROLIFERATION	REGULATION OF LEUKOCYTE PROLIFERATION	221	0.595033	2.1397	1e-10	9.10933e-09	6.55018e-09	2680	tags=37%, list=14%, signal=32%	3485/301/3958/5320/10457/3115/3113/972/2302/684/23529/3109/10451/6385/7305/80381/11326/6352/5880/1026/7037/196/57045/80380/1051/8764/2615/3659/54440/11314/3606/1880/10673/84868/836/4067/29108/2213/1947/958/3133/3280/3965/7128/10385/942/29126/199/5788/920/3481/51083/4860/3559/683/7048/8660/5777/7940/7133/2064/3569/916/51043/4282/51293/8772/3718/10859/10288/4004/7412/7784/7293/6850/695/4332/3071/11…
GO REGULATION OF LYMPHOCYTE ACTIVATION	REGULATION OF LYMPHOCYTE ACTIVATION	421	0.497974	1.87526	1e-10	9.10933e-09	6.55018e-09	3451	tags=34%, list=18%, signal=29%	3485/301/3958/3956/5320/10457/3115/3113/4323/972/4192/857/6347/2302/23529/3111/3109/10451/6385/7305/80381/11326/6352/5880/1026/1948/8651/7037/196/57045/80380/1051/56833/8764/10875/2615/3659/11221/54440/861/11314/3077/3606/1880/10673/84868/836/84695/998/678/4067/29108/7040/2213/1803/1947/958/914/64332/64581/3134/100507436/3133/3280/3965/7128/10385/942/29126/199/5788/920/3481/51083/4860/3559/683/70…
GO REGULATION OF MEMBRANE POTENTIAL	REGULATION OF MEMBRANE POTENTIAL	424	-0.524725	-2.1605	1e-10	9.10933e-09	6.55018e-09	2543	tags=35%, list=13%, signal=31%	776/2259/287/2906/2557/775/40/3776/2915/55186/57369/2932/5649/3786/6262/65018/783/148/5071/6714/2903/54413/54207/4355/3756/785/4916/22871/2911/11060/2904/6804/140730/10089/23416/348980/2560/10962/8911/10142/274/8912/5530/3799/5999/2258/2743/288/22999/6622/3775/22997/85358/57657/774/1742/777/2558/6334/3746/2729/477/637/56660/2561/2905/79784/6326/3747/3760/9162/401190/9127/23373/4092/81832/885/1310…
GO REGULATION OF NEURON PROJECTION DEVELOPMENT	REGULATION OF NEURON PROJECTION DEVELOPMENT	494	-0.41851	-1.74395	1e-10	9.10933e-09	6.55018e-09	2895	tags=36%, list=15%, signal=31%	29116/57643/1627/51760/57688/57556/57554/5728/4976/79791/27124/54700/57611/10084/1399/5753/163404/1496/4649/23098/2803/151835/7025/2932/84446/5649/2534/8437/6792/10716/221914/23426/23108/1809/10152/6091/1630/115703/5071/54413/26039/23105/7074/57520/1949/2909/23413/153090/7473/5048/4916/55754/57698/22871/23189/9362/659/146760/118813/6900/22891/8997/5364/27/6376/2033/11141/22876/6453/57498/23053/55…
GO REGULATION OF NEUROTRANSMITTER SECRETION	REGULATION OF NEUROTRANSMITTER SECRETION	105	-0.672589	-2.41942	1e-10	9.10933e-09	6.55018e-09	2142	tags=51%, list=11%, signal=46%	808/23208/8938/776/2932/783/148/84961/5071/9515/23413/22871/28964/5217/6804/140730/321/6843/9066/8573/143425/320/22999/6622/5413/4763/9627/8499/9162/3356/9783/55607/112476/63908/5582/5864/9699/10675/6857/6812/1141/1137/116443/5579/6855/6860/815/6623/41/6853/112755/23025/10815/10814
GO REGULATION OF PEPTIDASE ACTIVITY	REGULATION OF PEPTIDASE ACTIVITY	431	0.5009	1.88415	1e-10	9.10933e-09	6.55018e-09	2234	tags=25%, list=12%, signal=23%	7076/4057/5054/710/4318/358/6280/871/7422/5118/960/857/2152/2335/9232/5265/5266/332/6279/2537/646424/684/4804/5329/718/3491/114769/7057/5104/2192/5176/4504/837/12/5627/1800/834/56925/1471/1992/5696/5698/355/83596/286204/1475/5918/1293/6590/5271/2597/1490/1611/2876/6195/135228/5269/4067/7035/3065/29108/57333/831/2896/64581/1893/2/3428/10542/8530/581/8717/3965/8795/4193/841/2149/1509/10395/51499/40…
GO REGULATION OF POSTSYNAPTIC MEMBRANE POTENTIAL	REGULATION OF POSTSYNAPTIC MEMBRANE POTENTIAL	143	-0.698324	-2.62621	1e-10	9.10933e-09	6.55018e-09	2524	tags=48%, list=13%, signal=42%	2259/2906/2557/2915/2932/5649/2903/54413/4355/22871/2911/2904/6804/2560/5530/5999/2743/22999/6622/22997/85358/1742/2558/2561/2905/9162/401190/9127/81832/55607/5590/2900/8001/388135/5027/18/2554/57555/50944/2895/2892/9699/22941/124925/1141/1137/2894/116443/2890/1128/56853/3751/57030/2898/23542/23316/9378/112755/2566/869/2565/2563/2556/2562/2893/2891/2902/2550
GO REGULATION OF SYNAPTIC PLASTICITY	REGULATION OF SYNAPTIC PLASTICITY	186	-0.613075	-2.34225	1e-10	9.10933e-09	6.55018e-09	2535	tags=49%, list=13%, signal=43%	152330/2259/2906/2915/729993/2932/84446/5649/6770/6343/23154/4761/794/5270/2903/54413/4355/22871/440279/6900/3815/11170/6376/2904/140730/10858/388336/1979/25769/9066/8831/114/2648/22999/9693/6622/57282/85358/26012/9148/1742/4763/347730/348/57406/8541/2905/6844/9162/5532/23373/81832/26045/9783/55607/5590/112476/9145/4900/22986/50944/22849/2895/5864/9699/3766/22941/6547/6812/4130/2890/6855/6860/289…
GO REGULATION OF SYNAPTIC VESICLE CYCLE	REGULATION OF SYNAPTIC VESICLE CYCLE	112	-0.688092	-2.49853	1e-10	9.10933e-09	6.55018e-09	2806	tags=59%, list=15%, signal=51%	808/5728/23208/5575/6517/776/2259/1609/2932/84446/80331/783/148/84961/27253/54413/9515/23413/114781/1759/22871/28964/5217/6804/140730/321/56850/6843/9066/8573/143425/320/22999/6622/5413/8499/9162/5532/3356/9783/112476/63908/57555/5582/5864/9699/10675/6857/6812/8927/1141/9024/1137/116443/5579/6855/6860/57030/6853/26052/9378/112755/8851/11069/10815/10814
GO REGULATION OF TRANS SYNAPTIC SIGNALING	REGULATION OF TRANS SYNAPTIC SIGNALING	442	-0.571828	-2.37263	1e-10	9.10933e-09	6.55018e-09	2632	tags=44%, list=14%, signal=39%	5575/57497/9465/8938/776/152330/2259/6146/2906/2915/729993/23096/2932/84446/5649/2534/6770/65018/6343/23154/11188/783/148/84961/4761/1630/794/5071/27253/5270/6714/2903/54413/9515/4355/1949/23413/1759/29/5332/22871/2668/2911/440279/6900/590/3815/11170/28964/6376/5217/2904/23228/6804/140730/10858/321/388336/1979/10142/7804/4884/5530/84687/6843/25769/3799/9066/5999/8573/8831/5802/143425/114/320/2648…
GO REGULATION OF VASCULATURE DEVELOPMENT	REGULATION OF VASCULATURE DEVELOPMENT	317	0.52011	1.92165	1e-10	9.10933e-09	6.55018e-09	2730	tags=33%, list=14%, signal=29%	1116/301/5054/51330/1284/4223/27286/3627/358/133/10457/7422/6648/126393/3315/7042/4192/2152/3576/3202/3678/3162/285/4804/11117/718/8038/7057/57381/10253/7852/1958/5176/728/3339/1634/1948/51129/7291/2022/80310/3689/7101/6237/187/1969/6672/7060/3688/5764/861/5230/3099/6772/641700/10553/56005/8829/7453/2896/958/1536/1893/2828/719/23129/2013/3696/7128/90993/161742/9723/1545/5315/8877/23670/23166/1106…
GO RESPONSE TO INTERFERON GAMMA	RESPONSE TO INTERFERON GAMMA	194	0.615807	2.18136	1e-10	9.10933e-09	6.55018e-09	2716	tags=43%, list=14%, signal=37%	7431/9021/3122/3123/3115/3113/2633/960/10410/3117/965/3127/6347/3119/684/7791/3118/6556/2634/3383/4938/10581/4435/834/6352/567/8651/4939/3460/2635/83666/9111/4940/6737/4502/6672/7097/3659/10346/3120/6772/2597/445/998/3665/8638/2209/85363/958/338382/4843/8519/55337/3134/3133/3965/817/4261/199/4641/29927/58191/3661/3055/1594/9341/55647/10096/6364/115361/54625/2643/71/115362/84166/10475/5724/6362/74…
GO RESPONSE TO MOLECULE OF BACTERIAL ORIGIN	RESPONSE TO MOLECULE OF BACTERIAL ORIGIN	343	0.53114	1.97502	1e-10	9.10933e-09	6.55018e-09	2871	tags=32%, list=15%, signal=28%	4057/5054/7431/3627/133/4129/55970/3576/6279/6347/23643/4016/114769/6556/3383/4615/929/57817/54209/728/706/7538/4435/1634/834/6352/10417/80380/2706/1051/3148/1268/3726/7097/6373/9516/3725/11221/6590/3606/84868/836/2353/4283/1019/445/7056/4258/8754/4067/7035/9590/85363/29108/7040/2213/958/4843/2687/3656/54/9450/3965/7128/942/1234/7096/841/29126/2149/342979/22904/3661/129607/3055/1594/4257/7133/785…
GO RESPONSE TO VIRUS	RESPONSE TO VIRUS	322	0.547144	2.02181	1e-10	9.10933e-09	6.55018e-09	3628	tags=37%, list=19%, signal=30%	3627/2633/3315/10410/6036/27350/2537/5359/684/9636/8061/2316/59/7852/4938/4599/10577/10581/602/6352/10561/4939/81622/3460/10417/6039/2635/83666/4940/10875/60489/51191/3659/10346/55509/6772/64782/4283/3665/5551/8638/151636/91543/85363/29108/8692/63901/958/1191/9582/8519/3428/3669/10542/55337/3588/64135/200316/100507436/3965/7128/2023/5788/1021/3159/3559/3661/4343/330/3429/4277/340061/64108/79594/2…
GO SIGNAL RELEASE	SIGNAL RELEASE	458	-0.461829	-1.91191	1e-10	9.10933e-09	6.55018e-09	2627	tags=31%, list=14%, signal=28%	9900/10765/6720/8938/776/9854/3358/775/1393/5950/6755/2932/84446/4760/80331/9751/9572/6343/783/148/84961/10411/5071/9515/7432/7074/23413/5781/1488/8448/22871/8867/440279/8997/6934/1908/2740/28964/5217/91608/6804/140730/6453/94121/321/140679/2572/22895/5530/6861/6843/26059/3799/9066/8573/5799/22841/143425/114/320/22999/6622/5413/3350/8224/3156/4828/55638/774/1394/777/4763/7349/9627/8499/8447/8541/…
GO SYNAPSE ASSEMBLY	SYNAPSE ASSEMBLY	176	-0.579939	-2.21399	1e-10	9.10933e-09	6.55018e-09	1818	tags=34%, list=9%, signal=31%	4916/22871/5364/11141/10507/5802/6622/92737/85358/84631/10611/347730/145581/2561/147381/119/2823/23284/64218/26045/22859/55607/2066/26050/9231/2554/57555/50944/5789/2895/654429/9806/57633/4038/64084/22941/8927/347731/1141/5818/64101/9379/577/1826/575/84628/114798/375323/23316/26052/9378/2566/869/4915/2047/2562/6712/6585/2902
GO SYNAPSE ORGANIZATION	SYNAPSE ORGANIZATION	410	-0.500638	-2.048	1e-10	9.10933e-09	6.55018e-09	2142	tags=36%, list=11%, signal=33%	783/58504/10152/4761/115703/27253/782/22866/1639/54413/9758/7074/153090/1488/5048/785/4916/22871/2668/440279/6900/22891/8997/5364/6376/5217/389941/56098/10243/2904/11141/6453/388336/56850/10507/1501/7804/25791/26059/8831/4628/5064/7248/5802/2743/288/3480/6622/92737/22997/85358/1741/10479/9148/84631/55619/55638/1742/10611/9762/55906/347730/4744/8499/145581/348/2561/147381/80725/119/2823/23284/9912…
GO SYNAPTIC MEMBRANE	SYNAPTIC MEMBRANE	437	-0.603453	-2.50087	1e-10	9.10933e-09	6.55018e-09	2869	tags=50%, list=15%, signal=44%	64506/88/339453/1627/23085/2912/57554/5728/3736/3737/3092/3361/23208/1007/57497/1399/25945/776/287/1496/2906/2557/775/2915/729993/23390/50488/747/27255/9228/80315/9751/400745/57528/23362/23426/148/1630/794/27253/22866/2903/54413/79641/4355/7074/1949/23413/57120/3748/3756/1759/4916/22871/2911/8867/440279/6900/134957/10243/2904/11141/6804/140730/2560/388336/10142/2572/22895/84687/26059/9066/8573/50…
GO SYNAPTIC VESICLE EXOCYTOSIS	SYNAPTIC VESICLE EXOCYTOSIS	116	-0.660303	-2.40846	1e-10	9.10933e-09	6.55018e-09	2302	tags=50%, list=12%, signal=44%	2932/80331/9751/783/148/84961/9515/23413/1488/8448/22871/8867/440279/28964/5217/6804/140730/321/6861/6843/26059/9066/8573/143425/320/22999/6622/5413/8499/8447/8541/6844/148281/9162/8618/3356/9783/5027/112476/63908/5582/5864/9699/10675/6857/6812/1141/1137/116443/5579/6855/6860/6853/6616/112755/23025/10815/10814
GO SYNAPTIC VESICLE MEMBRANE	SYNAPTIC VESICLE MEMBRANE	109	-0.667421	-2.41829	1e-10	9.10933e-09	6.55018e-09	2281	tags=45%, list=12%, signal=40%	57084/808/23208/9900/81615/5869/80331/7781/8448/440279/6804/23312/140679/2572/22895/6861/6843/9066/5799/23176/246213/273/5802/143425/6622/8224/9143/132204/6844/148281/9899/5874/112476/9145/388662/6854/5864/192683/6857/8927/115827/6855/6860/57030/6853/23025/55530/534/6456
GO TRANSPORTER COMPLEX	TRANSPORTER COMPLEX	329	-0.538791	-2.1723	1e-10	9.10933e-09	6.55018e-09	2477	tags=34%, list=13%, signal=30%	2906/2557/775/3306/3776/729993/27012/7222/3786/486/57348/6262/783/402117/375567/782/2903/118427/3748/7220/3756/785/22871/134957/2904/6804/348980/23507/2560/388336/8911/10142/8912/1804/2743/59284/20/3775/8514/7881/85358/1741/59283/55227/55799/10367/774/1742/777/2558/6261/6334/3746/57406/477/2561/2905/6844/6326/3747/3761/3760/9254/56479/94015/781/10368/610/6323/2900/8001/56262/3780/2554/773/1740/50…
GO T CELL ACTIVATION	T CELL ACTIVATION	464	0.516493	1.95391	1e-10	9.10933e-09	6.55018e-09	3451	tags=36%, list=18%, signal=31%	3485/301/3958/3956/4478/5320/10457/3115/3113/972/960/4192/857/6347/2207/2302/977/3111/3109/6385/6556/3383/1958/80381/11326/602/6352/5880/1948/8651/7037/10945/57045/80380/1051/8764/10875/10312/8324/1650/2615/3659/11221/54440/861/11314/3077/3606/1880/10673/84868/836/84695/998/3936/678/4067/91543/29108/2213/1803/2000/1947/914/5971/64332/64581/581/5873/100507436/3133/3280/3965/10385/2280/942/841/2912…
GO VESICLE LUMEN	VESICLE LUMEN	326	0.628986	2.32801	1e-10	9.10933e-09	6.55018e-09	2814	tags=40%, list=15%, signal=35%	1116/7076/4057/5054/5919/2171/302/710/6282/6280/5806/7422/4069/7042/2335/87/5265/5836/6279/6036/7114/5154/2162/718/2519/3310/7057/2512/10577/12/5627/3074/79792/567/1075/1992/10549/1522/8836/7450/3959/2990/5552/5478/2799/9535/2717/240/3240/3671/2517/51816/6590/1675/23406/9588/10092/79980/2720/83706/5476/29108/7040/10447/2896/1191/81/1893/2/1265/3101/25797/5701/1956/5873/7044/23593/9961/126014/5527…
GO VESICLE MEDIATED TRANSPORT IN SYNAPSE	VESICLE MEDIATED TRANSPORT IN SYNAPSE	213	-0.63296	-2.46751	1e-10	9.10933e-09	6.55018e-09	2899	tags=51%, list=15%, signal=44%	27445/57084/808/5728/23208/114088/5575/9900/6517/776/2259/1609/2932/84446/80331/9751/23426/783/148/84961/27253/54413/9515/23413/114781/1488/85439/1759/8448/22871/8867/440279/134957/28964/5217/6804/140730/6453/321/56850/140679/6861/3208/6843/26059/163/9066/8573/246213/273/143425/320/22999/6622/5413/84162/8224/84896/8499/8447/8541/6844/148281/64854/9162/8618/5532/9829/5874/3356/5602/9783/50632/5027…
GO GABA ERGIC SYNAPSE	GABA ERGIC SYNAPSE	72	-0.720674	-2.43247	1.18585e-10	1.06351e-08	7.6473e-09	2089	tags=54%, list=11%, signal=48%	148/27253/54413/1488/2560/140679/26059/9066/2743/22997/84631/2558/347730/2982/145581/57406/2561/1012/492/26045/2066/388662/491/2554/57555/10675/1008/8927/440073/23236/6529/3751/114798/9378/2566/2563/2556/2562/2550
GO BLOOD MICROPARTICLE	BLOOD MICROPARTICLE	113	0.6576	2.22384	1.19863e-10	1.06351e-08	7.6473e-09	1375	tags=28%, list=7%, signal=26%	1192/710/715/4478/716/2335/308/2162/1356/718/3310/713/714/12/5627/3075/51129/7037/8542/3959/2022/3240/3043/3039/5216/7040/1191/3304/60/2/72/3512
GO PLATELET ALPHA GRANULE LUMEN	PLATELET ALPHA GRANULE LUMEN	66	0.74485	2.32098	1.2272e-10	1.0749e-08	7.72918e-09	2047	tags=44%, list=11%, signal=39%	7076/5054/710/7422/7042/2335/87/5265/7114/5154/2162/7057/12/5627/7450/5552/3671/1675/83706/7040/1191/81/2/7044/3481/3082/22915/7043/5155
GO REGULATION OF CELL CELL ADHESION	REGULATION OF CELL CELL ADHESION	399	0.483469	1.81461	1.46744e-10	1.26905e-08	9.12529e-09	2680	tags=29%, list=14%, signal=25%	3485/10630/301/3958/3956/5320/10457/7422/3115/3113/972/960/4192/857/6347/2302/3109/6385/3383/80381/11326/6352/1948/8651/182/7037/53827/6591/23075/3689/57045/80380/1051/8764/10875/50848/2615/3659/11221/54440/861/11314/114897/3077/3606/8728/10673/84868/91663/836/84695/445/998/83706/4067/29108/7040/3037/2213/1803/1947/928/64332/3133/3280/3965/10385/942/29126/199/5788/920/3481/10272/51176/4860/3559/1…
GO RESPONSE TO TUMOR NECROSIS FACTOR	RESPONSE TO TUMOR NECROSIS FACTOR	300	0.515704	1.89715	1.56823e-10	1.33927e-08	9.63019e-09	3826	tags=39%, list=20%, signal=31%	1116/51330/10631/1277/2633/3576/965/255743/6347/7114/7132/4982/114769/2634/7057/3383/55504/929/57817/837/7538/1535/834/6352/5696/5698/8531/2635/8764/83483/6772/10673/836/4055/445/8754/5714/678/9590/29108/3037/8692/958/81/3304/2687/8970/84817/5701/8717/7128/841/1050/8877/5688/58191/5721/83643/330/3987/8737/5704/2150/7133/11173/6364/5686/2643/60401/84888/149951/7185/672/5692/5711/5691/6362/80149/74…
GO POSTSYNAPTIC DENSITY MEMBRANE	POSTSYNAPTIC DENSITY MEMBRANE	82	-0.688449	-2.40172	1.74407e-10	1.47105e-08	1.05778e-08	2622	tags=60%, list=14%, signal=52%	57497/25945/2906/2915/729993/1630/22866/2903/7074/1949/2911/2904/388336/10142/5802/59284/59283/1742/145581/2905/9162/401190/81832/26045/57689/10368/2066/2900/491/1740/22986/2895/2892/64084/8787/347731/27092/2894/116443/64101/2890/1128/53616/2898/114798/10369/2893/2891/2902
GO PEPTIDASE REGULATOR ACTIVITY	PEPTIDASE REGULATOR ACTIVITY	217	0.55952	2.00667	2.11334e-10	1.76077e-08	1.2661e-08	2234	tags=25%, list=12%, signal=22%	7076/4057/5054/710/871/5118/857/2335/9232/5265/5266/332/646424/684/718/114769/5104/2192/5176/4504/12/5627/1800/834/56925/1075/1471/1992/286204/1475/5918/1293/6590/5271/2597/6195/135228/5269/7035/29108/831/2/8530/400410/51176/5721/330/10406/1476/221476/26577/7980/5973/8996
GO REGULATION OF NEUROTRANSMITTER TRANSPORT	REGULATION OF NEUROTRANSMITTER TRANSPORT	140	-0.590261	-2.20956	2.32055e-10	1.91012e-08	1.37349e-08	2699	tags=46%, list=14%, signal=40%	23208/9900/8938/776/3358/2932/783/148/84961/5071/9515/23413/22871/2668/28964/5217/6804/140730/321/2824/6843/9066/5999/8573/143425/320/22999/6622/5413/3350/4763/9627/8499/477/9162/3356/9783/55607/5027/112476/18/63908/5582/5864/9699/10675/6857/6812/1141/1137/116443/5579/6529/6855/6860/815/4878/6623/11255/41/6853/112755/23025/10815/10814
GO ANTIMICROBIAL HUMORAL RESPONSE	ANTIMICROBIAL HUMORAL RESPONSE	118	0.643778	2.17777	2.36464e-10	1.92324e-08	1.38293e-08	2790	tags=27%, list=15%, signal=23%	4057/5919/3627/6280/5320/4069/3576/5266/6279/85236/6556/602/10417/6039/6373/6590/2597/4283/140823/3151/1191/8970/3133/3512/10578/6037/2919/6170/8349/6223/51248/8347
GO SODIUM ION TRANSPORT	SODIUM ION TRANSPORT	219	-0.51773	-2.01484	2.66815e-10	2.14457e-08	1.54208e-08	2255	tags=26%, list=12%, signal=24%	10768/55117/486/6550/286183/5270/65125/57520/115584/348980/84679/8911/8912/25769/3799/57731/123041/246213/2258/9962/288/3775/6339/57282/57657/10479/23072/53822/8671/9311/6334/477/6326/4302/81832/610/6323/5027/5581/154215/57419/65268/6327/6547/81539/259232/79570/57030/53826/2257/6328/41/6543/1272/55800/128414/55515/478
GO VOLTAGE GATED CATION CHANNEL ACTIVITY	VOLTAGE GATED CATION CHANNEL ACTIVITY	141	-0.583141	-2.18446	2.82311e-10	2.24273e-08	1.61266e-08	2543	tags=41%, list=13%, signal=36%	776/2906/775/3776/27012/3786/783/8416/782/2903/23413/3748/3756/785/57582/2904/11141/343450/23416/348980/8911/8912/59284/3775/8514/7881/57657/59283/55799/774/777/6261/3746/2905/3747/3761/3760/9254/56479/131096/781/10368/610/773/3766/27092/116443/3751/3777/3785/9256/6616/10369/3745/3767/3765/2902/30819
GO NEGATIVE REGULATION OF CELL ACTIVATION	NEGATIVE REGULATION OF CELL ACTIVATION	198	0.568866	2.02717	3.39235e-10	2.66397e-08	1.91556e-08	2500	tags=35%, list=13%, signal=31%	301/3958/3598/5320/10457/972/4192/3162/5154/2302/11117/6385/7305/11326/8651/57045/80380/1051/8764/10875/1268/2615/3659/861/11314/114897/3077/84868/836/84695/7056/4067/2213/2896/928/8530/3134/100507436/3965/7128/10385/942/29126/146722/5788/51083/284021/3559/284467/2737/79626/64092/864/5777/84959/7940/2064/2268/51043/5155/10019/3566/3718/10859/10288/80149/865/695/4332
GO ACTIVATION OF INNATE IMMUNE RESPONSE	ACTIVATION OF INNATE IMMUNE RESPONSE	316	0.507835	1.87436	3.90253e-10	3.02978e-08	2.1786e-08	3837	tags=36%, list=20%, signal=29%	4057/6280/857/6279/2207/23643/4615/929/1513/1535/1520/5696/81622/5698/3689/7097/3659/1508/11314/23180/84868/1514/3665/5714/4067/91543/81035/85363/29108/5971/64581/3304/338382/3428/3656/5701/8685/64135/92610/7128/7096/841/4582/146722/5688/5721/7314/3661/330/3055/340061/8737/5704/2150/79132/388325/115004/7867/11027/5686/51135/7105/10211/9641/4893/8915/8772/7184/5692/5711/5691/6850/695/4332/5682/421…
GO REGULATION OF HEMOPOIESIS	REGULATION OF HEMOPOIESIS	467	0.461219	1.74433	4.02478e-10	3.08959e-08	2.2216e-08	3473	tags=34%, list=18%, signal=29%	301/4057/3958/4323/972/4192/3202/4015/28959/3976/56892/2302/3111/760/9636/55365/7057/7305/10398/54209/714/7538/4005/8651/5696/182/5698/1051/56833/10875/3148/3659/5764/3725/11221/54440/861/6772/6688/3059/3606/3204/2353/84695/3665/2124/5714/678/4067/3020/3065/7040/2213/9398/914/64332/2242/3304/338382/5292/7071/1230/5701/1636/3280/3965/10385/942/841/8365/5788/920/1021/8294/85477/55170/10272/10413/51…
GO NEGATIVE REGULATION OF LYMPHOCYTE ACTIVATION	NEGATIVE REGULATION OF LYMPHOCYTE ACTIVATION	148	0.609573	2.10406	4.27498e-10	3.24518e-08	2.33349e-08	2500	tags=35%, list=13%, signal=31%	301/3958/5320/10457/972/4192/2302/6385/7305/11326/8651/57045/80380/1051/8764/10875/2615/3659/861/11314/3077/84868/836/84695/4067/2213/3134/100507436/3965/7128/10385/942/29126/51083/3559/2737/79626/64092/864/5777/7940/2064/2268/51043/3566/3718/10859/10288/80149/865/695/4332
GO GRANULOCYTE MIGRATION	GRANULOCYTE MIGRATION	139	0.613542	2.1015	4.86529e-10	3.65271e-08	2.62653e-08	3890	tags=45%, list=20%, signal=36%	301/5919/3958/6288/3627/6280/972/7042/4192/3576/6279/6347/2207/10451/7057/728/3269/6352/5880/4267/3689/56833/7060/6373/11314/5175/4283/84818/51192/719/3554/9948/3672/683/5734/6364/51135/1441/2919/391/30817/6362/3557/6850/79647/3071/7857/7409/83700/6283/84522/57580/5473/5293/6372/1525/3552/3553/708/6354/5294/5879/3579
GO ANTIGEN PROCESSING AND PRESENTATION OF PEPTIDE ANTIGEN VIA MHC CLASS I	ANTIGEN PROCESSING AND PRESENTATION OF PEPTIDE ANTIGEN VIA MHC CLASS I	96	0.668383	2.20317	4.91898e-10	3.65288e-08	2.62665e-08	4387	tags=67%, list=23%, signal=52%	2207/8673/1535/567/5696/5698/9871/3077/6890/2217/811/5714/2209/2923/3140/1536/4688/5701/1636/3134/100507436/3133/4689/653361/5688/5721/9341/4277/3693/55080/5704/9554/5686/10134/5692/5711/5691/3685/563/5682/5683/5690/50856/5689/64167/10437/8773/5720/5700/10213/5699/6892/22872/5718/821/5684/948/6891/5719/5685/6396/5715/5708/51752
GO REGULATION OF T CELL ACTIVATION	REGULATION OF T CELL ACTIVATION	314	0.508284	1.87353	5.05632e-10	3.71449e-08	2.67095e-08	3451	tags=35%, list=18%, signal=29%	3485/301/3958/3956/5320/10457/3115/3113/972/4192/857/6347/2302/3111/3109/6385/80381/11326/6352/5880/1948/8651/7037/57045/80380/1051/8764/10875/2615/3659/11221/54440/861/11314/3077/3606/10673/84868/836/84695/998/4067/29108/2213/1803/1947/914/64332/3133/3280/3965/10385/942/29126/199/5788/920/3481/4860/3559/7048/2737/27166/79626/864/5777/7133/2064/115004/3569/11006/916/51043/3566/8915/2177/2319/8772…
GO REGULATION OF NEUROTRANSMITTER LEVELS	REGULATION OF NEUROTRANSMITTER LEVELS	341	-0.455185	-1.84589	5.2065e-10	3.78413e-08	2.72103e-08	2762	tags=34%, list=14%, signal=30%	808/9722/22914/23208/114088/1373/9900/8938/3177/776/23576/51222/2055/747/2932/84446/5153/23446/80331/9751/55349/783/148/84961/5071/2903/9515/23413/114781/1488/8448/22871/2668/8867/440279/590/100528032/28964/5217/6804/140730/321/2824/140679/2572/22895/6861/6843/26059/9066/5999/8573/10247/5799/143425/320/22999/6622/5413/3350/8224/9143/774/4763/9627/26227/8499/8447/8541/477/6844/148281/9162/8618/335…
GO PLATELET DEGRANULATION	PLATELET DEGRANULATION	126	0.628217	2.14355	5.33159e-10	3.81467e-08	2.74299e-08	2058	tags=38%, list=11%, signal=34%	7076/5054/5919/8407/710/7422/7042/2335/87/5265/7114/308/5154/2207/2162/967/2316/7057/12/5627/7450/3959/5552/3671/5175/1675/51706/10184/83706/135228/4067/7873/7040/10447/1191/928/5341/81/1893/2/9948/7044/3481/3082/22915/7043/5155/3690
GO ANTIGEN PROCESSING AND PRESENTATION	ANTIGEN PROCESSING AND PRESENTATION	224	0.552667	1.98863	5.36019e-10	3.81467e-08	2.74299e-08	3779	tags=48%, list=20%, signal=39%	3122/83871/3123/3115/3113/972/10981/3117/3127/3119/2207/3108/3111/3118/3109/11004/6556/7057/3383/24137/8673/54209/1535/1520/567/5696/5698/10875/1175/3120/9493/9871/829/3077/23180/6890/2217/8905/1514/811/5714/2209/29108/2213/2923/3140/1536/5971/4688/29127/5701/1636/5873/3134/100507436/3133/81930/4689/1509/653361/830/5688/5721/9341/4277/3693/55080/5704/9554/1062/5686/56992/83547/10134/5692/5711/569…
GO LEUKOCYTE CHEMOTAXIS	LEUKOCYTE CHEMOTAXIS	220	0.547504	1.96696	6.25708e-10	4.40705e-08	3.16894e-08	4051	tags=43%, list=21%, signal=34%	301/5054/5919/3958/6288/3627/6280/7422/972/7042/4192/3576/9547/6279/6347/2207/10451/7057/7852/728/3269/6352/5880/23075/3689/56833/7060/6373/5764/1843/1880/80270/4283/84818/811/4067/196527/63940/51192/1230/719/3965/1234/3672/199/683/58191/2150/6364/3569/4282/4856/5155/1441/2919/80024/54795/30817/6362/3557/6850/79647/3071/7474/11151/6223/7857/7409/83700/6283/3586/8740/79902/57580/5473/5293/6372/152…
GO ACIDIC AMINO ACID TRANSPORT	ACIDIC AMINO ACID TRANSPORT	67	-0.712798	-2.39566	6.47582e-10	4.51458e-08	3.24626e-08	1297	tags=45%, list=7%, signal=42%	6804/246213/320/22999/6622/4763/8499/8541/477/6844/83733/885/6511/5027/18/56262/5864/3766/6857/6812/6506/6529/6860/57030/6505/9256/11255/6616/4915/10815
GO SODIUM ION TRANSMEMBRANE TRANSPORTER ACTIVITY	SODIUM ION TRANSMEMBRANE TRANSPORTER ACTIVITY	155	-0.577185	-2.17493	6.55695e-10	4.52496e-08	3.25372e-08	1576	tags=25%, list=8%, signal=23%	348980/84679/6534/8911/8912/25769/123041/9962/3775/6339/57282/57657/10479/8671/9311/6334/477/6326/6511/610/6323/2900/388662/57419/6327/6547/6506/81539/6529/259232/57030/6505/2898/6328/41/6543/55800/55515/478
GO VACUOLAR LUMEN	VACUOLAR LUMEN	172	0.58216	2.03343	6.77135e-10	4.62619e-08	3.32652e-08	4025	tags=52%, list=21%, signal=41%	2331/2171/302/633/4069/972/4060/6036/718/2519/6385/2512/6382/10577/3339/1513/12/3074/1634/1520/1075/8836/2990/2799/1508/2717/2517/51816/9588/1514/6383/79980/2720/5476/29108/2896/2817/23593/1509/10487/10383/5159/175/6037/25801/54749/4125/8635/55313/6386/10493/2239/51316/4758/203068/410/4332/5538/29952/2719/3614/8804/10082/27163/2588/1464/58485/6448/3073/3920/6948/5580/6609/10437/2629/2581/2992/567…
GO MAIN AXON	MAIN AXON	67	-0.710665	-2.38849	8.24695e-10	5.57853e-08	4.01131e-08	2791	tags=66%, list=15%, signal=56%	57554/3736/3737/287/1393/6711/22933/747/3786/7074/1759/6900/57165/274/57731/23136/288/56288/8514/7881/286/1742/7349/6334/3746/322/6326/3747/89796/885/6323/57471/6695/1740/4099/4130/6506/4155/4133/3785/10382/4137/26047/3767
GO ENTRY INTO HOST	ENTRY INTO HOST	133	0.617025	2.11034	9.32382e-10	6.24513e-08	4.49064e-08	2716	tags=39%, list=14%, signal=34%	3956/5806/972/857/3576/10410/3678/23601/2519/3383/7852/8673/10581/858/1948/7037/983/8764/6510/6737/1969/5478/50848/3688/1508/5819/4233/3673/5034/85363/1803/8692/3304/8519/290/1956/3965/942/1234/920/3693/3690/5817/10572/10475/6993/79581/7293/8724/3685/9076/2934
GO VOLTAGE GATED ION CHANNEL ACTIVITY	VOLTAGE GATED ION CHANNEL ACTIVITY	196	-0.526232	-2.03296	9.95071e-10	6.60032e-08	4.74604e-08	2769	tags=38%, list=14%, signal=33%	1183/3736/3737/1182/776/2906/775/3776/27012/3786/783/8416/782/2903/54207/23413/3748/3756/785/57582/2904/11141/343450/10089/23416/348980/1185/8911/8912/59284/3775/8514/7881/57657/59283/55799/774/777/6261/6334/3746/56660/2905/6326/3747/3761/3760/9254/56479/131096/781/10368/610/6323/773/6327/3766/27092/116443/259232/3751/3777/6328/3785/9256/6616/10369/55800/3745/3767/3765/2902/30818/30819
GO MYELOID LEUKOCYTE MIGRATION	MYELOID LEUKOCYTE MIGRATION	206	0.552108	1.96903	1.01413e-09	6.66206e-08	4.79043e-08	3995	tags=43%, list=21%, signal=35%	301/5054/5919/3958/6288/3627/6280/7422/4323/972/7042/4192/3576/6279/6347/2207/11117/10451/7057/54209/728/3269/6352/5880/4267/80310/23075/3689/56833/7060/6373/11314/1843/5175/4283/84818/4067/196527/928/51192/1230/719/3554/9948/3672/199/683/5734/6364/3569/51135/4282/4856/5155/1441/2919/391/30817/6362/3557/6850/79647/3071/6223/7857/7409/83700/6283/84522/79902/5025/57580/5473/5293/6372/1525/5641/3552…
GO TERTIARY GRANULE	TERTIARY GRANULE	163	0.584959	2.03343	1.07442e-09	6.99088e-08	5.02688e-08	3672	tags=47%, list=19%, signal=38%	4057/3958/4318/7130/5806/5328/4069/965/2207/23601/22918/6556/2357/8673/1535/79792/1520/567/1471/8836/963/3689/84418/10312/3240/11314/3903/3043/5269/196527/6515/1536/1265/79930/25797/100049587/28956/4973/126014/1509/124583/53831/5547/2495/5236/374395/5777/1476/5912/2919/4893/5724/10288/1729/1315/8655/3417/3071/978/23218/23191/3684/945/3920/8987/3687/6813/8773/10159/5473/160364/387/966/3916/1604/23…
GO CYTOKINE SECRETION	CYTOKINE SECRETION	231	0.538219	1.94214	1.13648e-09	7.32492e-08	5.26707e-08	3128	tags=35%, list=16%, signal=30%	1116/301/10631/6288/2633/4192/2335/965/7114/23601/114769/9636/6284/3556/929/8840/79792/834/1992/8651/7291/5552/8764/10312/7097/2615/2597/84868/84818/4067/9590/29108/2213/284/8692/914/4843/64135/3937/3965/7128/10385/7096/29126/2149/199/11118/4860/5008/3661/83786/2150/7133/7855/5734/2268/11027/51043/4282/115362/3566/284297/307/10859/947/80149/7293/6850/247/3685/117854/7474/353514/7850/26253/51311/1…
GO AZUROPHIL GRANULE LUMEN	AZUROPHIL GRANULE LUMEN	91	0.680117	2.23619	1.15471e-09	7.37289e-08	5.30156e-08	3102	tags=48%, list=16%, signal=41%	2171/302/4069/6036/718/2519/2512/10577/12/3074/1075/8836/2990/2799/2717/2517/51816/9588/79980/2720/5476/29108/2896/23593/10487/10383/175/6037/25801/4125/8635/55313/6386/10493/51316/203068/410/4332/29952/3614/8804/2588/58485/5580
GO VIRAL LIFE CYCLE	VIRAL LIFE CYCLE	323	0.500067	1.84868	1.19396e-09	7.54315e-08	5.424e-08	2940	tags=29%, list=15%, signal=25%	4057/3956/5806/972/857/3576/10410/6347/3678/27350/5359/23601/684/9636/7153/3383/7852/4938/4599/8673/10581/858/6352/1948/7037/983/4939/3838/8764/4940/6510/6737/1969/5478/50848/60489/3688/1508/5819/6590/64782/998/3673/5034/8638/91543/85363/1803/8692/63901/3304/9582/8519/290/3428/3669/10542/55337/1956/200316/5479/3965/942/1234/55706/10465/920/79023/7314/3429/3693/27243/84875/3690/5817/10572/10475/69…
GO CHROMOSOME SEGREGATION	CHROMOSOME SEGREGATION	313	0.498537	1.83657	1.20346e-09	7.54315e-08	5.424e-08	2865	tags=29%, list=15%, signal=25%	991/84722/9232/332/891/55143/51203/7153/11004/24137/10783/9212/9787/81610/2669/10460/55355/10403/4751/64151/699/10051/83540/9055/3833/5347/1894/9493/1843/23397/220134/1063/64105/11339/221150/990/998/701/9319/7272/79980/387103/157313/4085/29127/81930/113130/55706/116028/10609/55839/79023/151648/151246/54820/79998/9700/84191/1062/7283/11130/10096/10459/27243/10615/4288/9928/81620/2177/84944/672/110…
GO REGULATION OF INFLAMMATORY RESPONSE	REGULATION OF INFLAMMATORY RESPONSE	333	0.491161	1.8209	1.27849e-09	7.88513e-08	5.66989e-08	3745	tags=35%, list=20%, signal=28%	301/5054/9021/6288/4318/6280/7130/5320/4192/9180/6279/7114/7132/2207/718/7791/55872/4615/8840/5176/8673/54209/837/834/6352/1075/1051/56833/1268/7097/11221/3606/2876/134/3673/84818/4258/4067/29108/63940/2213/8692/2896/64332/64581/4843/8530/54/1956/3554/284207/3133/8717/7128/5788/1050/22904/5008/8877/3559/683/284467/3661/89790/330/3082/3055/79626/340061/1003/7133/5734/3569/4856/115362/2177/5692/112…
GO MULTI MULTICELLULAR ORGANISM PROCESS	MULTI MULTICELLULAR ORGANISM PROCESS	229	0.537817	1.94183	1.2811e-09	7.88513e-08	5.66989e-08	2635	tags=26%, list=14%, signal=23%	7076/3485/6696/4318/133/3488/10135/3678/3976/3490/285/7005/8061/2192/3675/4313/85360/6781/3074/397/2706/1268/3726/1508/5021/5764/81671/3077/84868/2353/7026/7056/3673/811/3020/4316/29842/3134/2013/3133/3965/406/23764/1829/7048/5066/10959/4838/285590/1594/7043/5744/23780/1307/5724/367/2683/5743/2697/7319
GO LEARNING	LEARNING	145	-0.567543	-2.13603	1.47522e-09	8.99882e-08	6.47071e-08	2435	tags=43%, list=13%, signal=38%	2915/23259/2055/84446/5649/5153/2534/10716/4761/5071/2903/54413/4212/8867/6900/8997/590/3815/9369/84687/25769/8831/2258/85358/3156/1742/2558/84896/4763/7349/10522/477/338811/9162/5532/65009/81832/885/4900/57468/22986/50944/22941/6547/4130/1141/57144/9379/6529/577/10882/23542/41/6543/6616/26047/9378/10396/4915/2902/84502/57338/7143
GO MONOVALENT INORGANIC CATION TRANSMEMBRANE TRANSPORTER ACTIVITY	MONOVALENT INORGANIC CATION TRANSMEMBRANE TRANSPORTER ACTIVITY	379	-0.437321	-1.79097	1.50627e-09	9.10696e-08	6.54847e-08	1884	tags=23%, list=10%, signal=22%	6560/40/528/3776/523/27012/3786/55117/486/6550/54207/3748/3756/27109/115584/57582/1355/343450/10089/23416/348980/84679/6534/8911/140679/8912/25769/535/9990/123041/9962/3775/8514/7881/6339/57282/57657/10479/8671/9311/6334/3746/114134/477/56660/6326/3747/3761/3760/56479/131096/6511/610/6323/2900/388662/3780/57468/57419/3781/6327/3766/6547/6506/81539/6565/6529/259232/3751/57030/6505/2898/3777/6328/3…
GO POSITIVE REGULATION OF CELL CELL ADHESION	POSITIVE REGULATION OF CELL CELL ADHESION	254	0.516646	1.88208	1.52368e-09	9.13138e-08	6.56602e-08	2593	tags=31%, list=14%, signal=27%	3485/10630/301/3956/3115/3113/972/960/4192/857/6347/3109/3383/80381/6352/1948/8651/7037/3689/80380/8764/50848/11221/54440/861/3606/8728/10673/84868/998/4067/29108/3037/1803/1947/64332/3133/3280/3965/10385/942/29126/199/5788/920/3481/10272/4860/3559/10370/7048/2737/4838/864/5777/3676/3569/11006/916/51043/10211/3566/8915/2319/8772/3718/10859/5724/10288/7412/865/7784/6850/5420/3071/7474/11151/3575
GO POSITIVE REGULATION OF LEUKOCYTE PROLIFERATION	POSITIVE REGULATION OF LEUKOCYTE PROLIFERATION	136	0.613985	2.09836	1.57766e-09	9.36596e-08	6.73471e-08	2680	tags=38%, list=14%, signal=33%	3485/301/3115/3113/972/684/23529/3109/10451/80381/6352/1026/7037/80380/54440/3606/1880/10673/84868/4067/29108/1947/958/3133/3280/3965/942/29126/199/5788/920/3481/4860/3559/683/7048/8660/3569/916/4282/51293/8772/3718/10288/7412/7784/7293/6850/3071/11151/4773/970
GO FEMALE PREGNANCY	FEMALE PREGNANCY	189	0.556852	1.96818	1.59024e-09	9.36596e-08	6.73471e-08	1734	tags=23%, list=9%, signal=21%	7076/3485/6696/4318/133/3488/10135/3678/3976/3490/285/7005/8061/2192/3675/4313/85360/6781/397/2706/1268/3726/1508/5021/5764/81671/3077/84868/2353/7026/7056/3673/811/3020/4316/29842/2013/3965/1829/7048/5066/10959/4838/1594
GO COLLAGEN TRIMER	COLLAGEN TRIMER	87	0.683074	2.21891	1.60765e-09	9.3876e-08	6.75027e-08	2242	tags=41%, list=12%, signal=37%	1282/1281/1292/1284/1277/1278/1290/4015/4060/115908/4481/1289/1295/11117/84034/713/712/714/1299/1634/1291/1293/1296/114897/50509/81035/169044/80781/8685/1306/7373/1303/114904/129080/114898/1307
GO RESPONSE TO TYPE I INTERFERON	RESPONSE TO TYPE I INTERFERON	95	0.664592	2.19125	1.65348e-09	9.57336e-08	6.88384e-08	3660	tags=49%, list=19%, signal=40%	10410/2537/684/9636/2634/4938/4615/1958/4599/10581/5696/4939/4940/6672/3659/6772/3430/3665/8638/91543/8519/3669/55337/3134/3133/54739/3661/3429/79594/5777/4600/9641/84166/8772/81844/11274/117854/7474/51441/25939/3663/3660/6773/5771/26065/3455/5770
GO NEUROTRANSMITTER RECEPTOR ACTIVITY INVOLVED IN REGULATION OF POSTSYNAPTIC MEMBRANE POTENTIAL	NEUROTRANSMITTER RECEPTOR ACTIVITY INVOLVED IN REGULATION OF POSTSYNAPTIC MEMBRANE POTENTIAL	56	-0.735035	-2.3997	1.73121e-09	9.93919e-08	7.14689e-08	1613	tags=46%, list=8%, signal=43%	2904/2560/2743/2558/2561/2905/2900/2554/2895/2892/1141/1137/2894/116443/2890/1128/2898/2566/2565/2563/2556/2562/2893/2891/2902/2550
GO T CELL PROLIFERATION	T CELL PROLIFERATION	185	0.566181	2	1.74813e-09	9.9527e-08	7.15661e-08	2582	tags=35%, list=13%, signal=31%	3485/301/3958/4478/5320/10457/3115/3113/2302/977/3109/6385/6556/80381/11326/6352/5880/7037/57045/80380/1051/8764/2615/3659/54440/3606/10673/84868/836/29108/2000/1947/581/3133/3280/3965/10385/942/29126/199/5788/920/3481/4860/3559/7048/5777/7133/2064/3569/916/51043/2281/8772/3718/23385/10859/10288/4004/7412/7784/7293/6850/3071/11151
GO BASEMENT MEMBRANE	BASEMENT MEMBRANE	94	0.662573	2.18062	1.83915e-09	1.03844e-07	7.467e-08	1444	tags=38%, list=8%, signal=36%	7076/1282/302/1284/30008/3371/2335/255743/7045/3915/1289/3912/1295/977/4017/4016/2192/64856/5176/283/3339/3908/55214/7060/5764/1296/3913/9510/3910/10319/4811/341640/4147/80781/22795/1306
GO TUMOR NECROSIS FACTOR SUPERFAMILY CYTOKINE PRODUCTION	TUMOR NECROSIS FACTOR SUPERFAMILY CYTOKINE PRODUCTION	154	0.588149	2.03871	1.9729e-09	1.10483e-07	7.94439e-08	3805	tags=44%, list=20%, signal=36%	4057/10457/3315/2207/23643/7057/7305/929/54209/706/7538/1535/602/7291/10417/7097/54440/84868/9590/29108/54206/284/1191/914/1536/64581/54/64135/3133/3965/7128/942/7096/29126/5788/8737/5777/83786/7855/11027/4282/8915/8772/10859/947/5724/55829/80149/6850/4776/7474/353514/7098/50856/9261/945/113277/3586/10392/23586/9466/26191/120892/6693/384/948/2950/2621
GO NEGATIVE REGULATION OF CYTOKINE PRODUCTION	NEGATIVE REGULATION OF CYTOKINE PRODUCTION	268	0.524664	1.92059	1.99047e-09	1.1056e-07	7.94997e-08	3360	tags=35%, list=18%, signal=29%	301/4057/10457/2633/7042/2335/7114/3162/2302/684/114769/9636/6556/7057/7305/11326/54209/706/7538/602/1992/84282/7291/5552/57045/80380/9111/1969/2615/51191/3077/84868/29108/7040/2213/54206/284/5971/54/3134/64135/2260/3965/7128/10385/29126/5788/28951/51176/3661/3082/79594/5777/2150/79132/5734/7043/3569/9641/84166/284297/3718/307/10859/947/55829/80149/7293/695/3071/353514/10293/51564/7850/215/50856/…
GO MITOTIC SISTER CHROMATID SEGREGATION	MITOTIC SISTER CHROMATID SEGREGATION	150	0.588687	2.03499	2.37037e-09	1.30416e-07	9.3777e-08	2865	tags=37%, list=15%, signal=32%	991/84722/9232/891/55143/51203/11004/24137/10783/9212/9787/10460/10403/4751/64151/699/10051/83540/9055/3833/5347/9493/1843/23397/1063/64105/990/701/9319/7272/79980/4085/29127/81930/113130/151648/79998/9700/1062/7283/11130/10459/27243/10615/9928/81620/91272/51529/79075/26271/5901/83903/146909/286053/23636/90417
GO REGULATION OF SYMBIOSIS ENCOMPASSING MUTUALISM THROUGH PARASITISM	REGULATION OF SYMBIOSIS ENCOMPASSING MUTUALISM THROUGH PARASITISM	218	0.541271	1.94132	2.38612e-09	1.30416e-07	9.3777e-08	2547	tags=31%, list=13%, signal=27%	4057/302/3956/5806/972/857/3576/10410/27350/5359/684/2519/9636/7153/7852/4938/4599/10581/858/7538/6352/4939/3838/5441/4940/6737/5478/60489/3725/6772/5819/6590/2597/64782/5034/8638/91543/85363/3065/63901/9582/8519/3428/3669/55337/29969/200316/5479/3965/10465/920/51176/3429/5438/2150/5978/27243/5439/84875/9830/10475/6993/80149/140564/8724/3685/117854
GO INTERFERON GAMMA MEDIATED SIGNALING PATHWAY	INTERFERON GAMMA MEDIATED SIGNALING PATHWAY	85	0.681305	2.20374	2.61596e-09	1.41843e-07	1.01994e-07	2431	tags=51%, list=13%, signal=44%	9021/3122/3123/3115/3113/2633/960/3117/3127/3119/3118/2634/3383/4938/567/8651/4939/3460/83666/9111/4940/6737/4502/6672/3659/10346/3120/6772/3665/8638/2209/85363/3134/3133/817/4261/3661/3055/54625/84166/10475/5724/7412
GO ADULT BEHAVIOR	ADULT BEHAVIOR	142	-0.56955	-2.1272	2.68389e-09	1.4438e-07	1.03818e-07	2496	tags=37%, list=13%, signal=33%	80243/2906/26058/1393/2055/1267/5465/5071/27253/54413/1949/114781/5048/2668/6900/8997/9369/22876/57731/7248/2743/6622/5413/85358/4852/477/51286/64854/3356/6323/26050/18/55636/50944/3766/22941/6506/124925/1141/1137/9379/53616/28996/2257/57578/6623/114798/26047/9378/2566/6712/2902/23544
GO INTEGRIN BINDING	INTEGRIN BINDING	135	0.606312	2.07133	2.73536e-09	1.46e-07	1.04983e-07	2507	tags=42%, list=13%, signal=37%	1281/6696/10457/4323/2335/87/255743/7045/3381/3678/1289/3912/977/11117/10516/3491/11082/9636/7057/3383/3675/1903/1842/8840/3691/7450/3689/50848/7060/3688/5764/3913/1490/3673/5034/3936/83706/8754/811/4067/928/81/1956/2013/3696/3481/3693/7106/3964/4856/3690/4627/1307/10518/7412/6850/3685
GO LOCOMOTORY BEHAVIOR	LOCOMOTORY BEHAVIOR	196	-0.518071	-2.00144	2.81654e-09	1.49168e-07	1.07261e-07	2523	tags=35%, list=13%, signal=31%	3358/80243/2906/25946/26058/2915/23259/2055/5153/9099/1267/5071/9112/1949/114781/5048/4857/2668/2911/6900/8997/22876/321/10499/57731/55084/460/7248/2743/114/320/6622/55079/20/57282/774/1742/347730/348/477/51286/23284/5532/4644/6323/18/5581/57555/55636/2571/257194/3766/124925/1141/57144/1137/111/53616/2775/28996/10882/3751/2257/1826/6623/6616/2902/23544/7143
GO REGULATION OF SYNAPTIC VESICLE EXOCYTOSIS	REGULATION OF SYNAPTIC VESICLE EXOCYTOSIS	78	-0.669754	-2.29655	2.92084e-09	1.53501e-07	1.10377e-07	2302	tags=53%, list=12%, signal=46%	2932/783/148/84961/9515/23413/22871/28964/5217/6804/140730/321/6843/9066/8573/143425/320/22999/5413/8499/9162/3356/9783/112476/63908/5582/5864/9699/10675/6857/6812/1141/1137/116443/5579/6855/6860/6853/112755/10815/10814
GO RESPONSE TO OXYGEN LEVELS	RESPONSE TO OXYGEN LEVELS	376	0.467804	1.74305	3.07926e-09	1.60592e-07	1.15476e-07	2544	tags=28%, list=13%, signal=25%	10631/1277/5327/358/133/9124/10135/7422/5328/114990/4323/3939/7042/857/6649/891/768/3162/285/4017/29923/114769/7057/3383/7852/890/1958/4504/4313/283/6781/5352/1535/10449/1026/5696/51129/5698/355/5351/7291/57085/51142/1263/7351/7097/4000/5021/5764/5230/205/3099/1490/836/134/1019/3673/5034/5714/7200/57103/1803/6285/1869/1536/81/4843/5701/1902/84709/5165/4193/2030/2023/50507/6548/5315/26608/5688/103…
GO SYNAPTIC TRANSMISSION GLUTAMATERGIC	SYNAPTIC TRANSMISSION GLUTAMATERGIC	103	-0.619525	-2.21202	3.12005e-09	1.61486e-07	1.16119e-07	2049	tags=42%, list=11%, signal=37%	5071/5270/2903/54413/22871/2911/53358/440279/2904/246213/85358/84896/4763/7349/2913/477/8398/2905/9162/3356/2900/63908/57555/50944/2895/2892/22941/6857/6812/2894/116443/2890/6509/57030/2898/23542/9378/23025/4983/2893/2891/2902/7143
GO TRANSMITTER GATED CHANNEL ACTIVITY	TRANSMITTER GATED CHANNEL ACTIVITY	60	-0.720277	-2.36743	3.52329e-09	1.80986e-07	1.3014e-07	1613	tags=42%, list=8%, signal=38%	2904/2560/2743/2558/2561/2905/2900/8001/2554/2895/2892/1141/1137/2894/116443/2890/2898/2566/2565/2563/2556/2562/2893/2891/2902
GO PATTERN RECOGNITION RECEPTOR SIGNALING PATHWAY	PATTERN RECOGNITION RECEPTOR SIGNALING PATHWAY	196	0.555692	1.97253	3.56523e-09	1.81773e-07	1.30706e-07	3835	tags=40%, list=20%, signal=32%	4057/6280/857/6279/23643/4615/929/1513/1535/1520/81622/3689/7097/3659/1508/11314/23180/84868/1514/3665/4067/91543/81035/85363/64581/3304/338382/3656/8685/64135/92610/7128/7096/841/146722/7314/3661/330/340061/8737/2150/79132/388325/7867/11027/51135/7105/10211/9641/8915/8772/7184/695/4214/7098/26253/3684/9261/8780/118788/51311/80216/6197/55601/10010/10318/10392/23586/26191/51284/26065/5641/7316/330…
GO PLATELET ALPHA GRANULE	PLATELET ALPHA GRANULE	90	0.667521	2.19402	3.64e-09	1.84211e-07	1.32459e-07	2058	tags=40%, list=11%, signal=36%	7076/5054/710/7422/7042/2335/87/5265/7114/5154/2162/7057/5104/12/5627/7450/5552/3671/5175/1675/51706/10184/83706/135228/7040/1191/928/81/2/7044/3481/3082/22915/7043/5155/3690
GO ENZYME INHIBITOR ACTIVITY	ENZYME INHIBITOR ACTIVITY	370	0.477423	1.77857	3.72271e-09	1.87011e-07	1.34473e-07	2253	tags=21%, list=12%, signal=19%	7076/301/4057/5054/302/3958/710/9021/871/3315/1031/9232/5265/5266/332/5570/308/6588/646424/684/390940/718/114769/8826/5104/10253/10788/5176/4504/12/5627/1800/56925/1026/1471/1992/8651/51129/286204/1475/83666/5918/9535/1293/5764/200734/6590/5271/2597/836/6195/7453/135228/5269/7035/151636/8692/831/344/2/8530/57761/221908/161742/28951/51176/330/10406/4946/151242/341/1476/221476/7980/5973/10221/85450…
GO ANTIGEN PROCESSING AND PRESENTATION OF PEPTIDE ANTIGEN	ANTIGEN PROCESSING AND PRESENTATION OF PEPTIDE ANTIGEN	187	0.562555	1.99179	4.29918e-09	2.13101e-07	1.53233e-07	3836	tags=51%, list=20%, signal=41%	3122/3123/3115/3113/972/3117/3127/3119/2207/3108/3111/3118/3109/11004/6556/24137/8673/54209/1535/1520/567/5696/5698/1175/3120/9493/9871/829/3077/6890/2217/8905/1514/811/5714/2209/29108/2213/2923/3140/1536/4688/29127/5701/1636/3134/100507436/3133/81930/4689/1509/653361/830/5688/5721/9341/4277/3693/55080/5704/9554/1062/5686/56992/83547/10134/5692/5711/5691/8655/3685/563/5682/5683/5690/50856/3832/11…
GO ENDOPEPTIDASE REGULATOR ACTIVITY	ENDOPEPTIDASE REGULATOR ACTIVITY	181	0.560514	1.97642	4.30443e-09	2.13101e-07	1.53233e-07	2234	tags=24%, list=12%, signal=22%	7076/4057/5054/710/871/9232/5265/5266/332/646424/684/718/114769/5104/5176/4504/12/5627/1800/56925/1471/1992/286204/1475/5918/1293/6590/5271/2597/6195/135228/5269/7035/831/2/8530/51176/5721/330/10406/1476/7980/5973/8996
GO NEGATIVE REGULATION OF IMMUNE RESPONSE	NEGATIVE REGULATION OF IMMUNE RESPONSE	148	0.592025	2.04349	4.52825e-09	2.22568e-07	1.6004e-07	3014	tags=38%, list=16%, signal=32%	301/1281/3958/710/3598/7042/3162/2302/684/11326/9111/56833/8764/10875/11221/11314/3077/84868/2876/84695/4067/7040/2213/284/2896/2/3428/3134/100507436/3133/3965/7128/5788/3559/64092/79594/5777/79132/7043/54625/51043/84166/3566/3718/10859/5692/55829/80149/6778/5682/3575/6223/51441/25939/3635/3142
GO POTASSIUM ION TRANSPORT	POTASSIUM ION TRANSPORT	235	-0.489571	-1.91259	5.06844e-09	2.4734e-07	1.77853e-07	3387	tags=38%, list=18%, signal=32%	3778/4905/9312/27345/3788/150/90134/3773/388591/65267/3768/88/1027/54800/5728/3736/9722/3737/84286/776/287/6560/3776/27012/3786/486/6550/65125/54207/7432/3748/3756/1908/57582/11060/343450/10089/23416/348980/84679/10142/274/1804/25769/3799/5999/9990/7248/123041/288/3775/8514/7881/57657/10479/3746/477/56660/6844/3747/3761/3760/64805/3356/56479/81832/131096/610/3780/57468/57419/3781/65268/3766/9472/…
GO REGULATION OF SYNAPSE STRUCTURE OR ACTIVITY	REGULATION OF SYNAPSE STRUCTURE OR ACTIVITY	231	-0.492617	-1.92596	5.19262e-09	2.51602e-07	1.80918e-07	3109	tags=42%, list=16%, signal=36%	5747/1006/9746/266727/29882/25/1627/57084/5728/4976/57497/1399/1496/139065/40/5649/2534/6792/58504/10152/4761/115703/1639/54413/9758/7074/153090/5048/1759/4916/22871/8997/389941/2904/11141/6453/388336/56850/10507/7804/25791/8831/246213/5802/6622/85358/9148/84631/55638/10611/9762/347730/145581/348/147381/80725/2823/23284/9912/64218/26045/22859/55607/26050/91752/9231/57555/5789/2895/654429/1607/576…
GO POSITIVE REGULATION OF LEUKOCYTE CELL CELL ADHESION	POSITIVE REGULATION OF LEUKOCYTE CELL CELL ADHESION	214	0.534938	1.91679	5.7535e-09	2.76816e-07	1.99048e-07	2593	tags=32%, list=14%, signal=28%	3485/301/3956/3115/3113/972/960/4192/857/6347/3109/3383/80381/6352/1948/8651/7037/3689/80380/8764/11221/54440/861/3606/10673/84868/998/4067/29108/3037/1803/1947/64332/3133/3280/3965/10385/942/29126/199/5788/920/3481/4860/3559/7048/2737/864/5777/3676/3569/11006/916/51043/3566/8915/2319/8772/3718/10859/5724/10288/7412/865/7784/6850/3071/11151/3575
GO INTRINSIC COMPONENT OF POSTSYNAPTIC SPECIALIZATION MEMBRANE	INTRINSIC COMPONENT OF POSTSYNAPTIC SPECIALIZATION MEMBRANE	77	-0.668384	-2.28651	5.82869e-09	2.78473e-07	2.00239e-07	2711	tags=56%, list=14%, signal=48%	3361/57497/25945/2557/729993/1630/2903/1949/22871/388336/5802/59284/2558/347730/145581/2561/401190/9127/81832/26045/57689/10368/2066/2554/57555/22986/2895/64084/1008/347731/1141/27092/2894/64101/2890/1128/53616/3751/114798/10369/2556/729956/2902
GO COLLAGEN BINDING	COLLAGEN BINDING	69	0.705758	2.22478	6.04125e-09	2.86624e-07	2.061e-07	2047	tags=54%, list=11%, signal=48%	165/1292/4318/871/5118/960/2335/4015/7045/4060/9902/5154/7057/3675/1842/1513/1634/1520/7450/1291/3688/1508/114897/50509/1514/3673/4811/8754/64175/54829/22795/5479/3672/7373/4921/26577/5155
GO CYTOKINE METABOLIC PROCESS	CYTOKINE METABOLIC PROCESS	114	0.634657	2.14829	6.44121e-09	3.03492e-07	2.1823e-07	3596	tags=46%, list=19%, signal=37%	3315/972/3162/2302/10644/3556/7057/7305/1958/80381/7538/602/9111/1051/3659/5606/3606/3665/10643/9590/54206/1536/64581/942/7096/5788/920/28951/3661/3569/916/8915/6774/10859/5724/6850/7474/7098/9261/51311/1054/5125/3635/79589/3586/5074/4790/10392/51284/3552/3553/6693
GO SPECIFIC GRANULE	SPECIFIC GRANULE	159	0.57663	2.00613	7.01221e-09	3.28133e-07	2.35948e-07	3466	tags=41%, list=18%, signal=34%	1116/4057/5806/5328/4069/64114/23601/5329/22918/8673/1535/79792/567/1522/8836/963/3689/3240/6590/3903/196527/6515/54918/1536/1265/25797/719/5873/28956/4973/126014/1509/124583/53831/84329/683/6809/10555/5777/7133/3728/5912/2919/3683/10970/4758/221/6518/3685/23071/8560/7414/5906/23191/3684/121260/945/1774/64386/6813/8773/4790/160364/56729/966
GO REGULATION OF LEUKOCYTE MIGRATION	REGULATION OF LEUKOCYTE MIGRATION	193	0.549417	1.94588	7.18069e-09	3.33731e-07	2.39973e-07	2581	tags=32%, list=13%, signal=28%	301/5054/5919/3958/3627/4478/7422/4323/972/4192/3576/9547/6347/3162/11117/7057/3383/54209/728/6352/5880/4267/80310/23075/56833/8764/7060/83483/5764/11314/1843/3204/134/3673/811/4067/196527/29108/63940/928/1893/1230/719/3554/3965/199/683/2150/3676/5734/6364/3569/4282/4856/391/80024/8772/5724/7784/79647/3071/7474
GO NEGATIVE REGULATION OF LEUKOCYTE CELL CELL ADHESION	NEGATIVE REGULATION OF LEUKOCYTE CELL CELL ADHESION	122	0.611372	2.08239	7.60464e-09	3.51047e-07	2.52424e-07	2433	tags=34%, list=13%, signal=30%	301/3958/5320/10457/972/4192/2302/6385/11326/8651/57045/80380/1051/8764/10875/2615/3659/861/11314/3077/84868/836/84695/445/2213/3965/10385/942/29126/3559/2737/79626/864/5777/2064/51043/3566/3718/10859/10288/80149/865
GO NEURON PROJECTION MEMBRANE	NEURON PROJECTION MEMBRANE	59	-0.711926	-2.32997	9.09012e-09	4.16803e-07	2.99707e-07	2475	tags=51%, list=13%, signal=44%	2557/9495/729993/6711/4355/3748/388336/3208/84687/5064/23136/23710/286/2558/3746/3747/2554/6506/2890/23109/84059/4137/26047/2566/2565/90249/3745/3767/2556/729956
GO POSITIVE REGULATION OF CELL ADHESION	POSITIVE REGULATION OF CELL ADHESION	395	0.466903	1.75009	1.00692e-08	4.58616e-07	3.29774e-07	2730	tags=31%, list=14%, signal=27%	3485/10630/301/6288/3956/7422/3115/3113/972/960/7042/6281/4192/857/2335/255743/3381/6347/3678/1295/11117/3491/3109/10451/6385/8826/2316/3383/3675/1842/80381/6352/1948/8651/7037/3689/80380/8764/50848/5764/11221/54440/861/3606/8728/10673/84868/91663/998/8829/3673/29984/4811/8754/811/4067/29108/3037/1803/284/1947/64332/2013/3133/3280/3965/10385/942/29126/199/5788/920/1021/3481/10272/4860/3559/10370/…
GO COAGULATION	COAGULATION	338	0.476469	1.76871	1.16242e-08	5.25937e-07	3.78182e-07	2359	tags=24%, list=12%, signal=21%	10630/5054/302/1281/1277/1192/710/6288/1278/5327/5328/3315/857/2152/10627/5265/308/5154/5359/2207/2162/5329/10451/30846/2316/7057/5104/2192/10398/5627/7450/8323/10544/50848/3659/79001/829/114897/3043/998/7056/3673/5028/83706/4067/7035/196527/3020/3065/1465/958/928/5341/60/2/2151/5873/3937/23764/2149/830/5547/29071/5777/84959/2150/22915/8353/3569/5912/71/5155/3690/7980/10019/4627/954/2769/8357/947…
GO NEGATIVE REGULATION OF PROTEOLYSIS	NEGATIVE REGULATION OF PROTEOLYSIS	342	0.483307	1.79552	1.19918e-08	5.38998e-07	3.87573e-07	2725	tags=23%, list=14%, signal=20%	7076/4057/5054/710/4318/5327/358/871/7422/960/9232/5265/5266/332/2537/646424/684/4804/5329/718/55872/114769/7057/5104/5176/4504/12/5627/1800/56925/1471/1992/1522/83596/286204/1475/5918/6737/1293/6590/3077/5271/2597/2876/6195/135228/5269/7035/2619/831/1893/2/3428/10542/8530/4193/51499/51176/330/3082/10406/10956/1942/1476/221476/9528/7980/6386/5973/8996/79094/2810/91319/25816/5743/2719/6201/6692/78…
GO DICARBOXYLIC ACID TRANSPORT	DICARBOXYLIC ACID TRANSPORT	94	-0.624627	-2.22097	1.21402e-08	5.42102e-07	3.89805e-07	1297	tags=31%, list=7%, signal=29%	246213/320/22999/6622/4763/8499/8541/477/6844/83733/885/6511/5027/18/56262/5864/3766/6857/6812/6506/9356/6860/57030/6505/9256/11255/6616/4915/10815
GO ANAPHASE PROMOTING COMPLEX DEPENDENT CATABOLIC PROCESS	ANAPHASE PROMOTING COMPLEX DEPENDENT CATABOLIC PROCESS	81	0.670901	2.15927	1.2342e-08	5.47538e-07	3.93714e-07	4295	tags=57%, list=22%, signal=44%	991/11065/9232/891/27338/1017/9212/6790/5696/983/5698/5347/701/5714/4085/84417/5701/5688/5721/7314/5704/5686/5692/5711/5691/51529/5682/26271/5683/5690/5689/5720/246184/5700/10213/5699/5718/7316/5684/7311/10393/5719/5685/5715/51434/5708
GO SECRETORY GRANULE MEMBRANE	SECRETORY GRANULE MEMBRANE	293	0.494176	1.81395	1.26389e-08	5.57088e-07	4.00581e-07	3186	tags=38%, list=17%, signal=32%	2171/3958/26002/5328/960/857/965/64114/2207/23601/976/2212/684/5329/22918/967/8826/6556/5104/7305/10788/929/2357/8673/728/858/1535/963/3689/11010/84418/10312/7097/1650/11314/5175/3903/51706/27180/10184/135228/5269/196527/6515/54918/928/1536/290/79930/5908/84061/719/5873/100049587/28956/4973/25798/5788/53831/84329/9545/683/5066/10959/6809/340061/10555/5547/4257/374395/7133/150372/5912/6836/3690/48…
GO NEUROTRANSMITTER RECEPTOR COMPLEX	NEUROTRANSMITTER RECEPTOR COMPLEX	53	-0.730576	-2.36115	1.43571e-08	6.26777e-07	4.50692e-07	2477	tags=62%, list=13%, signal=54%	2906/729993/402117/375567/2903/118427/22871/2904/388336/59284/85358/1741/59283/55227/1742/57406/2905/10368/2900/1740/50944/2895/2892/22941/27092/116443/2890/2898/10369/729956/2893/2891/2902
GO CELLULAR RESPONSE TO BIOTIC STIMULUS	CELLULAR RESPONSE TO BIOTIC STIMULUS	236	0.520216	1.88145	1.44034e-08	6.26777e-07	4.50692e-07	3431	tags=36%, list=18%, signal=30%	4057/5054/7431/3627/3576/6347/23643/114769/3383/4615/929/57817/54209/706/7538/834/6352/10417/80380/1051/3148/7097/6373/9516/3606/84868/4283/1649/1019/445/8754/4067/7035/3309/85363/29108/57103/7040/2213/958/64581/4843/3656/9450/7128/942/1234/7096/29126/22904/3661/129607/3055/7133/7855/388325/3569/11027/10269/4282/2919/8915/10221/4793/10859/5724/10288/55829/80149/3557/6850/695/7474/146956/4064/5449…
GO NEURON SPINE	NEURON SPINE	170	-0.515933	-1.96385	1.59866e-08	6.9127e-07	4.97066e-07	2226	tags=39%, list=12%, signal=35%	80315/9513/9572/10152/115703/2903/4355/9758/7074/1759/29/22871/6453/321/22895/5530/3208/84687/4628/320/85358/10479/9148/55619/1742/322/2913/477/2823/9912/56899/9162/9127/9743/55607/408/112476/91752/4900/3780/26232/50944/1410/2895/3781/613/22941/6547/124925/64101/2890/3751/815/83992/9026/575/4137/6543/26052/8851/4915/4983/2893/2891/5662/2902
GO DENDRITE MORPHOGENESIS	DENDRITE MORPHOGENESIS	143	-0.552019	-2.07599	1.64134e-08	7.05262e-07	5.07127e-07	3048	tags=50%, list=16%, signal=42%	4891/473/29882/9201/1627/1952/5728/4976/79791/10084/1496/80243/23098/50488/9344/2932/5649/2534/6792/10152/115703/23543/54413/26039/7074/57520/5048/22871/22891/8997/11141/57498/22906/10507/23043/1501/7804/3397/25791/5530/9693/85358/26012/23072/55619/1742/10611/9762/10006/80725/9912/85442/55607/26050/221692/50944/5789/4038/22941/5063/1141/577/5911/4133/23542/1826/23316/26052/8851/2047/2902
GO NEUTROPHIL MIGRATION	NEUTROPHIL MIGRATION	116	0.606992	2.05259	1.73214e-08	7.39623e-07	5.31835e-07	4051	tags=47%, list=21%, signal=38%	3958/6288/3627/6280/972/7042/4192/3576/6279/6347/2207/10451/728/6352/5880/4267/3689/56833/7060/6373/5175/4283/51192/719/3554/9948/3672/683/6364/51135/1441/2919/391/6362/3557/6850/3071/7409/83700/6283/84522/57580/5473/5293/6372/1525/3552/3553/708/6354/5294/5879/3579/6355/8291
GO NUCLEAR CHROMOSOME SEGREGATION	NUCLEAR CHROMOSOME SEGREGATION	254	0.501829	1.82811	1.84245e-08	7.79e-07	5.60149e-07	3842	tags=35%, list=20%, signal=28%	991/84722/9232/891/55143/51203/7153/11004/24137/10783/9212/9787/81610/2669/10460/10403/4751/64151/699/10051/83540/9055/3833/5347/1894/9493/1843/23397/1063/64105/990/998/701/9319/7272/79980/4085/29127/81930/113130/55706/116028/10609/151648/151246/79998/9700/1062/7283/11130/10096/10459/27243/10615/9928/81620/2177/84944/378708/157570/91272/51529/79075/26271/5901/146956/83903/146909/286053/57082/898/…
GO REGULATION OF VIRAL LIFE CYCLE	REGULATION OF VIRAL LIFE CYCLE	143	0.581455	1.99918	1.84716e-08	7.79e-07	5.60149e-07	2547	tags=34%, list=13%, signal=29%	4057/3956/5806/972/3576/10410/27350/5359/684/9636/7153/4938/4599/10581/858/6352/4939/3838/4940/6737/5478/60489/5819/6590/64782/5034/8638/91543/85363/63901/9582/8519/3428/3669/55337/200316/5479/3965/10465/920/3429/27243/84875/10475/80149/140564/8724/117854
GO POSITIVE REGULATION OF T CELL PROLIFERATION	POSITIVE REGULATION OF T CELL PROLIFERATION	94	0.641029	2.10972	1.89002e-08	7.92186e-07	5.69631e-07	2680	tags=40%, list=14%, signal=35%	3485/301/3115/3113/3109/80381/6352/7037/80380/54440/3606/10673/84868/29108/1947/3133/3280/3965/942/29126/199/5788/920/3481/4860/3559/7048/3569/916/8772/3718/10288/7412/7784/6850/3071/11151/970
GO MYELOID LEUKOCYTE DIFFERENTIATION	MYELOID LEUKOCYTE DIFFERENTIATION	204	0.536255	1.91564	1.98671e-08	8.27636e-07	5.95122e-07	2306	tags=33%, list=12%, signal=30%	4057/302/4318/7422/972/3976/2207/56975/760/7305/8840/54209/714/7037/29887/1051/1969/10312/3726/7097/3725/861/55509/6688/3059/1880/3204/2353/4055/998/3665/2124/135228/4067/7040/9398/5971/2242/7071/3428/1230/116071/1945/841/126014/920/1021/1050/22904/10272/51176/4831/10538/7048/4495/8544/8737/84959/2150/11006/28962/4627/6988/10221/8772/4830/169200/10859
GO PROTEIN LOCALIZATION TO SYNAPSE	PROTEIN LOCALIZATION TO SYNAPSE	82	-0.642265	-2.2406	2.13435e-08	8.83749e-07	6.3547e-07	3507	tags=65%, list=18%, signal=53%	27065/51104/80852/23513/1855/8417/9746/27445/1627/57554/7014/40/23096/5649/23426/2903/22871/10243/388336/56850/3799/59284/1741/59283/55227/1742/347730/2905/9912/56899/23162/5874/81832/5602/10368/5590/57555/1740/50944/3800/4130/8927/27092/9379/53616/3798/4137/6616/9378/112755/10369/10815/2902
GO ANTIGEN PROCESSING AND PRESENTATION OF EXOGENOUS PEPTIDE ANTIGEN VIA MHC CLASS I	ANTIGEN PROCESSING AND PRESENTATION OF EXOGENOUS PEPTIDE ANTIGEN VIA MHC CLASS I	75	0.679522	2.14159	2.27227e-08	9.3519e-07	6.7246e-07	4295	tags=65%, list=22%, signal=51%	2207/8673/1535/567/5696/5698/6890/811/5714/2209/2923/1536/4688/5701/3134/3133/4689/653361/5688/5721/9341/3693/5704/9554/5686/5692/5711/5691/3685/5682/5683/5690/50856/5689/10437/8773/5720/5700/10213/5699/6892/5718/5684/948/6891/5719/5685/5715/5708
GO POTASSIUM ION TRANSMEMBRANE TRANSPORTER ACTIVITY	POTASSIUM ION TRANSMEMBRANE TRANSPORTER ACTIVITY	159	-0.532654	-2.01518	2.31318e-08	9.46326e-07	6.80467e-07	3387	tags=39%, list=18%, signal=32%	3778/9312/27345/3788/90134/3773/2899/3768/3736/3737/84286/6560/3776/27012/3786/486/6550/54207/3748/3756/57582/343450/10089/23416/348980/84679/25769/9990/123041/3775/8514/7881/57657/10479/3746/477/56660/3747/3761/3760/56479/131096/610/2900/3780/57468/57419/3781/3766/3751/2898/3777/3782/3785/6616/6833/3745/3767/3765/478/30818/30819
GO COLLAGEN METABOLIC PROCESS	COLLAGEN METABOLIC PROCESS	105	0.634065	2.12689	2.39509e-08	9.74004e-07	7.0037e-07	1945	tags=41%, list=10%, signal=37%	7431/1277/4318/1278/871/4323/9902/1289/11117/4239/4313/1513/5352/1520/1471/5351/2022/55214/3688/1508/8985/4327/1490/1514/3673/64175/7040/57333/54206/4316/90993/9508/1306/2149/4261/1509/10609/5159/4320/140766/9697/7043/3569
GO MHC PROTEIN COMPLEX	MHC PROTEIN COMPLEX	19	0.90993	2.21587	2.41447e-08	9.76076e-07	7.01859e-07	1350	tags=89%, list=7%, signal=83%	3122/3123/3115/3113/972/3117/3127/3119/3108/3111/3118/3109/567/3120/3140/3134/3133
GO GLUTAMATE SECRETION	GLUTAMATE SECRETION	45	-0.752353	-2.34192	2.43276e-08	9.77683e-07	7.03015e-07	1599	tags=51%, list=8%, signal=47%	6804/320/22999/6622/4763/8499/8541/6844/885/6511/5027/5864/6857/6812/6506/6860/57030/6505/9256/11255/6616/4915/10815
GO CELL SUBSTRATE ADHESION	CELL SUBSTRATE ADHESION	341	0.473077	1.75795	2.51132e-08	1.00335e-06	7.21474e-07	2456	tags=29%, list=13%, signal=26%	10630/5054/51330/10631/1281/1277/3956/7422/5328/2633/4323/960/6281/4192/2335/87/255743/3915/3678/3912/285/7205/1295/11117/10516/7791/3491/3679/967/6385/8826/2316/7057/2192/3675/1842/3691/5880/182/7450/79778/3689/7041/8324/3688/5764/3913/5175/1490/50509/91663/3204/998/8829/3673/10319/29984/4811/83706/8754/811/3037/284/81/4059/22795/2013/3672/10395/9723/1021/6548/683/4739/9341/3987/3693/94/54749/19…
GO ACUTE INFLAMMATORY RESPONSE	ACUTE INFLAMMATORY RESPONSE	107	0.628609	2.11383	2.6326e-08	1.04569e-06	7.51919e-07	2699	tags=34%, list=14%, signal=29%	6288/9332/2152/2335/9180/5265/6279/5359/2207/718/3383/57817/12/54210/1051/1268/3240/3077/134/445/6289/196527/2213/3133/5008/5547/3569/6774/23780/55829/7412/7784/695/2683/5743/9536
GO SITE OF POLARIZED GROWTH	SITE OF POLARIZED GROWTH	181	-0.514311	-1.95955	2.77334e-08	1.09523e-06	7.87536e-07	2311	tags=37%, list=12%, signal=33%	22933/9344/23405/80315/9513/6792/65018/1809/7074/22853/5048/57698/323/118813/50861/22906/51199/25791/84687/26059/3799/4628/9479/7248/2258/56288/6622/1741/90060/5881/347730/322/10006/79784/116983/2823/23162/22902/10439/4644/22859/55607/114787/91752/5727/65078/4747/3800/22941/1996/81551/5818/29767/8941/11075/4133/5923/1826/10409/4137/6616/8851/3897/57447/140767/23046/55118
GO INTERLEUKIN 8 PRODUCTION	INTERLEUKIN 8 PRODUCTION	77	0.673036	2.14004	2.79133e-08	1.096e-06	7.8809e-07	3677	tags=53%, list=19%, signal=43%	1116/301/5054/972/965/7114/4615/929/602/7097/1649/29108/8692/914/64581/3304/4843/3965/7096/2149/5788/25865/8737/2150/11027/8915/284297/8772/307/6850/7474/7098/945/51311/3586/10392/23586/26191/51284/3553/3303
GO NEGATIVE REGULATION OF SYNAPTIC TRANSMISSION	NEGATIVE REGULATION OF SYNAPTIC TRANSMISSION	76	-0.651703	-2.23279	2.82898e-08	1.10443e-06	7.94155e-07	2049	tags=41%, list=11%, signal=37%	5071/27253/54413/590/25769/114/6622/85358/84896/4763/57406/8398/9162/3356/55607/22986/2895/22941/2770/6812/2890/56853/6529/6860/2898/952/41/4137/869/3745/7143
GO REGULATION OF ADAPTIVE IMMUNE RESPONSE	REGULATION OF ADAPTIVE IMMUNE RESPONSE	157	0.567597	1.97215	2.98725e-08	1.15959e-06	8.3382e-07	2593	tags=35%, list=14%, signal=31%	301/2207/2302/23529/718/6556/567/7037/8764/3659/11221/54440/5819/3077/3606/2217/10673/84868/84695/3665/962/91543/29108/7040/2213/958/64332/3554/3134/100507436/3133/7128/29126/5788/920/4277/64092/5777/7133/10459/7855/3569/51043/5817/3566/8772/54795/3718/10859/80149/7784/695/6778/563/3575
GO NEGATIVE REGULATION OF CELL CYCLE PHASE TRANSITION	NEGATIVE REGULATION OF CELL CYCLE PHASE TRANSITION	238	0.512782	1.85368	3.06306e-08	1.18231e-06	8.50151e-07	3720	tags=41%, list=19%, signal=34%	10457/1031/991/1647/6347/891/7465/1017/9212/1026/6790/5696/983/5698/5111/10403/25959/22809/699/1263/5347/51512/1843/1063/990/1019/701/9319/7272/5714/678/56241/51514/4998/144455/1869/4085/5701/581/995/10385/4193/4582/2146/641/1021/51499/1111/5688/5721/11200/8737/5704/10459/3276/5686/63967/81620/5311/672/835/5692/5711/5691/10106/79733/6118/3364/2810/51065/5682/26271/5683/5690/5933/10263/29980/1029/…
GO I KAPPAB KINASE NF KAPPAB SIGNALING	I KAPPAB KINASE NF KAPPAB SIGNALING	267	0.500476	1.83345	3.6312e-08	1.39373e-06	1.00218e-06	4521	tags=46%, list=24%, signal=35%	4057/6275/3956/3315/972/3162/7132/684/23643/114769/6284/2316/55504/4615/929/10783/389/834/602/6398/10549/84270/7097/10346/9516/1894/6772/4055/51246/85363/3065/29108/284/6285/958/5971/1893/3656/1902/8717/92610/3965/7128/8795/2280/841/2149/920/79971/124583/8743/7314/3661/330/6574/8737/79594/7188/2150/222068/60401/51135/84962/7105/4919/9641/8915/8772/10475/80149/3557/695/2697/8878/7474/7052/54469/70…
GO SISTER CHROMATID SEGREGATION	SISTER CHROMATID SEGREGATION	182	0.538382	1.8946	3.68363e-08	1.40595e-06	1.01097e-06	2865	tags=33%, list=15%, signal=28%	991/84722/9232/891/55143/51203/7153/11004/24137/10783/9212/9787/10460/10403/4751/64151/699/10051/83540/9055/3833/5347/9493/1843/23397/1063/64105/990/701/9319/7272/79980/4085/29127/81930/113130/116028/151648/151246/79998/9700/1062/7283/11130/10459/27243/10615/9928/81620/157570/91272/51529/79075/26271/5901/83903/146909/286053/23636/90417
GO POSITIVE REGULATION OF SYNAPTIC TRANSMISSION	POSITIVE REGULATION OF SYNAPTIC TRANSMISSION	163	-0.519808	-1.96527	4.03445e-08	1.5237e-06	1.09563e-06	2302	tags=38%, list=12%, signal=34%	2932/5649/65018/783/148/794/5270/2903/54413/4355/22871/11170/2904/6804/140730/10858/25769/3799/9066/5999/143425/114/22999/6622/22997/85358/1742/4763/347730/348/2905/6844/23373/81832/26045/9783/55607/5590/112476/18/4900/5581/57555/50944/9699/64084/22941/6547/6857/6812/1141/2898/6543/23316/6616/9378/112755/23025/4915/729956/2902/7143
GO FICOLIN 1 RICH GRANULE	FICOLIN 1 RICH GRANULE	124	0.600646	2.05201	4.03673e-08	1.5237e-06	1.09563e-06	4317	tags=53%, list=23%, signal=41%	4318/7130/5265/5836/3310/79792/1520/1471/10549/1522/2990/10875/5478/2799/9535/1508/240/1675/23406/3043/10092/2720/3304/3101/25797/5701/9961/55276/1509/124583/26578/5315/4860/4831/2821/2495/5236/1476/3728/5686/4282/6993/3417/4332/3614/7414/978/5683/2934/5689/823/80301/51411/2992/10213/5718/3303/2950/11333/5719/28988/226/847/10694/5708/10450
GO CELL KILLING	CELL KILLING	165	0.56381	1.96262	4.74374e-08	1.78073e-06	1.28045e-06	3669	tags=35%, list=19%, signal=29%	4057/4069/85236/718/3383/7305/57817/1075/3075/8542/5819/3077/2597/3606/2217/84868/5551/140823/2213/3151/64581/4843/8970/80328/5873/3134/2013/100507436/3133/5052/3965/5788/10383/79465/4277/10578/5777/2150/5817/8772/10859/203068/6850/563/11151/3575/6223/3684/7409/1054/6283/80329/6813/146850/6372/966/3916/1604
GO AGING	AGING	307	0.477832	1.76056	5.1248e-08	1.91326e-06	1.37575e-06	3183	tags=32%, list=17%, signal=27%	7076/3485/5054/1284/710/133/3488/10135/6648/7298/4017/3383/712/10783/5176/57817/9212/706/2305/1634/567/1075/1026/983/7291/597/83596/2022/3689/2706/1268/9104/4000/9516/3725/1490/1728/2353/445/5028/811/140823/8692/4316/29842/84417/6185/3014/6909/8438/406/2730/1021/50507/26272/3159/55170/1111/7048/11200/5159/578/3987/22943/7133/115004/7043/1495/10269/4282/6774/51022/835/8932/7412/51384/26271/5743/90…
GO MULTICELLULAR ORGANISMAL SIGNALING	MULTICELLULAR ORGANISMAL SIGNALING	199	-0.49392	-1.91177	5.45641e-08	2.02599e-06	1.45681e-06	2255	tags=30%, list=12%, signal=26%	10768/486/6262/783/782/7220/5048/785/4916/8911/10142/274/8912/57731/1901/288/59284/3775/59283/55799/53822/6261/6334/477/79784/6326/3761/3760/492/9254/844/781/30845/10368/6323/29119/491/4099/3781/6327/6547/27092/3751/2898/3777/4878/53826/2257/6328/6543/26047/10369/4915/55800/3767/478/30818/30819/7143
GO REGULATION OF GLUTAMATE RECEPTOR SIGNALING PATHWAY	REGULATION OF GLUTAMATE RECEPTOR SIGNALING PATHWAY	63	-0.688259	-2.29873	5.56604e-08	2.05552e-06	1.47805e-06	2417	tags=67%, list=13%, signal=58%	88/54800/57554/729993/1393/50488/5649/2534/65018/2903/54413/22871/6376/2904/388336/59284/85358/1741/59283/1742/1612/81832/10368/57555/1740/4747/50944/2892/8787/22941/27092/23732/2890/54550/23542/5923/23025/10369/729956/2893/2891/2902
GO CELL ADHESION MOLECULE BINDING	CELL ADHESION MOLECULE BINDING	499	0.430586	1.63821	5.63591e-08	2.07014e-06	1.48856e-06	3082	tags=31%, list=16%, signal=27%	301/8407/10631/302/1281/1192/6696/6282/4478/10457/9124/114990/822/4323/3939/2335/87/255743/7045/3381/3678/1289/3912/977/11117/9133/10516/3491/11082/9636/8826/2316/7057/3383/3675/1903/1842/8840/800/1266/3691/93663/53827/7450/23075/3689/1969/50848/7060/3688/5764/3337/3913/30844/829/6772/5819/1490/7408/4430/9588/5216/3673/5034/3936/83706/8754/811/4067/3309/831/928/10226/81/1265/26136/11344/8842/1956…
GO MHC CLASS II PROTEIN COMPLEX	MHC CLASS II PROTEIN COMPLEX	14	0.946902	2.12472	5.70939e-08	2.08591e-06	1.4999e-06	780	tags=93%, list=4%, signal=89%	3122/3123/3115/3113/972/3117/3127/3119/3108/3111/3118/3109/3120
GO PRODUCTION OF MOLECULAR MEDIATOR OF IMMUNE RESPONSE	PRODUCTION OF MOLECULAR MEDIATOR OF IMMUNE RESPONSE	203	0.521213	1.86038	6.3347e-08	2.30206e-06	1.65532e-06	2820	tags=31%, list=15%, signal=26%	3598/972/7042/3119/3162/2207/684/23529/6556/567/7037/10945/10417/23075/8764/10875/10312/7097/54440/3077/3606/10673/91543/7040/2213/284/3140/958/9156/2590/3554/3134/202309/3133/5788/2821/10538/2150/7133/10459/7855/388325/115004/7043/3569/4282/3566/8915/7374/54795/3718/10859/4189/7293/695/6778/117854/7474/3575/7098/25939/2067
GO NEGATIVE REGULATION OF IMMUNE EFFECTOR PROCESS	NEGATIVE REGULATION OF IMMUNE EFFECTOR PROCESS	120	0.594182	2.02028	6.66593e-08	2.40961e-06	1.73266e-06	3958	tags=43%, list=21%, signal=35%	301/3958/710/3598/7042/3162/2302/684/11326/56833/10875/11221/11314/3077/84868/84695/7040/2213/284/2896/2/3134/100507436/3133/3965/5788/3559/4277/79594/5777/79132/7043/51043/7105/3566/3718/10475/10859/80149/3575/6223/8780/3142/3586/6895/7009/966/1604/708/2294/729230/8832
GO TUMOR NECROSIS FACTOR MEDIATED SIGNALING PATHWAY	TUMOR NECROSIS FACTOR MEDIATED SIGNALING PATHWAY	162	0.56029	1.94787	6.83621e-08	2.45336e-06	1.76412e-06	4453	tags=48%, list=23%, signal=37%	51330/7114/7132/4982/114769/55504/837/834/5696/5698/8764/83483/6772/10673/4055/5714/29108/958/81/3304/8970/84817/5701/8717/7128/841/8877/5688/5721/83643/330/3987/8737/5704/2150/7133/5686/60401/84888/149951/7185/5692/5711/5691/7293/6850/5682/5683/970/10293/5690/8742/5689/944/8740/3875/8741/5720/5700/10213/5699/5771/9020/5718/3303/5684/2950/2621/3611/8784/5719/5685/117584/5715/5708/7292/22900
GO MITOTIC NUCLEAR DIVISION	MITOTIC NUCLEAR DIVISION	263	0.49965	1.82682	6.85879e-08	2.45336e-06	1.76412e-06	3726	tags=37%, list=19%, signal=30%	991/84722/11065/9232/4605/332/891/55143/51203/11004/2316/22974/83987/24137/27338/10783/9212/858/9787/6790/10460/10403/4751/64151/699/10051/83540/9055/3833/5347/9493/1843/23397/1063/64105/10040/990/998/701/9319/7272/79980/4085/9820/3304/29127/995/81930/113130/3481/151648/54820/1111/11200/5159/2059/79998/9700/1062/7283/11130/10459/27243/10615/4288/5155/9928/81620/1104/91272/51529/79075/26271/5901/9…
GO ANTIMICROBIAL HUMORAL IMMUNE RESPONSE MEDIATED BY ANTIMICROBIAL PEPTIDE	ANTIMICROBIAL HUMORAL IMMUNE RESPONSE MEDIATED BY ANTIMICROBIAL PEPTIDE	74	0.670441	2.11482	7.00027e-08	2.49093e-06	1.79113e-06	3415	tags=30%, list=18%, signal=25%	4057/3627/6280/3576/85236/6039/6373/2597/4283/140823/3151/8970/10578/6037/2919/6170/8349/6223/8347/6283/5473/6372
GO PRESYNAPTIC ACTIVE ZONE	PRESYNAPTIC ACTIVE ZONE	71	-0.650722	-2.20141	7.82345e-08	2.76942e-06	1.99139e-06	2699	tags=49%, list=14%, signal=43%	23208/9900/776/1496/84446/1488/440279/6804/140730/140679/26059/114/320/22999/8499/8541/25957/2823/9912/9162/9783/2571/5864/9699/1008/6812/8927/5818/6855/57030/84628/6853/9378/112755/23025
GO NEGATIVE REGULATION OF CELL CYCLE PROCESS	NEGATIVE REGULATION OF CELL CYCLE PROCESS	325	0.465131	1.71972	8.30151e-08	2.9235e-06	2.10218e-06	3720	tags=36%, list=19%, signal=30%	10457/1031/991/1647/9232/6347/891/3976/6241/7465/1017/9212/1026/6790/5696/983/5698/5111/10403/4751/25959/22809/699/1263/5347/51512/1843/1063/10040/990/1019/701/9319/7272/2124/811/5714/678/56241/51514/4998/144455/1869/5932/4085/5888/5701/581/995/10385/4193/4582/2146/641/1021/51499/1111/5688/5721/11200/8737/9700/5704/10459/27243/3276/5686/91147/4282/63967/81620/5311/672/835/5692/5711/5691/10106/797…
GO POSITIVE REGULATION OF HEMOPOIESIS	POSITIVE REGULATION OF HEMOPOIESIS	185	0.534053	1.88651	8.99593e-08	3.1518e-06	2.26634e-06	2593	tags=32%, list=14%, signal=28%	301/4323/972/4192/3202/3976/760/9636/7305/54209/8651/182/3148/3725/11221/54440/861/6772/3059/3606/2353/2124/7040/9398/64332/2242/3304/338382/7071/1230/3965/10385/942/841/5788/920/85477/51176/4860/3559/7048/2737/8737/864/2296/3276/11006/51043/3566/10221/8772/6774/169200/10288/865/6850/695/116151/3071/3575
GO REGULATION OF NEURONAL SYNAPTIC PLASTICITY	REGULATION OF NEURONAL SYNAPTIC PLASTICITY	52	-0.699774	-2.25303	9.11537e-08	3.17736e-06	2.28472e-06	2435	tags=60%, list=13%, signal=52%	2915/729993/6770/23154/6900/3815/388336/8831/6622/57282/85358/26012/9148/1742/4763/348/8541/81832/9145/5864/3766/6855/6860/2898/815/5923/6543/23025/729956/2902/57338
GO NEUROMUSCULAR PROCESS CONTROLLING BALANCE	NEUROMUSCULAR PROCESS CONTROLLING BALANCE	52	-0.699415	-2.25187	9.25891e-08	3.21101e-06	2.30891e-06	2562	tags=46%, list=13%, signal=40%	9543/26058/2055/23543/84504/5048/29/16/4628/5881/1742/2905/8925/57555/4747/50944/613/111/9378/65217/84502/10083/57338/7143
GO PERIKARYON	PERIKARYON	138	-0.547076	-2.0542	9.90422e-08	3.41746e-06	2.45736e-06	3570	tags=50%, list=19%, signal=41%	6324/2332/1392/57537/9312/1943/6416/5594/2521/2899/54800/3736/3737/3361/58157/775/26058/23774/1393/5152/22933/7432/79641/3748/3756/2026/57698/9362/146760/57165/1501/3208/460/246213/5802/3775/7881/57282/349667/26012/23245/9148/7349/23001/3747/146713/22902/85442/5798/10439/1821/885/5602/8001/5274/65078/57699/1410/6547/1996/5126/3751/2898/23109/4692/6543/26047/3745/55273
GO POSTSYNAPSE ORGANIZATION	POSTSYNAPSE ORGANIZATION	165	-0.517276	-1.95928	1.07933e-07	3.69541e-06	2.65723e-06	2296	tags=40%, list=12%, signal=36%	5649/2534/6792/58504/10152/115703/22866/54413/9758/7074/5048/4916/22871/2668/22891/8997/10243/2904/11141/388336/1501/7804/25791/8831/4628/5802/2743/3480/85358/1741/55619/1742/10611/9762/347730/4744/348/80725/9912/26045/55607/91752/57555/1740/4747/50944/5789/2895/1607/4038/22941/5063/64101/9379/84628/375323/23316/26052/9378/8851/869/4983/2047/729956/6712/9118
GO REGULATION OF SYNAPSE ASSEMBLY	REGULATION OF SYNAPSE ASSEMBLY	105	-0.59081	-2.12525	1.08179e-07	3.69541e-06	2.65723e-06	1818	tags=37%, list=9%, signal=34%	4916/22871/11141/10507/5802/6622/84631/10611/347730/145581/147381/23284/64218/26045/22859/55607/26050/9231/57555/5789/2895/654429/57633/64084/347731/1141/5818/577/575/84628/114798/375323/23316/9378/869/4915/2047/6585/2902
GO POSITIVE REGULATION OF LEUKOCYTE MIGRATION	POSITIVE REGULATION OF LEUKOCYTE MIGRATION	130	0.580847	1.98685	1.13854e-07	3.86991e-06	2.7827e-06	4051	tags=47%, list=21%, signal=37%	5054/5919/3958/3627/7422/4323/972/4192/3576/9547/7057/3383/54209/728/6352/5880/4267/80310/23075/8764/7060/83483/5764/3673/811/196527/29108/63940/1230/719/3554/3965/199/2150/3676/6364/3569/8772/5724/7784/79647/3071/7474/8740/5025/387/7157/5641/6693/2358/708/6354/2621/5879/3579/729230/8784/284114/7423/51157/8291
GO NEGATIVE REGULATION OF CELL ADHESION	NEGATIVE REGULATION OF CELL ADHESION	273	0.489608	1.79157	1.17506e-07	3.97426e-06	2.85774e-06	2433	tags=30%, list=13%, signal=27%	301/5054/10631/1277/3958/3956/5320/10457/7422/2633/4323/972/4192/3371/7045/285/2302/6385/7057/2192/11326/8651/397/182/53827/6591/23075/57045/80380/1051/8764/10875/8324/2615/3659/861/11314/1843/114897/3077/8763/84868/91663/836/3204/84695/445/7040/2213/284/928/81/23129/3965/10385/942/27299/29126/4582/10395/9723/5788/1545/3559/2737/79626/94/864/5777/84959/6494/10459/2064/51043/10019/3566/3718/10859/…
GO REGULATION OF LEUKOCYTE DIFFERENTIATION	REGULATION OF LEUKOCYTE DIFFERENTIATION	270	0.488101	1.78671	1.23897e-07	4.16978e-06	2.99833e-06	2684	tags=30%, list=14%, signal=26%	301/4057/4323/972/4192/28959/3976/2302/3111/760/55365/7305/54209/714/8651/1051/56833/10875/3659/3725/11221/54440/861/3059/3606/3204/2353/84695/3665/2124/678/4067/7040/2213/9398/914/64332/2242/7071/1230/3965/10385/942/841/5788/920/1021/10272/51176/4860/4831/3559/7048/2737/27166/8737/864/5777/84959/2064/11006/150372/51043/3566/6988/2177/10221/8772/4830/3718/169200/10859/10288/80149/865/10234/6850/6…
GO LYMPHOCYTE ACTIVATION INVOLVED IN IMMUNE RESPONSE	LYMPHOCYTE ACTIVATION INVOLVED IN IMMUNE RESPONSE	181	0.532095	1.87621	1.27137e-07	4.25785e-06	3.06165e-06	2820	tags=29%, list=15%, signal=25%	301/3958/3956/4192/2207/23529/3109/6556/3383/602/7037/23075/10875/3606/1880/84868/84695/3936/7040/2213/958/5971/64332/9156/5873/3134/202309/3965/942/5788/51176/10538/2150/10459/5734/3569/54518/51043/4242/3566/7374/6774/3683/3718/10859/80149/6778/11151/4064/26253/3955/2067
GO NEUROMUSCULAR PROCESS	NEUROMUSCULAR PROCESS	107	-0.565601	-2.04172	1.336e-07	4.45246e-06	3.2016e-06	2783	tags=42%, list=15%, signal=36%	5728/3736/9543/1496/2906/26058/2055/84197/5071/23543/2903/1639/84504/5048/29/57680/16/4628/2743/8514/5881/1742/7349/64478/2905/8925/51761/23077/6323/112476/57555/4747/50944/2895/613/111/116443/2257/9378/65217/2902/84502/10083/57338/7143
GO POSITIVE REGULATION OF IMMUNE EFFECTOR PROCESS	POSITIVE REGULATION OF IMMUNE EFFECTOR PROCESS	208	0.514798	1.83616	1.47745e-07	4.89997e-06	3.52338e-06	3175	tags=33%, list=17%, signal=28%	301/3598/972/3162/2207/23529/718/3109/8673/5880/567/7037/10417/3689/8764/54440/11314/5819/3077/3606/2217/4067/91543/7040/958/64332/2242/3554/3134/100507436/3133/3965/942/5788/2821/4277/2150/79132/10459/7855/388325/2268/3569/4282/5817/3566/8915/8772/30817/10859/5724/5245/7784/7293/6850/695/6778/136/563/117854/7474/6223/5906/3684/7409/3142/55601/6813/8741
GO REGULATION OF HUMORAL IMMUNE RESPONSE	REGULATION OF HUMORAL IMMUNE RESPONSE	71	0.66387	2.09791	1.50333e-07	4.96171e-06	3.56778e-06	3694	tags=42%, list=19%, signal=34%	710/715/716/3426/2302/718/713/712/11326/728/714/5627/3075/717/2213/1191/2/719/5788/5777/730/5245/7784/721/629/720/966/3553/1604/708
GO MYELOID CELL DIFFERENTIATION	MYELOID CELL DIFFERENTIATION	411	0.442953	1.66481	1.51519e-07	4.97683e-06	3.57865e-06	2742	tags=29%, list=14%, signal=25%	4057/302/3958/4318/7422/972/87/3202/4015/3976/2207/56975/23601/760/9636/7057/7305/3217/8840/10398/54209/714/7538/182/7037/29887/1051/3148/1969/10312/3726/7097/3725/861/55509/6772/6688/3059/1880/836/3204/2353/4055/998/3665/2124/135228/4067/3020/3065/7040/9398/5971/2242/3304/338382/7071/3428/8444/1230/9948/116071/1945/841/126014/8365/920/1021/1050/22904/8294/85477/55170/10272/51176/4831/10538/7048/…
GO DEFENSE RESPONSE TO GRAM NEGATIVE BACTERIUM	DEFENSE RESPONSE TO GRAM NEGATIVE BACTERIUM	87	0.640007	2.07901	1.5854e-07	5.1825e-06	3.72654e-06	2179	tags=23%, list=11%, signal=20%	4057/5054/5919/4069/85236/6556/79792/6039/8764/3148/140823/29108/3140/4843/8970/920/6037/2150/3569/284297
GO INTERACTION WITH HOST	INTERACTION WITH HOST	204	0.522282	1.86573	1.76665e-07	5.74751e-06	4.13281e-06	2507	tags=28%, list=13%, signal=25%	3956/5806/972/857/3576/10410/3678/23601/7298/2519/3383/7852/8673/10581/858/1948/7037/983/3838/8764/6510/6737/1969/5478/50848/3688/1508/5819/2597/4233/3673/5034/85363/7040/1803/8692/3304/8519/290/1956/3965/942/1234/841/920/3693/27243/3690/5817/10898/10572/10475/6993/79581/7293/8724/3685
GO POSITIVE REGULATION OF I KAPPAB KINASE NF KAPPAB SIGNALING	POSITIVE REGULATION OF I KAPPAB KINASE NF KAPPAB SIGNALING	184	0.535843	1.89048	1.77871e-07	5.75931e-06	4.1413e-06	4575	tags=48%, list=24%, signal=37%	4057/6275/3956/972/3162/7132/684/114769/6284/2316/55504/4615/10783/389/834/6398/10346/9516/1894/4055/51246/85363/6285/958/1893/1902/8717/92610/3965/8795/2280/841/2149/920/79971/124583/8743/3661/330/6574/8737/79594/7188/2150/222068/60401/51135/84962/7105/4919/9641/8915/8772/10475/3557/2697/7052/7098/51026/23636/80216/6283/113277/5536/10392/387/54862/347734/9020/3552/3553/339123/10537/948/1499/3654…
GO SODIUM ION TRANSMEMBRANE TRANSPORT	SODIUM ION TRANSMEMBRANE TRANSPORT	142	-0.528231	-1.97288	1.83297e-07	5.90699e-06	4.2475e-06	1576	tags=25%, list=8%, signal=23%	348980/84679/8911/8912/25769/3799/123041/288/3775/6339/57657/10479/23072/53822/9311/6334/477/6326/81832/610/6323/5581/57419/65268/6327/6547/259232/57030/53826/2257/6328/41/6543/55800/55515/478
GO POSITIVE REGULATION OF VASCULATURE DEVELOPMENT	POSITIVE REGULATION OF VASCULATURE DEVELOPMENT	184	0.535434	1.88904	1.87151e-07	5.97587e-06	4.29702e-06	3168	tags=38%, list=17%, signal=32%	1116/301/5054/27286/358/133/7422/6648/126393/3315/4192/2152/3576/3678/3162/285/718/8038/7057/57381/7852/1958/728/1948/51129/7291/2022/80310/3689/7101/6237/187/3688/861/3099/56005/8829/2896/958/1536/1893/719/3696/1545/5315/8877/7048/25865/3082/4838/94/1003/3728/5155/6774/672/947/80149/5743/7474/7098/51564/5906/2246/79031/8742/3687/3586/10298/4780
GO CALCIUM ION REGULATED EXOCYTOSIS	CALCIUM ION REGULATED EXOCYTOSIS	66	-0.65885	-2.21053	1.87183e-07	5.97587e-06	4.29702e-06	1814	tags=47%, list=9%, signal=43%	8448/440279/6804/140730/8911/8912/6861/84258/9066/143425/22999/4851/8447/6844/148281/8618/5532/9783/57586/6854/5864/9699/192683/6857/6812/8941/6860/112755/23025/11069/3745
GO SYNAPTIC VESICLE RECYCLING	SYNAPTIC VESICLE RECYCLING	71	-0.640711	-2.16754	1.88978e-07	6.0051e-06	4.31804e-06	2806	tags=48%, list=15%, signal=41%	808/23208/6517/2259/1609/54413/114781/85439/1759/22871/8867/6804/6453/56850/6861/9066/273/6622/84162/5532/9829/5874/57555/5864/6857/6855/57030/29993/6620/26052/112755/4983/9892/6456
GO NEGATIVE REGULATION OF HYDROLASE ACTIVITY	NEGATIVE REGULATION OF HYDROLASE ACTIVITY	441	0.433752	1.63542	1.94522e-07	6.15267e-06	4.42415e-06	1735	tags=18%, list=9%, signal=17%	7076/301/4057/5054/3958/710/4318/358/5806/871/90853/7422/960/7042/10252/9232/5265/5266/332/2537/646424/684/4804/5329/718/114769/8826/7057/83987/5104/10253/10788/5176/4504/1266/12/5627/1800/56925/63898/1471/1992/51129/83596/286204/1475/4171/5918/50848/9104/1293/5764/23645/6590/5271/2597/2876/6195/135228/5269/7035/3001/831/1893/2/3428/10542/8530/2280/4193/221908/161742/51499/51176/636/330/3082/1095…
GO CELL CYCLE G1 S PHASE TRANSITION	CELL CYCLE G1 S PHASE TRANSITION	259	0.495824	1.8057	1.96095e-07	6.17384e-06	4.43937e-06	3885	tags=41%, list=20%, signal=33%	301/10457/1031/1647/586/6347/891/6241/56892/7298/7465/890/1017/1033/1026/6790/983/81610/5111/4171/25959/8318/6119/1263/3688/26524/9510/51512/84967/128239/990/1019/56241/4998/144455/1869/5932/581/995/1956/10385/4193/4582/2146/199/1021/51499/4175/4174/5721/11200/8737/4172/10926/5777/1978/5427/3276/4173/9928/81620/5311/835/23594/1104/6502/10106/5001/79733/6118/2810/51065/26271/84515/23649/993/5933/1…
GO NEGATIVE REGULATION OF MITOTIC CELL CYCLE	NEGATIVE REGULATION OF MITOTIC CELL CYCLE	311	0.466793	1.72181	2.01873e-07	6.32659e-06	4.54921e-06	3858	tags=38%, list=20%, signal=31%	10457/1031/991/1647/9232/6347/891/7465/7153/1017/9212/1026/6790/5696/983/5698/5111/10403/25959/10950/699/1263/5347/51512/1843/1063/51776/10040/990/1019/701/9319/7272/5714/678/2619/7040/4998/144455/1869/4085/5701/581/995/1956/10385/4193/4582/2146/55055/641/1021/51499/1111/5688/5721/220042/11200/8737/5704/2296/11130/10459/3276/5686/63967/81620/5311/672/835/5692/5711/5691/10106/79733/6118/3364/2810/…
GO FIBRINOLYSIS	FIBRINOLYSIS	27	0.840625	2.23269	2.03216e-07	6.3396e-06	4.55856e-06	960	tags=33%, list=5%, signal=32%	5054/302/710/5327/5328/5329/7057/5627/7056
GO TOLL LIKE RECEPTOR SIGNALING PATHWAY	TOLL LIKE RECEPTOR SIGNALING PATHWAY	144	0.564072	1.93872	2.06288e-07	6.40618e-06	4.60644e-06	3835	tags=42%, list=20%, signal=34%	4057/6280/857/6279/23643/4615/929/1513/1535/1520/81622/3689/7097/3659/1508/11314/23180/84868/1514/3665/4067/91543/81035/338382/3656/7128/7096/841/146722/7314/3661/330/8737/2150/388325/7867/11027/51135/10211/9641/8915/8772/7184/695/4214/7098/3684/9261/118788/51311/6197/10010/10318/26191/51284/5641/7316/948/3654/7311
GO HUMORAL IMMUNE RESPONSE MEDIATED BY CIRCULATING IMMUNOGLOBULIN	HUMORAL IMMUNE RESPONSE MEDIATED BY CIRCULATING IMMUNOGLOBULIN	47	0.736705	2.16218	2.12863e-07	6.58046e-06	4.73176e-06	1968	tags=40%, list=10%, signal=36%	710/715/716/3426/3119/51279/2302/718/713/712/714/602/717/2213/1191/9156/5788/5777/730
GO ORGANELLE FISSION	ORGANELLE FISSION	445	0.430827	1.62534	2.35071e-07	7.23427e-06	5.20189e-06	3886	tags=32%, list=20%, signal=26%	991/84722/11065/9232/4605/332/891/3976/55143/51203/7153/11004/2316/22974/83987/1164/24137/27338/10783/4599/9212/858/1634/9787/6790/2827/10460/10403/4751/64151/699/10051/83540/9055/3833/5347/9493/1843/23397/1063/64105/10040/990/998/701/9319/7272/79980/811/84057/4085/9820/3304/29127/5888/995/81930/8438/113130/259266/55706/3481/10609/151648/151246/54820/1111/7314/11200/5159/2059/79998/9700/79594/106…
GO REGULATION OF COAGULATION	REGULATION OF COAGULATION	82	0.640331	2.05944	2.46218e-07	7.54334e-06	5.42413e-06	2070	tags=35%, list=11%, signal=32%	10630/5054/302/710/5327/5328/857/2152/308/5154/2207/5329/7057/5627/10544/50848/79001/114897/7056/4067/7035/196527/928/5341/2149/84959/2150/5155/10019
GO INTRINSIC COMPONENT OF POSTSYNAPTIC DENSITY MEMBRANE	INTRINSIC COMPONENT OF POSTSYNAPTIC DENSITY MEMBRANE	54	-0.683637	-2.23069	2.47885e-07	7.56049e-06	5.43646e-06	2622	tags=54%, list=14%, signal=46%	57497/25945/729993/1630/2903/1949/388336/5802/59284/145581/401190/81832/26045/57689/10368/2066/22986/2895/64084/347731/27092/2894/64101/2890/1128/53616/114798/10369/2902
GO REGULATION OF CELL CYCLE PHASE TRANSITION	REGULATION OF CELL CYCLE PHASE TRANSITION	439	0.431339	1.62309	2.60301e-07	7.88225e-06	5.66783e-06	3720	tags=34%, list=19%, signal=28%	301/10457/1031/991/1647/11065/6347/891/56892/7465/22974/1017/10783/9212/1026/9787/6790/5696/983/81610/5698/5111/10403/4751/25959/8318/22809/699/1263/5347/9510/51512/1843/1063/84967/990/1019/701/9319/7272/5714/678/56241/51514/7846/4998/144455/1869/4085/8444/3161/5701/581/995/1956/115106/10385/4193/113130/4582/2146/199/641/1021/51499/54820/1111/5688/5721/10383/11200/8737/9700/5704/10926/1062/7283/5…
GO EXTRACELLULAR MATRIX STRUCTURAL CONSTITUENT CONFERRING TENSILE STRENGTH	EXTRACELLULAR MATRIX STRUCTURAL CONSTITUENT CONFERRING TENSILE STRENGTH	41	0.761373	2.18253	2.60742e-07	7.88225e-06	5.66783e-06	1624	tags=44%, list=8%, signal=40%	1282/1281/1292/1284/1277/1278/1290/1289/1295/1299/1291/1293/1296/50509/80781/1306/7373/1303
GO REGULATION OF WOUND HEALING	REGULATION OF WOUND HEALING	140	0.56215	1.93239	2.79207e-07	8.40327e-06	6.04247e-06	2688	tags=33%, list=14%, signal=28%	10630/301/5054/51330/302/710/5327/5328/857/2152/308/5154/2207/5329/7057/7852/8840/5627/1026/50848/11221/79001/114897/7056/135228/4067/7035/196527/928/5341/64581/7128/2149/7048/1839/84959/2150/5155/10019/4627/947/6850/4638/2697/2191/9076
GO T CELL ACTIVATION INVOLVED IN IMMUNE RESPONSE	T CELL ACTIVATION INVOLVED IN IMMUNE RESPONSE	105	0.607966	2.03934	2.97505e-07	8.91472e-06	6.41023e-06	2493	tags=32%, list=13%, signal=28%	301/3958/4192/2207/3109/6556/3383/602/10875/3606/1880/84868/84695/3936/2213/5971/64332/5873/3965/942/51176/10538/2150/5734/3569/54518/51043/3566/6774/3683/3718/10859/80149/6778
GO POTASSIUM CHANNEL COMPLEX	POTASSIUM CHANNEL COMPLEX	96	-0.577695	-2.06818	3.14348e-07	9.37829e-06	6.74357e-06	3387	tags=46%, list=18%, signal=38%	3778/9312/27345/3788/3773/2899/808/3736/9722/3737/3776/27012/3786/3748/3756/6804/348980/10142/1804/3775/8514/7881/1742/3746/6844/3747/3761/3760/56479/610/2900/3780/1740/57628/3751/2898/3785/6616/26047/6833/3745/3767/30818/30819
GO EXTRACELLULAR MATRIX DISASSEMBLY	EXTRACELLULAR MATRIX DISASSEMBLY	80	0.645493	2.07099	3.18152e-07	9.4505e-06	6.7955e-06	2100	tags=32%, list=11%, signal=29%	7076/10630/4318/4323/960/3915/4313/1513/1520/1471/4327/1514/3936/826/7040/1803/4316/2/285590/4320/6624/649/3569/4921/64147/10211
GO POTASSIUM CHANNEL ACTIVITY	POTASSIUM CHANNEL ACTIVITY	123	-0.540904	-1.97939	3.24562e-07	9.59917e-06	6.9024e-06	3387	tags=41%, list=18%, signal=34%	3778/9312/27345/3788/90134/3773/2899/3768/3736/3737/84286/3776/27012/3786/54207/3748/3756/57582/343450/10089/23416/348980/3775/8514/7881/57657/3746/56660/3747/3761/3760/56479/131096/610/2900/3780/3781/3766/3751/2898/3777/3782/3785/6616/6833/3745/3767/3765/30818/30819
GO HEPARIN BINDING	HEPARIN BINDING	172	0.531459	1.85634	3.50228e-07	1.03136e-05	7.41612e-06	2034	tags=26%, list=11%, signal=23%	4057/10631/6288/3627/10457/5322/11167/7422/5118/4192/6649/2335/53834/308/1289/3491/59271/7057/5104/59352/1842/8840/283/56925/3075/129804/7060/6373/5764/9510/51816/1490/50509/8829/4316/2260/9508/5788/4053/1839/9141/7059/26577/4856
GO REGULATION OF NEUROTRANSMITTER RECEPTOR ACTIVITY	REGULATION OF NEUROTRANSMITTER RECEPTOR ACTIVITY	72	-0.644628	-2.17579	3.6726e-07	1.07687e-05	7.7434e-06	2417	tags=58%, list=13%, signal=51%	88/54800/57554/729993/1393/50488/5649/65018/6714/2903/54413/22871/2904/388336/10142/4884/66004/59284/85358/1741/59283/1742/1612/81832/23467/10368/57555/1740/4747/50944/2892/8787/22941/27092/2890/23542/5923/10369/729956/2893/2891/2902
GO VACUOLAR MEMBRANE	VACUOLAR MEMBRANE	406	0.437919	1.64552	4.57585e-07	1.33599e-05	9.60661e-06	3726	tags=32%, list=19%, signal=27%	302/3122/3123/3115/3113/114990/972/10410/3117/3127/3119/64114/1356/684/3108/3111/967/3118/3109/440738/2357/8673/1889/112770/7805/80183/55686/11010/1291/10312/1650/9516/1175/81671/3120/55858/79901/8763/51374/8905/7056/2028/55062/5476/151636/1803/84557/2896/54918/51296/533/290/1534/10542/5908/84061/719/6185/3134/28956/25798/1509/92979/51100/9545/58986/340061/2783/5547/9296/4257/374395/9741/6009/839…
GO GLYCOSAMINOGLYCAN BINDING	GLYCOSAMINOGLYCAN BINDING	231	0.495733	1.78883	4.66227e-07	1.35543e-05	9.74638e-06	2412	tags=28%, list=13%, signal=25%	4057/10631/6288/3627/7130/10457/633/5322/11167/7422/5118/960/4192/6649/2335/53834/308/1289/3491/59271/7057/5104/59352/1842/8840/283/54209/1634/56925/3075/2022/129804/7060/7097/2799/6373/5764/9510/51816/1490/50509/8829/8692/4316/3161/2260/3512/9508/5788/4053/23166/7048/1839/9141/7059/26577/4856/145864/2135/1307/307/30817/143903/133584
GO REGULATION OF ION TRANSMEMBRANE TRANSPORT	REGULATION OF ION TRANSMEMBRANE TRANSPORT	472	-0.37951	-1.57052	4.70213e-07	1.36123e-05	9.78807e-06	3024	tags=31%, list=16%, signal=27%	9747/65267/3768/6330/8864/5243/25/88/808/54800/57554/5728/3736/9722/3737/91404/3064/776/2259/287/775/40/3306/2915/729993/27012/1393/50488/5649/2534/10768/3786/486/6262/65018/783/782/2903/54413/65125/54207/57520/57120/3748/7220/3756/785/22871/1908/6376/11060/2904/10089/57165/23416/348980/388336/8911/10142/28954/274/8912/3208/1804/3799/5999/288/59284/6622/8514/7881/85358/1741/57657/59283/55799/2307…
GO NEGATIVE REGULATION OF CELL CELL ADHESION	NEGATIVE REGULATION OF CELL CELL ADHESION	175	0.52096	1.81986	4.75795e-07	1.37157e-05	9.86246e-06	2433	tags=31%, list=13%, signal=28%	301/3958/5320/10457/7422/972/4192/2302/6385/11326/8651/182/53827/6591/23075/57045/80380/1051/8764/10875/2615/3659/861/11314/114897/3077/84868/91663/836/84695/445/7040/2213/928/3965/10385/942/29126/3559/2737/79626/864/5777/84959/10459/2064/51043/10019/3566/3718/10859/10288/80149/3557/865
GO AMINO ACID TRANSPORT	AMINO ACID TRANSPORT	141	-0.512314	-1.91914	4.8768e-07	1.39993e-05	1.00664e-05	1599	tags=27%, list=8%, signal=25%	6804/6534/140679/5999/246213/320/22999/6622/6541/4763/8499/8541/477/6844/83733/885/6511/5027/18/56262/388662/5864/3766/6857/6812/6506/81539/6529/6509/57709/6860/57030/6505/9256/11255/6616/4915/10815
GO NEGATIVE REGULATION OF VIRAL PROCESS	NEGATIVE REGULATION OF VIRAL PROCESS	99	0.606323	2.00603	5.37272e-07	1.53583e-05	1.10436e-05	2547	tags=38%, list=13%, signal=33%	4057/5806/10410/27350/5359/684/9636/4938/4599/10581/7538/6352/4939/4940/6737/60489/3725/6772/6590/64782/8638/91543/85363/3065/63901/9582/8519/3428/3669/55337/200316/5978/84875/9830/80149/140564/8724/117854
GO POSITIVE REGULATION OF EXCITATORY POSTSYNAPTIC POTENTIAL	POSITIVE REGULATION OF EXCITATORY POSTSYNAPTIC POTENTIAL	28	-0.796198	-2.19271	5.60859e-07	1.59658e-05	1.14804e-05	2296	tags=64%, list=12%, signal=57%	5649/54413/22871/6804/5999/22999/85358/1742/81832/5590/57555/50944/9699/22941/23316/9378/112755/2902
GO ERK1 AND ERK2 CASCADE	ERK1 AND ERK2 CASCADE	297	0.470953	1.72975	5.65091e-07	1.60195e-05	1.1519e-05	2730	tags=29%, list=14%, signal=26%	1116/5320/10457/81848/5322/2633/972/960/10252/2335/255743/6347/3976/5154/11117/3491/467/1848/2192/3383/10253/4504/54209/728/6352/6464/55584/81610/80310/112464/6237/1969/10268/5021/3725/11221/1843/1490/1880/128239/84868/8829/1846/5028/678/4067/9590/29108/7040/54206/284/5908/1230/8685/1956/3965/10385/2149/161742/195827/5788/920/50507/25865/5159/4838/2048/5777/2150/2064/5734/6364/388325/4282/5155/94…
GO NEURON PROJECTION GUIDANCE	NEURON PROJECTION GUIDANCE	282	-0.431352	-1.72679	5.7677e-07	1.6283e-05	1.17085e-05	2544	tags=32%, list=13%, signal=28%	9252/152330/54437/658/64919/6711/5649/2534/27255/10716/55740/2637/6091/1630/6714/5588/7430/1949/2909/5781/1944/7473/9846/5797/2668/323/659/53358/6900/9369/5364/51466/23053/10507/55715/10500/10509/3799/57731/3730/4628/57216/1400/55079/5909/85358/284656/6709/4781/56920/57715/23077/5365/64218/5578/223117/26999/5979/5295/2115/5727/3800/128434/11127/654429/494470/4684/5818/10570/1951/220164/214/3798/5…
GO DETOXIFICATION	DETOXIFICATION	132	0.559308	1.91178	6.01805e-07	1.69199e-05	1.21664e-05	3949	tags=42%, list=21%, signal=33%	6280/241/6648/6649/493869/4499/10516/2882/4493/4504/10549/5742/4502/9104/3240/3043/3039/1728/2876/9588/4489/4258/373156/5002/5292/84817/5052/195827/7295/4496/4495/4257/2643/3040/9446/55829/4494/5743/128/1193/2944/137902/51714/4780/2176/127700/6415/2936/948/2950/1719/4259/83667/10327/3046
GO LUMENAL SIDE OF MEMBRANE	LUMENAL SIDE OF MEMBRANE	29	0.806676	2.15555	6.42334e-07	1.79854e-05	1.29326e-05	2231	tags=66%, list=12%, signal=58%	3122/3123/3115/3113/972/3117/3127/3119/3118/3120/4924/811/5476/3134/3133/81502/84888/5311/10134
GO EMBRYO IMPLANTATION	EMBRYO IMPLANTATION	50	0.705511	2.08412	6.5422e-07	1.82434e-05	1.31181e-05	1709	tags=32%, list=9%, signal=29%	7076/6696/4318/3976/3490/2192/4313/85360/6781/397/81671/811/3020/2013/7048/4838
GO COMPLEMENT ACTIVATION	COMPLEMENT ACTIVATION	68	0.667761	2.09701	6.65664e-07	1.84871e-05	1.32933e-05	3694	tags=43%, list=19%, signal=35%	710/715/716/3426/51279/718/713/712/11326/728/714/5627/3075/1675/717/1191/2/719/730/5245/721/629/78989/720/966/8547/3553/1604/708
GO INTRINSIC COMPONENT OF PRESYNAPTIC MEMBRANE	INTRINSIC COMPONENT OF PRESYNAPTIC MEMBRANE	83	-0.60029	-2.09336	6.73107e-07	1.86181e-05	1.33876e-05	2763	tags=46%, list=14%, signal=39%	3736/3737/23208/1007/776/27255/148/27253/1949/6804/9066/5802/114/2558/3746/2913/6326/2823/3760/57863/401190/3356/6511/2066/2900/112476/1008/6506/1141/5818/1137/1128/6529/53826/84628/9378/1272/3765
GO MODULATION OF EXCITATORY POSTSYNAPTIC POTENTIAL	MODULATION OF EXCITATORY POSTSYNAPTIC POTENTIAL	41	-0.731737	-2.22494	6.94372e-07	1.91288e-05	1.37548e-05	2296	tags=49%, list=12%, signal=43%	5649/54413/22871/6804/5999/22999/85358/1742/81832/5590/57555/50944/9699/22941/56853/23316/9378/112755/869/2902
GO NEGATIVE REGULATION OF NERVOUS SYSTEM DEVELOPMENT	NEGATIVE REGULATION OF NERVOUS SYSTEM DEVELOPMENT	302	-0.418372	-1.67756	7.52187e-07	2.06383e-05	1.48402e-05	3121	tags=38%, list=16%, signal=32%	2664/5747/9706/55198/5567/9745/85458/657/29116/6664/57556/5728/27124/1840/23432/152330/5087/10363/4821/89927/283659/57801/22933/7025/2932/23405/56478/1656/9572/23108/1809/84376/10220/4761/1630/340533/6657/54413/7068/23105/1949/84504/7473/5048/4916/22871/23189/146760/6900/22891/6376/22876/27242/10507/3397/25791/5530/10500/10509/8831/6653/7248/2258/5802/51684/9693/1400/55079/23258/349667/57534/4763…
GO REGULATION OF EXOCYTOSIS	REGULATION OF EXOCYTOSIS	216	-0.450104	-1.7499	8.09679e-07	2.21269e-05	1.59106e-05	2142	tags=35%, list=11%, signal=32%	783/148/84961/23332/5071/8027/9515/23413/8448/29/22871/9846/134957/28964/5217/11141/6804/140730/94121/64780/321/8911/8912/6861/84258/6843/9066/8573/143425/320/22999/6622/5413/5414/4851/8499/8447/8398/6844/148281/9162/8618/5874/3356/29091/9783/112476/23122/63908/57586/5582/613/5864/9699/10675/203190/192683/7447/6857/6812/1141/1137/8941/116443/5579/115827/55512/6855/6860/4878/6853/112755/11069/1081…
GO POSITIVE REGULATION OF MYELOID CELL DIFFERENTIATION	POSITIVE REGULATION OF MYELOID CELL DIFFERENTIATION	91	0.621325	2.04288	8.83137e-07	2.39428e-05	1.72164e-05	2564	tags=37%, list=13%, signal=33%	972/3202/3976/760/9636/7305/54209/182/3148/3725/861/6772/3059/2353/2124/7040/9398/2242/3304/338382/7071/1230/841/920/85477/51176/8737/3276/10221/8772/6774/169200/116151/3071
GO SERINE TYPE ENDOPEPTIDASE INHIBITOR ACTIVITY	SERINE TYPE ENDOPEPTIDASE INHIBITOR ACTIVITY	91	0.621325	2.04288	8.83137e-07	2.39428e-05	1.72164e-05	1209	tags=19%, list=6%, signal=18%	5054/710/871/5265/5266/646424/5104/5176/12/1992/1293/6590/5271/135228/5269/7035/2
GO REGULATION OF PRODUCTION OF MOLECULAR MEDIATOR OF IMMUNE RESPONSE	REGULATION OF PRODUCTION OF MOLECULAR MEDIATOR OF IMMUNE RESPONSE	142	0.548604	1.88989	8.93682e-07	2.4133e-05	1.73531e-05	2684	tags=31%, list=14%, signal=27%	3598/972/7042/3162/2207/684/23529/567/7037/10417/8764/54440/3077/3606/91543/7040/2213/284/958/3554/3134/3133/5788/2821/2150/7133/10459/7855/388325/115004/7043/3569/4282/3566/8915/54795/3718/10859/7293/695/6778/117854/7474/7098
GO POSITIVE REGULATION OF CHEMOTAXIS	POSITIVE REGULATION OF CHEMOTAXIS	135	0.552737	1.8883	9.73232e-07	2.61777e-05	1.88234e-05	2047	tags=30%, list=11%, signal=27%	5054/5919/3627/7422/3315/972/4192/2152/3576/9547/7114/7057/7852/54209/728/6352/5880/80310/23075/7060/5764/8829/4233/3673/811/196527/63940/7040/1230/719/1902/2260/3965/199/25865/5159/6809/2150/3569/5155
GO DENDRITE MEMBRANE	DENDRITE MEMBRANE	42	-0.716801	-2.19406	9.7771e-07	2.61789e-05	1.88242e-05	2475	tags=50%, list=13%, signal=44%	2557/9495/729993/4355/3748/388336/3208/84687/5064/23710/2558/3746/3747/2554/2890/23109/2566/2565/3745/2556/729956
GO CONNECTIVE TISSUE DEVELOPMENT	CONNECTIVE TISSUE DEVELOPMENT	270	0.471176	1.72475	9.80942e-07	2.61789e-05	1.88242e-05	2238	tags=27%, list=12%, signal=24%	1116/7076/302/1292/1277/4256/871/633/960/4192/3202/4015/7045/4060/1289/54360/7298/6474/4017/3491/2202/59/64856/1958/8840/6781/1513/2487/3213/6591/80310/3221/1291/1293/861/25886/2121/1490/3200/5307/1019/6615/7040/4147/8692/1893/2828/3696/2260/2297/85477/7373/1303/11061/7314/57561/140606/7048/5159/2737/285590/94/864/649/11173/7059/10269/5744/4856/5155/9464/22856/54795
GO PROTEASE BINDING	PROTEASE BINDING	130	0.561353	1.92017	9.88143e-07	2.62685e-05	1.88887e-05	2680	tags=34%, list=14%, signal=29%	7076/5054/302/1281/1277/1278/2152/2335/5265/114769/5104/3675/1471/7450/1475/3688/836/5269/29108/1803/831/1893/2/9325/3554/7128/54507/624/10956/1476/4282/3690/10211/8915/2319/8772/57414/8996/10752/55829/91319/3685/2191/970
GO ENDOPEPTIDASE ACTIVITY	ENDOPEPTIDASE ACTIVITY	415	0.429993	1.61729	1.09509e-06	2.89987e-05	2.08519e-05	3021	tags=21%, list=16%, signal=18%	4057/4318/715/5327/5328/4323/716/2152/3426/51279/8038/4313/837/1513/834/1889/1520/1075/839/726/5696/1522/11098/5698/80332/94031/1508/3240/9510/25825/1675/6768/4327/8728/836/717/1514/8754/826/29108/1803/3001/2923/840/91419/4316/1636/9508/27299/841/1509/5688/3082/4320/8192/9700/140766/81502/5122/649/11173/5686/10269/9528/84888/5251/4285/5664/57414/2999/835/23385/5692/5691/11274/56999/7398/5682/2191…
GO INTRINSIC COMPONENT OF SYNAPTIC VESICLE MEMBRANE	INTRINSIC COMPONENT OF SYNAPTIC VESICLE MEMBRANE	46	-0.693568	-2.16241	1.11624e-06	2.94446e-05	2.11725e-05	2847	tags=57%, list=15%, signal=48%	57084/23208/9900/81615/5869/80331/7781/6804/140679/6843/5799/246213/5802/143425/132204/5874/9145/388662/5864/6857/115827/6855/6860/57030/6853/534
GO POSITIVE REGULATION OF MYELOID LEUKOCYTE DIFFERENTIATION	POSITIVE REGULATION OF MYELOID LEUKOCYTE DIFFERENTIATION	56	0.68166	2.05422	1.1364e-06	2.98611e-05	2.1472e-05	2285	tags=39%, list=12%, signal=35%	972/3976/760/7305/54209/3725/861/3059/2353/2124/7040/9398/2242/7071/1230/841/920/51176/8737/10221/8772/169200
GO REACTIVE OXYGEN SPECIES METABOLIC PROCESS	REACTIVE OXYGEN SPECIES METABOLIC PROCESS	265	0.478275	1.75038	1.14483e-06	2.99673e-05	2.15484e-05	3896	tags=40%, list=20%, signal=32%	4129/5806/6648/1647/857/6649/2537/10516/3491/7057/3383/7305/4504/706/2305/1535/5880/1026/10549/3689/9263/9104/7097/2717/3240/3099/1490/3043/3039/1728/2876/9588/445/140823/57103/7040/1191/1536/4688/64581/4843/54/1956/5165/5873/5052/4689/378/199/653361/50507/1545/683/7048/5159/285590/5547/8737/2150/2643/2539/5155/3040/6774/5311/672/947/2773/55829/80149/6850/255027/5743/2053/215/3684/51079/4358/7409…
GO EXCITATORY SYNAPSE	EXCITATORY SYNAPSE	51	-0.686625	-2.20783	1.21075e-06	3.1572e-05	2.27022e-05	2978	tags=75%, list=16%, signal=63%	392617/57084/23208/1496/9495/27255/794/54413/5332/22871/440279/388336/246213/114/1742/347730/3760/57863/9162/9127/81832/26045/10368/50944/2895/2892/6857/8927/64101/2890/6855/57030/869/3765/729956/6712/2891/2902
GO REGULATION OF RESPONSE TO WOUNDING	REGULATION OF RESPONSE TO WOUNDING	169	0.528769	1.83978	1.27288e-06	3.30659e-05	2.37764e-05	2688	tags=31%, list=14%, signal=27%	10630/301/5054/51330/302/710/6696/5327/5328/4192/857/2152/308/5154/2207/5329/7057/7852/8840/5627/1026/50848/5764/11221/79001/114897/7056/135228/4067/7035/196527/2896/928/5341/64581/7128/29956/2149/7048/89790/1839/84959/2150/5155/2281/10019/4627/947/6850/4638/2697/2191/9076
GO PHAGOCYTIC VESICLE	PHAGOCYTIC VESICLE	130	0.558145	1.9092	1.37102e-06	3.54649e-05	2.55015e-05	3779	tags=43%, list=20%, signal=35%	4057/7431/83871/10981/7791/6556/8673/1535/5880/567/81622/10312/7097/6890/998/811/2923/1536/4688/338382/533/3134/3133/7096/4689/653361/4641/84329/8992/9341/55647/10578/3693/9554/388325/71/83547/23682/4218/6850/8724/3685/11151/2934/5906/7454/3920/6813/8773/752/51284/6892/3916/948/55614/6891
GO REGULATION OF NERVOUS SYSTEM PROCESS	REGULATION OF NERVOUS SYSTEM PROCESS	135	-0.523789	-1.95873	1.37561e-06	3.54649e-05	2.55015e-05	2523	tags=36%, list=13%, signal=31%	3358/2906/729993/5649/23405/6714/54413/7432/22871/2911/745/6804/388336/27242/10142/4884/5999/56288/22999/6348/22997/85358/80763/1742/81832/885/23467/5590/1910/18/57555/50944/10810/4099/9699/22941/27092/56853/2257/23316/9378/112755/869/729956/118738/2902/55273/7143
GO TRANSMISSION OF NERVE IMPULSE	TRANSMISSION OF NERVE IMPULSE	70	-0.611961	-2.05973	1.41721e-06	3.63999e-05	2.61738e-05	1832	tags=33%, list=10%, signal=30%	5048/4916/8911/8912/57731/1901/288/59283/6334/79784/6326/10368/6323/4099/27092/3751/2898/2257/6328/26047/10369/4915/7143
GO TISSUE REMODELING	TISSUE REMODELING	165	0.536018	1.86587	1.46084e-06	3.738e-05	2.68785e-05	2651	tags=33%, list=14%, signal=29%	7076/301/6696/10457/633/3488/4323/4192/857/115908/64114/3976/4982/760/4313/1513/5880/1471/182/7037/29887/1969/10312/7060/5764/3606/3200/7040/54/581/1636/1956/7128/1945/4193/2149/50507/10609/9545/578/94/2296/84959/7043/3569/4921/3690/9464/54567/338773/169200/6850/51384/2697/7052
GO IMMUNE RESPONSE REGULATING CELL SURFACE RECEPTOR SIGNALING PATHWAY	IMMUNE RESPONSE REGULATING CELL SURFACE RECEPTOR SIGNALING PATHWAY	386	0.436761	1.63398	1.51047e-06	3.85057e-05	2.7688e-05	3451	tags=32%, list=18%, signal=27%	3958/3122/2214/3123/3115/3113/2633/3117/3127/3119/5359/2207/2212/3118/10451/2357/80381/728/6464/5696/5698/10095/3725/861/3120/11314/2359/5819/23180/2353/123920/998/10092/5714/2209/4067/2213/958/7462/5971/64332/60/644150/5701/719/581/3937/10385/4582/9473/5788/920/4641/11118/915/5688/5721/25865/3055/3783/4277/5704/5777/10096/2268/11027/11006/5686/150372/916/71/10094/114625/4893/10552/8915/29085/640…
GO INTERLEUKIN 1 PRODUCTION	INTERLEUKIN 1 PRODUCTION	102	0.597491	1.99942	1.51729e-06	3.85357e-05	2.77096e-05	3805	tags=42%, list=20%, signal=34%	301/6288/3315/114769/6284/7305/1903/1958/54209/79792/834/1992/84868/29108/54206/3140/64581/3428/54/3965/7128/841/2149/2150/7855/11027/115362/80149/4332/7474/353514/7850/945/51311/113277/80772/3586/10392/3553/384/948/2950/2621
GO COLLAGEN FIBRIL ORGANIZATION	COLLAGEN FIBRIL ORGANIZATION	52	0.69598	2.07176	1.56888e-06	3.96986e-05	2.85457e-05	1958	tags=58%, list=10%, signal=52%	2331/302/1281/165/1277/1278/871/1290/7042/4015/4060/1289/11117/4017/5352/5351/8985/79709/50509/84695/9508/10609/1545/7373/1303/4320/84171/140766/2296/4921
GO EXTERNAL SIDE OF PLASMA MEMBRANE	EXTERNAL SIDE OF PLASMA MEMBRANE	314	0.451309	1.66352	1.60336e-06	4.03216e-05	2.89938e-05	3214	tags=33%, list=17%, signal=28%	301/3598/3627/9332/2214/57124/972/2152/9180/3678/308/2207/4162/7057/5104/6382/3383/7852/3675/929/80381/1889/7037/2022/3689/80380/8764/3688/5175/3077/2217/3597/4283/3673/2028/5034/8754/811/2213/3140/8692/958/928/914/118429/4059/290/2348/1230/1636/80328/3554/3134/100507436/3133/3561/10385/942/1234/53340/29126/3672/5788/920/79054/11118/915/3559/7048/969/79465/4277/6338/1003/161198/916/10211/1441/114…
GO REGULATION OF TRANSPORTER ACTIVITY	REGULATION OF TRANSPORTER ACTIVITY	277	-0.421087	-1.67923	1.6091e-06	4.03216e-05	2.89938e-05	3157	tags=37%, list=16%, signal=31%	596/388591/23171/1815/1080/9747/65267/6330/5243/88/808/54800/57554/5728/3736/9722/3064/776/2259/287/3306/2915/729993/1393/50488/5649/10768/486/6262/65018/783/5444/782/2903/54413/65125/57520/57120/785/22871/11060/2904/388336/10142/28954/3208/3799/288/59284/6622/7881/85358/1741/59283/9143/23072/53822/1742/1394/3746/477/8398/6844/10105/3747/79026/1612/844/81832/4297/4644/781/30845/10368/5581/57555/1…
GO REGULATION OF DENDRITE DEVELOPMENT	REGULATION OF DENDRITE DEVELOPMENT	151	-0.506739	-1.90815	1.61121e-06	4.03216e-05	2.89938e-05	2853	tags=42%, list=15%, signal=36%	1627/5728/4976/79791/10084/1399/23098/2932/5649/6792/10152/1630/115703/54413/26039/23105/7074/57520/153090/5048/22871/8997/11141/6453/10507/23043/7804/3397/25791/5530/100132074/5802/9693/85358/23271/26012/23072/9148/10611/9762/348/80725/9912/85442/23373/55607/9231/57118/50944/22849/5789/22941/5063/124925/1141/577/5911/114788/29993/23316/26052/8851/2902
GO PHAGOCYTOSIS	PHAGOCYTOSIS	260	0.478344	1.74288	1.70978e-06	4.26321e-05	3.06551e-05	2888	tags=34%, list=15%, signal=29%	301/83871/5806/2214/6347/4481/2207/2212/55113/718/22918/10451/6556/7057/7305/4615/929/54209/1535/5880/10417/3689/10095/7097/3688/11314/5175/134/717/998/3673/10092/811/2209/4067/196527/81035/29108/2213/4688/64581/60/338382/10960/644150/9936/8685/5873/3561/4689/146722/199/5788/4641/8406/8877/3055/55647/10096/2150/9938/2268/71/10094/3690/10552/4627/391/3683/64005/10109/10163/5031/6850/8724/3685/3071…
GO LIGAND GATED CATION CHANNEL ACTIVITY	LIGAND GATED CATION CHANNEL ACTIVITY	105	-0.556141	-2.00054	1.7413e-06	4.32215e-05	3.10789e-05	1613	tags=27%, list=8%, signal=25%	2904/348980/3775/6339/6261/9311/2905/3761/3760/9127/610/2900/5027/2892/3766/1141/1137/116443/2890/2898/41/3767/3765/2893/2891/2902/84502/57338
GO NEGATIVE REGULATION OF LEUKOCYTE PROLIFERATION	NEGATIVE REGULATION OF LEUKOCYTE PROLIFERATION	80	0.623523	2.00051	1.74613e-06	4.32215e-05	3.10789e-05	3761	tags=49%, list=20%, signal=39%	5320/10457/2302/6385/7305/11326/57045/80380/1051/8764/2615/11314/84868/836/4067/2213/3965/7128/10385/942/29126/51083/3559/5777/7940/2064/51043/10859/10288/695/4332/3635/3586/5074/3620/6693/384/2950/6354
GO CALCIUM ION REGULATED EXOCYTOSIS OF NEUROTRANSMITTER	CALCIUM ION REGULATED EXOCYTOSIS OF NEUROTRANSMITTER	19	-0.859148	-2.15829	1.75239e-06	4.32215e-05	3.10789e-05	1727	tags=74%, list=9%, signal=67%	440279/140730/6861/9066/22999/8447/148281/9783/9699/6857/6812/6860/112755/23025
GO SCHAFFER COLLATERAL CA1 SYNAPSE	SCHAFFER COLLATERAL CA1 SYNAPSE	83	-0.587677	-2.04937	1.78577e-06	4.38863e-05	3.1557e-05	2699	tags=51%, list=14%, signal=44%	23208/5575/57497/2915/23096/2534/84961/1630/29/2911/134957/5217/321/5530/8573/5802/114/320/4744/9162/26045/57689/10368/5590/4747/50944/6854/613/1607/8927/64101/1128/6855/84628/6853/9378/10369/10815/2550/6456/9118/7143
GO CATECHOLAMINE SECRETION	CATECHOLAMINE SECRETION	61	-0.636403	-2.09822	1.85482e-06	4.54198e-05	3.26596e-05	3319	tags=49%, list=17%, signal=41%	150/4204/83849/51760/3737/23208/65018/11188/5071/7432/2668/6804/6861/84258/9066/143425/6622/148281/64805/3356/18/57586/6857/1141/1137/6860/6623/11255/3745/1113
GO REGULATION OF RESPONSE TO CYTOKINE STIMULUS	REGULATION OF RESPONSE TO CYTOKINE STIMULUS	173	0.514807	1.79648	1.87051e-06	4.56406e-05	3.28184e-05	2803	tags=34%, list=15%, signal=29%	9021/972/857/7132/114769/7852/54209/837/834/6352/8651/3460/83666/7097/861/6772/3665/29108/284/3304/1893/8970/3656/3554/64135/8717/7128/841/146722/5788/342979/8877/83643/3661/330/10555/8737/79594/5777/2150/3569/54625/84888/10019/9641/84166/7185/8772/11274/3557/865/6850/117854/7444/7474/51441/10293/7850/25939
GO POSITIVE REGULATION OF SYNAPSE ASSEMBLY	POSITIVE REGULATION OF SYNAPSE ASSEMBLY	66	-0.630915	-2.1168	2.07021e-06	5.01682e-05	3.6074e-05	1980	tags=44%, list=10%, signal=40%	54413/4916/22871/11141/10507/84631/347730/147381/23284/64218/26045/22859/26050/9231/57555/5789/2895/654429/57633/64084/347731/577/575/114798/23316/9378/869/4915/2047
GO LUMENAL SIDE OF ENDOPLASMIC RETICULUM MEMBRANE	LUMENAL SIDE OF ENDOPLASMIC RETICULUM MEMBRANE	23	0.829426	2.14476	2.07076e-06	5.01682e-05	3.6074e-05	2231	tags=74%, list=12%, signal=65%	3122/3123/3115/3113/972/3117/3127/3119/3118/3120/811/3134/3133/81502/84888/5311/10134
GO POSITIVE REGULATION OF LEUKOCYTE DIFFERENTIATION	POSITIVE REGULATION OF LEUKOCYTE DIFFERENTIATION	147	0.541326	1.87022	2.17164e-06	5.24264e-05	3.76978e-05	3513	tags=39%, list=18%, signal=32%	301/4323/972/4192/3976/760/7305/54209/8651/3725/11221/54440/861/3059/3606/2353/2124/7040/9398/64332/2242/7071/1230/3965/10385/942/841/5788/920/51176/4860/3559/7048/2737/8737/864/11006/51043/3566/10221/8772/169200/10288/865/6850/695/3071/3575/3635/3142/9308/3574/146850/387/677/2736/5925
GO RESPONSE TO CORTICOSTEROID	RESPONSE TO CORTICOSTEROID	162	0.527672	1.83448	2.34123e-06	5.63215e-05	4.04987e-05	2714	tags=30%, list=14%, signal=26%	3485/301/1277/358/133/4129/4192/3490/7298/8061/6382/3383/1261/5176/6781/7538/1535/1026/5111/2022/2706/1843/1490/836/2353/445/114907/2720/8754/678/7200/54206/6285/1536/1956/387758/199/5066/5978/1978/3569/5106/5724/3557/374/5743/9076/11335
GO REGENERATION	REGENERATION	188	0.508275	1.79847	2.38951e-06	5.72811e-05	4.11887e-05	2057	tags=29%, list=11%, signal=26%	301/4837/10631/6696/133/4192/3371/891/3162/285/5738/7298/10404/59352/890/2596/5634/57817/728/706/1026/6790/983/5111/1051/9104/8324/5764/3725/11221/3913/3077/2876/57190/1019/3936/4147/2896/928/2348/1956/29956/2146/5315/10413/7048/3082/2737/578/5782/3475/1495/4856/2281
GO DEFENSE RESPONSE TO GRAM POSITIVE BACTERIUM	DEFENSE RESPONSE TO GRAM POSITIVE BACTERIUM	101	0.589336	1.96905	2.40815e-06	5.75262e-05	4.13649e-05	2179	tags=24%, list=11%, signal=21%	5919/5320/4069/85236/2634/4615/728/79792/6039/8764/3148/1969/7097/84868/140823/8970/54/3133/6037/2268/3569/115361/6170/284297
GO B CELL ACTIVATION	B CELL ACTIVATION	244	0.471587	1.70996	2.43122e-06	5.7875e-05	4.16157e-05	3451	tags=33%, list=18%, signal=28%	3956/4323/972/2302/684/23529/10451/7305/602/1026/8935/7037/23075/196/56833/10312/3688/54440/11314/1880/10673/836/678/4067/7040/2213/958/7462/9156/200081/581/202309/7128/841/5788/1316/51176/683/10538/578/112616/64092/8660/5777/10459/3676/3569/150372/4282/4242/51293/7374/3718/4189/7412/7293/6850/695/6778/4332/3071/3087/3575/4773/970/4064/3955/2067/1054/3635/5580/3586/8741/5074/3574/1503/9466/5293/6…
GO SODIUM CHANNEL ACTIVITY	SODIUM CHANNEL ACTIVITY	44	-0.687481	-2.12256	2.46283e-06	5.84239e-05	4.20104e-05	1576	tags=43%, list=8%, signal=40%	348980/8911/8912/3775/6339/57657/9311/6334/6326/610/6323/2900/6327/259232/2898/6328/41/55800/55515
GO SKIN DEVELOPMENT	SKIN DEVELOPMENT	415	0.425288	1.59959	2.49446e-06	5.89693e-05	4.24026e-05	1979	tags=13%, list=10%, signal=12%	301/1281/1277/1278/1290/3488/7042/5266/1289/5154/3675/55504/7538/1513/3691/182/1475/8323/25932/1969/861/7357/6768/50509/2355/836/3204/1514/6615/4233/3673/23022/8754/826/135228/5920/3065/54206/1956/8717/3858/6608/3229/1829/51083/10413/4831/9620/57561/64834/1594/22943/2296/54345/3728/10269
GO DENDRITIC SPINE DEVELOPMENT	DENDRITIC SPINE DEVELOPMENT	98	-0.551639	-1.98388	2.64843e-06	6.23933e-05	4.48646e-05	2853	tags=44%, list=15%, signal=38%	1627/5728/4976/57492/5649/6792/10152/115703/54413/23105/7074/5048/22871/22891/8997/6453/1501/7804/25791/100132074/5802/85358/10479/9148/55619/1742/10611/9762/348/80725/9912/55607/9231/57468/50944/22849/22941/5063/815/23316/26052/8851/2047
GO OSSIFICATION	OSSIFICATION	382	0.434838	1.62649	2.70561e-06	6.35214e-05	4.56758e-05	2928	tags=32%, list=15%, signal=28%	4057/1277/1192/3486/6696/4256/1278/10457/1290/3488/4323/7042/4192/3371/4015/255743/3381/9902/115908/1052/56975/23601/6474/3491/9636/7171/8840/4313/25937/6781/1513/4435/182/29887/7291/6591/5552/57045/1291/1051/1969/10312/9260/3726/5764/51374/1490/8321/6615/3199/54857/196527/3020/7040/1836/1893/7071/8519/54829/1230/5701/54/1956/90993/6608/1021/1050/6320/3481/22904/10272/26578/51176/4665/3082/2737/2…
GO NEGATIVE REGULATION OF VIRAL LIFE CYCLE	NEGATIVE REGULATION OF VIRAL LIFE CYCLE	83	0.627433	2.02476	2.77577e-06	6.48473e-05	4.66292e-05	1345	tags=33%, list=7%, signal=30%	4057/5806/10410/27350/5359/684/9636/4938/4599/10581/6352/4939/4940/6737/60489/6590/64782/8638/91543/85363/63901/9582/8519/3428/3669/55337/200316
GO POSITIVE REGULATION OF NERVOUS SYSTEM PROCESS	POSITIVE REGULATION OF NERVOUS SYSTEM PROCESS	63	-0.641736	-2.14335	2.78107e-06	6.48473e-05	4.66292e-05	2296	tags=44%, list=12%, signal=39%	5649/23405/54413/22871/745/6804/5999/56288/22999/22997/85358/1742/81832/885/5590/18/57555/50944/10810/4099/9699/22941/23316/9378/112755/118738/2902/7143
GO CALCIUM ION TRANSMEMBRANE TRANSPORTER ACTIVITY	CALCIUM ION TRANSMEMBRANE TRANSPORTER ACTIVITY	137	-0.496807	-1.86324	2.82092e-06	6.55528e-05	4.71365e-05	2543	tags=33%, list=13%, signal=29%	776/2906/775/7222/6262/783/8416/782/2903/23413/7220/785/27112/2904/11141/8911/8912/25769/123041/59284/59283/55799/774/777/6261/2905/2823/492/9254/781/10368/491/773/57419/6547/27092/116443/9256/6543/10369/728215/5138/2902/84502/57338
GO MEMORY	MEMORY	119	-0.536825	-1.96951	2.85872e-06	6.61887e-05	4.75938e-05	2002	tags=36%, list=10%, signal=33%	2903/54207/114781/8997/1979/25769/100132074/2258/114/2648/85358/84896/814/348/8398/6326/338811/5532/3356/23373/81832/885/5590/22986/50944/22849/6547/4130/1141/57144/23236/2890/6860/57030/5923/41/4137/6543/23316/1620/729956/2902/57338
GO DNA REPLICATION	DNA REPLICATION	267	0.465988	1.70711	2.86766e-06	6.61887e-05	4.75938e-05	3621	tags=37%, list=19%, signal=30%	6282/6241/890/1017/983/9768/5111/4171/8318/6119/5982/3725/51659/8208/5937/990/998/9837/10535/51514/63901/4998/144455/5932/9156/5888/1956/2260/116028/641/4175/3159/4174/1111/580/92667/8914/11200/4172/94/10926/5983/5427/10269/4173/3399/5424/83743/63967/81620/6742/672/23594/378708/11284/5001/79733/5984/10036/157570/6118/84296/3364/3978/79075/26271/146956/84515/11169/23649/54962/10714/5928/25939/2998…
GO VOLTAGE GATED POTASSIUM CHANNEL ACTIVITY	VOLTAGE GATED POTASSIUM CHANNEL ACTIVITY	86	-0.57493	-2.02972	2.97927e-06	6.85332e-05	4.92796e-05	3839	tags=48%, list=20%, signal=38%	3741/3787/3739/3752/3778/9312/3788/90134/3773/3768/3736/3737/3776/27012/3786/3748/3756/57582/343450/23416/348980/3775/8514/7881/57657/3746/3747/3761/3760/56479/131096/610/3766/3751/3777/3785/6616/3745/3767/3765/30819
GO SYNAPTIC VESICLE ENDOCYTOSIS	SYNAPTIC VESICLE ENDOCYTOSIS	59	-0.644384	-2.10892	2.99578e-06	6.86441e-05	4.93594e-05	2806	tags=51%, list=15%, signal=44%	808/23208/6517/1609/54413/114781/85439/1759/22871/8867/6804/6453/6861/9066/273/6622/84162/5532/9829/5874/57555/6857/6855/57030/29993/6620/26052/4983/9892/6456
GO INTERFERON GAMMA PRODUCTION	INTERFERON GAMMA PRODUCTION	109	0.570057	1.92027	3.00678e-06	6.86441e-05	4.93594e-05	4047	tags=39%, list=21%, signal=31%	3115/3113/9636/6556/929/80381/602/80380/10312/54440/3606/84868/29108/914/64581/3554/3965/29126/11118/2150/7855/916/8772/10859/80149/7784/7474/7098/51311/1054/11119/3586/9466/26191/51284/3553/6693/708/2621/11035/729230/114836
GO POSITIVE REGULATION OF NEURON DIFFERENTIATION	POSITIVE REGULATION OF NEURON DIFFERENTIATION	368	-0.389715	-1.59489	3.01423e-06	6.86441e-05	4.93594e-05	2853	tags=32%, list=15%, signal=28%	1627/51760/6664/57554/5728/4976/79791/54700/57611/5753/2624/163404/4821/2803/151835/5649/4760/2534/8437/6792/221914/23426/402117/1809/4761/6091/375567/5071/4681/26039/6925/7074/2909/8648/153090/7473/5048/4916/55754/57698/22871/9362/659/118813/8997/5364/27/6376/2033/11141/6453/57498/22906/652/10507/9839/7804/51199/126520/84258/100132074/59284/22999/9693/55079/85358/9043/9148/1742/55906/429/51704/3…
GO CYTOKINE BINDING	CYTOKINE BINDING	129	0.548525	1.87253	3.09935e-06	7.03481e-05	5.05847e-05	3323	tags=36%, list=17%, signal=30%	10630/5355/3598/114990/2633/972/9180/7132/22918/7057/7852/7538/2022/57045/8764/2615/3688/4052/3597/8829/135228/8692/2/1230/3554/3561/1234/920/3559/7048/94/7133/3676/7043/3587/3690/1441/3557/3685/7046/7850/9034/10068/3560/57007/53832/9466
GO INTERLEUKIN 8 SECRETION	INTERLEUKIN 8 SECRETION	29	0.786666	2.10208	3.15412e-06	7.13542e-05	5.13081e-05	2581	tags=59%, list=13%, signal=51%	1116/301/965/7114/929/7097/29108/8692/914/4843/3965/7096/2149/2150/284297/307/7474
GO TERMINAL BOUTON	TERMINAL BOUTON	52	-0.650947	-2.09583	3.22505e-06	7.2718e-05	5.22888e-05	1756	tags=33%, list=9%, signal=30%	8867/440279/57465/64780/5799/6622/3747/885/5864/6855/2898/23025/4915/4983/10815/2902/10814
GO CONDENSED CHROMOSOME CENTROMERIC REGION	CONDENSED CHROMOSOME CENTROMERIC REGION	118	0.563876	1.90748	3.29391e-06	7.35922e-05	5.29173e-05	3285	tags=46%, list=17%, signal=38%	332/891/11004/79682/6990/9212/1058/6790/147841/55355/10403/4751/64151/1051/699/83540/5347/220134/1063/64105/221150/701/79019/79980/201161/387103/64946/23421/4085/55055/55839/79023/151648/151246/54820/1062/11130/10615/23157/81620/378708/57405/91272/9735/11335/57082/90417/222229/54821/201254/55320/79902/989/9918
GO GAMMA AMINOBUTYRIC ACID SIGNALING PATHWAY	GAMMA AMINOBUTYRIC ACID SIGNALING PATHWAY	25	-0.802652	-2.13776	3.29588e-06	7.35922e-05	5.29173e-05	1602	tags=52%, list=8%, signal=48%	23228/2560/2558/23349/2561/5334/2554/2566/2565/2556/2562/9568/2550
GO CELLULAR DETOXIFICATION	CELLULAR DETOXIFICATION	110	0.559503	1.88853	3.29614e-06	7.35922e-05	5.29173e-05	3949	tags=42%, list=21%, signal=33%	6280/241/6648/6649/493869/10516/2882/4504/10549/5742/9104/3240/3043/3039/1728/2876/9588/4258/373156/5292/84817/5052/195827/7295/4257/2643/3040/9446/55829/5743/128/1193/2944/137902/51714/4780/2176/6415/2936/948/2950/1719/4259/83667/10327/3046
GO DNA DEPENDENT DNA REPLICATION	DNA DEPENDENT DNA REPLICATION	146	0.529857	1.82403	3.60345e-06	8.01914e-05	5.76626e-05	3621	tags=44%, list=19%, signal=36%	1017/5111/4171/8318/6119/5982/51659/990/9837/4998/144455/5888/2260/641/4175/3159/4174/92667/8914/11200/4172/10926/5983/5427/10269/4173/5424/81620/6742/23594/378708/11284/5001/79733/5984/6118/84296/3978/79075/26271/146956/11169/23649/54962/10714/25939/29980/898/222229/30968/54107/5558/91607/55388/201254/10189/55159/5965/5557/201973/6117/8317/5425/56655
GO GABA RECEPTOR ACTIVITY	GABA RECEPTOR ACTIVITY	22	-0.821523	-2.1211	3.61846e-06	8.02641e-05	5.77149e-05	1549	tags=50%, list=8%, signal=46%	2560/2558/2561/2554/2566/2565/2563/2556/2562/9568/2550
GO PROTEIN PROCESSING	PROTEIN PROCESSING	213	0.496507	1.77784	3.64691e-06	8.06333e-05	5.79803e-05	3604	tags=33%, list=19%, signal=27%	5054/302/165/715/5327/5328/4323/2152/51279/114769/7057/834/1889/1520/1522/83596/5552/5230/25825/836/2028/2619/29108/1368/831/91419/3428/8530/1636/4193/9508/841/2023/330/2737/578/55851/81502/5122/10269/84909/9528/1203/4285/5664/4627/8772/8996/835/23385/79094/60559/51098/7850/2934/30968/5125/51107/1066/5566/1362/10159/90701/79147/5345/29100/120892/9509/28972/5641/5045
GO RESPONSE TO OXIDATIVE STRESS	RESPONSE TO OXIDATIVE STRESS	430	0.416091	1.56444	3.67206e-06	8.09275e-05	5.81919e-05	4216	tags=36%, list=22%, signal=29%	301/1277/4318/358/761/9124/6648/4323/3315/3939/6649/493869/3162/10516/8061/2882/6382/890/1017/9833/4504/4313/1535/1800/10549/983/5742/5111/80310/2706/9104/1263/3725/3240/1894/1843/6772/3043/3039/1728/836/2876/2353/57190/8321/9588/4233/29957/5034/8754/140823/84557/8692/1536/4688/3304/1956/11030/5052/7128/4193/4689/2119/406/2146/2730/199/653361/50507/1545/4831/7295/5159/54205/3082/578/4277/8737/425…
GO MONOSACCHARIDE BINDING	MONOSACCHARIDE BINDING	72	0.635342	2.01359	3.75472e-06	8.24831e-05	5.93105e-05	3282	tags=46%, list=17%, signal=38%	5836/5352/5351/2022/2203/55214/8985/3099/64175/81035/6515/8974/10960/3101/2997/3965/2645/2821/5066/2539/7360/1203/6518/5264/282969/388512/50856/80216/3998/682/81562/5033/78989
GO PEPTIDE HORMONE SECRETION	PEPTIDE HORMONE SECRETION	251	-0.424725	-1.67324	3.77258e-06	8.26098e-05	5.94015e-05	2574	tags=28%, list=13%, signal=25%	6720/8938/776/9854/3358/775/1393/5950/6755/4760/9572/6343/10411/5071/9515/7432/7074/5781/8997/6934/1908/2740/91608/6804/6453/94121/5530/3799/9066/5799/22841/143425/114/3156/55638/1394/777/7349/8447/8398/93/3747/9254/5578/5532/5798/4644/408/1363/18/5581/57555/773/55636/818/9699/7447/9024/111/6659/55512/2746/952/6616/2850/11069/10815/6833/375704/3745/3767
GO MUSCLE CELL MIGRATION	MUSCLE CELL MIGRATION	81	0.610319	1.96429	3.83942e-06	8.3805e-05	6.0261e-05	3168	tags=47%, list=17%, signal=39%	301/5054/10631/3486/5327/3488/5328/4192/5154/8826/8840/6352/80310/7060/9510/8829/3673/10092/3037/1902/1636/4193/6608/199/50507/5159/4856/5155/3690/10221/85440/5031/79647/9270/55742/84466/80031/4780
GO CYTOKINE ACTIVITY	CYTOKINE ACTIVITY	217	0.486118	1.74342	3.85909e-06	8.3966e-05	6.03767e-05	3415	tags=27%, list=18%, signal=22%	7076/6696/3627/10135/7422/9518/7042/3576/9547/6347/3976/4982/23529/6352/6398/1489/6373/9235/3606/10673/123920/4283/7040/10447/2896/51192/200081/7044/5008/2821/8743/58191/4838/112616/55258/649/6364/7043/3569/4282/2919/6362/3557/374/7474/284415/970/7857/8742/944/3586/8740/8741/5473/3574/152189/4693/6372
GO B CELL PROLIFERATION	B CELL PROLIFERATION	95	0.585078	1.92908	4.02525e-06	8.73032e-05	6.27764e-05	3313	tags=39%, list=17%, signal=32%	972/23529/10451/7305/1026/7037/196/54440/11314/1880/10673/836/4067/2213/958/581/202309/5788/51176/683/8660/4282/51293/7293/695/4332/3071/3575/4773/970/4064/3635/5580/3586/5074/3574/1503
GO PROTEIN LOCALIZATION TO POSTSYNAPTIC MEMBRANE	PROTEIN LOCALIZATION TO POSTSYNAPTIC MEMBRANE	43	-0.695814	-2.12973	4.32935e-06	9.36017e-05	6.73054e-05	2354	tags=53%, list=12%, signal=47%	23096/23426/2903/10243/388336/56850/59284/59283/55227/1742/2905/9912/5602/10368/5590/1740/27092/53616/6616/112755/10369/10815/2902
GO SMOOTH MUSCLE CELL MIGRATION	SMOOTH MUSCLE CELL MIGRATION	68	0.645482	2.02705	4.38938e-06	9.46001e-05	6.80234e-05	2421	tags=43%, list=13%, signal=37%	5054/10631/3486/5327/3488/5328/4192/5154/8826/8840/6352/80310/9510/8829/3673/10092/3037/1902/1636/4193/199/50507/5159/4856/5155/3690/10221/85440/5031
GO CONDENSED CHROMOSOME	CONDENSED CHROMOSOME	218	0.483213	1.73309	4.48486e-06	9.63539e-05	6.92844e-05	3405	tags=35%, list=18%, signal=29%	332/891/7153/11004/1017/79682/6990/9212/1058/6790/147841/55355/10403/4751/64151/1051/699/3148/10051/83540/5347/23397/220134/1063/64105/221150/701/79019/79980/201161/387103/64946/23421/4085/5888/3014/113130/55055/641/493861/10609/55839/79023/151648/151246/54820/1111/1062/7283/11130/10615/54892/4288/23157/81620/2177/672/1104/378708/57405/91272/3364/9735/11335/286053/57082/90417/222229/54821/201254/…
GO RESPONSE TO COPPER ION	RESPONSE TO COPPER ION	39	0.733593	2.0912	4.54801e-06	9.72751e-05	6.99468e-05	1693	tags=38%, list=9%, signal=35%	358/6649/4499/4017/6284/3383/4493/4504/983/4502/4489/84557/5066/4496/4495
GO NEGATIVE REGULATION OF DEFENSE RESPONSE	NEGATIVE REGULATION OF DEFENSE RESPONSE	206	0.480756	1.71456	4.55621e-06	9.72751e-05	6.99468e-05	3745	tags=35%, list=20%, signal=29%	710/9021/6288/7130/4192/7132/55872/5176/11326/9111/56833/10875/11221/84868/2876/134/29108/2213/2896/2/3428/8530/54/3134/284207/100507436/3133/3965/7128/5788/3559/284467/89790/3082/79626/4277/79594/1003/79132/7133/5734/54625/4856/7105/84166/10475/10859/5692/55829/80149/5682/6223/51441/7850/215/25939/8780/5580/3586/2629/4790/6895/225/64838/5771/5925/4907/66005/2358/384/708/2950/1588
GO POSITIVE REGULATION OF FIBROBLAST PROLIFERATION	POSITIVE REGULATION OF FIBROBLAST PROLIFERATION	50	0.684737	2.02275	4.66607e-06	9.93102e-05	7.14102e-05	2047	tags=44%, list=11%, signal=39%	302/358/6277/972/2335/891/5154/890/1026/80310/3725/2355/990/1019/1869/1956/1021/8877/5159/4921/4282/5155
GO NEGATIVE REGULATION OF RESPONSE TO BIOTIC STIMULUS	NEGATIVE REGULATION OF RESPONSE TO BIOTIC STIMULUS	93	0.59321	1.9494	5.00196e-06	0.000106129	7.63131e-05	2840	tags=34%, list=15%, signal=29%	4057/710/114769/11326/9111/56833/10875/11221/84868/2896/2/3428/3134/100507436/3133/3965/7128/3559/4277/79594/79132/11027/54625/7105/84166/10221/10475/10859/6223/51441/25939/8780
GO COLLAGEN BIOSYNTHETIC PROCESS	COLLAGEN BIOSYNTHETIC PROCESS	44	0.709908	2.05577	5.19379e-06	0.000109857	7.89943e-05	1945	tags=45%, list=10%, signal=41%	7431/1277/871/1289/11117/2022/1490/3673/7040/57333/54206/90993/9508/2149/4261/10609/5159/9697/7043/3569
GO IONOTROPIC GLUTAMATE RECEPTOR SIGNALING PATHWAY	IONOTROPIC GLUTAMATE RECEPTOR SIGNALING PATHWAY	26	-0.784448	-2.10343	5.23026e-06	0.000110287	7.93035e-05	2477	tags=65%, list=13%, signal=57%	2906/80315/2903/7074/2904/2905/2900/2895/2892/2894/116443/2890/2898/8851/2893/2891/2902
GO MITOCHONDRIAL PROTEIN COMPLEX	MITOCHONDRIAL PROTEIN COMPLEX	248	0.468689	1.70257	5.26703e-06	0.000110721	7.96153e-05	5844	tags=53%, list=31%, signal=37%	55013/56901/64960/6183/140823/9551/84419/440567/581/64979/400916/4696/51373/4725/26521/27089/64981/115416/515/51253/518/64983/55168/5163/28998/3028/4697/514/7386/29088/55101/4713/134266/57129/440574/55052/10452/6392/64968/7388/63875/6390/54927/125988/84769/10476/51079/4695/29093/1337/4707/4708/79135/54148/29796/9377/84701/3396/4717/128308/8801/64951/7818/9553/55173/10295/65003/7416/131118/4711/61…
GO RESPONSE TO STEROID HORMONE	RESPONSE TO STEROID HORMONE	384	0.422727	1.58157	5.5253e-06	0.000115794	8.3263e-05	2714	tags=24%, list=14%, signal=21%	3485/301/1277/6696/358/133/4129/7042/4192/857/4015/3490/7298/760/8061/7057/6382/3383/1261/5176/6781/706/7538/1535/1026/5111/2022/7041/25959/7101/2706/3148/7097/5021/5764/861/1843/1490/836/2353/7026/445/114907/2720/8754/811/678/7035/3065/7200/7040/54206/6285/1536/81606/9325/84709/1956/4193/387758/406/199/1829/26508/10413/51176/7048/5066/476/4838/5978/1978/7043/3569/56937/5106/672/6502/5724/5245/86…
GO AMINE TRANSPORT	AMINE TRANSPORT	97	-0.554048	-1.98556	5.57575e-06	0.000116494	8.37663e-05	3319	tags=38%, list=17%, signal=32%	150/83849/1815/8864/51760/3737/23208/9900/65018/5071/7432/2668/6804/6861/84258/9066/5999/143425/6622/477/148281/64805/3356/885/5027/18/57586/6857/6812/1141/1137/6529/6860/6623/11255/3745/1113
GO PEPTIDE ANTIGEN BINDING	PEPTIDE ANTIGEN BINDING	19	0.852507	2.07604	5.6214e-06	0.00011709	8.41947e-05	1350	tags=53%, list=7%, signal=49%	3122/3123/3115/3113/3117/3127/3119/6890/3134/3133
GO REGULATION OF VIRAL GENOME REPLICATION	REGULATION OF VIRAL GENOME REPLICATION	96	0.578367	1.90645	5.68009e-06	0.000117794	8.47011e-05	2547	tags=36%, list=13%, signal=32%	4057/3576/10410/27350/5359/684/9636/7153/4938/4599/10581/6352/4939/4940/5478/60489/6590/64782/8638/91543/63901/9582/8519/3428/3669/55337/200316/5479/10465/3429/84875/10475/80149/140564/117854
GO PROTEIN MATURATION	PROTEIN MATURATION	282	0.447373	1.63865	5.6897e-06	0.000117794	8.47011e-05	3604	tags=30%, list=19%, signal=25%	5054/302/165/715/5327/871/5328/4323/2152/51279/114769/7057/834/1889/1520/10549/1522/83596/5552/5230/25825/4826/836/2028/811/2619/29108/1368/831/91419/3428/8530/1636/2280/4193/9508/841/2023/330/2737/578/55851/84191/81502/5122/10269/84909/9528/1203/4285/2281/5664/4627/23557/8772/8996/835/23385/79094/60559/51098/51726/7850/2934/51126/26262/30968/5125/51107/1066/5566/7036/1362/10159/90701/79147/8260/…
GO RESPONSE TO AMMONIUM ION	RESPONSE TO AMMONIUM ION	182	-0.458456	-1.75399	5.79445e-06	0.0001196	8.6e-05	1549	tags=21%, list=8%, signal=19%	2560/3397/84687/5999/10014/5064/114/6622/57657/3350/2561/23284/3747/3356/1132/50632/18/5581/2554/5582/8682/8787/1141/1137/111/23236/27092/4062/1128/6529/2775/2774/11255/8851/2566/2562/2902/51617
GO HIPPOCAMPAL MOSSY FIBER TO CA3 SYNAPSE	HIPPOCAMPAL MOSSY FIBER TO CA3 SYNAPSE	34	-0.732408	-2.1311	5.98281e-06	0.000123116	8.85281e-05	2677	tags=53%, list=14%, signal=46%	793/5575/9465/25945/1496/7781/1949/9066/143425/114/26045/2900/6857/5818/2898/10369/11069/6456
GO CYTOKINE RECEPTOR BINDING	CYTOKINE RECEPTOR BINDING	281	0.456425	1.66887	6.0147e-06	0.000123401	8.87327e-05	3287	tags=26%, list=17%, signal=22%	3627/7422/9518/7042/3576/9547/6347/3678/64114/3976/7205/8835/23529/3556/4615/6352/6464/2022/1489/6373/200734/6772/3606/10673/836/4283/29108/7040/51192/1893/29097/8717/2280/7044/841/161742/146722/5008/8743/58191/7048/4838/8737/1003/7188/6364/7043/3569/51135/4282/3690/10019/6386/2919/10572/7185/8772/6774/6362/3557/6850/970/7046/9034/79031/8742/9618/944/3586/8740/8741/5473/3574
GO CENTRAL NERVOUS SYSTEM NEURON DIFFERENTIATION	CENTRAL NERVOUS SYSTEM NEURON DIFFERENTIATION	184	-0.461645	-1.76156	6.07831e-06	0.000124332	8.94027e-05	3146	tags=38%, list=16%, signal=32%	151449/5747/23287/266727/5629/9201/6886/2016/57688/5728/1399/2624/4821/26058/64919/2055/10716/4040/2637/6091/1630/9331/2909/84504/7473/5048/6900/2560/9839/51199/57731/51684/9693/55079/57282/85358/8861/5881/4852/4781/55906/429/3400/166614/51286/8925/23077/1454/6656/85442/2066/161357/6695/5727/64211/2895/26038/1141/6659/4133/388585/4137/869/23017/4915/4983/2047/10215/6423
GO SPECIFIC GRANULE LUMEN	SPECIFIC GRANULE LUMEN	62	0.644637	1.98687	6.16673e-06	0.000125764	9.04325e-05	2908	tags=39%, list=15%, signal=33%	1116/4057/5806/4069/79792/567/1522/8836/3240/6590/1265/25797/5873/126014/1509/124583/5777/3728/2919/4758/23071/7414/23191/1774
GO NIK NF KAPPAB SIGNALING	NIK NF KAPPAB SIGNALING	164	0.515177	1.79528	6.38406e-06	0.000129809	9.33409e-05	4295	tags=43%, list=22%, signal=34%	1116/7114/7205/56892/929/54209/602/5696/5698/7097/9516/3606/84868/811/5714/5971/81/5701/1956/5052/8717/3965/8795/5531/8877/5688/5721/330/3987/5704/5686/4856/11156/7105/9641/55075/5692/5711/5691/80149/5682/51094/5683/7098/51564/5690/9618/5689/8740/5720/4790/10392/26191/5700/387/51284/10213/5699/9020/3553/5718/5684/3654/3611/8454/11035/5719/5685/10920/5715/5708
GO REGULATION OF SYNAPTIC VESICLE FUSION TO PRESYNAPTIC ACTIVE ZONE MEMBRANE	REGULATION OF SYNAPTIC VESICLE FUSION TO PRESYNAPTIC ACTIVE ZONE MEMBRANE	11	-0.916438	-2.0218	6.48486e-06	0.000131467	9.45333e-05	1400	tags=82%, list=7%, signal=76%	6843/9066/143425/112476/5864/6857/6812/10815/10814
GO REGULATION OF LEUKOCYTE CHEMOTAXIS	REGULATION OF LEUKOCYTE CHEMOTAXIS	112	0.55742	1.88522	6.66093e-06	0.000134637	9.68127e-05	4051	tags=45%, list=21%, signal=35%	5054/5919/3627/7422/972/4192/3576/9547/6347/7057/728/6352/5880/23075/56833/7060/5764/1843/811/4067/196527/63940/1230/719/3965/199/683/2150/3569/4282/4856/80024/79647/3071/7474/83700/8740/5641/2358/708/1588/6354/2621/5879/3579/729230/284114/7423/51157/8291
GO CARTILAGE DEVELOPMENT	CARTILAGE DEVELOPMENT	207	0.486759	1.73526	7.05642e-06	0.000142211	0.000102258	2034	tags=27%, list=11%, signal=24%	1116/7076/302/1292/1277/4256/871/633/960/4192/3202/7045/4060/54360/7298/6474/4017/3491/2202/64856/8840/6781/1513/2487/3213/6591/3221/1291/1293/861/25886/2121/1490/3200/5307/6615/7040/4147/8692/1893/3696/2260/85477/7373/1303/11061/7048/2737/94/864/649/11173/7059/10269/5744/4856
GO NEGATIVE REGULATION OF VIRAL GENOME REPLICATION	NEGATIVE REGULATION OF VIRAL GENOME REPLICATION	60	0.658363	2.01149	7.09531e-06	0.000142574	0.000102519	1345	tags=40%, list=7%, signal=37%	4057/10410/27350/5359/684/9636/4938/4599/10581/6352/4939/4940/60489/6590/64782/8638/91543/63901/9582/8519/3428/3669/55337/200316
GO REGULATION OF CATION CHANNEL ACTIVITY	REGULATION OF CATION CHANNEL ACTIVITY	177	-0.462304	-1.76642	7.1517e-06	0.000142956	0.000102794	2863	tags=38%, list=15%, signal=33%	88/808/54800/57554/3736/9722/3064/2259/287/729993/1393/50488/5649/65018/783/782/2903/54413/785/22871/2904/388336/28954/3208/3799/288/59284/7881/85358/1741/59283/1742/1394/3746/8398/6844/3747/79026/1612/844/81832/4644/781/30845/10368/57555/1740/4747/50944/2892/8787/22941/27092/9472/2890/4878/23542/2257/5923/10369/3767/729956/2893/2891/2902/84502/30819/57338
GO ANTIGEN RECEPTOR MEDIATED SIGNALING PATHWAY	ANTIGEN RECEPTOR MEDIATED SIGNALING PATHWAY	234	0.468266	1.6908	7.15616e-06	0.000142956	0.000102794	4480	tags=41%, list=23%, signal=32%	3958/3122/3123/3115/3113/2633/3117/3127/3119/3118/10451/80381/5696/5698/861/3120/11314/5819/23180/123920/5714/4067/2213/7462/64332/5701/581/3937/10385/9473/5788/920/11118/915/5688/5721/25865/3783/5704/5777/11006/5686/150372/916/114625/8915/29085/84106/5692/5711/5691/8891/80149/865/6850/695/4332/5682/3071/4773/5683/5690/2533/7454/30968/11119/3635/5689/5074/5720/4790/9404/26191/5700/5293/10213/5699…
GO REGULATION OF DOPAMINE SECRETION	REGULATION OF DOPAMINE SECRETION	39	-0.696552	-2.06459	8.0947e-06	0.000161233	0.000115937	2818	tags=51%, list=15%, signal=44%	51760/3737/23208/65018/5071/2668/6861/84258/9066/143425/6622/148281/3356/18/57586/6857/1141/1137/6860/6623
GO REGULATION OF DENDRITE MORPHOGENESIS	REGULATION OF DENDRITE MORPHOGENESIS	92	-0.557928	-1.97543	8.30141e-06	0.00016487	0.000118552	2966	tags=49%, list=15%, signal=42%	29882/1627/5728/4976/79791/10084/23098/2932/5649/6792/10152/115703/54413/26039/7074/57520/5048/22871/8997/11141/10507/23043/7804/3397/25791/5530/9693/85358/26012/23072/10611/9762/80725/9912/85442/55607/5789/5063/1141/577/5911/23316/26052/8851/2902
GO VOLTAGE GATED CALCIUM CHANNEL COMPLEX	VOLTAGE GATED CALCIUM CHANNEL COMPLEX	43	-0.685399	-2.09785	8.44428e-06	0.000167221	0.000120242	2762	tags=49%, list=14%, signal=42%	9722/776/775/3306/783/782/785/8911/8912/59284/59283/55799/774/777/6261/9254/781/10368/773/27092/10369
GO ACUTE PHASE RESPONSE	ACUTE PHASE RESPONSE	47	0.691867	2.03058	8.53288e-06	0.000168487	0.000121153	3594	tags=45%, list=19%, signal=36%	6288/9332/2335/5265/5359/57817/12/1051/1268/3240/3077/445/6289/3569/6774/23780/5743/7036/5345/3552/3553
GO MONONUCLEAR CELL MIGRATION	MONONUCLEAR CELL MIGRATION	88	0.587244	1.91586	8.60922e-06	0.000168965	0.000121496	2047	tags=26%, list=11%, signal=23%	301/5054/5919/3958/3627/4192/6347/7057/728/6352/80310/56833/1843/5175/4067/196527/1230/719/199/6364/3569/4856/5155
GO MODIFICATION OF MORPHOLOGY OR PHYSIOLOGY OF OTHER ORGANISM	MODIFICATION OF MORPHOLOGY OR PHYSIOLOGY OF OTHER ORGANISM	163	0.502446	1.7466	8.62159e-06	0.000168965	0.000121496	1871	tags=21%, list=10%, signal=19%	4057/302/358/6280/5806/4069/7298/85236/57817/858/79792/6352/8542/3838/3725/6590/2597/5551/140823/3065/7040/3151/8692/64581/4843/8970/5479/841/920/51176/3429/10578/2150/5978
GO RESPONSE TO FUNGUS	RESPONSE TO FUNGUS	52	0.676133	2.01268	8.63124e-06	0.000168965	0.000121496	2484	tags=33%, list=13%, signal=29%	4057/5919/6280/5806/6279/57817/10417/23406/2597/84818/64581/578/10578/388325/8915/6850/695
GO POSITIVE REGULATION OF ADAPTIVE IMMUNE RESPONSE	POSITIVE REGULATION OF ADAPTIVE IMMUNE RESPONSE	102	0.576258	1.92836	8.94076e-06	0.000174524	0.000125493	2523	tags=34%, list=13%, signal=30%	301/2207/23529/718/6556/567/7037/54440/5819/3077/3606/2217/10673/91543/29108/7040/958/64332/3554/3134/100507436/3133/29126/5788/920/4277/10459/7855/3569/5817/8772/7784/695/6778/563
GO VIRAL GENOME REPLICATION	VIRAL GENOME REPLICATION	123	0.541221	1.8478	9.014e-06	0.000175452	0.000126161	1467	tags=26%, list=8%, signal=24%	4057/3576/10410/6347/27350/5359/684/9636/7153/4938/4599/10581/6352/4939/4940/5478/60489/6590/64782/998/8638/91543/63901/9582/8519/3428/3669/10542/55337/200316/5479/10465
GO CELLULAR RESPONSE TO CHEMICAL STRESS	CELLULAR RESPONSE TO CHEMICAL STRESS	333	0.430234	1.59502	9.13678e-06	0.000176675	0.00012704	4216	tags=39%, list=22%, signal=31%	301/4318/358/6648/3315/857/6649/493869/3162/362/10516/2882/890/1017/9833/4504/4313/706/1535/1800/983/355/5111/8531/80310/2706/9104/3725/1894/1728/836/2876/2353/57190/8321/9588/1649/4233/29957/5034/5269/140823/84557/54206/1536/5971/4688/3304/1956/5052/7128/4193/4689/2119/406/2146/199/653361/50507/1545/4831/7295/54205/3082/8737/624/4257/5978/3569/2643/2539/5163/2177/51022/5311/8996/221/2861/55829/8…
GO AMPA GLUTAMATE RECEPTOR COMPLEX	AMPA GLUTAMATE RECEPTOR COMPLEX	26	-0.774382	-2.07644	9.14477e-06	0.000176675	0.00012704	2417	tags=69%, list=13%, signal=61%	729993/402117/375567/118427/388336/59284/1741/59283/1742/57406/10368/2892/27092/2890/10369/729956/2893/2891
GO GLUTAMATE RECEPTOR BINDING	GLUTAMATE RECEPTOR BINDING	42	-0.686914	-2.10258	9.1544e-06	0.000176675	0.00012704	2806	tags=52%, list=15%, signal=45%	808/5728/3092/9495/2534/388336/85358/1741/1742/81832/10368/50944/22941/27092/54550/815/5923/26052/8851/10369/4983/729956
GO CELL CYCLE DNA REPLICATION	CELL CYCLE DNA REPLICATION	64	0.635638	1.96378	9.36825e-06	0.000180293	0.000129642	3621	tags=56%, list=19%, signal=46%	5111/4171/8318/6119/5982/9837/144455/5888/2260/4175/4174/11200/4172/10926/5983/5427/10269/4173/5424/81620/79733/5984/6118/3978/26271/23649/54962/10714/29980/54107/5558/5557/6117/8317/5425/56655
GO INSULIN LIKE GROWTH FACTOR BINDING	INSULIN LIKE GROWTH FACTOR BINDING	29	0.762764	2.03821	1.1235e-05	0.000215612	0.000155038	860	tags=41%, list=4%, signal=40%	3485/3486/3488/3490/3491/11082/3487/8840/3691/3489/94031/1490
GO CARDIAC CONDUCTION	CARDIAC CONDUCTION	141	-0.47451	-1.77753	1.15687e-05	0.000221393	0.000159196	2543	tags=32%, list=13%, signal=28%	776/287/775/10768/486/6262/783/782/7220/785/10142/274/57731/59284/3775/59283/55799/53822/6261/477/3761/3760/492/9254/844/781/30845/10368/29119/491/3781/6327/6547/27092/3751/3777/4878/53826/6543/10369/55800/3767/478/30818/30819
GO METAPHASE ANAPHASE TRANSITION OF CELL CYCLE	METAPHASE ANAPHASE TRANSITION OF CELL CYCLE	56	0.650214	1.95945	1.16116e-05	0.000221594	0.00015934	2773	tags=41%, list=14%, signal=35%	991/891/10783/9212/9787/10460/10403/699/5347/1843/1063/990/701/9319/7272/4085/9700/1062/10459/81620/51529/26271/286053
GO ANIMAL ORGAN REGENERATION	ANIMAL ORGAN REGENERATION	72	0.615073	1.94935	1.16942e-05	0.000222523	0.000160008	1714	tags=35%, list=9%, signal=32%	4837/133/3162/285/7298/890/5634/57817/728/1026/6790/983/5111/1051/9104/3077/1019/3936/1956/2146/5315/7048/3082/2737/578
GO INTEGRIN MEDIATED SIGNALING PATHWAY	INTEGRIN MEDIATED SIGNALING PATHWAY	104	0.568908	1.9089	1.17375e-05	0.000222523	0.000160008	2888	tags=46%, list=15%, signal=39%	7076/1281/3678/2207/7791/3679/967/10451/9636/2316/3675/7305/3691/3689/3688/5764/9510/1490/84695/998/8829/3673/83706/8754/5341/2013/3696/3672/4831/683/3055/4739/3987/3693/3676/2268/1495/3690/4627/3683/1307/84106/6850/3685/9270/3684/2533/7409
GO POSITIVE REGULATION OF CYTOKINE BIOSYNTHETIC PROCESS	POSITIVE REGULATION OF CYTOKINE BIOSYNTHETIC PROCESS	67	0.634061	1.98372	1.17833e-05	0.000222523	0.000160008	3596	tags=46%, list=19%, signal=38%	3315/972/3162/7057/7305/1958/80381/602/3659/9590/1536/64581/942/7096/5788/920/3569/916/8915/6774/5724/6850/7474/7098/9261/51311/1054/51284/3552/3553/6693
GO INSULIN SECRETION	INSULIN SECRETION	206	-0.434256	-1.68564	1.17906e-05	0.000222523	0.000160008	2574	tags=28%, list=13%, signal=25%	6720/8938/776/9854/775/5950/6755/4760/9572/10411/5071/9515/7074/5781/6934/2740/6804/94121/5530/3799/9066/5799/22841/143425/114/3156/55638/777/8447/8398/93/3747/9254/5578/5532/5798/4644/408/18/5581/57555/773/818/9699/7447/9024/111/6659/2746/952/6616/2850/11069/10815/6833/375704/3745/3767
GO DETECTION OF STIMULUS INVOLVED IN SENSORY PERCEPTION	DETECTION OF STIMULUS INVOLVED IN SENSORY PERCEPTION	483	-0.352185	-1.46078	1.19546e-05	0.000224997	0.000161786	3586	tags=5%, list=19%, signal=4%	259290/79955/4025/259294/7439/3736/11190/54437/40/2534/5270/284521/390429/3815/50832/92840/9311/23349/51761/3356/6323/10893/84059/2047/285093
GO IMMUNOGLOBULIN BINDING	IMMUNOGLOBULIN BINDING	23	0.80351	2.07774	1.29971e-05	0.000243946	0.000175412	1955	tags=48%, list=10%, signal=43%	3958/2214/2207/2212/7450/2217/2209/2213/3512/920/11027
GO RECEPTOR LOCALIZATION TO SYNAPSE	RECEPTOR LOCALIZATION TO SYNAPSE	55	-0.639463	-2.08882	1.30751e-05	0.000244736	0.000175981	2354	tags=62%, list=12%, signal=54%	27065/80852/23513/8417/1627/57554/23096/5649/23426/22871/10243/388336/56850/3799/59284/1741/59283/55227/1742/9912/56899/81832/5602/10368/5590/1740/3800/27092/53616/3798/6616/112755/10369/10815
GO CHROMOSOME SEPARATION	CHROMOSOME SEPARATION	88	0.581243	1.89629	1.35079e-05	0.000252148	0.00018131	3513	tags=36%, list=18%, signal=30%	991/9232/891/7153/10783/9212/9787/10460/10403/699/5347/1843/23397/1063/990/701/9319/7272/4085/9700/1062/10459/81620/378708/51529/26271/146956/286053/201254/9918/246184/5925
GO ENDODERM FORMATION	ENDODERM FORMATION	50	0.6701	1.97951	1.38701e-05	0.000258204	0.000185665	1906	tags=36%, list=10%, signal=32%	1284/4318/1290/4323/2335/3678/1289/3912/1295/3679/4313/3689/1291/1303/4838/3693/22943/3676
GO LEUKOTRIENE METABOLIC PROCESS	LEUKOTRIENE METABOLIC PROCESS	29	0.758855	2.02777	1.42552e-05	0.00026465	0.0001903	4017	tags=45%, list=21%, signal=35%	241/5322/1800/7097/240/4258/22949/2687/6850/9261/4363/4259/4051
GO CELLULAR RESPONSE TO TOXIC SUBSTANCE	CELLULAR RESPONSE TO TOXIC SUBSTANCE	234	0.460333	1.66215	1.47798e-05	0.000273646	0.000196768	3949	tags=38%, list=21%, signal=31%	301/358/6280/241/6648/6649/493869/3162/10516/2882/1958/4504/567/10549/983/5742/5111/80310/9104/3240/1894/6688/3043/3039/1728/2876/9588/4233/4258/84557/373156/1536/60/5292/5888/84817/5052/7128/4193/2146/195827/1545/8914/7295/3082/8737/4257/3569/2643/5155/3040/9446/2861/55829/80149/51526/1317/6778/4487/5743/128/1193/55364/3779/2944/137902/2308/51714/5536/5580/3586/4780/2176/5074/4790/3791/6415/2936…
GO CARBOHYDRATE BINDING	CARBOHYDRATE BINDING	268	0.45816	1.67715	1.48593e-05	0.000274374	0.000197292	3078	tags=31%, list=16%, signal=26%	1116/1117/3958/3122/3956/5806/3123/57124/5836/9902/23601/4017/22918/59271/5634/5352/5351/2022/2203/2990/55214/8985/497190/3099/23266/9976/140578/4885/130589/27180/811/64175/56241/81035/6515/8974/64581/10960/3101/9936/2590/2997/100049587/3965/2645/27036/4973/6320/202/2821/5066/969/89790/26270/2591/10956/6614/4125/161198/2539/7360/3964/1203/947/143903/7784/6675/6518/11227/5264/282969/971/388512/262…
GO T CELL MEDIATED IMMUNITY	T CELL MEDIATED IMMUNITY	97	0.563192	1.85796	1.49878e-05	0.000276002	0.000198463	2883	tags=39%, list=15%, signal=33%	6556/3383/567/1075/182/10945/54440/5819/3077/23180/3606/2217/5551/91543/2213/3554/5873/3134/2013/100507436/3133/5788/11118/4277/7133/7855/3569/5817/8772/54795/64005/10859/7784/563/3575/970/925/7454
GO SIGNAL TRANSDUCTION IN RESPONSE TO DNA DAMAGE	SIGNAL TRANSDUCTION IN RESPONSE TO DNA DAMAGE	132	0.522852	1.78717	1.58111e-05	0.000290071	0.000208579	2516	tags=34%, list=13%, signal=30%	972/960/1647/891/1017/2305/602/1026/6790/983/7291/5111/6591/6672/1263/200734/5347/51512/56950/399473/6615/51514/144455/1869/8444/581/995/4193/4582/161742/51499/1111/10538/11200/10459/3276/10269/4282/672/835/79733/2810/10397/4487/51065
GO MULTI ORGANISM BEHAVIOR	MULTI ORGANISM BEHAVIOR	67	-0.596566	-2.00501	1.58367e-05	0.000290071	0.000208579	2397	tags=39%, list=13%, signal=34%	1393/2055/94235/54413/130507/57680/8997/9369/1979/1602/5413/85358/1742/7349/1271/50944/2571/22941/1141/2894/9379/23542/26047/9378/1620/2902
GO PEPTIDE CROSS LINKING	PEPTIDE CROSS LINKING	33	0.730387	2.00524	1.60952e-05	0.000294018	0.000211417	592	tags=27%, list=3%, signal=26%	301/1281/633/2335/5266/2162/7057/1634/1475
GO T CELL RECEPTOR SIGNALING PATHWAY	T CELL RECEPTOR SIGNALING PATHWAY	190	0.482703	1.7086	1.63343e-05	0.00029759	0.000213986	4480	tags=41%, list=23%, signal=32%	3958/3122/3123/3115/3113/2633/3117/3127/3119/3118/80381/5696/5698/3120/11314/5819/23180/5714/64332/5701/3937/10385/9473/5788/920/11118/915/5688/5721/25865/3783/5704/5777/11006/5686/916/114625/8915/29085/84106/5692/5711/5691/8891/80149/5682/5683/5690/2533/7454/30968/11119/3635/5689/5074/5720/4790/26191/5700/5293/10213/5699/5771/5718/5684/8454/3932/5719/5685/1845/5715/7334/5708/2625/8934/5335/7535/…
GO NEGATIVE REGULATION OF RESPONSE TO EXTERNAL STIMULUS	NEGATIVE REGULATION OF RESPONSE TO EXTERNAL STIMULUS	362	0.424119	1.58075	1.66101e-05	0.00030181	0.00021702	2840	tags=27%, list=15%, signal=24%	4057/5054/302/710/9021/6696/6288/5327/7130/5328/2173/4192/6347/308/7132/5154/285/5329/55872/114769/7057/5176/11326/5627/1026/6591/25959/9111/56833/10875/11221/1843/114897/84868/2876/134/8829/6405/7056/135228/7035/29108/2213/2896/928/2/3428/8530/54/3134/284207/100507436/3133/3965/7128/29956/199/9723/5788/10371/3559/284467/89790/3082/79626/4277/29937/79594/1003/84959/79132/7133/5734/11027/54625/428…
GO REGULATION OF LEUKOCYTE MEDIATED IMMUNITY	REGULATION OF LEUKOCYTE MEDIATED IMMUNITY	196	0.482952	1.71433	1.72032e-05	0.000311757	0.000224173	3323	tags=34%, list=17%, signal=28%	3598/3162/2207/2302/684/23529/718/8673/5880/567/7037/3689/54440/11314/5819/3077/3606/2217/84868/4067/91543/7040/2213/958/2242/3554/3134/100507436/3133/3965/5788/4277/5777/2150/7133/10459/7855/388325/2268/3569/5817/3566/8772/54795/3718/84106/30817/10859/5724/7784/6850/695/6778/136/563/3575/7098/3684/7454/7409/3586/6813/8741/146850/23586/9466
GO REGULATION OF PEPTIDE HORMONE SECRETION	REGULATION OF PEPTIDE HORMONE SECRETION	207	-0.42984	-1.67088	1.73073e-05	0.000312814	0.000224932	2574	tags=28%, list=13%, signal=25%	6720/8938/776/9854/3358/775/1393/5950/6755/4760/9572/6343/10411/5071/9515/7074/5781/8997/6934/2740/91608/6804/6453/94121/5530/3799/9066/143425/114/3156/55638/777/7349/8447/8398/3747/9254/5578/5532/408/18/5581/57555/773/55636/7447/9024/111/6659/2746/952/6616/2850/11069/6833/375704/3745/3767
GO POSITIVE REGULATION OF TUMOR NECROSIS FACTOR SUPERFAMILY CYTOKINE PRODUCTION	POSITIVE REGULATION OF TUMOR NECROSIS FACTOR SUPERFAMILY CYTOKINE PRODUCTION	86	0.591176	1.91907	1.75074e-05	0.000315595	0.000226932	2818	tags=43%, list=15%, signal=37%	3315/2207/23643/7057/7305/929/1535/7291/10417/7097/54440/84868/9590/29108/1191/914/1536/64581/64135/3133/3965/942/7096/5788/8737/83786/7855/11027/4282/8772/5724/6850/4776/7474/353514/7098/9261
GO TISSUE MIGRATION	TISSUE MIGRATION	287	0.444755	1.63221	1.80431e-05	0.000324395	0.00023326	2961	tags=31%, list=15%, signal=27%	301/4223/4318/27286/7422/3315/7042/7114/3162/285/4017/7057/57381/59/3675/5176/6781/1634/1948/3689/7041/25959/7101/1969/6672/3688/5764/3725/11221/5606/5175/2876/7026/5216/8829/4233/3673/8754/811/7040/3037/1803/284/2896/958/72/6273/2050/23129/2013/2260/5872/161742/10371/1545/2821/6776/7048/25865/5547/94/1839/54345/1942/3728/161198/3964/4856/5155/11156/3690/4163/4627/54567/374969/80149/56999/5743/74…
GO REGULATION OF INSULIN SECRETION	REGULATION OF INSULIN SECRETION	175	-0.453203	-1.72806	1.83463e-05	0.000328981	0.000236558	2574	tags=39%, list=13%, signal=34%	5991/23410/3741/3667/4041/152/6422/25924/1392/57818/2182/3709/5019/150/7124/130399/2822/1080/8864/6720/8938/776/9854/775/5950/6755/4760/9572/10411/5071/9515/7074/5781/6934/2740/6804/94121/5530/3799/9066/143425/114/3156/55638/777/8447/8398/3747/9254/5578/5532/408/18/5581/57555/773/7447/9024/111/6659/2746/952/6616/2850/11069/6833/375704/3745/3767
GO POSITIVE REGULATION OF ERK1 AND ERK2 CASCADE	POSITIVE REGULATION OF ERK1 AND ERK2 CASCADE	199	0.473683	1.68577	1.86064e-05	0.000331974	0.00023871	2421	tags=26%, list=13%, signal=23%	1116/5320/10457/5322/972/960/255743/6347/5154/3383/10253/4504/54209/728/6352/6464/80310/112464/10268/3725/1490/1880/84868/8829/5028/9590/29108/7040/284/5908/1230/8685/1956/3965/2149/195827/5788/920/50507/25865/5159/4838/2150/6364/388325/4282/5155/9464/5245/6362/5031
GO REGULATION OF DENDRITIC SPINE DEVELOPMENT	REGULATION OF DENDRITIC SPINE DEVELOPMENT	75	-0.569182	-1.94575	1.86104e-05	0.000331974	0.00023871	2853	tags=45%, list=15%, signal=39%	1627/5728/4976/5649/6792/10152/115703/54413/23105/7074/5048/22871/8997/6453/7804/25791/100132074/5802/85358/9148/10611/9762/348/80725/9912/55607/9231/50944/22849/22941/5063/23316/26052/8851
GO ANTIGEN BINDING	ANTIGEN BINDING	50	0.665711	1.96655	1.88491e-05	0.000335271	0.00024108	1957	tags=38%, list=10%, signal=34%	3122/3123/3115/3113/3117/3127/3119/10417/6890/962/7040/958/3134/3133/3512/7106/3676/11027/11006
GO DEFENSE RESPONSE TO FUNGUS	DEFENSE RESPONSE TO FUNGUS	39	0.712667	2.03155	1.88933e-05	0.000335271	0.00024108	974	tags=23%, list=5%, signal=22%	4057/5919/6280/6279/57817/10417/23406/2597/84818
GO KERATINOCYTE DIFFERENTIATION	KERATINOCYTE DIFFERENTIATION	300	0.43398	1.5965	1.92942e-05	0.000341497	0.000245558	3240	tags=13%, list=17%, signal=11%	301/5266/7538/1513/182/1475/25932/1969/861/7357/6768/2355/836/3204/1514/23022/8754/826/135228/5920/54206/3858/1829/10413/4831/1594/2296/3728/865/2810/247/51384/7474/9333/9119/823/5493/3875/7421
GO ENDOTHELIAL CELL MIGRATION	ENDOTHELIAL CELL MIGRATION	200	0.48088	1.713	1.97152e-05	0.000348046	0.000250267	2750	tags=34%, list=14%, signal=29%	301/4223/27286/7422/3315/7114/3162/285/4017/7057/57381/5176/6781/1634/1948/3689/7041/7101/1969/6672/3688/5764/5606/5175/2876/7026/8829/4233/811/7040/1803/284/2896/958/6273/2050/23129/2013/2260/5872/161742/1545/2821/6776/25865/5547/94/54345/1942/3728/161198/3964/4856/5155/11156/3690/4627/54567/374969/80149/56999/5743/7474/2191/7046/51564/9270/7857
GO MITOTIC METAPHASE PLATE CONGRESSION	MITOTIC METAPHASE PLATE CONGRESSION	44	0.688586	1.99402	2.04901e-05	0.000360794	0.000259433	2844	tags=36%, list=15%, signal=31%	84722/891/55143/11004/10403/83540/3833/81930/113130/79998/1062/27243/9928/81620/91272/23636
GO REGULATION OF CELL MORPHOGENESIS INVOLVED IN DIFFERENTIATION	REGULATION OF CELL MORPHOGENESIS INVOLVED IN DIFFERENTIATION	301	-0.393774	-1.57794	2.06533e-05	0.000362734	0.000260828	2331	tags=33%, list=12%, signal=30%	2803/2932/84446/5649/2039/253725/6792/10716/10152/6091/1630/115703/54413/26039/1793/23105/7074/57520/1949/2909/7473/5048/4916/57698/22871/23189/659/118813/6900/8997/5364/11141/23053/22906/10507/23043/9839/7804/51199/3397/25791/5530/10500/10509/8874/8831/2258/5802/9693/55079/85358/26012/5881/23072/10611/9762/56920/348/4168/57715/80725/23077/5365/9912/64218/22902/85442/223117/10439/10090/57689/5560…
GO REGULATION OF MYELOID CELL DIFFERENTIATION	REGULATION OF MYELOID CELL DIFFERENTIATION	245	0.454974	1.64937	2.11253e-05	0.000370071	0.000266104	2684	tags=29%, list=14%, signal=25%	4057/3958/972/3202/4015/3976/760/9636/7057/7305/10398/54209/714/7538/182/1051/3148/3725/861/6772/6688/3059/3204/2353/3665/2124/4067/3020/3065/7040/9398/2242/3304/338382/7071/1230/841/8365/920/1021/8294/85477/55170/10272/51176/4831/4343/8737/84959/8353/3276/4211/11006/54892/1441/6988/10221/8772/6774/4830/169200/8357/10859/865/10234/3218/116151/3071/3205/7098
GO NEURON CELL CELL ADHESION	NEURON CELL CELL ADHESION	16	-0.838347	-2.04154	2.29136e-05	0.000400372	0.000287892	2535	tags=75%, list=13%, signal=65%	152330/54413/22871/9369/460/5979/57555/4685/9379/9378/8851/7143
GO GLUTAMATE RECEPTOR ACTIVITY	GLUTAMATE RECEPTOR ACTIVITY	27	-0.756243	-2.04718	2.31217e-05	0.000402978	0.000289766	2477	tags=67%, list=13%, signal=58%	2912/2906/2915/2903/2911/2904/2913/2905/2900/2895/2892/2894/116443/2890/2898/2893/2891/2902
GO POSITIVE REGULATION OF INFLAMMATORY RESPONSE	POSITIVE REGULATION OF INFLAMMATORY RESPONSE	136	0.522601	1.78605	2.40553e-05	0.000417291	0.000300058	2684	tags=32%, list=14%, signal=28%	5054/6280/5320/4192/9180/6279/7132/2207/718/4615/8840/8673/54209/1075/1051/1268/7097/3606/3673/84818/4258/63940/8692/2896/64332/64581/1956/3133/8717/1050/5008/284467/5734/3569/115362/7784/695/136/5743/7474/353514/7052/6223/7098
GO PROTEIN ACTIVATION CASCADE	PROTEIN ACTIVATION CASCADE	27	0.777622	2.06535	2.40651e-05	0.000417291	0.000300058	1764	tags=30%, list=9%, signal=27%	710/2152/2162/2192/7450/7035/2/5547
GO REGULATION OF CHROMOSOME SEPARATION	REGULATION OF CHROMOSOME SEPARATION	61	0.629311	1.93381	2.41411e-05	0.00041755	0.000300244	2773	tags=39%, list=14%, signal=34%	991/9232/891/10783/9212/9787/10460/10403/699/5347/1843/1063/990/701/9319/7272/4085/9700/1062/10459/81620/51529/26271/286053
GO NEGATIVE REGULATION OF LEUKOCYTE DIFFERENTIATION	NEGATIVE REGULATION OF LEUKOCYTE DIFFERENTIATION	100	0.565062	1.87425	2.42888e-05	0.000419042	0.000301317	2471	tags=34%, list=13%, signal=30%	301/4057/972/4192/28959/2302/55365/714/8651/10875/3659/861/3204/84695/4067/2213/1021/10272/4831/2737/864/84959/2064/11006/51043/3566/6988/10221/4830/3718/10859/80149/865/10234
GO GLAND DEVELOPMENT	GLAND DEVELOPMENT	433	0.401912	1.51223	2.46221e-05	0.000423723	0.000304683	3023	tags=27%, list=16%, signal=23%	301/4478/3488/7422/7042/4192/857/3371/3202/3162/5154/7298/8835/9133/5104/3235/5176/1482/57817/706/3239/6790/2487/3213/4939/8862/5111/6591/57045/1051/1969/9104/5021/5764/3725/205/3099/3077/128239/3200/2876/5307/445/998/6195/8829/4233/3673/7040/144455/81606/29842/581/23440/1956/23129/3280/2260/7128/6909/2119/6608/2030/2146/1050/79971/3481/10371/10272/5315/51176/84876/79084/8543/10370/6776/7048/5066…
GO RESPONSE TO INTERFERON BETA	RESPONSE TO INTERFERON BETA	30	0.755371	2.03073	2.50473e-05	0.00042891	0.000308413	2843	tags=53%, list=15%, signal=45%	10410/5359/684/10581/3659/6772/8519/3428/55337/54739/340061/9641/4332/117854/7098/51079
GO POSITIVE REGULATION OF LEUKOCYTE CHEMOTAXIS	POSITIVE REGULATION OF LEUKOCYTE CHEMOTAXIS	87	0.578654	1.87971	2.50598e-05	0.00042891	0.000308413	4051	tags=46%, list=21%, signal=36%	5054/5919/3627/7422/972/4192/3576/9547/7057/728/6352/5880/23075/7060/5764/811/196527/63940/1230/719/3965/199/2150/3569/79647/3071/7474/8740/5641/2358/708/6354/2621/5879/3579/729230/284114/7423/51157/8291
GO SNARE BINDING	SNARE BINDING	108	-0.514684	-1.86093	2.51118e-05	0.00042891	0.000308413	2928	tags=36%, list=15%, signal=31%	25/143187/51760/23208/114088/6293/8938/9751/9515/440279/134957/6804/9632/6861/84258/9066/203062/143425/6622/55638/132204/8447/6844/148281/1612/112476/63908/57586/773/6857/6812/6855/6860/6616/112755/23025/10815/10814/9892
GO PROTEIN COMPLEX INVOLVED IN CELL ADHESION	PROTEIN COMPLEX INVOLVED IN CELL ADHESION	34	0.724553	1.9966	2.51877e-05	0.000429133	0.000308573	4238	tags=71%, list=22%, signal=55%	255743/3678/11117/3679/3675/3691/3689/3688/3673/4067/3696/3672/3693/3676/3690/3683/3685/3684/3687/8515/9358/3655/3682/22801
GO ELECTRON TRANSFER ACTIVITY	ELECTRON TRANSFER ACTIVITY	106	0.547958	1.84022	2.56363e-05	0.00043569	0.000313288	3920	tags=45%, list=20%, signal=36%	4129/4017/1535/56901/2745/83442/1728/84419/1536/4688/8974/440567/653361/50507/27089/1340/54205/316/1349/1346/9249/10975/51022/4697/7386/6392/7388/6390/128/8560/1329/5447/1337/29796/3620/8574/9377/84701/231/2936/2230/112812/1351/1588/23498/55967/10327/1347
GO REGULATION OF AXONOGENESIS	REGULATION OF AXONOGENESIS	184	-0.446629	-1.70426	2.5792e-05	0.000437247	0.000314408	3126	tags=40%, list=16%, signal=34%	23499/2664/5747/9706/29882/25/57643/1627/57688/57556/5728/57611/2803/2932/84446/6792/10716/6091/1630/23105/7074/1949/2909/7473/5048/4916/57698/659/118813/6900/5364/23053/22906/10507/9839/51199/10500/10509/8831/2258/5802/55079/56920/348/4168/57715/23077/5365/64218/22902/223117/10439/10090/57689/5979/65078/8153/4747/4099/4038/5063/9024/4133/1826/4974/84894/114798/4137/10501/8851/3897/4915/2902/7143
GO IMMUNE RECEPTOR ACTIVITY	IMMUNE RECEPTOR ACTIVITY	126	0.526792	1.79748	2.61406e-05	0.000442061	0.000317869	3323	tags=33%, list=17%, signal=28%	3122/3598/3113/972/960/2152/9180/3117/3119/2207/3111/3118/3556/7852/728/3460/3120/3597/84818/2213/3140/3588/1230/719/3554/3561/1234/920/3559/3587/1441/3566/10859/10288/3575/7850/9034/3560/57007/53832/1439/9466
GO COPII COATED ER TO GOLGI TRANSPORT VESICLE	COPII COATED ER TO GOLGI TRANSPORT VESICLE	87	0.578251	1.8784	2.64143e-05	0.000445587	0.000320405	3229	tags=45%, list=17%, signal=37%	3122/3123/3115/3113/972/3117/5265/3127/3119/3118/567/1075/1522/3120/9871/54732/10960/2348/3134/3133/50999/10959/9554/149111/57222/222068/51614/10972/90411/90522/374/113419/553115/3998/23423/51014/81562/81555/11018
GO REGULATION OF MYELOID LEUKOCYTE DIFFERENTIATION	REGULATION OF MYELOID LEUKOCYTE DIFFERENTIATION	116	0.524794	1.77463	2.6813e-05	0.000451199	0.00032444	2471	tags=32%, list=13%, signal=28%	4057/972/3976/760/7305/54209/714/1051/3725/861/3059/3204/2353/3665/2124/4067/7040/9398/2242/7071/1230/841/920/1021/10272/51176/4831/8737/84959/11006/6988/10221/8772/4830/169200/10859/10234
GO INTRASPECIES INTERACTION BETWEEN ORGANISMS	INTRASPECIES INTERACTION BETWEEN ORGANISMS	52	-0.617687	-1.98874	2.6949e-05	0.000452359	0.000325274	2318	tags=42%, list=12%, signal=37%	2055/94235/54413/57680/8997/9369/1979/5413/85358/1742/7349/50944/2571/22941/1141/2894/9379/23542/26047/9378/1620/2902
GO POST TRANSLATIONAL PROTEIN MODIFICATION	POST TRANSLATIONAL PROTEIN MODIFICATION	361	0.409264	1.52492	2.70144e-05	0.000452359	0.000325274	4171	tags=33%, list=22%, signal=26%	7076/9021/3486/6696/3956/3488/11167/3371/2335/5265/115290/3915/3490/3912/56975/1356/8835/718/813/3491/2519/83987/3487/64856/1471/5696/8542/11098/5698/54587/4052/3913/25870/4924/6383/114907/5034/5714/64175/7425/51246/10130/51514/122769/9820/5701/56929/1154/5872/26272/1643/10272/5688/5721/26270/5704/84261/3569/5686/285362/3703/10970/23682/7184/6502/5692/5711/5691/23463/157570/4218/79075/5682/2719/5…
GO IMMUNOGLOBULIN PRODUCTION	IMMUNOGLOBULIN PRODUCTION	107	0.552084	1.8565	2.74271e-05	0.000458147	0.000329436	3414	tags=34%, list=18%, signal=28%	3598/3119/23529/7037/23075/10875/10312/54440/10673/7040/2213/958/9156/2590/202309/3133/5788/2821/10538/10459/115004/3569/3566/7374/4189/7293/695/6778/3575/25939/2067/3586/8741/9466/29802/7009
GO REGULATION OF B CELL ACTIVATION	REGULATION OF B CELL ACTIVATION	119	0.536816	1.8186	2.76133e-05	0.000460131	0.000330863	3396	tags=38%, list=18%, signal=31%	4323/972/2302/23529/10451/7305/1026/7037/196/56833/54440/11314/1880/10673/836/678/4067/7040/2213/958/7128/5788/683/64092/8660/5777/10459/3569/150372/4282/51293/7293/6850/695/6778/4332/3071/4773/3635/3586/8741/5074/3574/9466/677
GO ENDOCYTIC VESICLE	ENDOCYTIC VESICLE	293	0.438701	1.61032	2.8112e-05	0.000467302	0.000336019	2582	tags=29%, list=13%, signal=26%	4057/7431/3122/6288/83871/9332/3123/3115/3113/972/857/10981/3117/3127/3119/4481/7791/3118/6556/8673/1535/5880/567/81622/10312/7097/3240/1175/3120/6890/3043/3039/998/2535/811/2209/81035/1803/2923/8692/928/1536/4688/338382/533/8685/1902/1956/3134/3133/4193/7096/4689/5872/6608/817/653361/79971/4641/84329/8877/23166/7314/8992/9341/55647/10578/3693/9554/1839/7855/388325/71/4643/83547/2319/3040/23682/7…
GO COMPLEX OF COLLAGEN TRIMERS	COMPLEX OF COLLAGEN TRIMERS	21	0.808246	2.01745	2.83649e-05	0.000470362	0.000338219	1314	tags=52%, list=7%, signal=49%	1282/1281/1284/1277/1278/1290/4060/1289/1295/50509/8685
GO RESPONSE TO METAL ION	RESPONSE TO METAL ION	361	0.408924	1.52366	2.88274e-05	0.000476874	0.000342902	2716	tags=25%, list=14%, signal=22%	3485/4318/358/4129/241/857/6649/6279/891/4499/3162/308/4982/4017/760/6284/8826/7057/6382/3383/712/929/4493/140576/1261/5176/4504/57817/706/1800/567/8836/983/5111/2203/25932/4502/10312/3726/3725/1894/1843/79901/3077/1841/1728/836/2353/4489/1019/445/29957/8754/811/3309/57103/84557/30061/1536/366/1956/4193/387758/6263/841/817/653361/1050/10272/84329/5066/4496/4495/5499/144402/2539/64924/5311/85365/2…
GO REGULATION OF MONONUCLEAR CELL MIGRATION	REGULATION OF MONONUCLEAR CELL MIGRATION	45	0.683813	1.9827	2.91665e-05	0.000481318	0.000346098	1490	tags=36%, list=8%, signal=33%	5054/5919/3958/3627/4192/7057/728/6352/80310/56833/1843/4067/196527/1230/719/199
GO REGULATION OF POSTSYNAPTIC MEMBRANE NEUROTRANSMITTER RECEPTOR LEVELS	REGULATION OF POSTSYNAPTIC MEMBRANE NEUROTRANSMITTER RECEPTOR LEVELS	68	-0.576269	-1.93796	2.93559e-05	0.000483276	0.000347505	1821	tags=41%, list=10%, signal=37%	1759/10243/388336/56850/3208/163/59284/1741/59283/55227/1742/84896/64854/9912/5602/10368/5590/50632/1740/27092/23732/53616/6616/26052/112755/10369/4983/10815
GO CELL MATRIX ADHESION	CELL MATRIX ADHESION	220	0.457899	1.64504	2.99153e-05	0.000491301	0.000353276	2507	tags=29%, list=13%, signal=25%	5054/10631/1281/7422/5328/4323/960/6281/2335/87/255743/7205/11117/10516/7791/3679/967/6385/8826/7057/3675/1842/3691/182/3689/3688/5175/1490/50509/3204/8829/3673/29984/4811/8754/4059/22795/2013/3672/10395/9723/1021/6548/683/3987/3693/94/54749/3676/7059/6614/3728/916/84962/3690/64098/2042/3683/1307/947/7412/56999/3685
GO CLATHRIN BINDING	CLATHRIN BINDING	57	-0.609865	-1.99027	3.0081e-05	0.000492837	0.000354381	2818	tags=40%, list=15%, signal=35%	51760/3092/23208/8218/60682/274/6861/84258/163/9066/143425/92737/148281/9829/408/146691/50632/57586/6857/6860/9026/9892/51617
GO DNA DAMAGE RESPONSE SIGNAL TRANSDUCTION BY P53 CLASS MEDIATOR	DNA DAMAGE RESPONSE SIGNAL TRANSDUCTION BY P53 CLASS MEDIATOR	107	0.551156	1.85338	3.05488e-05	0.000499305	0.000359031	2516	tags=38%, list=13%, signal=33%	972/960/1647/891/1017/2305/602/1026/6790/983/7291/5111/6591/6672/1263/200734/51512/56950/399473/6615/144455/1869/8444/581/995/4193/4582/161742/51499/10538/11200/3276/10269/4282/672/835/79733/2810/10397/4487/51065
GO CHEMOKINE PRODUCTION	CHEMOKINE PRODUCTION	85	0.577179	1.86694	3.22618e-05	0.000525494	0.000377863	3743	tags=40%, list=20%, signal=32%	10631/6280/972/6279/3162/1958/54209/7291/6591/1969/7097/3606/84868/29108/64581/3965/199/79594/2150/3569/4282/3566/6850/247/136/7474/7098/3586/3574/6372/51284/3553/384/2950
GO NEGATIVE REGULATION OF COAGULATION	NEGATIVE REGULATION OF COAGULATION	54	0.645554	1.9283	3.23049e-05	0.000525494	0.000377863	2309	tags=35%, list=12%, signal=31%	5054/302/710/5327/5328/308/5154/5329/7057/5627/10544/114897/7056/7035/928/84959/5155/10019/947
GO RESPONSE TO INTERLEUKIN 1	RESPONSE TO INTERLEUKIN 1	200	0.47616	1.69618	3.29884e-05	0.000535336	0.00038494	4295	tags=39%, list=22%, signal=31%	1116/301/2633/3576/6347/3556/2634/3383/4615/1958/1535/4435/6352/5696/5698/2635/1051/5714/7035/9590/29108/3037/8692/958/3656/5701/3554/3965/5688/5721/7314/5704/11173/6364/3569/5686/51135/5692/5711/5691/6362/80149/3557/5682/7444/8878/5683/7850/5690/1326/6662/5689/10010/5720/4790/10392/5700/10213/5699/3552/3553/5718/7316/5684/166/6354/3654/7311/8454/8564/6355/5719/5685/6880/5715/7334/10344/5708
GO ZYMOGEN ACTIVATION	ZYMOGEN ACTIVATION	54	0.644896	1.92634	3.32913e-05	0.000538972	0.000387555	1714	tags=28%, list=9%, signal=25%	5054/302/715/5327/5328/4323/51279/7057/1522/5230/29108/3428/841/2023/578
GO LIGAND GATED ANION CHANNEL ACTIVITY	LIGAND GATED ANION CHANNEL ACTIVITY	19	-0.816317	-2.0507	3.40604e-05	0.00055012	0.00039557	1549	tags=58%, list=8%, signal=53%	2560/2743/2558/2561/8001/2554/57030/2566/2565/2556/2562
GO REGULATION OF CYTOKINE PRODUCTION INVOLVED IN IMMUNE RESPONSE	REGULATION OF CYTOKINE PRODUCTION INVOLVED IN IMMUNE RESPONSE	86	0.582136	1.88973	3.43346e-05	0.000553241	0.000397815	2684	tags=37%, list=14%, signal=32%	972/7042/3162/2207/684/567/10417/8764/54440/3077/3606/91543/7040/284/3554/3134/3133/2150/7133/7855/388325/7043/3569/4282/8915/54795/3718/10859/695/117854/7474/7098
GO INTERLEUKIN 1 BETA PRODUCTION	INTERLEUKIN 1 BETA PRODUCTION	89	0.5687	1.86249	3.50084e-05	0.000562771	0.000404667	3743	tags=40%, list=20%, signal=33%	3315/114769/7305/1903/1958/54209/79792/834/1992/29108/54206/3140/64581/3428/54/3965/7128/841/2149/2150/7855/11027/115362/80149/4332/7474/353514/945/51311/113277/80772/10392/3553/384/948/2950
GO CALCIUM DEPENDENT PHOSPHOLIPASE A2 ACTIVITY	CALCIUM DEPENDENT PHOSPHOLIPASE A2 ACTIVITY	15	0.851589	1.95067	3.56615e-05	0.000571923	0.000411248	883	tags=20%, list=5%, signal=19%	5320/5322/5321
GO INHIBITORY POSTSYNAPTIC POTENTIAL	INHIBITORY POSTSYNAPTIC POTENTIAL	17	-0.815737	-2.00334	3.63466e-05	0.000581546	0.000418167	1980	tags=59%, list=10%, signal=53%	54413/22999/22997/388135/18/57555/9699/1137/2898/2562
GO GUANYL NUCLEOTIDE EXCHANGE FACTOR ACTIVITY	GUANYL NUCLEOTIDE EXCHANGE FACTOR ACTIVITY	216	-0.41176	-1.60083	3.66512e-05	0.000585049	0.000420686	3443	tags=33%, list=18%, signal=28%	10564/10160/55667/115557/57139/23365/6654/5900/5866/81846/10125/2245/1936/23348/80243/389337/23096/9826/23268/23362/55103/23263/10411/126003/1793/55160/7074/29/89781/6655/8997/8924/6453/25791/9649/54453/8874/5924/9771/9693/160518/23258/26030/23101/8729/55619/83874/23229/4168/6305/8925/23077/9828/64805/85442/50649/8567/51195/9267/84249/57189/117177/1795/613/9844/440073/255426/5923/57221/10276/1106…
GO CELLULAR RESPONSE TO AMMONIUM ION	CELLULAR RESPONSE TO AMMONIUM ION	133	-0.47835	-1.78097	3.78256e-05	0.000602387	0.000433154	1549	tags=21%, list=8%, signal=19%	2560/3397/84687/5999/5064/114/57657/3350/2561/3747/3356/1132/50632/2554/8787/1141/1137/111/23236/4062/1128/2775/2774/11255/8851/2566/2562/51617
GO MITOTIC CELL CYCLE CHECKPOINT	MITOTIC CELL CYCLE CHECKPOINT	164	0.494358	1.72273	3.87789e-05	0.000614705	0.000442011	3001	tags=34%, list=16%, signal=29%	991/1647/891/7465/7153/1017/9212/1026/6790/983/5111/10403/699/1263/5347/51512/1843/1063/51776/990/701/9319/7272/7040/4998/144455/1869/4085/581/995/4193/4582/55055/641/51499/11200/11130/10459/3276/63967/81620/672/835/79733/6118/3364/2810/51065/9735/146956/64858/54962/29980/60561/79858
GO REGULATION OF REACTIVE OXYGEN SPECIES METABOLIC PROCESS	REGULATION OF REACTIVE OXYGEN SPECIES METABOLIC PROCESS	178	0.477039	1.67075	3.87789e-05	0.000614705	0.000442011	3896	tags=42%, list=20%, signal=34%	5806/1647/857/10516/7057/3383/7305/4504/706/2305/1535/5880/1026/3689/9263/9104/2717/3240/3099/3043/445/140823/57103/7040/1191/64581/54/1956/5165/5873/378/199/50507/1545/683/7048/5159/5547/8737/2150/2643/2539/5155/6774/5311/672/947/2773/55829/80149/6850/255027/5743/215/3684/4358/2308/113277/5580/3586/4780/5025/3692/225/387/7157/7416/3553/2358/384/948/2950/1719/5879/11035
GO SIGNAL TRANSDUCTION INVOLVED IN CELLULAR RESPONSE TO AMMONIUM ION	SIGNAL TRANSDUCTION INVOLVED IN CELLULAR RESPONSE TO AMMONIUM ION	97	-0.524934	-1.88122	4.06271e-05	0.00064251	0.000462005	1374	tags=19%, list=7%, signal=17%	5999/5064/3350/3356/1132/50632/8787/1141/1137/111/23236/4062/1128/2775/2774/11255/8851/51617
GO NEGATIVE REGULATION OF NEURON DIFFERENTIATION	NEGATIVE REGULATION OF NEURON DIFFERENTIATION	220	-0.415048	-1.615	4.24471e-05	0.000669743	0.000481587	2535	tags=34%, list=13%, signal=30%	152330/5087/10363/4821/57801/7025/2932/56478/1656/23108/1809/10220/1630/6657/54413/7068/23105/1949/7473/5048/22871/23189/146760/6900/22891/22876/10507/3397/25791/5530/10500/10509/8831/7248/2258/5802/9693/1400/55079/23258/349667/57534/56920/429/3400/4851/348/4168/57715/64218/22902/223117/23462/1910/22882/6695/6658/65078/4099/4038/11075/4133/952/4974/84894/388585/57540/10501/26052/112755/8851/10215…
GO LYMPHOCYTE DIFFERENTIATION	LYMPHOCYTE DIFFERENTIATION	351	0.412519	1.53323	4.40284e-05	0.000692158	0.000497705	3451	tags=30%, list=18%, signal=25%	301/3956/4323/972/4192/2207/2302/23529/3111/1958/602/8651/10945/56833/10875/10312/8324/3688/3659/11221/54440/861/6688/3606/1880/84695/678/91543/2213/914/5971/64332/581/3965/10385/942/5788/920/1021/1316/915/51176/4860/3559/10538/7048/2737/27166/578/112616/80758/864/5777/2064/7855/3676/5734/3569/11006/150372/916/51043/4242/54567/3566/2177/8772/6774/3718/6932/10288/80149/4189/7412/865/6850/695/6778/…
GO POSITIVE REGULATION OF PRODUCTION OF MOLECULAR MEDIATOR OF IMMUNE RESPONSE	POSITIVE REGULATION OF PRODUCTION OF MOLECULAR MEDIATOR OF IMMUNE RESPONSE	97	0.547416	1.80591	4.40704e-05	0.000692158	0.000497705	2581	tags=31%, list=13%, signal=27%	972/2207/23529/567/7037/10417/8764/54440/3606/91543/7040/958/3554/3134/3133/5788/2821/2150/10459/7855/388325/3569/4282/3566/8915/10859/7293/6778/117854/7474
GO SYNTAXIN 1 BINDING	SYNTAXIN 1 BINDING	26	-0.747027	-2.00309	4.45364e-05	0.000697873	0.000501814	1727	tags=62%, list=9%, signal=56%	9751/440279/134957/55638/132204/6844/1612/112476/6857/6812/6855/6860/6616/23025/10815/10814
GO PLACENTA DEVELOPMENT	PLACENTA DEVELOPMENT	153	0.4967	1.72306	4.49667e-05	0.000703004	0.000505503	3413	tags=33%, list=18%, signal=28%	9021/6696/133/3976/3491/8061/283/6781/4435/1634/7262/2706/1051/3726/1508/5764/6768/8728/7026/6615/144455/9820/1956/3696/3280/841/1050/3481/51176/10959/4838/1594/7855/5155/55224/5311/10733/79733/5743/2697/6692/51294/682/3586/7421/899/9394/10049/639/677/4693
GO LYSOSOMAL LUMEN	LYSOSOMAL LUMEN	95	0.550377	1.81467	4.59366e-05	0.000716527	0.000515227	4025	tags=57%, list=21%, signal=45%	2331/633/972/4060/6385/6382/10577/3339/1513/3074/1634/1520/2990/2799/1508/2717/2517/1514/6383/2720/5476/2817/1509/5159/54749/4125/8635/2239/4758/410/5538/2719/10082/27163/2588/1464/6448/3073/3920/6948/6609/10437/2629/2581/2992/4969/53/5641/66005/81567/4669/23324/1200/8029
GO REGULATION OF CYSTEINE TYPE ENDOPEPTIDASE ACTIVITY	REGULATION OF CYSTEINE TYPE ENDOPEPTIDASE ACTIVITY	232	0.457244	1.64745	4.64577e-05	0.000723005	0.000519885	2543	tags=28%, list=13%, signal=25%	4057/4318/358/6280/7422/960/2152/332/6279/2537/4804/5329/3491/114769/7057/4504/837/1800/834/5698/355/83596/1490/1611/2876/6195/29108/831/64581/3428/10542/8530/581/8717/3965/8795/4193/841/2149/1509/10395/51499/400410/51176/8743/330/54205/3082/4838/578/80758/8737/79594/5978/9141/8915/8772/55081/10134/8996/3336/2810/6850/51065/25816/5743
GO REGULATION OF SHORT TERM NEURONAL SYNAPTIC PLASTICITY	REGULATION OF SHORT TERM NEURONAL SYNAPTIC PLASTICITY	15	-0.852122	-2.05162	4.7483e-05	0.000737282	0.000530151	1520	tags=73%, list=8%, signal=68%	388336/57282/8541/9145/5864/6855/6860/2898/6543/23025/729956
GO POSITIVE REGULATION OF INTERLEUKIN 8 PRODUCTION	POSITIVE REGULATION OF INTERLEUKIN 8 PRODUCTION	49	0.655937	1.9303	4.88509e-05	0.000756801	0.000544187	3677	tags=57%, list=19%, signal=46%	5054/972/965/4615/929/7097/1649/29108/8692/914/64581/3304/3965/7096/2149/25865/8737/2150/8915/8772/6850/7474/7098/51311/23586/51284/3553/3303
GO BLOOD VESSEL ENDOTHELIAL CELL MIGRATION	BLOOD VESSEL ENDOTHELIAL CELL MIGRATION	112	0.532107	1.79961	4.98225e-05	0.000770107	0.000553755	2150	tags=31%, list=11%, signal=28%	301/4223/27286/7422/3315/7114/3162/285/7057/57381/1948/7101/1969/3688/5606/2876/8829/7040/284/958/2050/2013/2260/161742/6776/25865/5547/94/54345/1942/3728/161198/5155/4627/54567
GO T CELL DIFFERENTIATION	T CELL DIFFERENTIATION	238	0.446142	1.61278	4.99732e-05	0.000770693	0.000554176	3451	tags=35%, list=18%, signal=29%	301/972/4192/2207/2302/3111/1958/602/8651/10945/10875/10312/8324/3659/11221/54440/861/3606/1880/84695/678/91543/914/5971/64332/3965/10385/942/5788/920/1021/915/51176/4860/3559/10538/7048/2737/27166/80758/864/2064/7855/5734/3569/11006/916/51043/54567/3566/2177/8772/6774/3718/6932/10288/80149/865/6850/6778/8325/3071/3575/4773/26253/3955/925/7409/2175/3142/944/9308/57580/3574/146850/26191/5293/387/6…
GO NEGATIVE REGULATION OF ALPHA BETA T CELL ACTIVATION	NEGATIVE REGULATION OF ALPHA BETA T CELL ACTIVATION	38	0.69477	1.97215	5.03421e-05	0.000774633	0.000557009	2433	tags=47%, list=13%, signal=41%	301/8651/57045/8764/861/11314/3077/84695/3965/29126/2737/864/51043/3566/3718/10859/80149/865
GO REGULATION OF REGULATED SECRETORY PATHWAY	REGULATION OF REGULATED SECRETORY PATHWAY	157	-0.457976	-1.72977	5.19957e-05	0.00079828	0.000574013	2142	tags=41%, list=11%, signal=37%	51760/808/23208/114088/8938/2624/776/2932/783/148/84961/9515/23413/8448/29/22871/9846/28964/5217/6804/140730/64780/321/8911/8912/6861/84258/6843/9066/8573/143425/320/22999/5413/4851/8499/8447/148281/9162/3356/9783/112476/63908/57586/5582/613/5864/9699/10675/192683/6857/6812/1141/1137/8941/116443/5579/6855/6860/4878/6853/112755/10815/3745/10814
GO CELL CELL ADHESION VIA PLASMA MEMBRANE ADHESION MOLECULES	CELL CELL ADHESION VIA PLASMA MEMBRANE ADHESION MOLECULES	272	-0.392525	-1.55642	5.2446e-05	0.000803389	0.000577686	2826	tags=27%, list=15%, signal=23%	1952/57526/25930/5291/56127/56147/9080/1007/25945/152330/56101/5098/26167/27255/57575/56112/6091/27253/65125/22871/56114/5797/6900/6376/7216/56098/11141/27328/120114/23418/56106/5802/421/22997/84631/145581/1012/23284/5365/57863/8404/57689/22859/5979/10893/84966/128434/5789/4099/2895/1016/64084/1008/64405/5099/5818/1951/64101/214/4155/1826/84628/114798/28316/9378/869/3897/65217/11122/57453/92211/6…
GO INTERLEUKIN 6 PRODUCTION	INTERLEUKIN 6 PRODUCTION	147	0.504389	1.74261	5.29219e-05	0.000808864	0.000581624	3594	tags=39%, list=19%, signal=32%	972/2207/2302/3556/7305/4615/54209/1535/7291/10417/1051/7097/3606/84868/84818/29108/8692/64581/338382/4843/64135/3965/7128/7096/2149/199/3082/5777/2150/388325/3569/11027/8915/6774/5724/10288/55829/80149/3557/6850/136/3071/7474/353514/7098/9261/51311/3635/113277/3586/2629/10392/23586/9466/26191/51284/3552/3553
GO REGULATION OF POSTSYNAPSE ORGANIZATION	REGULATION OF POSTSYNAPSE ORGANIZATION	100	-0.505723	-1.81251	5.41101e-05	0.000825179	0.000593355	2853	tags=44%, list=15%, signal=38%	1627/5728/4976/57497/1399/5649/2534/6792/58504/10152/115703/54413/7074/5048/4916/22871/8997/2904/11141/388336/7804/25791/5802/85358/10611/9762/347730/348/80725/9912/26045/55607/91752/5789/2895/1607/4038/5063/23316/26052/9378/8851/869/729956
GO TERTIARY GRANULE LUMEN	TERTIARY GRANULE LUMEN	55	0.64262	1.92821	5.58513e-05	0.000849835	0.000611084	2776	tags=45%, list=15%, signal=39%	4057/4318/7130/5806/4069/79792/1520/567/1471/8836/3240/3043/1265/25797/126014/1509/124583/2495/5236/5777/1476/2919/3417/978/23191
GO SUPEROXIDE METABOLIC PROCESS	SUPEROXIDE METABOLIC PROCESS	68	0.607959	1.90921	5.60355e-05	0.000850743	0.000611737	3755	tags=51%, list=20%, signal=42%	6648/6649/10516/7305/4504/1535/3689/9104/1728/7040/1536/4688/64581/4843/54/1956/5052/4689/653361/50507/683/285590/2150/2643/2773/6850/3684/5580/4780/2176/57580/2358/948/2950/1719
GO MATERNAL PROCESS INVOLVED IN FEMALE PREGNANCY	MATERNAL PROCESS INVOLVED IN FEMALE PREGNANCY	64	0.610193	1.88517	5.66833e-05	0.00085867	0.000617437	3380	tags=45%, list=18%, signal=37%	6696/3976/285/3675/6781/2706/1268/3726/1508/5764/84868/7026/4316/3965/1829/5066/10959/4838/1594/23780/367/5743/2697/7319/5997/682/7421/231/639
GO POSITIVE REGULATION OF RESPONSE TO WOUNDING	POSITIVE REGULATION OF RESPONSE TO WOUNDING	68	0.607719	1.90846	5.701e-05	0.000861709	0.000619622	2057	tags=28%, list=11%, signal=25%	10630/301/5054/4192/2152/7057/7852/8840/50848/5764/7056/196527/2896/5341/64581/2149/7048/1839/2281
GO KINETOCHORE	KINETOCHORE	135	0.507625	1.73419	5.85065e-05	0.000882376	0.000634483	3216	tags=41%, list=17%, signal=34%	332/891/11004/79682/6990/9212/1058/147841/55355/10403/4751/699/83540/5347/220134/1063/64105/221150/701/79019/7272/79980/201161/387103/64946/23421/4085/81930/55055/55839/79023/151648/151246/54820/1062/11130/10615/5664/23157/81620/378708/8655/57405/91272/9735/57082/2491/90417/222229/54821/201254/55320/6612/79902/989
GO NEURON PROJECTION ORGANIZATION	NEURON PROJECTION ORGANIZATION	87	-0.535081	-1.89401	5.89059e-05	0.000886443	0.000637408	2302	tags=41%, list=12%, signal=37%	2932/5649/2534/10152/115703/1639/54413/7074/5048/22871/22891/8997/2904/1501/7804/25791/3480/85358/55619/1742/10611/9762/348/80725/9912/55607/91752/50944/22941/4130/5063/23316/26052/8851/2047/478
GO REGULATION OF CELL SUBSTRATE ADHESION	REGULATION OF CELL SUBSTRATE ADHESION	203	0.457789	1.634	5.93972e-05	0.000891871	0.000641311	1797	tags=23%, list=9%, signal=21%	10630/5054/10631/1277/3956/7422/5328/2633/4323/6281/4192/2335/255743/3678/285/1295/11117/3491/6385/8826/2316/7057/2192/3675/1842/5880/182/8324/5764/91663/3204/998/8829/29984/4811/811/3037/81/2013/10395/9723/1021/6548/683/4739/3987/94
GO NEGATIVE REGULATION OF CYTOKINE SECRETION	NEGATIVE REGULATION OF CYTOKINE SECRETION	65	0.596833	1.8521	6.0277e-05	0.000903098	0.000649383	3360	tags=42%, list=18%, signal=34%	301/2633/2335/7114/114769/1992/5552/2615/2213/284/7128/10385/2150/5734/284297/307/10859/947/80149/7293/353514/7850/51311/80772/3586/9466/26191
GO NEGATIVE REGULATION OF T CELL PROLIFERATION	NEGATIVE REGULATION OF T CELL PROLIFERATION	61	0.616149	1.89337	6.12571e-05	0.000915773	0.000658498	2328	tags=36%, list=12%, signal=32%	5320/10457/2302/6385/11326/57045/80380/1051/8764/2615/84868/836/3965/10385/942/29126/3559/5777/2064/51043/10859/10288
GO ANTIOXIDANT ACTIVITY	ANTIOXIDANT ACTIVITY	85	0.56713	1.83443	6.38957e-05	0.000953135	0.000685363	3949	tags=41%, list=21%, signal=33%	6280/241/6648/6649/493869/2882/4504/10549/5742/3240/3043/3039/1728/2876/9588/4258/373156/84817/5052/195827/7295/4257/3040/9446/55829/5743/1193/137902/51714/6415/2936/2950/4259/83667/3046
GO NEGATIVE REGULATION OF INNATE IMMUNE RESPONSE	NEGATIVE REGULATION OF INNATE IMMUNE RESPONSE	57	0.637104	1.93046	6.6702e-05	0.000991538	0.000712977	2803	tags=39%, list=15%, signal=33%	710/11326/9111/56833/11221/84868/2896/2/3428/3134/100507436/3133/3965/7128/79594/79132/54625/84166/10859/6223/51441/25939
GO AMEBOIDAL TYPE CELL MIGRATION	AMEBOIDAL TYPE CELL MIGRATION	384	0.403381	1.50919	6.67605e-05	0.000991538	0.000712977	2750	tags=28%, list=14%, signal=24%	7076/301/4223/4318/27286/7422/3315/7042/2335/7114/3162/285/4017/6385/7057/57381/3675/5176/85360/6781/1634/1948/397/7291/286204/3689/7041/25959/7101/1969/6672/3688/5764/3725/11221/5606/5175/2876/7026/5216/8829/6405/4233/3673/8754/811/9590/7040/3037/1803/284/201161/1947/8692/2896/958/6273/2348/2050/23129/2013/2260/5872/6608/161742/9723/10487/10371/1545/2821/6776/7048/25865/4838/5547/94/1839/54345/1…
GO CELL CYCLE CHECKPOINT	CELL CYCLE CHECKPOINT	216	0.456509	1.6385	6.76792e-05	0.00100228	0.000720701	3001	tags=30%, list=16%, signal=25%	991/1647/891/7465/7153/1017/9212/1026/6790/983/5111/10403/8318/699/1263/5347/51512/1843/1063/51776/990/701/9319/7272/7040/51514/4998/144455/1869/4085/581/79968/995/3014/4193/4582/55055/641/51499/26272/1111/8914/11200/26270/11130/10459/3276/63967/81620/672/835/79733/6118/3364/2810/51065/9735/146956/64858/54962/29980/83990/60561/79858
GO REGULATION OF VIRAL ENTRY INTO HOST CELL	REGULATION OF VIRAL ENTRY INTO HOST CELL	29	0.735009	1.96405	6.77771e-05	0.00100228	0.000720701	2716	tags=52%, list=14%, signal=44%	3956/5806/972/10410/10581/6737/5819/5034/85363/8519/3965/920/10475/8724/2934
GO EMBRYONIC ORGAN DEVELOPMENT	EMBRYONIC ORGAN DEVELOPMENT	432	0.394218	1.4832	6.88714e-05	0.00101626	0.000730756	3439	tags=30%, list=18%, signal=25%	5919/9021/133/7422/4323/7042/3576/3202/115908/3976/5154/6474/157506/3491/8463/2202/2019/3212/10253/3217/3235/3236/1482/4435/2487/7262/55584/3213/3201/7291/2022/286204/3221/8323/1051/1969/3726/4237/27173/6768/3200/3204/7026/6615/2535/3199/7040/5013/144455/3225/3214/2348/1956/3280/2260/6909/2020/7545/841/3203/6608/1050/3481/10413/51176/10370/9620/6491/7048/2737/10959/4838/10265/6913/3198/2048/2296/…
GO REGULATION OF APOPTOTIC SIGNALING PATHWAY	REGULATION OF APOPTOTIC SIGNALING PATHWAY	397	0.403465	1.51365	6.93154e-05	0.00102061	0.000733882	4215	tags=37%, list=22%, signal=30%	5054/51330/3958/4318/6280/50486/6648/3315/972/960/857/6279/3162/64114/2537/5329/467/7057/3383/2139/10449/1075/355/8531/83596/6591/3148/6672/4000/162989/2876/4055/1649/6615/8829/5034/3065/29108/2070/2923/8692/1191/1869/51060/3304/581/8717/2260/3965/7128/8795/90993/4193/400916/841/4582/2730/2023/5788/51499/8406/10413/8743/7314/220042/3082/27166/578/80758/5499/8737/624/79594/9141/1495/4282/79156/718…
GO METENCEPHALON DEVELOPMENT	METENCEPHALON DEVELOPMENT	109	-0.49581	-1.79648	6.96757e-05	0.00102371	0.00073611	3399	tags=46%, list=18%, signal=38%	23513/93986/4204/6753/596/1152/23287/58155/473/5629/25/65250/8455/1399/4760/4040/4761/2637/5270/8648/5781/22891/16/146057/4628/5802/2648/8861/429/3746/51286/8925/23026/85442/18/64211/2895/124925/8941/8851/1272/869/23017/6751/4983/6752/6712/2902/28514/23544
GO ASSOCIATIVE LEARNING	ASSOCIATIVE LEARNING	76	-0.545243	-1.86805	6.98492e-05	0.00102406	0.00073636	2372	tags=39%, list=12%, signal=35%	23259/2055/84446/5649/5153/10716/4761/2903/54413/4212/3815/8831/3156/2558/4763/7349/10522/477/338811/65009/81832/885/4900/50944/4130/1141/41/6616/2902/7143
GO ICOSANOID METABOLIC PROCESS	ICOSANOID METABOLIC PROCESS	109	0.528007	1.77862	7.07759e-05	0.00103542	0.000744531	2818	tags=25%, list=15%, signal=21%	301/2171/241/5322/972/7132/873/1800/5742/7097/240/5321/2876/4258/22949/2687/1545/4282/6916/29785/6850/247/5743/57834/2053/9536/9261
GO TRANSITION METAL ION HOMEOSTASIS	TRANSITION METAL ION HOMEOSTASIS	129	0.507051	1.73094	7.16862e-05	0.0010465	0.000752495	1794	tags=20%, list=9%, signal=18%	4057/55240/6280/6279/4499/3162/1356/6556/2512/4493/4504/57817/567/7037/26872/4502/79901/3077/4489/64116/8692/30061/148867/4496/4495/2495
GO POSITIVE REGULATION OF CALCIUM ION DEPENDENT EXOCYTOSIS	POSITIVE REGULATION OF CALCIUM ION DEPENDENT EXOCYTOSIS	19	-0.806196	-2.02527	7.2118e-05	0.00105055	0.000755414	1599	tags=63%, list=8%, signal=58%	6804/8911/8912/9066/143425/8447/192683/6857/6812/8941/6860/3745
GO REGULATION OF DNA TEMPLATED TRANSCRIPTION IN RESPONSE TO STRESS	REGULATION OF DNA TEMPLATED TRANSCRIPTION IN RESPONSE TO STRESS	123	0.516729	1.76418	7.31856e-05	0.00106384	0.000764966	4295	tags=46%, list=22%, signal=36%	7422/768/3162/56892/467/1958/4504/5696/5698/1051/3725/3337/1649/6195/5714/3309/5701/90993/4582/1111/5688/10370/5721/7314/5704/5686/5692/5711/5691/10636/5682/55364/5683/5690/8994/5689/6197/6921/4780/5720/5700/7009/7157/10213/5699/5718/7316/3303/5684/83667/7311/25994/5719/5685/112398/5715/5708
GO MEMBRANE DISRUPTION IN OTHER ORGANISM	MEMBRANE DISRUPTION IN OTHER ORGANISM	11	0.894056	1.91937	7.35766e-05	0.00106725	0.00076742	457	tags=18%, list=2%, signal=18%	4057/79792
GO FICOLIN 1 RICH GRANULE MEMBRANE	FICOLIN 1 RICH GRANULE MEMBRANE	60	0.623214	1.9041	7.56988e-05	0.00109571	0.000787882	3855	tags=50%, list=20%, signal=40%	3958/965/2207/22918/6556/2357/3689/10312/11314/5269/6515/79930/100049587/5547/374395/10288/1729/1315/8655/3071/23218/3920/8987/3687/10159/387/3916/1604/2358/5879
GO ENDODERM DEVELOPMENT	ENDODERM DEVELOPMENT	75	0.581388	1.83231	7.65671e-05	0.00110388	0.00079376	1963	tags=29%, list=10%, signal=26%	1284/4318/1290/4323/2335/3915/3678/1289/3912/1295/3679/23237/4313/3689/1291/3065/1303/4838/3693/22943/3676/3227
GO ENDOSOME LUMEN	ENDOSOME LUMEN	35	0.695136	1.92549	7.65867e-05	0.00110388	0.00079376	1017	tags=23%, list=5%, signal=22%	8572/967/1513/1520/567/1508/1514/5551
GO FORMATION OF PRIMARY GERM LAYER	FORMATION OF PRIMARY GERM LAYER	116	0.510303	1.72563	7.70502e-05	0.00110823	0.000796883	2581	tags=33%, list=13%, signal=29%	1284/4318/1290/4323/2335/3678/1289/3912/1295/3679/3675/4313/2139/3691/286204/3689/57045/1291/1969/8324/3688/6615/3673/2260/79971/51176/1303/4838/3693/22943/2296/3676/3690/2132/3685/642658/2697/7474
GO CELL DIFFERENTIATION IN HINDBRAIN	CELL DIFFERENTIATION IN HINDBRAIN	19	-0.804732	-2.02159	7.72575e-05	0.00110887	0.000797348	1116	tags=53%, list=6%, signal=50%	8861/51286/8925/85442/64211/2895/869/23017/4983/9241
GO DOPAMINE TRANSPORT	DOPAMINE TRANSPORT	51	-0.631414	-2.0303	7.82628e-05	0.00112095	0.00080603	3260	tags=43%, list=17%, signal=36%	83849/1815/51760/3737/23208/65018/5071/2668/6861/84258/9066/143425/6622/148281/3356/18/57586/6857/1141/1137/6860/6623
GO GABA RECEPTOR COMPLEX	GABA RECEPTOR COMPLEX	14	-0.847234	-1.99185	7.88292e-05	0.0011267	0.000810165	1549	tags=64%, list=8%, signal=59%	2560/2558/2561/2554/2566/2565/2556/2562/9568
GO PHENOL CONTAINING COMPOUND CATABOLIC PROCESS	PHENOL CONTAINING COMPOUND CATABOLIC PROCESS	12	0.872817	1.89283	7.90439e-05	0.00112741	0.000810676	1465	tags=25%, list=8%, signal=23%	26002/4129/2184
GO CHROMOSOMAL REGION	CHROMOSOMAL REGION	347	0.411344	1.52777	7.92203e-05	0.00112757	0.000810792	3742	tags=31%, list=20%, signal=26%	332/891/55143/11004/1017/79682/6990/9212/1058/6790/983/147841/55355/5111/10403/4751/64151/4171/1051/699/6672/83540/5347/220134/1063/64105/11339/221150/6615/701/79019/7272/79980/3020/201161/387103/4998/64946/23421/4085/5888/81930/3014/113130/8365/2146/55055/641/493861/8294/4175/55839/79023/151648/4174/151246/5500/54820/1111/11200/5499/91687/4172/1062/11130/10615/4173/5424/5664/23157/81620/22955/37…
GO TRANSPORT VESICLE MEMBRANE	TRANSPORT VESICLE MEMBRANE	207	-0.414382	-1.61079	8.3106e-05	0.00118042	0.000848792	1814	tags=27%, list=9%, signal=25%	8448/55754/440279/6804/23312/9632/94121/140679/2572/22895/6861/84258/6843/9066/6653/5799/23176/246213/273/5802/143425/6622/8224/9143/132204/762/6844/148281/9899/5874/5798/6721/1363/112476/25956/9145/388662/4900/6854/5864/192683/6857/8927/2890/115827/6855/6860/57030/57221/6853/23025/55530/534/29106/1113/6456
GO POSTSYNAPTIC SPECIALIZATION ORGANIZATION	POSTSYNAPTIC SPECIALIZATION ORGANIZATION	34	-0.682297	-1.9853	8.39756e-05	0.00119029	0.000855894	1818	tags=59%, list=9%, signal=53%	4916/22871/8831/5802/85358/1741/347730/26045/57555/1740/50944/5789/2895/22941/64101/9379/84628/9378/869/4983
GO REGULATION OF CATION TRANSMEMBRANE TRANSPORT	REGULATION OF CATION TRANSMEMBRANE TRANSPORT	333	-0.369702	-1.49261	8.58194e-05	0.00121355	0.00087262	2806	tags=30%, list=15%, signal=26%	808/54800/57554/5728/3736/9722/91404/3064/776/2259/287/775/3306/729993/1393/50488/5649/2534/486/6262/65018/783/782/2903/54413/65125/57520/7220/785/22871/1908/6376/11060/2904/57165/388336/10142/28954/274/3208/1804/3799/5999/288/59284/6622/8514/7881/85358/1741/59283/23072/53822/1742/1394/3746/477/8398/6844/10105/3747/79026/1612/844/81832/4644/781/30845/10368/5581/57555/55636/1740/4747/50944/2892/37…
GO NEUROTRANSMITTER GATED ION CHANNEL CLUSTERING	NEUROTRANSMITTER GATED ION CHANNEL CLUSTERING	12	-0.853851	-1.93021	8.59719e-05	0.00121355	0.00087262	2296	tags=83%, list=12%, signal=73%	5649/22871/10243/388336/2743/85358/1742/348/375323/729956
GO CELLULAR RESPONSE TO OXYGEN LEVELS	CELLULAR RESPONSE TO OXYGEN LEVELS	222	0.453829	1.6337	8.86883e-05	0.00124932	0.000898336	4226	tags=42%, list=22%, signal=33%	358/10135/7422/114990/857/891/768/3162/29923/114769/3383/890/1958/4504/6781/10449/5696/5698/355/7291/51142/1263/4000/5764/5230/205/5034/5714/57103/6285/1869/1536/5701/1902/84709/5165/4193/2030/2023/6548/26608/5688/10370/5721/7314/5704/1978/5686/84962/5163/8996/5692/947/5711/5691/9463/10397/5682/5743/5683/3779/5690/83990/8994/5689/132864/2308/6921/4780/5720/84701/5700/677/7009/7157/10213/5699/2635…
GO REGULATION OF CELL CYCLE G1 S PHASE TRANSITION	REGULATION OF CELL CYCLE G1 S PHASE TRANSITION	164	0.48306	1.68336	9.02876e-05	0.00126923	0.000912653	3516	tags=37%, list=18%, signal=31%	301/10457/1031/1647/6347/891/56892/7465/1017/1026/6790/983/81610/5111/25959/8318/1263/9510/51512/84967/990/1019/56241/144455/1869/581/995/1956/10385/4193/4582/2146/199/1021/51499/5721/11200/8737/5777/3276/9928/5311/835/10106/79733/6118/2810/51065/5933/10263/898/1029/91607/2735/55571/989/5720/55159/7157/5925/10498
GO COMPLEMENT BINDING	COMPLEMENT BINDING	21	0.787391	1.96539	9.30669e-05	0.00130561	0.000938816	3694	tags=67%, list=19%, signal=54%	5806/22918/11326/728/3689/811/5245/721/3684/84466/629/720/966/708
GO REGULATION OF COLLAGEN METABOLIC PROCESS	REGULATION OF COLLAGEN METABOLIC PROCESS	40	0.668849	1.90303	9.47311e-05	0.00132382	0.000951908	2719	tags=48%, list=14%, signal=41%	7431/11117/4239/1471/2022/3688/1490/3673/7040/54206/90993/2149/4261/5159/7043/3569/642658/2191/5906
GO LONG TERM SYNAPTIC POTENTIATION	LONG TERM SYNAPTIC POTENTIATION	85	-0.52081	-1.83266	9.48628e-05	0.00132382	0.000951908	2783	tags=44%, list=15%, signal=37%	25/5728/793/2906/2932/5649/794/5270/2903/54413/4355/22871/11170/2904/10858/25769/114/6622/85358/4763/347730/348/2905/6844/23373/26045/55607/5590/4900/50944/22941/6547/6543/6616/4915/729956/7143
GO PHAGOCYTIC VESICLE MEMBRANE	PHAGOCYTIC VESICLE MEMBRANE	72	0.585212	1.85471	9.49461e-05	0.00132382	0.000951908	2582	tags=36%, list=13%, signal=31%	83871/10981/6556/8673/1535/5880/567/10312/7097/6890/811/1536/338382/533/3134/3133/7096/84329/8992/9341/55647/9554/83547/23682/4218/11151
GO VESICLE FUSION TO PLASMA MEMBRANE	VESICLE FUSION TO PLASMA MEMBRANE	24	-0.756568	-1.99413	9.95397e-05	0.00138504	0.000995931	1599	tags=50%, list=8%, signal=46%	6804/6843/9066/143425/112476/5864/6857/6812/6616/112755/10815/10814
GO EXOGENOUS PROTEIN BINDING	EXOGENOUS PROTEIN BINDING	74	0.575975	1.81684	0.000102466	0.00142227	0.0010227	2688	tags=41%, list=14%, signal=35%	3678/23601/3383/7852/1948/7037/983/8764/6510/1969/50848/3688/5819/3673/1803/8692/3304/290/1956/942/1234/920/3693/3690/5817/10572/79581/7293/3685/9076
GO DEVELOPMENTAL CELL GROWTH	DEVELOPMENTAL CELL GROWTH	221	-0.406892	-1.58042	0.000102632	0.00142227	0.0010227	2331	tags=30%, list=12%, signal=27%	2803/151835/2932/10038/8437/8085/6792/5465/148/1630/5071/54413/23105/7074/7473/5048/4916/57698/9362/659/118813/10507/9839/51199/10500/10509/84258/5999/2258/5802/59284/22999/10479/10611/56920/348/57715/64218/5532/22902/223117/10439/26999/5590/65078/8153/57699/4099/9699/6857/9472/214/6860/4133/4878/4692/1826/4137/10501/8851/23025/3897/23769/6585/6456/7143
GO CYTOLYSIS	CYTOLYSIS	41	0.677727	1.94275	0.000104919	0.00145103	0.00104338	2306	tags=29%, list=12%, signal=26%	4069/79792/8542/5551/140823/7040/3001/100507436/4277/730/2999/10859
GO IONOTROPIC GLUTAMATE RECEPTOR BINDING	IONOTROPIC GLUTAMATE RECEPTOR BINDING	27	-0.727211	-1.96859	0.000106043	0.00146361	0.00105243	1520	tags=48%, list=8%, signal=44%	388336/85358/1741/1742/81832/10368/50944/22941/27092/8851/10369/4983/729956
GO SKELETAL SYSTEM MORPHOGENESIS	SKELETAL SYSTEM MORPHOGENESIS	236	0.442361	1.59988	0.000107708	0.00147583	0.00106121	3031	tags=33%, list=16%, signal=28%	4057/302/1292/1277/4256/871/4323/6424/3202/6474/157506/3212/3217/64856/3235/3236/4313/6781/3213/3201/7291/3221/1291/1293/25886/27173/1490/3200/3204/3199/3037/4147/8692/3225/3214/54/2260/3203/7373/1303/7048/4665/2737/4838/285590/10265/6913/3198/3234/2296/649/9249/7059/3224/2268/7043/3227/10269/83452/22856/338773/145258/25976/3218/642658/4487/2261/7046/116039/85301/6662/5447/1749/29985/3207/389058/…
GO REGULATION OF NMDA RECEPTOR ACTIVITY	REGULATION OF NMDA RECEPTOR ACTIVITY	35	-0.687143	-1.99699	0.000107749	0.00147583	0.00106121	2863	tags=63%, list=15%, signal=54%	88/57554/1393/5649/65018/2903/54413/22871/2904/1741/1742/1612/1740/4747/2892/8787/2890/23542/5923/2893/2891/2902
GO GLYCOSYL COMPOUND CATABOLIC PROCESS	GLYCOSYL COMPOUND CATABOLIC PROCESS	40	0.665324	1.893	0.000107792	0.00147583	0.00106121	2647	tags=42%, list=14%, signal=37%	1890/1806/27350/7378/2519/2990/60489/2717/2517/51816/9582/4668/200316/4860/140564/191/978
GO MHC CLASS II PROTEIN COMPLEX BINDING	MHC CLASS II PROTEIN COMPLEX BINDING	16	0.8259	1.92547	0.000107792	0.00147583	0.00106121	279	tags=38%, list=1%, signal=37%	3122/3123/972/3108/3111/3109
GO INTEGRAL COMPONENT OF SYNAPTIC VESICLE MEMBRANE	INTEGRAL COMPONENT OF SYNAPTIC VESICLE MEMBRANE	33	-0.678312	-1.95834	0.00010857	0.00148103	0.00106495	2847	tags=61%, list=15%, signal=52%	57084/23208/9900/81615/7781/6804/140679/6843/5799/246213/5802/143425/132204/9145/388662/6857/6855/6860/57030/534
GO ALPHA BETA T CELL ACTIVATION	ALPHA BETA T CELL ACTIVATION	136	0.50559	1.72791	0.000108606	0.00148103	0.00106495	3044	tags=35%, list=16%, signal=30%	301/602/8651/57045/8764/10312/3659/54440/861/11314/3077/3606/1880/84695/91543/2000/5971/64332/3133/3965/942/29126/5788/51176/4860/10538/7048/2737/864/5734/3569/916/51043/3566/6774/3718/6932/10859/80149/865/6850/6778/3071/50856/30968/3142/944/9308
GO LEUKOCYTE MEDIATED CYTOTOXICITY	LEUKOCYTE MEDIATED CYTOTOXICITY	103	0.533762	1.7912	0.000110121	0.0014987	0.00107766	4413	tags=45%, list=23%, signal=35%	3383/7305/1075/5819/3077/3606/2217/84868/5551/2213/4843/80328/5873/3134/2013/100507436/3133/5052/3965/5788/10383/79465/4277/5777/2150/5817/8772/10859/203068/563/11151/3575/3684/7409/1054/80329/6813/146850/6372/3916/11035/3002/114836/23705/3251/912
GO CHROMOSOME CENTROMERIC REGION	CHROMOSOME CENTROMERIC REGION	193	0.458355	1.62336	0.00011039	0.00149938	0.00107815	3285	tags=35%, list=17%, signal=29%	332/891/55143/11004/79682/6990/9212/1058/6790/147841/55355/10403/4751/64151/1051/699/83540/5347/220134/1063/64105/11339/221150/6615/701/79019/7272/79980/201161/387103/64946/23421/4085/81930/113130/55055/55839/79023/151648/151246/54820/91687/1062/11130/10615/5664/23157/81620/378708/8655/157570/57405/91272/79075/9735/11335/57082/2491/90417/222229/54821/201254/55320/6612/79902/989/9918
GO CYTOKINE PRODUCTION INVOLVED IN IMMUNE RESPONSE	CYTOKINE PRODUCTION INVOLVED IN IMMUNE RESPONSE	105	0.532876	1.78747	0.000111193	0.00150728	0.00108383	2684	tags=34%, list=14%, signal=30%	972/7042/3162/2207/684/6556/567/10945/10417/8764/7097/54440/3077/3606/91543/7040/284/3140/3554/3134/3133/2150/7133/7855/388325/7043/3569/4282/8915/54795/3718/10859/695/117854/7474/7098
GO REACTIVE NITROGEN SPECIES METABOLIC PROCESS	REACTIVE NITROGEN SPECIES METABOLIC PROCESS	74	0.574611	1.81253	0.000113747	0.00153885	0.00110653	3855	tags=42%, list=20%, signal=34%	5806/857/3383/706/3689/9104/7097/2717/3043/1728/445/1191/64581/4843/54/199/1545/2643/5311/947/55829/80149/5743/5447/113277/3586/5025/3553/384/948/5879
GO REGULATION OF CHEMOTAXIS	REGULATION OF CHEMOTAXIS	209	0.455959	1.62658	0.000114364	0.00154414	0.00111033	2047	tags=25%, list=11%, signal=23%	5054/5919/3627/7422/3315/972/4192/2152/3576/9547/6347/7114/285/7057/7852/54209/728/6352/5880/1948/80310/23075/56833/7060/5764/1843/1880/8829/6405/4233/3673/811/4067/196527/63940/7040/1230/719/1902/2260/3965/199/9723/10371/683/25865/5159/6809/2150/3569/4282/4856/5155
GO ENDOCYTIC VESICLE MEMBRANE	ENDOCYTIC VESICLE MEMBRANE	157	0.483517	1.68001	0.000117372	0.00158163	0.00113729	1899	tags=31%, list=10%, signal=28%	3122/83871/9332/3123/3115/3113/972/857/10981/3117/3127/3119/4481/3118/6556/8673/1535/5880/567/10312/7097/1175/3120/6890/2535/811/2209/81035/928/1536/338382/533/8685/3134/3133/4193/7096/6608/817/79971/84329/23166/7314/8992/9341/55647/9554/1839/7855
GO EXTRACELLULAR MATRIX BINDING	EXTRACELLULAR MATRIX BINDING	56	0.611416	1.84253	0.000119836	0.00161165	0.00115888	1309	tags=39%, list=7%, signal=37%	302/3958/6696/3956/633/57124/7422/7045/3491/7057/3675/1634/1520/2006/169611/3688/3673/4811/8754/1893/4059/2817
GO POSITIVE REGULATION OF INTERFERON GAMMA PRODUCTION	POSITIVE REGULATION OF INTERFERON GAMMA PRODUCTION	62	0.601941	1.85527	0.000126481	0.00169667	0.00122001	3594	tags=42%, list=19%, signal=34%	3115/3113/6556/929/80381/602/54440/3606/84868/29108/914/64581/3554/3965/7855/916/8772/7784/7474/7098/51311/1054/9466/26191/51284/3553
GO PLATELET ACTIVATION	PLATELET ACTIVATION	154	0.479003	1.66038	0.000126654	0.00169667	0.00122001	2272	tags=28%, list=12%, signal=25%	10630/1281/1277/1192/6288/1278/3315/10627/5154/5359/2207/10451/2316/10398/7450/8323/50848/114897/3043/7056/5028/83706/4067/1465/958/928/5341/60/2151/3937/2149/29071/5777/84959/3569/5912/71/5155/3690/10019/4627/954/2769
GO REGULATION OF CHROMOSOME SEGREGATION	REGULATION OF CHROMOSOME SEGREGATION	99	0.538135	1.78043	0.000129197	0.00172734	0.00124207	2865	tags=35%, list=15%, signal=30%	991/9232/891/11004/10783/9212/9787/10460/10403/4751/699/5347/1894/1843/1063/990/998/701/9319/7272/4085/29127/113130/116028/9700/1062/10459/10615/4288/81620/51529/56852/26271/286053/90417
GO FIBROBLAST PROLIFERATION	FIBROBLAST PROLIFERATION	82	0.558678	1.79683	0.000130033	0.00173513	0.00124767	2047	tags=34%, list=11%, signal=31%	302/358/6277/972/2335/891/5154/890/1026/80310/3725/11314/2355/990/1019/1869/581/1956/1021/26272/8877/5159/2495/84875/4921/10269/4282/5155
GO CHROMOSOME LOCALIZATION	CHROMOSOME LOCALIZATION	75	0.573114	1.80623	0.000130763	0.00174146	0.00125222	2413	tags=29%, list=13%, signal=26%	84722/891/55143/11004/9787/81610/2669/10403/83540/3833/1063/81930/113130/54820/79998/1062/10096/27243/10615/9928/81620/91272
GO RESPONSE TO VITAMIN	RESPONSE TO VITAMIN	89	0.54973	1.80037	0.000132413	0.00176001	0.00126555	3955	tags=39%, list=21%, signal=31%	10631/1277/6696/3627/3371/7298/57817/6781/706/6591/25959/5764/3673/958/2242/5292/2348/1956/4193/920/1594/5251/2281/9227/5743/2934/83990/7421/7157/2950/2621/2626/3141/5468/360
GO REGULATION OF EPITHELIAL CELL APOPTOTIC PROCESS	REGULATION OF EPITHELIAL CELL APOPTOTIC PROCESS	76	0.569711	1.80107	0.000133401	0.00176969	0.00127252	1945	tags=25%, list=10%, signal=23%	5054/57124/6424/4192/6347/3162/7057/3383/7538/51129/641700/196527/284/831/958/80781/7128/3676/3569
GO INHIBITORY SYNAPSE ASSEMBLY	INHIBITORY SYNAPSE ASSEMBLY	12	-0.845327	-1.91095	0.0001355	0.00179406	0.00129004	1689	tags=75%, list=9%, signal=68%	5364/10507/2561/64218/2554/57555/375323/2566/2562
GO LEUKOTRIENE BIOSYNTHETIC PROCESS	LEUKOTRIENE BIOSYNTHETIC PROCESS	18	0.807609	1.93889	0.000136538	0.0018043	0.00129741	1243	tags=28%, list=6%, signal=26%	241/5322/240/4258/2687
GO SYNTAXIN BINDING	SYNTAXIN BINDING	73	-0.549064	-1.85973	0.000137088	0.00180808	0.00130012	1967	tags=37%, list=10%, signal=33%	6293/8938/9751/9515/440279/134957/6861/84258/9066/143425/55638/132204/8447/6844/148281/1612/112476/63908/773/6857/6812/6855/6860/6616/23025/10815/10814
GO NEGATIVE REGULATION OF CYSTEINE TYPE ENDOPEPTIDASE ACTIVITY	NEGATIVE REGULATION OF CYSTEINE TYPE ENDOPEPTIDASE ACTIVITY	89	0.547862	1.79425	0.000145023	0.00190905	0.00137273	1697	tags=28%, list=9%, signal=26%	4057/4318/358/7422/960/332/2537/4804/5329/114769/7057/4504/1800/83596/2876/6195/831/3428/10542/8530/4193/51499/51176/330/3082
GO MACROPHAGE ACTIVATION	MACROPHAGE ACTIVATION	92	0.537993	1.77001	0.000145742	0.0019135	0.00137593	3128	tags=40%, list=16%, signal=34%	10135/972/22918/6556/7057/712/7305/11326/54209/728/1075/3689/7097/3725/84868/2213/2896/1191/8530/7096/199/5788/1050/22904/8877/284467/3569/4282/3566/80149/6850/7474/7098/3684/51311/113277/3586
GO RAGE RECEPTOR BINDING	RAGE RECEPTOR BINDING	11	0.882582	1.89474	0.000145921	0.0019135	0.00137593	1105	tags=64%, list=6%, signal=60%	6275/6280/6279/6284/2357/3148/6285
GO POSITIVE REGULATION OF MONONUCLEAR CELL MIGRATION	POSITIVE REGULATION OF MONONUCLEAR CELL MIGRATION	23	0.760551	1.96666	0.000148121	0.00193863	0.00139399	1490	tags=35%, list=8%, signal=32%	5054/3958/3627/6352/80310/196527/1230/199
GO RESPONSE TO TRANSFORMING GROWTH FACTOR BETA	RESPONSE TO TRANSFORMING GROWTH FACTOR BETA	232	0.443964	1.59961	0.000150478	0.00196571	0.00141347	2092	tags=23%, list=11%, signal=21%	2331/10631/1281/1284/1277/1278/9518/114990/7042/857/4015/255743/11117/7791/7057/3675/858/4435/2022/80310/94031/7041/25878/57045/50848/2615/3725/4052/2353/8754/135228/678/3309/7040/8692/2348/54829/7044/50507/4053/10370/7314/7048/4838/3987/3693/94/864/1003/9141/7043/56937/27122/6386
GO NEURON PROJECTION CYTOPLASM	NEURON PROJECTION CYTOPLASM	83	-0.521957	-1.82019	0.000156299	0.00203786	0.00146534	3652	tags=49%, list=19%, signal=40%	282991/2332/66000/10239/6416/6687/5594/2899/4976/10749/10084/5905/7014/6683/6792/5048/22906/3208/3799/7881/23710/55638/1742/5813/23095/23162/5874/1778/8120/667/1740/4747/3800/11127/4130/4133/2898/3798/9026/547/4137
GO TERTIARY GRANULE MEMBRANE	TERTIARY GRANULE MEMBRANE	72	0.576969	1.82859	0.000156988	0.00204294	0.001469	3466	tags=49%, list=18%, signal=40%	5328/2207/23601/22918/6556/8673/1535/963/3689/84418/11314/3903/5269/196527/6515/1536/100049587/28956/4973/53831/5912/4893/5724/10288/1315/8655/23218/3684/945/8987/3687/8773/10159/160364/966
GO RESPONSE TO REACTIVE OXYGEN SPECIES	RESPONSE TO REACTIVE OXYGEN SPECIES	217	0.445622	1.59819	0.000159233	0.00206821	0.00148717	2509	tags=28%, list=13%, signal=24%	301/1277/4318/358/6648/3939/6649/3162/10516/8061/6382/890/1017/4504/4313/1800/983/5111/80310/9104/1263/3725/3240/1894/1843/6772/3043/3039/1728/836/2876/2353/4233/8754/140823/84557/8692/1956/5052/7128/4193/2146/653361/1545/7295/5159/3082/578/8737/3569/2643/2281/3040/51022/5311/2861/51526/695/6778/374
GO REGULATION OF NUCLEAR DIVISION	REGULATION OF NUCLEAR DIVISION	185	0.461481	1.63015	0.000162348	0.00210467	0.00151339	3726	tags=34%, list=19%, signal=27%	991/11065/9232/891/3976/51203/83987/10783/9212/858/9787/6790/2827/10460/10403/4751/699/5347/1843/1063/10040/990/998/701/9319/7272/811/4085/9820/3304/995/113130/3481/1111/5159/9700/1062/10459/27243/4288/5155/81620/1104/51529/4487/26271/9735/7474/9088/286053/23636/3832/79866/246184/8260/5925/3552/3553/54998/3303/23137/1950
GO POSITIVE REGULATION OF WOUND HEALING	POSITIVE REGULATION OF WOUND HEALING	58	0.607468	1.85262	0.000164369	0.00212683	0.00152932	1828	tags=26%, list=10%, signal=23%	10630/301/5054/2152/7057/7852/8840/50848/7056/196527/5341/64581/2149/7048/1839
GO CELLULAR TRANSITION METAL ION HOMEOSTASIS	CELLULAR TRANSITION METAL ION HOMEOSTASIS	106	0.52131	1.75073	0.000168606	0.00217753	0.00156578	1794	tags=21%, list=9%, signal=19%	4057/6280/6279/4499/3162/1356/6556/2512/4493/4504/57817/7037/4502/79901/3077/4489/64116/30061/148867/4496/4495/2495
GO DENDRITIC SPINE MORPHOGENESIS	DENDRITIC SPINE MORPHOGENESIS	59	-0.573037	-1.87542	0.000172204	0.00221981	0.00159618	2853	tags=51%, list=15%, signal=43%	1627/5728/4976/5649/10152/115703/54413/7074/5048/22871/22891/8997/1501/7804/25791/85358/55619/1742/10611/9762/80725/9912/55607/50944/22941/5063/23316/26052/8851/2047
GO CELL BODY MEMBRANE	CELL BODY MEMBRANE	29	-0.708474	-1.97149	0.000172816	0.0022235	0.00159884	1884	tags=45%, list=10%, signal=40%	3748/153090/3208/114/2558/3746/3747/64805/3751/23769/90249/3745/478
GO REGULATION OF REPRODUCTIVE PROCESS	REGULATION OF REPRODUCTIVE PROCESS	157	0.478529	1.66268	0.000176538	0.00226711	0.0016302	2950	tags=27%, list=15%, signal=23%	7076/991/308/3976/5176/85360/3239/6790/397/10549/7262/2827/1268/9104/5021/1843/6615/5028/9319/7272/10184/811/995/259266/10371/79084/10370/4838/5724/7784/367/4487/26271/2683/2697/7474/51441/151056/993/3955/6662/994
GO BIOMINERALIZATION	BIOMINERALIZATION	160	0.462213	1.60552	0.000178421	0.00228701	0.0016445	2911	tags=29%, list=15%, signal=25%	4057/302/1277/6696/4256/1278/10457/4015/3381/56975/3491/9636/29887/7291/5552/1051/10312/5764/51374/54757/196527/7040/1893/7071/54829/1230/22904/6574/1594/2268/7043/4921/10269/5744/5251/7286/54795/338773/26271/5743/2719/2261/9270/116039/5167/6662
GO PEPTIDOGLYCAN MURALYTIC ACTIVITY	PEPTIDOGLYCAN MURALYTIC ACTIVITY	13	0.864888	1.91145	0.000184353	0.00235862	0.00169599	101	tags=8%, list=1%, signal=8%	4069
GO MEMBRANE DEPOLARIZATION DURING ACTION POTENTIAL	MEMBRANE DEPOLARIZATION DURING ACTION POTENTIAL	36	-0.660201	-1.93552	0.000185555	0.00236956	0.00170386	2543	tags=53%, list=13%, signal=46%	6324/6546/6330/776/287/775/783/8911/8912/288/6334/477/6326/781/610/6323/6327/6328/55800
GO SYNAPTIC VESICLE PRIMING	SYNAPTIC VESICLE PRIMING	19	-0.789265	-1.98274	0.000187812	0.00238593	0.00171563	1756	tags=63%, list=9%, signal=57%	8867/440279/6804/6843/26059/6622/63908/5864/6812/6616/112755/23025
GO SUBSTRATE ADHESION DEPENDENT CELL SPREADING	SUBSTRATE ADHESION DEPENDENT CELL SPREADING	97	0.524435	1.7301	0.000188009	0.00238593	0.00171563	2283	tags=33%, list=12%, signal=29%	10630/10631/2633/6281/4192/2335/3915/3912/2316/2192/79778/7041/8324/3913/91663/998/8829/10319/83706/811/3037/81/4739/9341/3987/1942/3676/3690/9928/64098/29780/10109
GO NEGATIVE REGULATION OF TUMOR NECROSIS FACTOR SUPERFAMILY CYTOKINE PRODUCTION	NEGATIVE REGULATION OF TUMOR NECROSIS FACTOR SUPERFAMILY CYTOKINE PRODUCTION	61	0.598169	1.83812	0.000188125	0.00238593	0.00171563	3805	tags=41%, list=20%, signal=33%	4057/10457/54209/706/602/7291/84868/54206/54/3965/7128/29126/5777/10859/947/55829/80149/50856/945/3586/9466/26191/384/2950/2621
GO INTRINSIC APOPTOTIC SIGNALING PATHWAY	INTRINSIC APOPTOTIC SIGNALING PATHWAY	283	0.421176	1.54375	0.000188235	0.00238593	0.00171563	4110	tags=36%, list=21%, signal=29%	4318/6280/6648/3315/972/960/857/6279/3162/7132/2537/5329/9833/837/602/1026/8531/597/83596/6591/1051/23612/1969/23645/64782/836/2876/1649/6615/5034/51246/3065/29108/1191/1869/51060/3428/581/57761/8795/90993/4193/4582/79073/2023/51499/1545/7314/220042/11200/578/624/7133/60401/4282/79156/5163/9641/84944/10134/8996/672/835/1870/79094/55829/8382/2810/4487/51065/5743/4776/6201/3094/51079/7161/10550/558…
GO EXCITATORY SYNAPSE ASSEMBLY	EXCITATORY SYNAPSE ASSEMBLY	26	-0.720569	-1.93215	0.000191066	0.00241587	0.00173716	1818	tags=62%, list=9%, signal=56%	4916/22871/5802/85358/347730/64218/26045/57555/50944/5789/2895/22941/64101/9379/9378/869
GO PIGMENT GRANULE	PIGMENT GRANULE	105	0.525081	1.76132	0.000191303	0.00241587	0.00173716	2903	tags=40%, list=15%, signal=34%	302/10457/822/4323/10981/813/967/9601/5176/7037/8836/55686/6510/3688/1508/5034/3309/10130/2923/5873/5479/5052/51393/1509/6184/476/6809/9554/483/6856/3690/6386/10211/10972/23682/7184/23385/191/5901/23193/54843/6513
GO CLATHRIN DEPENDENT ENDOCYTOSIS	CLATHRIN DEPENDENT ENDOCYTOSIS	41	-0.635132	-1.9312	0.000193373	0.0024375	0.00175271	2729	tags=41%, list=14%, signal=36%	5291/3092/23208/23149/60682/29978/84251/22876/163/9829/6457/9873/9026/10188/28514/9892/6456
GO POSITIVE CHEMOTAXIS	POSITIVE CHEMOTAXIS	69	0.573546	1.80801	0.000194924	0.00245253	0.00176352	2750	tags=32%, list=14%, signal=27%	3958/6288/3627/10457/7422/2152/3576/285/6352/3148/8829/4233/3673/6289/284/3082/2150/4282/5155/7474/11151/7857
GO CELL REDOX HOMEOSTASIS	CELL REDOX HOMEOSTASIS	76	0.563472	1.78134	0.00020158	0.0025316	0.00182038	4121	tags=50%, list=22%, signal=39%	6556/9601/1535/5880/10549/2745/83442/1728/2876/9588/1649/10954/5034/10130/2923/1536/51060/4688/4843/5052/4689/653361/84329/7295/51022/55829/23071/51714/79770/81542/4780/54431/2936/81567/30001/10190/5768/112398
GO ACTIN FILAMENT	ACTIN FILAMENT	118	0.506634	1.71384	0.000203012	0.00254491	0.00182995	3183	tags=33%, list=17%, signal=28%	301/8572/55970/9124/87/8826/2316/7171/27295/5358/5880/79778/9260/3059/23406/4430/23022/3936/54857/60/644150/23433/11344/9948/199/4641/3055/7170/7169/71/10094/5311/5756/11151/4650/7454/83700/92241/5074
GO MYD88 DEPENDENT TOLL LIKE RECEPTOR SIGNALING PATHWAY	MYD88 DEPENDENT TOLL LIKE RECEPTOR SIGNALING PATHWAY	36	0.678422	1.8897	0.000204501	0.00255673	0.00183845	3835	tags=58%, list=20%, signal=47%	23643/4615/929/7097/3659/11314/3665/3656/7096/146722/7314/51135/695/4214/51311/10318/51284/7316/948/3654/7311
GO LEUKOCYTE APOPTOTIC PROCESS	LEUKOCYTE APOPTOTIC PROCESS	106	0.518239	1.74041	0.000204703	0.00255673	0.00183845	3896	tags=42%, list=20%, signal=33%	301/3958/972/2207/9212/6352/10945/3059/836/1514/3665/4067/581/3965/1234/29126/3559/3661/2737/27166/578/8737/8660/1942/3569/4282/8915/8772/3718/10859/55829/695/171558/7474/3575/1029/3586/3620/5293/7157/384/2621/3579/11035
GO IONOTROPIC GLUTAMATE RECEPTOR ACTIVITY	IONOTROPIC GLUTAMATE RECEPTOR ACTIVITY	19	-0.786578	-1.97599	0.000205557	0.00256271	0.00184275	2002	tags=74%, list=10%, signal=66%	2906/2903/2904/2905/2900/2895/2892/2894/116443/2890/2898/2893/2891/2902
GO RESPONSE TO MECHANICAL STIMULUS	RESPONSE TO MECHANICAL STIMULUS	210	0.452202	1.61412	0.000207782	0.00258574	0.00185931	2916	tags=30%, list=15%, signal=25%	1116/3485/10631/1281/1277/3627/358/4323/1647/4192/3371/891/7132/285/8061/7057/7852/4615/1535/1634/834/55584/355/2022/50848/3726/3659/5764/3725/6772/2353/4055/3673/5028/958/5723/4316/1265/1956/8795/841/6548/1111/7048/476/578/5734/3728/8915/8772/5311/835/8932/642658/5743/2697/4214/7098/6513/51311/6662/64220
GO CEREBELLAR CORTEX FORMATION	CEREBELLAR CORTEX FORMATION	21	-0.759032	-1.95053	0.000208638	0.00259166	0.00186357	1116	tags=52%, list=6%, signal=49%	5781/8861/51286/8925/85442/64211/2895/869/23017/4983/28514
GO SULFUR COMPOUND BINDING	SULFUR COMPOUND BINDING	253	0.422261	1.53675	0.000216998	0.00269062	0.00193472	2309	tags=22%, list=12%, signal=19%	4057/10631/6288/3627/10457/5322/11167/7422/5118/4192/6649/2335/53834/308/1289/3491/59271/7057/5104/59352/1842/8840/283/56925/3075/129804/7060/6373/5764/9510/51816/1490/79690/50509/8829/3673/4316/2260/9508/5788/4053/4257/1839/9141/7059/3276/26577/4856/6646/3155/1307/307/1104/30817/947
GO PLASMINOGEN ACTIVATION	PLASMINOGEN ACTIVATION	25	0.738268	1.93587	0.000219063	0.00271131	0.0019496	1485	tags=32%, list=8%, signal=30%	5054/302/5327/5328/7057/1522/5230/2023
GO ANTIGEN PROCESSING AND PRESENTATION OF PEPTIDE OR POLYSACCHARIDE ANTIGEN VIA MHC CLASS II	ANTIGEN PROCESSING AND PRESENTATION OF PEPTIDE OR POLYSACCHARIDE ANTIGEN VIA MHC CLASS II	100	0.532472	1.76615	0.00021974	0.00271476	0.00195208	1568	tags=31%, list=8%, signal=29%	3122/3123/3115/3113/972/3117/3127/3119/2207/3108/3111/3118/3109/11004/7057/24137/54209/1520/1175/3120/9493/9871/829/8905/1514/29108/2213/29127/81930/1509/830
GO FOREBRAIN DEVELOPMENT	FOREBRAIN DEVELOPMENT	380	-0.348493	-1.42774	0.000227587	0.00280663	0.00201814	2409	tags=26%, list=13%, signal=23%	64919/4771/89927/79048/2932/5649/4760/2534/10716/6343/1267/4040/84376/23224/2637/6091/6714/6657/2909/8648/153090/5048/23035/146760/6900/2145/317762/3516/23135/10579/7155/652/9839/7804/63974/51199/140679/84687/3799/4628/7248/2258/5802/2648/9693/55079/57282/85358/349667/5881/4852/4763/4781/429/3400/3746/4851/166614/79969/3747/64805/6656/2066/26050/221692/6658/4900/65078/64211/55636/4747/26038/25806…
GO POSITIVE REGULATION OF NEURON PROJECTION DEVELOPMENT	POSITIVE REGULATION OF NEURON PROJECTION DEVELOPMENT	282	-0.373517	-1.49527	0.000232025	0.00285621	0.00205379	2331	tags=29%, list=12%, signal=26%	2803/151835/5649/2534/8437/6792/221914/23426/1809/6091/5071/26039/7074/2909/153090/7473/5048/4916/55754/57698/22871/9362/659/118813/8997/5364/27/6376/2033/11141/6453/57498/22906/10507/9839/7804/51199/126520/84258/100132074/59284/22999/9693/85358/9148/1742/322/348/51761/5365/22902/65009/23373/55607/5979/91752/9231/5274/57118/8153/4747/50944/57699/22849/5789/257194/9699/22941/6857/5063/11075/6860/2…
GO NEGATIVE REGULATION OF CELL CYCLE G1 S PHASE TRANSITION	NEGATIVE REGULATION OF CELL CYCLE G1 S PHASE TRANSITION	105	0.520106	1.74463	0.000234211	0.00287794	0.00206941	3689	tags=46%, list=19%, signal=37%	10457/1031/1647/6347/891/7465/1017/1026/6790/983/5111/25959/1263/51512/1019/56241/144455/1869/581/995/10385/4193/4582/2146/1021/51499/11200/8737/3276/5311/835/10106/79733/6118/2810/51065/5933/10263/1029/91607/55571/989/55159/7157/5925/10498/4849/51339
GO GROWTH FACTOR ACTIVITY	GROWTH FACTOR ACTIVITY	161	0.467982	1.62577	0.00023614	0.00289642	0.00208271	2204	tags=24%, list=12%, signal=21%	7076/7422/9518/7042/4192/1890/3976/5154/23529/2202/182/80310/7060/9535/5764/51816/1490/7425/7873/7040/2896/7044/6320/3481/5008/2821/3082/4838/29937/1839/22943/649/7043/3569/4856/5155/2919/51293
GO RESPONSE TO TOPOLOGICALLY INCORRECT PROTEIN	RESPONSE TO TOPOLOGICALLY INCORRECT PROTEIN	200	0.450942	1.60635	0.000239309	0.00293004	0.00210688	4895	tags=42%, list=26%, signal=31%	871/3315/3576/6347/467/3310/11015/7057/6464/7060/4000/3337/55741/23645/1649/10954/56005/811/55062/7873/3309/10130/1191/9820/3304/23753/581/27129/90993/6734/26608/578/26270/58477/2135/57414/7184/10106/79094/55829/118424/4189/3336/91319/51726/23071/439/121506/51768/27348/4780/10113/64764/1861/7009/5771/5611/22872/821/5770/3303/2137/55033/1200/30001/51283/9709/9695/9451/440/2161/10525/3338/3484/3316…
GO NEGATIVE REGULATION OF PROTEIN MATURATION	NEGATIVE REGULATION OF PROTEIN MATURATION	32	0.696502	1.89104	0.000242175	0.00295983	0.0021283	3507	tags=50%, list=18%, signal=41%	5054/114769/7057/1522/83596/2619/831/8530/4193/330/9528/8996/79094/7850/5345/120892
GO REGULATION OF EPITHELIAL CELL MIGRATION	REGULATION OF EPITHELIAL CELL MIGRATION	217	0.440312	1.57914	0.000244543	0.00298343	0.00214527	2730	tags=28%, list=14%, signal=24%	301/4223/4318/27286/7422/3315/7042/7114/3162/285/7057/57381/3675/5176/6781/1634/7101/1969/6672/5764/3725/11221/5606/7026/5216/8829/4233/3673/8754/811/7040/3037/284/2896/958/2013/2260/161742/10371/2821/6776/7048/25865/5547/94/1839/1942/3728/5155/3690/4163/54567/374969/80149/56999/5743/7474/51094/152007/51564/9270
GO MEMBRANE DEPOLARIZATION	MEMBRANE DEPOLARIZATION	86	-0.505224	-1.78363	0.000247486	0.00301395	0.00216721	3157	tags=44%, list=16%, signal=37%	596/23171/6330/666/25/2805/776/287/775/783/6714/785/10962/8911/8912/288/774/777/6334/2729/477/6326/4092/885/781/610/6323/5590/5027/773/6327/1141/1137/27092/2257/6328/10369/55800
GO INHIBITORY EXTRACELLULAR LIGAND GATED ION CHANNEL ACTIVITY	INHIBITORY EXTRACELLULAR LIGAND GATED ION CHANNEL ACTIVITY	15	-0.821739	-1.97847	0.000254444	0.00309182	0.00222321	1276	tags=60%, list=7%, signal=56%	2557/2743/2558/2561/8001/2554/2566/2565/2556
GO NEGATIVE REGULATION OF REPRODUCTIVE PROCESS	NEGATIVE REGULATION OF REPRODUCTIVE PROCESS	57	0.613323	1.85841	0.000254786	0.00309182	0.00222321	2581	tags=30%, list=13%, signal=26%	7076/3976/5176/397/10549/9104/1843/6615/9319/7272/811/79084/4838/7784/26271/2697/7474
GO RESPONSE TO PROTOZOAN	RESPONSE TO PROTOZOAN	26	0.733569	1.93938	0.000258576	0.00312862	0.00224967	2153	tags=38%, list=11%, signal=34%	6556/2634/4615/602/958/64581/116071/10538/115361/3566
GO CHEMOKINE BINDING	CHEMOKINE BINDING	32	0.695951	1.88954	0.000258734	0.00312862	0.00224967	4657	tags=56%, list=24%, signal=43%	10630/5355/7852/7538/3688/2/1230/1234/3676/3690/3685/9034/57007/3579/729230/2532/2833/2826
GO REGULATION OF CALCIUM ION DEPENDENT EXOCYTOSIS	REGULATION OF CALCIUM ION DEPENDENT EXOCYTOSIS	43	-0.6239	-1.90961	0.000260085	0.0031394	0.00225742	3319	tags=56%, list=17%, signal=46%	150/83849/51760/23208/114088/8938/8448/6804/8911/8912/6861/84258/9066/143425/4851/8447/148281/57586/192683/6857/6812/8941/6860/3745
GO ICOSANOID BIOSYNTHETIC PROCESS	ICOSANOID BIOSYNTHETIC PROCESS	50	0.6225	1.8389	0.000261159	0.0031468	0.00226275	2699	tags=32%, list=14%, signal=28%	301/2171/241/5322/972/873/5742/240/5321/4258/2687/4282/6916/6850/5743/9536
GO SPECIFIC GRANULE MEMBRANE	SPECIFIC GRANULE MEMBRANE	90	0.536961	1.7649	0.000261937	0.00315063	0.00226549	3735	tags=43%, list=20%, signal=35%	5328/64114/23601/5329/22918/8673/1535/963/3689/3903/196527/6515/54918/1536/719/28956/4973/53831/84329/683/10555/7133/5912/3683/10970/221/6518/3685/8560/5906/3684/121260/945/64386/8773/160364/966/2358/948
GO SIGNAL TRANSDUCTION BY P53 CLASS MEDIATOR	SIGNAL TRANSDUCTION BY P53 CLASS MEDIATOR	266	0.424945	1.55561	0.000264023	0.00317014	0.00227952	2516	tags=27%, list=13%, signal=24%	972/960/1647/891/22974/1017/9212/2305/602/1026/6790/983/7291/5111/83596/6591/23612/6119/6672/1263/5982/200734/51512/56950/64782/399473/6615/51246/3065/29108/144455/1869/5932/9156/3428/8444/581/995/6884/4193/4582/116028/79073/161742/641/51499/55170/1111/580/7314/10538/11200/133383/6883/624/5983/3276/10269/60401/4282/672/835/1870/79733/5984/6118/3364/2810/10397/4487/51065
GO OSTEOCLAST DIFFERENTIATION	OSTEOCLAST DIFFERENTIATION	98	0.5261	1.73557	0.000265761	0.0031854	0.0022905	2684	tags=33%, list=14%, signal=28%	4057/302/2207/56975/760/7305/8840/54209/7037/29887/1051/1969/10312/3726/1880/2353/135228/7071/1230/1945/126014/22904/10272/84959/11006/28962/6988/169200/10859/10234/2719/7098
GO RESPONSE TO ESTROGEN	RESPONSE TO ESTROGEN	72	0.563091	1.78461	0.000266404	0.00318752	0.00229202	2263	tags=32%, list=12%, signal=28%	3485/4323/3939/857/3162/4982/760/4435/10095/10865/1841/4193/51083/10370/7048/5159/2737/1594/7043/1495/10011/3566/672
GO MICROTUBULE CYTOSKELETON ORGANIZATION INVOLVED IN MITOSIS	MICROTUBULE CYTOSKELETON ORGANIZATION INVOLVED IN MITOSIS	133	0.49054	1.67773	0.00026708	0.00318851	0.00229274	2566	tags=32%, list=13%, signal=28%	991/10252/84722/4605/332/891/51203/2316/22974/10253/24137/9212/1058/6790/10460/10403/4751/3688/83540/9055/3833/25886/5347/9493/7272/4085/3304/29127/54820/284403/6491/11200/79998/9700/1062/7283/27243/1104/6993/57405/5901/2697
GO GABA GATED CHLORIDE ION CHANNEL ACTIVITY	GABA GATED CHLORIDE ION CHANNEL ACTIVITY	13	-0.833978	-1.93202	0.00026742	0.00318851	0.00229274	1549	tags=69%, list=8%, signal=64%	2557/2560/2558/2561/2554/2566/2565/2556/2562
GO NEUROTRANSMITTER BIOSYNTHETIC PROCESS	NEUROTRANSMITTER BIOSYNTHETIC PROCESS	96	0.524887	1.73017	0.000267994	0.00318866	0.00229284	2543	tags=25%, list=13%, signal=22%	26002/5806/857/1806/3383/706/3689/9104/2717/3043/1728/445/1191/64581/4843/54/199/1545/2643/6470/5311/947/80149/5743
GO LIPID DROPLET	LIPID DROPLET	82	0.544467	1.75112	0.000268366	0.00318866	0.00229284	1291	tags=20%, list=7%, signal=18%	5947/302/50486/857/157506/29923/123/26157/8228/2597/5321/80270/91543/9144/10226/5908
GO NEURON PROJECTION EXTENSION	NEURON PROJECTION EXTENSION	167	-0.425617	-1.61505	0.000269194	0.00319294	0.00229592	3126	tags=38%, list=16%, signal=32%	23499/2664/9706/29882/25/9201/1627/51760/2016/57556/57611/54437/2803/151835/2932/8437/6792/5071/54413/7074/7473/5048/4916/57698/9362/659/118813/10507/10500/10509/84258/5802/59284/22999/10479/56920/348/57715/64218/5532/22902/223117/10439/26999/5590/65078/57699/4099/9699/6857/214/6860/4133/4692/1826/4137/10501/8851/23025/3897/23769/6585/6456/7143
GO TRANSFORMING GROWTH FACTOR BETA BINDING	TRANSFORMING GROWTH FACTOR BETA BINDING	23	0.74645	1.93019	0.000274356	0.00324853	0.00233589	2682	tags=61%, list=14%, signal=52%	114990/22918/7057/2022/57045/2615/4052/135228/8692/7048/94/7043/3685/7046
GO RECEPTOR SIGNALING PATHWAY VIA STAT	RECEPTOR SIGNALING PATHWAY VIA STAT	157	0.471544	1.63841	0.000276521	0.0032685	0.00235026	3966	tags=32%, list=21%, signal=26%	9021/857/6347/3976/7132/8835/23529/602/6352/8651/1489/83666/9111/11314/5175/6772/3059/3606/4067/958/3588/3280/2149/5788/1545/5008/6776/3569/54625/3587/10019/54741/6774/5311/3718/6778/3575/51094/2261/23568/3586/6773/9466/231/5771/128869/3455/1950/51379/729230/8784
GO SYNAPTIC TRANSMISSION GABAERGIC	SYNAPTIC TRANSMISSION GABAERGIC	45	-0.618105	-1.92403	0.000278774	0.00328943	0.0023653	2783	tags=56%, list=15%, signal=48%	5728/8938/2557/11188/148/22871/23228/3799/8224/5881/2558/23349/4763/2561/64854/5334/5581/2554/57555/6812/85445/6529/2566/2565/2556
GO G PROTEIN COUPLED NEUROTRANSMITTER RECEPTOR ACTIVITY	G PROTEIN COUPLED NEUROTRANSMITTER RECEPTOR ACTIVITY	39	-0.631649	-1.87222	0.000279997	0.00329817	0.00237159	3112	tags=31%, list=16%, signal=26%	1815/3361/3358/51222/2911/3350/3356/1132/1128/11255/9568/2550
GO RESPIRATORY SYSTEM DEVELOPMENT	RESPIRATORY SYSTEM DEVELOPMENT	199	0.438293	1.55982	0.00028065	0.00330017	0.00237303	2031	tags=23%, list=11%, signal=20%	1116/10630/3488/7422/4323/10252/3371/3202/4015/53834/3976/5154/2302/157506/10253/3675/1522/83931/5764/8985/1490/57190/84695/445/998/57333/54206/1956/3280/2260/1050/10272/10413/51176/9620/7048/8914/5159/2737/4838/5499/51668/1978/7043/5251
GO LEADING EDGE MEMBRANE	LEADING EDGE MEMBRANE	172	-0.419727	-1.59379	0.000281777	0.00330773	0.00237846	2475	tags=35%, list=13%, signal=31%	2557/9495/729993/4771/6711/5152/24138/6792/23362/23286/23224/6714/7430/4355/7074/3748/23189/66036/11170/9847/324/5141/388336/3208/84687/8844/5064/23136/273/54212/23710/286/57608/2558/3746/3747/9912/50649/84249/23122/2554/10297/92154/6506/2890/23109/29993/84059/9026/4137/26047/2566/2565/90249/3745/3767/2556/729956/5662/55612
GO ENDOSOME MEMBRANE	ENDOSOME MEMBRANE	474	0.369064	1.39696	0.000283722	0.00332485	0.00239078	2293	tags=20%, list=12%, signal=18%	301/302/55240/3122/8572/10457/3123/3115/3113/857/10410/3117/3127/3119/64114/3108/3111/23643/967/3118/3109/23237/30846/6556/4615/929/8673/1889/567/7037/29887/26872/55686/10312/8324/9516/1175/3120/54432/30844/55858/8763/2217/10040/4430/3665/29984/55062/2209/151636/2923/2888/54918/10226/118429/338382/533/10542/3656/1956/5873/3134/3133/28956/4689/29126/5872/1509/79971/8877/7314/8992/55851/9341/8737/9…
GO SPINDLE	SPINDLE	352	0.392602	1.46012	0.000287045	0.00334858	0.00240784	3962	tags=33%, list=21%, signal=26%	822/3315/991/84722/332/891/55143/51203/22974/24137/10783/10112/6990/9212/9787/6790/983/81610/2669/10460/4751/1263/9055/3833/26524/25886/5347/1894/9493/79801/220134/1063/221150/990/150468/998/701/7272/642273/79980/201161/4085/29127/115106/81930/259266/151648/54820/284403/4739/79998/9700/1062/7283/10459/10615/56992/9928/23157/8841/4627/5311/10733/79649/1729/8655/121441/6993/84902/91272/10636/26271/…
GO REGULATION OF SYNAPTIC TRANSMISSION GLUTAMATERGIC	REGULATION OF SYNAPTIC TRANSMISSION GLUTAMATERGIC	70	-0.529084	-1.78079	0.00028708	0.00334858	0.00240784	2435	tags=36%, list=13%, signal=31%	2915/5649/5270/54413/22871/2911/85358/84896/7349/2913/477/8398/9162/3356/57555/50944/22941/6857/6812/2898/23542/9378/23025/4983/7143
GO EXPLORATION BEHAVIOR	EXPLORATION BEHAVIOR	24	-0.730756	-1.92609	0.000287217	0.00334858	0.00240784	1674	tags=58%, list=9%, signal=53%	27/57282/3350/1742/347730/348/18/5581/57555/2571/1137/1620/57338/7143
GO RESPONSE TO HYDROGEN PEROXIDE	RESPONSE TO HYDROGEN PEROXIDE	132	0.482053	1.64772	0.000298483	0.003474	0.00249802	3183	tags=36%, list=17%, signal=30%	301/1277/358/3939/3162/8061/6382/983/5111/80310/3725/3240/1894/1843/6772/3043/3039/1728/836/2876/4233/8754/84557/7128/4193/2146/1545/7295/5159/3082/578/8737/3569/2281/3040/51022/2861/51526/6778/374/55364/2308/5536/5580/3586/4780/5074
GO POSITIVE REGULATION OF INTERLEUKIN 8 SECRETION	POSITIVE REGULATION OF INTERLEUKIN 8 SECRETION	16	0.805749	1.87849	0.000305737	0.00354581	0.00254966	2581	tags=69%, list=13%, signal=60%	965/929/7097/29108/8692/914/3965/7096/2149/2150/7474
GO POSITIVE REGULATION OF DENDRITIC SPINE DEVELOPMENT	POSITIVE REGULATION OF DENDRITIC SPINE DEVELOPMENT	45	-0.61548	-1.91586	0.000305897	0.00354581	0.00254966	2853	tags=47%, list=15%, signal=40%	1627/4976/5649/6792/7074/5048/22871/8997/6453/7804/100132074/85358/9148/348/55607/9231/50944/22849/22941/5063/23316
GO NEGATIVE REGULATION OF CELL DEVELOPMENT	NEGATIVE REGULATION OF CELL DEVELOPMENT	324	-0.361242	-1.45973	0.000306639	0.00354581	0.00254966	2535	tags=31%, list=13%, signal=27%	152330/5087/10363/4821/89927/283659/57801/22933/7025/2932/2039/23405/56478/1656/9572/5465/23108/1809/84376/10220/1630/340533/6657/54413/7068/23105/1949/84504/7473/5048/4916/22871/23189/146760/6900/22891/6376/144347/22876/10507/3397/25791/5530/10500/10509/5999/8831/6653/7248/2258/5802/9693/1400/55079/23258/349667/57534/4763/56920/429/7274/3400/4851/348/4168/57715/64218/22902/223117/54328/2066/2346…
GO LAMININ BINDING	LAMININ BINDING	29	0.70571	1.88575	0.000306729	0.00354581	0.00254966	1309	tags=41%, list=7%, signal=39%	3958/3956/7057/3675/1520/3688/3673/4811/8754/1893/4059/2817
GO GABA RECEPTOR BINDING	GABA RECEPTOR BINDING	16	-0.787826	-1.91851	0.000307779	0.00355194	0.00255407	3443	tags=75%, list=18%, signal=62%	10564/11337/9495/23228/2560/22906/23710/152789/2558/5334/375323/2565
GO METAPHASE PLATE CONGRESSION	METAPHASE PLATE CONGRESSION	57	0.609556	1.84699	0.000309775	0.00356894	0.00256629	2413	tags=33%, list=13%, signal=29%	84722/891/55143/11004/81610/2669/10403/83540/3833/1063/81930/113130/79998/1062/27243/10615/9928/81620/91272
GO REGULATION OF LONG TERM NEURONAL SYNAPTIC PLASTICITY	REGULATION OF LONG TERM NEURONAL SYNAPTIC PLASTICITY	26	-0.70667	-1.89488	0.000311142	0.00357865	0.00257327	1707	tags=50%, list=9%, signal=46%	3815/8831/6622/85358/9148/1742/4763/81832/9145/3766/6855/2898/2902
GO KILLING OF CELLS OF OTHER ORGANISM	KILLING OF CELLS OF OTHER ORGANISM	63	0.593006	1.8275	0.000312572	0.00358906	0.00258076	1867	tags=22%, list=10%, signal=20%	4057/4069/85236/57817/8542/2597/5551/140823/3151/64581/4843/8970/10578/2150
GO NEGATIVE REGULATION OF MICROTUBULE POLYMERIZATION OR DEPOLYMERIZATION	NEGATIVE REGULATION OF MICROTUBULE POLYMERIZATION OR DEPOLYMERIZATION	37	-0.640913	-1.89135	0.000313872	0.00359794	0.00258714	3800	tags=65%, list=20%, signal=52%	9181/10013/10300/6904/58526/27124/50810/89927/89795/23332/57551/324/146057/157922/25999/2258/6622/23271/23122/10297/11075/4133/57662/10382
GO RESPONSE TO KETONE	RESPONSE TO KETONE	196	0.451906	1.60413	0.00031485	0.00360311	0.00259086	2483	tags=25%, list=13%, signal=22%	6696/358/4478/4129/7042/857/3371/768/3490/7298/8061/7057/3383/5176/706/1535/1026/3239/5111/196/2706/7097/5021/5764/1843/2353/1019/445/114907/2720/811/7200/7040/54206/5723/1536/1956/387758/1829/10413/1978/5734/7043/5106/4830/5724/5031/10481/367
GO PRESYNAPTIC ACTIVE ZONE CYTOPLASMIC COMPONENT	PRESYNAPTIC ACTIVE ZONE CYTOPLASMIC COMPONENT	16	-0.786269	-1.91472	0.000317954	0.00363254	0.00261202	2899	tags=75%, list=15%, signal=64%	27445/1496/1488/440279/140730/26059/22999/8541/9783/9699/8927/23025
GO HEART PROCESS	HEART PROCESS	282	-0.370648	-1.48378	0.000320798	0.00365638	0.00262916	2268	tags=24%, list=12%, signal=22%	2534/10768/486/6262/783/148/6714/782/7068/7220/785/4634/1908/2740/10142/274/8912/8557/57731/5999/2258/59284/3775/7138/59283/23493/55799/80763/53822/774/6261/7349/6444/477/10659/3761/3760/492/9254/844/4092/781/30845/10368/6323/29119/491/3781/6327/6547/7067/27092/9759/2775/3751/6505/3777/4878/53826/2257/4625/6543/10369/55800/3767/478/30818/30819/1113
GO CARBOHYDRATE DERIVATIVE CATABOLIC PROCESS	CARBOHYDRATE DERIVATIVE CATABOLIC PROCESS	184	0.45163	1.59337	0.000321111	0.00365638	0.00262916	3102	tags=34%, list=16%, signal=29%	2331/633/960/115290/4060/1890/1806/27350/7378/2519/6385/6382/3339/3074/1634/1471/2990/2799/60489/2717/55741/2517/51816/6383/2720/7040/8692/1486/9582/4668/3161/2817/200316/55276/6548/4860/23670/26270/79077/10007/5973/7374/2239/4245/4758/140564/56999/191/27115/2719/978/3094/10082/4521/215/25939/2588/1464/6448/3073/80896/5580
GO POSITIVE REGULATION OF CELL DIVISION	POSITIVE REGULATION OF CELL DIVISION	87	0.534366	1.73584	0.000324438	0.00368264	0.00264804	4349	tags=43%, list=23%, signal=33%	7422/7042/4192/5154/9212/80310/7060/5764/1894/9493/990/998/7040/201161/81606/29127/3481/5008/4904/7043/5155/9928/9270/23636/2246/6840/994/5473/387/54627/3552/3553/6795/7423/847/5586/10755
GO ENDOPLASMIC RETICULUM GOLGI INTERMEDIATE COMPARTMENT	ENDOPLASMIC RETICULUM GOLGI INTERMEDIATE COMPARTMENT	127	0.488899	1.66745	0.000324495	0.00368264	0.00264804	3789	tags=43%, list=20%, signal=35%	871/2335/5265/1075/1522/10945/2706/51226/81671/6890/4924/56005/5034/811/3309/10130/54732/10960/290/2348/11079/29097/8842/50999/11282/10959/340061/9554/149111/57222/222068/51614/6836/10972/10282/10134/10597/1315/90411/90522/374/10652/23071/3998/23423/51014/81562/11018/5771/966/6892/4043/1604/6891/9780
GO REGULATION OF B CELL PROLIFERATION	REGULATION OF B CELL PROLIFERATION	61	0.586681	1.80282	0.000326638	0.00370081	0.00266111	3287	tags=48%, list=17%, signal=40%	972/23529/10451/7305/1026/7037/196/54440/11314/1880/10673/836/4067/2213/958/5788/683/8660/4282/51293/7293/695/4332/3071/4773/3635/3586/5074/3574
GO POSITIVE REGULATION OF SMOOTH MUSCLE CELL MIGRATION	POSITIVE REGULATION OF SMOOTH MUSCLE CELL MIGRATION	38	0.659786	1.87284	0.000328195	0.0037123	0.00266937	2421	tags=50%, list=13%, signal=44%	10631/3488/4192/8826/8840/6352/80310/9510/8829/3673/3037/1902/4193/199/50507/5159/5155/85440/5031
GO MONOCYTE CHEMOTAXIS	MONOCYTE CHEMOTAXIS	63	0.592171	1.82492	0.000332481	0.00375456	0.00269976	2047	tags=25%, list=11%, signal=23%	301/5054/3958/3627/6347/6352/56833/1843/4067/196527/1230/199/6364/3569/4856/5155
GO NEUROTRANSMITTER RECEPTOR TRANSPORT	NEUROTRANSMITTER RECEPTOR TRANSPORT	47	-0.609686	-1.90894	0.000337503	0.00380498	0.00273602	1509	tags=47%, list=8%, signal=43%	1759/56850/3208/3799/163/59283/55227/84896/64854/9912/5602/10368/50632/3800/27092/3798/6616/26052/112755/10369/4983/10815
GO POSITIVE REGULATION OF RECEPTOR SIGNALING PATHWAY VIA STAT	POSITIVE REGULATION OF RECEPTOR SIGNALING PATHWAY VIA STAT	89	0.532895	1.74523	0.000338549	0.00381049	0.00273998	3338	tags=34%, list=17%, signal=28%	9021/3976/7132/23529/6352/8651/1489/83666/11314/5175/3059/3606/4067/958/3588/3280/2149/1545/5008/3569/54625/3587/6774/3575/51094/2261/23568/3586/9466/231
GO POSITIVE REGULATION OF INTERLEUKIN 6 PRODUCTION	POSITIVE REGULATION OF INTERLEUKIN 6 PRODUCTION	94	0.520417	1.71277	0.000342768	0.00385163	0.00276956	3735	tags=41%, list=20%, signal=34%	972/2207/3556/7305/4615/1535/7291/10417/7097/84818/29108/8692/64581/338382/64135/3965/7096/2149/199/2150/388325/3569/11027/6774/5724/10288/3557/6850/136/7474/353514/7098/51311/10392/23586/51284/3552/3553/948
GO REGULATION OF LYMPHOCYTE MEDIATED IMMUNITY	REGULATION OF LYMPHOCYTE MEDIATED IMMUNITY	145	0.472287	1.62684	0.000349197	0.00391743	0.00281688	3323	tags=30%, list=17%, signal=25%	2207/2302/23529/718/567/7037/54440/5819/3077/3606/2217/84868/91543/7040/2213/958/3554/3134/100507436/3133/3965/5788/4277/5777/7133/10459/7855/3569/5817/8772/54795/10859/7784/695/6778/563/3575/7454/7409/3586/8741/146850/9466
GO HOMOPHILIC CELL ADHESION VIA PLASMA MEMBRANE ADHESION MOLECULES	HOMOPHILIC CELL ADHESION VIA PLASMA MEMBRANE ADHESION MOLECULES	166	-0.417216	-1.58002	0.000353543	0.00395969	0.00284726	3061	tags=30%, list=16%, signal=25%	1006/9746/2195/1952/57526/25930/5291/56127/56147/1007/25945/152330/56101/5098/26167/27255/57575/56112/6091/27253/56114/5797/6900/7216/56098/27328/120114/56106/22997/1012/5365/57863/5979/84966/128434/1016/64084/1008/64405/5099/5818/1951/1826/28316/3897/65217/11122/57453/92211
GO REPRODUCTIVE SYSTEM DEVELOPMENT	REPRODUCTIVE SYSTEM DEVELOPMENT	437	0.378487	1.42532	0.000360327	0.00402906	0.00289714	3425	tags=27%, list=18%, signal=23%	301/9021/6696/133/5806/7422/4323/7042/3371/3976/157506/3491/8061/2316/5104/6382/3383/5176/283/6781/1299/4435/1634/3239/10549/7262/8531/2706/1051/3148/3206/3726/1508/5764/9510/6768/4327/8728/836/7026/6615/7425/3309/3020/144455/9820/581/1956/3696/81930/3280/841/5872/259266/1050/3481/10371/10272/51176/79084/10370/8743/7314/5159/2737/10959/4838/578/1594/10265/4257/2296/7855/1495/5155/55224/5311/6932/…
GO INTRINSIC COMPONENT OF ENDOPLASMIC RETICULUM MEMBRANE	INTRINSIC COMPONENT OF ENDOPLASMIC RETICULUM MEMBRANE	158	0.473746	1.64723	0.000362029	0.00404147	0.00290607	5065	tags=50%, list=26%, signal=37%	3122/3123/3115/3113/972/3117/3127/3119/3118/567/54898/23471/3120/6890/51604/811/3309/2923/3134/3133/29927/23344/26608/54344/64834/10195/340061/81502/57222/10269/51614/84888/57414/5311/10134/6238/219855/55829/91319/113419/55831/54499/1798/10026/83460/10237/401494/550/10113/51141/284361/6892/347734/28972/56851/128869/821/662/166929/6891/22845/51283/9695/9451/9524/54463/2542/23065/7993/10328/8818/51…
GO REGULATION OF TOLL LIKE RECEPTOR SIGNALING PATHWAY	REGULATION OF TOLL LIKE RECEPTOR SIGNALING PATHWAY	67	0.578397	1.80957	0.00036403	0.00405719	0.00291737	2100	tags=28%, list=11%, signal=25%	4057/857/23643/929/1535/7097/3659/11314/3665/4067/91543/338382/7128/7096/146722/330/2150/11027/10211
GO NEGATIVE REGULATION OF WOUND HEALING	NEGATIVE REGULATION OF WOUND HEALING	73	0.555887	1.75768	0.000376675	0.00419128	0.00301379	1150	tags=23%, list=6%, signal=22%	5054/302/710/5327/5328/308/5154/5329/7057/5627/1026/11221/114897/7056/135228/7035/928
GO REGULATION OF CLATHRIN DEPENDENT ENDOCYTOSIS	REGULATION OF CLATHRIN DEPENDENT ENDOCYTOSIS	17	-0.765314	-1.87951	0.000377838	0.00419738	0.00301818	2729	tags=65%, list=14%, signal=56%	22848/5291/23208/60682/29978/9829/6457/9026/10188/9892/6456
GO NEGATIVE REGULATION OF VASCULATURE DEVELOPMENT	NEGATIVE REGULATION OF VASCULATURE DEVELOPMENT	116	0.485201	1.64075	0.00037969	0.00421111	0.00302805	2827	tags=31%, list=15%, signal=27%	5054/1284/4223/3627/7042/3202/285/4804/11117/7057/10253/5176/3339/1634/1969/7060/5764/5230/6772/641700/2828/90993/161742/9723/23166/11061/2296/5155/54567/1870/64855/56999/3087/4773/9270/4772
GO VOLTAGE GATED SODIUM CHANNEL COMPLEX	VOLTAGE GATED SODIUM CHANNEL COMPLEX	17	-0.765192	-1.87921	0.000383354	0.00424485	0.00305231	1499	tags=47%, list=8%, signal=43%	8911/8912/6334/6326/6323/6327/6328/55800
GO INTERLEUKIN 2 PRODUCTION	INTERLEUKIN 2 PRODUCTION	64	0.57896	1.78867	0.000385541	0.00426216	0.00306476	3183	tags=39%, list=17%, signal=33%	301/2633/2207/3556/6556/11326/7538/54440/861/3606/84868/64581/7128/942/5788/920/4860/25865/916/947/51564/30968/9308/9454/5074
GO EPITHELIAL CELL DEVELOPMENT	EPITHELIAL CELL DEVELOPMENT	205	0.438927	1.56826	0.000393904	0.00434758	0.00312618	2719	tags=28%, list=14%, signal=24%	7431/4478/7422/3202/7132/7298/2302/8826/2316/6382/3383/59/7852/1903/6781/1026/182/2022/25932/1969/50848/8985/3913/5175/6768/57619/2355/91663/2876/4233/23022/57103/80781/29842/2828/5908/2260/406/5872/54507/6608/1021/11061/1003/2150/54345/6009/5155/4643/2810/10481/367/2683/5420/7474/9076/5906
GO POSITIVE REGULATION OF COAGULATION	POSITIVE REGULATION OF COAGULATION	28	0.709763	1.88151	0.000394993	0.00435257	0.00312977	1464	tags=32%, list=8%, signal=30%	10630/5054/2152/7057/50848/7056/196527/5341/2149
GO NEGATIVE REGULATION OF T CELL DIFFERENTIATION	NEGATIVE REGULATION OF T CELL DIFFERENTIATION	43	0.633281	1.83377	0.000395809	0.00435454	0.00313119	2433	tags=40%, list=13%, signal=35%	301/972/4192/2302/8651/10875/3659/861/84695/2737/864/2064/51043/3566/3718/80149/865
GO POSITIVE REGULATION OF CYTOKINE SECRETION	POSITIVE REGULATION OF CYTOKINE SECRETION	138	0.477484	1.63634	0.000397599	0.0043672	0.00314029	2715	tags=30%, list=14%, signal=26%	10631/6288/4192/965/23601/3556/929/79792/834/7291/8764/7097/2597/84868/84818/9590/29108/8692/914/64135/3965/7096/29126/2149/199/5008/3661/83786/2150/7855/5734/2268/11027/4282/3566/947/6850/247/117854/7474/353514/26253
GO HYDROLASE ACTIVITY ACTING ON ACID PHOSPHORUS NITROGEN BONDS	HYDROLASE ACTIVITY ACTING ON ACID PHOSPHORUS NITROGEN BONDS	179	0.44695	1.56814	0.000409501	0.00449071	0.0032291	1874	tags=16%, list=10%, signal=14%	4057/4318/715/5327/5328/716/2152/3426/51279/54504/4313/1075/11098/94031/3240/1675/6768/717/59342/5476/1803/3001/4316/1636/3082/5547/8192/5122
GO MEIOTIC CELL CYCLE PROCESS	MEIOTIC CELL CYCLE PROCESS	184	0.449442	1.58565	0.000411315	0.00450337	0.0032382	3494	tags=28%, list=18%, signal=23%	991/9232/3976/7153/1164/6790/2827/699/10051/83540/5347/23397/701/9319/7272/811/84057/5888/995/81930/8438/259266/55706/10609/151648/151246/7314/9700/7283/10096/4627/2177/84944/378708/3364/4487/26271/7474/146956/51441/993/2067/898/83990/994/2175/201254/9918/100130958/25788/29893
GO TYROSINE PHOSPHORYLATION OF STAT PROTEIN	TYROSINE PHOSPHORYLATION OF STAT PROTEIN	81	0.531895	1.71189	0.0004273	0.0046709	0.00335867	2243	tags=26%, list=12%, signal=23%	9021/857/3976/7132/23529/6352/8651/1489/83666/5175/3059/3606/4067/958/3280/5008/3569/54625/10019/6774/3718
GO TISSUE REGENERATION	TISSUE REGENERATION	73	0.555235	1.75562	0.000428886	0.00468075	0.00336575	2034	tags=30%, list=11%, signal=27%	301/10631/4192/891/5738/10404/59352/2596/1026/8324/5764/11221/2876/57190/928/2146/5315/10413/7048/5782/3475/4856
GO EPIDERMIS DEVELOPMENT	EPIDERMIS DEVELOPMENT	462	0.376121	1.42268	0.000452688	0.00493264	0.00354688	3154	tags=16%, list=16%, signal=14%	301/2171/3488/2012/7042/6424/5266/5154/55504/7538/1513/182/5351/1475/8323/25932/1969/8985/861/7357/6768/1490/2355/836/3204/1382/1514/6615/23022/8754/826/135228/5920/3065/54206/1956/8717/3280/2260/3858/6608/23764/2146/3229/1829/51083/10413/4831/9620/4665/1594/10555/22943/2296/54345/3728/10269/60401/5744/2319/865/2810/10481/247/51384/7474/9333/9119/10468/7454/6662/823/2735/5493/9497/3875
GO HISTONE H3 K9 DEMETHYLATION	HISTONE H3 K9 DEMETHYLATION	14	-0.808902	-1.90173	0.000454563	0.00494518	0.00355589	1631	tags=50%, list=9%, signal=46%	5253/80853/51780/23030/55806/3299/221037
GO NEGATIVE REGULATION OF NUCLEAR DIVISION	NEGATIVE REGULATION OF NUCLEAR DIVISION	59	0.571745	1.74879	0.000457678	0.00497115	0.00357456	2180	tags=31%, list=11%, signal=27%	991/9232/891/3976/9212/10403/699/5347/1843/1063/10040/701/9319/7272/4085/1111/10459/81620
GO TRANSFORMING GROWTH FACTOR BETA RECEPTOR SIGNALING PATHWAY	TRANSFORMING GROWTH FACTOR BETA RECEPTOR SIGNALING PATHWAY	177	0.451449	1.58054	0.000464818	0.0050407	0.00362457	2092	tags=24%, list=11%, signal=22%	2331/1281/1278/9518/114990/7042/857/4015/255743/11117/7791/7057/3675/858/4435/2022/94031/7041/57045/50848/2615/3725/4052/2353/8754/135228/3309/7040/2348/54829/7044/4053/10370/7314/7048/4838/3693/94/1003/7043/56937/27122/6386
GO CONDENSED CHROMOSOME OUTER KINETOCHORE	CONDENSED CHROMOSOME OUTER KINETOCHORE	14	0.819508	1.83886	0.000467721	0.00506414	0.00364143	961	tags=57%, list=5%, signal=54%	891/10403/699/5347/220134/1063/221150/701
GO ER TO GOLGI TRANSPORT VESICLE MEMBRANE	ER TO GOLGI TRANSPORT VESICLE MEMBRANE	55	0.596184	1.78888	0.000470102	0.00508187	0.00365418	3026	tags=44%, list=16%, signal=37%	3122/3123/3115/3113/972/3117/3127/3119/3118/567/3120/9871/2348/3134/3133/10959/9554/149111/10972/90411/374/553115/3998/51014
GO DENDRITE EXTENSION	DENDRITE EXTENSION	33	-0.648484	-1.87223	0.000480349	0.00518443	0.00372793	2326	tags=45%, list=12%, signal=40%	151835/8437/5071/9362/84258/59284/22999/10479/26999/57699/9699/6857/6860/23025/6456
GO CALCIUM ION TRANSMEMBRANE TRANSPORT	CALCIUM ION TRANSMEMBRANE TRANSPORT	325	-0.352949	-1.42461	0.000482643	0.00520097	0.00373982	2806	tags=27%, list=15%, signal=23%	808/4976/9722/91404/23007/3064/776/2259/3358/287/2906/775/3306/7222/2534/79085/6262/783/8416/782/2903/23413/7220/785/5332/27112/6376/2904/11141/23228/57165/8911/28954/274/8912/3208/25769/123041/59284/286097/6348/6622/59283/55799/10367/774/1394/777/6261/477/8398/2905/2823/79026/492/9254/64805/3356/844/9651/5334/4644/781/30845/10368/5027/491/5581/773/55636/57419/8787/6547/23236/27092/9472/116443/25…
GO CALMODULIN BINDING	CALMODULIN BINDING	201	-0.397334	-1.53793	0.000483825	0.00520211	0.00374064	2510	tags=32%, list=13%, signal=28%	118/23352/775/9495/7082/6711/5153/3786/6262/79598/84254/5116/3756/57172/22989/440279/157922/28954/5530/9066/5999/8573/4628/5924/65108/4651/114/23271/6261/6709/814/5136/8398/6844/79784/4082/119/139728/492/1612/5532/56479/4644/491/4900/120/3780/57118/818/3781/6547/6857/79012/23236/4155/4133/815/57662/3782/3785/4625/6543/23025/10777/2902
GO PROTEOGLYCAN BINDING	PROTEOGLYCAN BINDING	36	0.660169	1.83886	0.000484271	0.00520211	0.00374064	1494	tags=44%, list=8%, signal=41%	10457/3371/2335/1289/7057/1513/1520/3075/1508/5764/51816/50509/1514/3673/4811/5788
GO REGULATION OF CHOLESTEROL BIOSYNTHETIC PROCESS	REGULATION OF CHOLESTEROL BIOSYNTHETIC PROCESS	43	-0.606912	-1.85762	0.000488831	0.00524285	0.00376993	3178	tags=47%, list=17%, signal=39%	4800/4598/10654/6309/6720/4801/57678/2222/4047/9619/31/3156/4597/348/7108/6721/3157/3422/2194/6319
GO STRUCTURAL CONSTITUENT OF SKIN EPIDERMIS	STRUCTURAL CONSTITUENT OF SKIN EPIDERMIS	13	0.847403	1.8728	0.00049241	0.00527296	0.00379158	1431	tags=15%, list=7%, signal=14%	5266/3858
GO NEGATIVE REGULATION OF CHROMOSOME SEGREGATION	NEGATIVE REGULATION OF CHROMOSOME SEGREGATION	44	0.631395	1.82841	0.000494972	0.00529209	0.00380534	2529	tags=39%, list=13%, signal=34%	991/9232/891/9212/10403/699/5347/1843/1063/701/9319/7272/4085/9700/10459/81620/26271
GO CELLULAR DEFENSE RESPONSE	CELLULAR DEFENSE RESPONSE	51	0.596025	1.76473	0.000497761	0.00531359	0.0038208	2504	tags=39%, list=13%, signal=34%	4046/23601/23643/8061/7305/728/3959/10312/3688/4283/5551/4688/1234/653361/10871/10578/8915/10288/4332/136
GO REGULATION OF PEPTIDYL TYROSINE PHOSPHORYLATION	REGULATION OF PEPTIDYL TYROSINE PHOSPHORYLATION	251	0.412206	1.49942	0.000512835	0.00546597	0.00393037	2070	tags=25%, list=11%, signal=23%	9021/7422/972/960/857/3678/3976/7132/5154/23529/8826/3383/54209/6352/8651/6464/1489/80310/3689/83666/8764/7060/11314/30844/5175/3059/3606/134/8829/2209/4067/7040/54206/284/8692/958/1636/1956/3280/9961/5788/653361/920/50507/3481/9052/5008/683/3082/4739/64092/1839/5777/1942/3569/54625/54892/916/5912/4282/5155/3690/10019
GO PHOSPHATIDYLINOSITOL ACYL CHAIN REMODELING	PHOSPHATIDYLINOSITOL ACYL CHAIN REMODELING	19	0.770648	1.87669	0.000514356	0.00547364	0.00393589	1886	tags=26%, list=10%, signal=24%	5320/5322/79887/5321/79143
GO DEVELOPMENTAL GROWTH INVOLVED IN MORPHOGENESIS	DEVELOPMENTAL GROWTH INVOLVED IN MORPHOGENESIS	231	-0.385644	-1.50774	0.00051533	0.00547548	0.00393721	2331	tags=29%, list=12%, signal=25%	2803/151835/2932/8437/6792/4040/1630/5071/54413/23105/7074/7473/5048/4916/57698/9362/659/118813/652/10507/9839/51199/10500/10509/84258/1901/2258/5802/57216/59284/22999/10479/56920/4851/348/57715/64218/5532/22902/223117/10439/26999/5590/65078/8153/57699/4099/9699/6857/214/6860/4133/4692/1826/85407/4137/10501/8851/23025/3897/23769/7477/6585/6456/7143/6423
GO CLATHRIN SCULPTED VESICLE	CLATHRIN SCULPTED VESICLE	12	-0.821138	-1.85626	0.000517237	0.00548721	0.00394565	2212	tags=67%, list=12%, signal=59%	80331/140679/2572/6844/2571/5864/6857/57030
GO T CELL MIGRATION	T CELL MIGRATION	67	0.570174	1.78384	0.000521542	0.00551824	0.00396796	3976	tags=43%, list=21%, signal=34%	3627/4478/6347/3383/6352/4267/8764/50848/6373/1880/29108/1893/199/58191/3676/6364/8772/3683/64005/7474/8740/9466/5293/387/6693/5294/11035/729230/284114
GO DENDRITIC CELL DIFFERENTIATION	DENDRITIC CELL DIFFERENTIATION	41	0.643597	1.84492	0.000522585	0.00551824	0.00396796	2328	tags=41%, list=12%, signal=36%	28959/55365/54209/1051/55509/6688/4055/4067/2213/5971/3965/116071/10538/7048/2150/10859/10288
GO REGULATION OF ANTIGEN PROCESSING AND PRESENTATION	REGULATION OF ANTIGEN PROCESSING AND PRESENTATION	20	0.759626	1.87295	0.000522585	0.00551824	0.00396796	3299	tags=70%, list=17%, signal=58%	972/3111/6556/7057/54209/10875/3077/29108/2213/55080/10288/968/7454/10392
GO OSTEOBLAST DIFFERENTIATION	OSTEOBLAST DIFFERENTIATION	210	0.438896	1.56662	0.000524374	0.00552629	0.00397375	2696	tags=33%, list=14%, signal=29%	4057/1277/1192/3486/6696/10457/3488/3371/4015/255743/3381/9902/115908/1052/56975/23601/6474/3491/7171/8840/25937/4435/182/7291/6591/57045/1291/1051/1969/10312/9260/3726/51374/8321/6615/3199/54857/3020/8519/5701/90993/6608/1021/1050/3481/51176/3082/2737/285590/5978/3569/4921/3399/5744/9464/79697/54795/6238/338773/169200/5245/865/3336/374/6209/26271/2274/55973/51564
GO OXIDOREDUCTASE ACTIVITY ACTING ON THE CH NH2 GROUP OF DONORS OXYGEN AS ACCEPTOR	OXIDOREDUCTASE ACTIVITY ACTING ON THE CH NH2 GROUP OF DONORS OXYGEN AS ACCEPTOR	16	0.793899	1.85087	0.000524966	0.00552629	0.00397375	2431	tags=50%, list=13%, signal=44%	4129/4015/4017/4016/84695/259307/84171/7412
GO FAT SOLUBLE VITAMIN METABOLIC PROCESS	FAT SOLUBLE VITAMIN METABOLIC PROCESS	43	0.625632	1.81162	0.000526461	0.00553351	0.00397894	3594	tags=40%, list=19%, signal=32%	5947/873/1593/6591/79001/6615/5360/2260/1381/1594/6017/9227/57834/7421/4790/5641/3553
GO NEGATIVE REGULATION OF CELL PROJECTION ORGANIZATION	NEGATIVE REGULATION OF CELL PROJECTION ORGANIZATION	177	-0.407468	-1.55689	0.00052839	0.00554525	0.00398738	2307	tags=33%, list=12%, signal=30%	7025/2932/2534/23108/1809/79598/1630/54413/23105/1949/7473/5048/22871/23189/146760/22891/5217/2904/22876/51466/10507/3397/25791/5530/10500/10509/8831/7248/2258/5802/9693/1400/5909/23258/349667/115704/56920/348/4168/57715/5365/9912/64218/22902/223117/6695/65078/4099/4038/11075/4133/952/4974/84894/10501/26052/112755/8851/7143
GO LONG TERM SYNAPTIC DEPRESSION	LONG TERM SYNAPTIC DEPRESSION	31	-0.668773	-1.88762	0.000531988	0.00557445	0.00400838	1397	tags=48%, list=7%, signal=45%	25769/114/85358/57406/9162/55607/22986/2895/22941/6812/2890/952/4137/869/3745
GO RECEPTOR COMPLEX	RECEPTOR COMPLEX	394	-0.340099	-1.38825	0.000541524	0.00566568	0.00407398	1919	tags=21%, list=10%, signal=20%	22853/118427/7220/2051/4916/22871/2911/659/134957/3815/5364/4306/2904/2560/388336/3977/7804/51559/2065/5799/3563/3480/59284/10580/85358/1741/59283/55227/284656/1742/2558/51704/4851/57406/93/2561/2905/7108/5365/9127/10368/2066/5979/2900/26050/1271/51555/2554/1740/50944/7253/53353/2895/2892/22941/1141/1137/27092/116443/2890/214/5156/7018/9244/2898/84059/10203/2566/10369/4915/2565/2047/117/2556/7299…
GO REGULATION OF LYMPHOCYTE DIFFERENTIATION	REGULATION OF LYMPHOCYTE DIFFERENTIATION	168	0.453838	1.57972	0.000542512	0.00566734	0.00407517	3451	tags=33%, list=18%, signal=27%	301/4323/972/4192/2302/3111/8651/56833/10875/3659/11221/54440/861/3606/84695/678/914/64332/3965/10385/942/5788/4860/3559/7048/2737/27166/864/5777/2064/11006/150372/51043/3566/2177/3718/10288/80149/865/6850/695/3071/3575/4773/2175/3635/3142/9308/3574/146850/387/639/677/2736/5771
GO NEGATIVE REGULATION OF HEMOPOIESIS	NEGATIVE REGULATION OF HEMOPOIESIS	151	0.46294	1.60031	0.000544688	0.00567367	0.00407972	2684	tags=30%, list=14%, signal=26%	301/4057/972/4192/3202/28959/2302/55365/714/7538/8651/10875/3659/861/3204/84695/4067/2213/3280/8365/1021/8294/10272/4831/2737/864/84959/2064/3276/4211/11006/54892/51043/3566/6988/10221/4830/3718/10859/80149/865/10234/3218/3205/7098
GO EPITHELIAL CELL PROLIFERATION	EPITHELIAL CELL PROLIFERATION	385	0.391035	1.46335	0.000544778	0.00567367	0.00407972	2974	tags=29%, list=16%, signal=25%	3486/3488/7422/4323/7042/2173/4192/857/2152/3202/3915/6347/3162/3912/1295/4804/4017/7057/3487/5176/283/728/858/7538/1535/6352/567/1948/1992/8862/7291/6591/1051/3148/187/1969/7060/9104/8324/5764/3725/11221/1296/6772/128239/2876/7026/56005/998/6195/8829/135228/7040/3037/54206/2896/1893/581/1956/3280/2260/7128/6608/1021/10413/79084/4831/11061/6776/25865/3082/4838/94/864/2064/3676/4856/5155/3690/4163…
GO INNER MITOCHONDRIAL MEMBRANE PROTEIN COMPLEX	INNER MITOCHONDRIAL MEMBRANE PROTEIN COMPLEX	123	0.483576	1.65099	0.000546116	0.00567895	0.00408351	5986	tags=59%, list=31%, signal=41%	55013/56901/140823/9551/84419/440567/400916/4696/4725/27089/515/518/4697/514/7386/55101/4713/134266/440574/6392/7388/6390/54927/125988/10476/51079/4695/1337/4707/4708/79135/29796/9377/84701/4717/131118/4711/4700/10989/55967/516/4710/4709/26519/10440/4728/4694/10632/4706/135154/4701/4712/29928/4726/55750/9556/790955/4729/90871/83943/522/7384/90580/4702/513/539/1537/4731/54539/126328/506/267020/521
GO REGULATION OF ENDOTHELIAL CELL MIGRATION	REGULATION OF ENDOTHELIAL CELL MIGRATION	155	0.459281	1.59366	0.000547091	0.00568043	0.00408458	3458	tags=35%, list=18%, signal=29%	301/4223/27286/7422/3315/7114/3162/285/7057/57381/5176/6781/1634/7101/1969/6672/5764/5606/7026/8829/4233/811/7040/284/2896/958/2013/2260/161742/2821/6776/25865/5547/94/1942/3728/5155/3690/54567/374969/80149/56999/5743/7474/51564/9270/2246/2324/4780/5025/6915/3791/387/284361
GO CELLULAR RESPONSE TO COPPER ION	CELLULAR RESPONSE TO COPPER ION	26	0.716992	1.89555	0.000552443	0.0057273	0.00411828	1693	tags=35%, list=9%, signal=32%	358/4499/4493/4504/4502/4489/84557/4496/4495
GO RESPONSE TO ACETYLCHOLINE	RESPONSE TO ACETYLCHOLINE	29	-0.683058	-1.90077	0.000556352	0.00575909	0.00414114	760	tags=28%, list=4%, signal=27%	1132/1141/1137/23236/4062/1128/11255/8851
GO HOMOTYPIC CELL CELL ADHESION	HOMOTYPIC CELL CELL ADHESION	81	0.526625	1.69493	0.000557521	0.005761	0.00414252	2148	tags=33%, list=11%, signal=30%	10630/1192/3956/3315/10627/2316/10398/6352/4267/50848/114897/3043/83706/4067/1465/928/5341/60/1829/5777/84959/3728/5912/71/3690/10019/4627
GO FIBRILLAR COLLAGEN TRIMER	FIBRILLAR COLLAGEN TRIMER	12	0.831514	1.80326	0.000558223	0.005761	0.00414252	1314	tags=67%, list=7%, signal=62%	1281/1277/1278/1290/4060/1289/50509/8685
GO AXONAL GROWTH CONE	AXONAL GROWTH CONE	28	-0.677327	-1.86534	0.000560607	0.00577688	0.00415393	2481	tags=54%, list=13%, signal=47%	4649/9344/7074/57698/22906/51199/3799/9479/56288/2823/10439/5727/65078/3800/3897
GO VOLTAGE GATED SODIUM CHANNEL ACTIVITY	VOLTAGE GATED SODIUM CHANNEL ACTIVITY	23	-0.723095	-1.89929	0.00056215	0.00578405	0.00415909	1576	tags=48%, list=8%, signal=44%	348980/8911/8912/57657/6334/6326/610/6323/6327/6328/55800
GO GOLGI ASSOCIATED VESICLE	GOLGI ASSOCIATED VESICLE	174	0.450992	1.57428	0.000564072	0.00579509	0.00416703	3734	tags=35%, list=20%, signal=28%	3122/3123/3115/3113/972/3117/5265/3127/3119/3118/11015/567/1075/1522/10945/11014/51226/3120/9871/4924/26511/54732/10960/23433/2348/3134/3133/50999/5872/10959/9554/149111/57222/222068/51614/84888/10972/1315/90411/4218/90522/374/2697/113419/553115/1174/3998/23423/51014/81562/81555/11316/11018/966/120892/22872/375/5045/51324/9903/22818
GO POSITIVE REGULATION OF CELL PROJECTION ORGANIZATION	POSITIVE REGULATION OF CELL PROJECTION ORGANIZATION	382	-0.340604	-1.39066	0.000565313	0.00579913	0.00416993	2331	tags=26%, list=12%, signal=23%	2803/151835/5649/2534/89795/8437/6792/221914/23426/1809/6091/5071/6714/5168/146206/26039/7074/2909/153090/7473/5048/4916/55754/57698/22871/9362/659/118813/8997/3815/5364/27/324/6376/2033/11141/6453/57498/55704/22906/10507/9839/7804/51199/126520/84258/8874/202018/100132074/5064/2648/59284/22999/9693/85358/2660/9148/1742/322/348/51761/2823/5365/64805/22902/65009/23373/55607/5979/5027/91752/9231/527…
GO POSITIVE REGULATION OF LYMPHOCYTE MEDIATED IMMUNITY	POSITIVE REGULATION OF LYMPHOCYTE MEDIATED IMMUNITY	101	0.504452	1.68544	0.000574546	0.00587968	0.00422785	2523	tags=28%, list=13%, signal=24%	2207/23529/718/567/7037/54440/5819/3077/3606/2217/91543/7040/958/3554/3134/100507436/3133/5788/4277/10459/7855/3569/5817/8772/7784/695/6778/563
GO CHROMATIN REMODELING AT CENTROMERE	CHROMATIN REMODELING AT CENTROMERE	48	0.6158	1.80188	0.000574887	0.00587968	0.00422785	4034	tags=54%, list=21%, signal=43%	79682/1058/55355/64105/11339/79019/3020/201161/387103/64946/23421/8365/8294/55839/91687/378708/5928/57082/2491/54107/201254/55320/8363/8367/8607/54069
GO BONE DEVELOPMENT	BONE DEVELOPMENT	217	0.426517	1.52967	0.000577266	0.00589519	0.00423901	3052	tags=30%, list=16%, signal=26%	4057/302/1292/1277/871/633/4323/6424/4015/56975/6474/7305/64856/8840/5358/6781/7291/2022/1291/9104/1293/79001/25886/64175/196527/3037/4147/3214/54/5479/5788/7373/1303/7048/4665/2737/285590/2296/5777/9249/7059/5734/7043/4211/10269/5251/10019/22856/338773/8642/10859/10163/10234/642658/4487/2697/2261/116039/85301/6662/5447/1749/3207/389058/7289/80263
GO REGULATION OF CELL MORPHOGENESIS	REGULATION OF CELL MORPHOGENESIS	488	-0.323803	-1.34362	0.000588439	0.00600032	0.0043146	2821	tags=32%, list=15%, signal=28%	2035/51760/152503/57688/57556/5728/4976/79791/2245/192670/57611/10084/1399/7750/4649/283149/23098/57194/2803/151835/254065/9344/2932/84446/5649/2039/2534/253725/54014/8437/6792/23221/10716/23268/23426/10152/6091/1630/115703/5071/10428/6714/5168/54413/7430/26039/1793/23105/7074/57520/1949/2909/7473/5048/4916/57698/22871/23189/9362/659/118813/6900/8997/3815/5364/114793/11141/157922/23053/22906/1050…
GO REGULATION OF CELL SHAPE	REGULATION OF CELL SHAPE	155	0.458712	1.59169	0.000592954	0.00603735	0.00434123	3885	tags=40%, list=20%, signal=32%	10630/301/4478/7422/2335/6347/3679/6284/3383/57381/54751/389/3074/5880/93663/3689/50848/5764/57619/103910/998/29984/5028/6285/390/2242/23433/1902/23129/9948/10395/9723/148170/3055/2059/7940/2268/10269/4627/391/29780/1729/10602/11151/54873/23191/55843/8994/55742/11149/989/55171/752/3791/387/1605/51177/6354/23654/10979/5879/5962
GO ACTION POTENTIAL	ACTION POTENTIAL	127	-0.428088	-1.58625	0.000597592	0.00607551	0.00436867	3570	tags=38%, list=19%, signal=31%	6324/2332/6546/3752/2776/27345/388591/23171/6330/3736/9722/3737/776/287/775/57369/6262/783/148/4916/8911/10142/274/8912/2258/288/6334/477/79784/6326/3760/781/610/6323/29119/3781/6327/1141/1137/9472/3751/2898/2257/6328/4915/55800/3745/30819
GO CYSTEINE TYPE ENDOPEPTIDASE INHIBITOR ACTIVITY	CYSTEINE TYPE ENDOPEPTIDASE INHIBITOR ACTIVITY	57	0.597449	1.81031	0.000600504	0.00609606	0.00438344	2538	tags=30%, list=13%, signal=26%	4057/9232/332/114769/4504/1800/1471/1475/6195/831/8530/51176/330/10406/1476/8996/25816
GO IGG BINDING	IGG BINDING	10	0.869461	1.81464	0.000606354	0.00614631	0.00441958	1076	tags=60%, list=6%, signal=57%	2214/2207/2212/2217/2209/2213
GO NEGATIVE REGULATION OF LYMPHOCYTE DIFFERENTIATION	NEGATIVE REGULATION OF LYMPHOCYTE DIFFERENTIATION	53	0.602975	1.80298	0.000613088	0.00620536	0.00446204	2433	tags=32%, list=13%, signal=28%	301/972/4192/2302/8651/10875/3659/861/84695/2737/864/2064/51043/3566/3718/80149/865
GO CD4 POSITIVE ALPHA BETA T CELL ACTIVATION	CD4 POSITIVE ALPHA BETA T CELL ACTIVATION	91	0.530836	1.74536	0.000618687	0.00623961	0.00448666	3044	tags=36%, list=16%, signal=31%	301/602/8651/57045/10312/54440/861/3606/1880/84695/91543/5971/64332/3965/942/29126/51176/10538/7048/864/5734/3569/51043/3566/6774/3718/80149/865/6778/3071/30968/3142/9308
GO REGULATION OF ALPHA BETA T CELL ACTIVATION	REGULATION OF ALPHA BETA T CELL ACTIVATION	91	0.53026	1.74347	0.000618687	0.00623961	0.00448666	3683	tags=40%, list=19%, signal=32%	301/8651/57045/8764/3659/54440/861/11314/3077/3606/84695/64332/3133/3965/942/29126/5788/4860/7048/2737/864/916/51043/3566/3718/10859/80149/865/6850/3071/3142/9308/387/639/1604/384
GO GOLGI CIS CISTERNA	GOLGI CIS CISTERNA	25	-0.707551	-1.88447	0.000619212	0.00623961	0.00448666	2137	tags=28%, list=11%, signal=25%	3996/64131/440270/51062/23015/55512/51617
GO FIBRONECTIN BINDING	FIBRONECTIN BINDING	27	0.707421	1.8789	0.000625987	0.00629859	0.00452908	2507	tags=70%, list=13%, signal=61%	3486/3488/7422/6385/7057/2192/3675/1513/1520/3489/3688/1490/1514/84695/10272/3676/3690/284297/3685
GO CLATHRIN COATED ENDOCYTIC VESICLE MEMBRANE	CLATHRIN COATED ENDOCYTIC VESICLE MEMBRANE	38	0.645855	1.8333	0.000627257	0.00630208	0.00453159	1150	tags=37%, list=6%, signal=35%	3122/3123/3115/3113/972/3117/3127/3119/3118/1175/3120/2535/2209/928
GO MITOTIC DNA REPLICATION	MITOTIC DNA REPLICATION	15	0.798779	1.8297	0.00063891	0.00640974	0.004609	2467	tags=73%, list=13%, signal=64%	4171/8318/9837/5888/2260/4175/11200/4172/10269/4173/3978
GO NEUROINFLAMMATORY RESPONSE	NEUROINFLAMMATORY RESPONSE	66	0.554805	1.72879	0.000644849	0.00645984	0.00464502	2905	tags=41%, list=15%, signal=35%	4318/10135/712/7305/54209/728/1075/3689/7097/3725/25825/3606/2896/1191/8530/1956/6608/199/5788/8877/284467/7133/3569/5743/7098/3684/51311
GO TOLL LIKE RECEPTOR 3 SIGNALING PATHWAY	TOLL LIKE RECEPTOR 3 SIGNALING PATHWAY	20	0.755988	1.86398	0.000646028	0.00646217	0.0046467	2684	tags=65%, list=14%, signal=56%	857/81622/23180/84868/81035/7128/841/8737/2150/388325/10211/8772/7098
GO AMINOGLYCAN CATABOLIC PROCESS	AMINOGLYCAN CATABOLIC PROCESS	65	0.553769	1.71846	0.000648341	0.00647583	0.00465652	3037	tags=43%, list=16%, signal=36%	2331/633/960/4060/6385/6382/3339/3074/1634/2990/2799/2517/6383/2720/7040/8692/1486/3161/2817/6548/23670/2239/2719/10082/2588/1464/6448/3073
GO ELECTRON TRANSPORT CHAIN	ELECTRON TRANSPORT CHAIN	169	0.45469	1.58203	0.000654143	0.00652425	0.00469134	4654	tags=44%, list=24%, signal=33%	4129/891/4017/1535/56901/983/2745/83442/1728/84419/1536/4688/8974/440567/1534/4696/4725/653361/50507/27089/1340/54205/316/1349/1346/9249/10975/51022/4697/7386/4713/6392/7388/6390/128/8560/1329/51079/4695/10165/5447/1337/4707/4708/29796/3620/8574/9377/388753/84701/231/2936/2230/4717/112812/4711/1351/1588/4700/23498/55967/10327/1347/4710/4709/4728/4694/4835/2819/4706/4701/4712/4726/7296
GO REGULATION OF MAST CELL ACTIVATION	REGULATION OF MAST CELL ACTIVATION	40	0.625155	1.77871	0.000655187	0.00652513	0.00469197	2504	tags=48%, list=13%, signal=41%	3598/3162/5359/2207/8673/5880/1268/11314/5819/4067/2242/3965/146722/284021/2268/3566/30817/6850/136
GO NEGATIVE REGULATION OF METAPHASE ANAPHASE TRANSITION OF CELL CYCLE	NEGATIVE REGULATION OF METAPHASE ANAPHASE TRANSITION OF CELL CYCLE	37	0.65989	1.85622	0.000657319	0.00653683	0.00470039	2529	tags=41%, list=13%, signal=35%	991/891/9212/10403/699/5347/1843/1063/701/9319/7272/4085/10459/81620/26271
GO CEREBELLAR CORTEX MORPHOGENESIS	CEREBELLAR CORTEX MORPHOGENESIS	30	-0.650433	-1.81154	0.000659497	0.00654081	0.00470325	2032	tags=47%, list=11%, signal=42%	5270/5781/22891/8861/51286/8925/85442/64211/2895/869/23017/4983/6712/28514
GO JUXTAPARANODE REGION OF AXON	JUXTAPARANODE REGION OF AXON	10	-0.856135	-1.87016	0.000659634	0.00654081	0.00470325	2763	tags=100%, list=14%, signal=86%	3737/22933/6900/23136/8514/7881/1742/1740/26047
GO NODE OF RANVIER	NODE OF RANVIER	15	-0.795456	-1.91519	0.000669427	0.0066283	0.00476616	2251	tags=67%, list=12%, signal=59%	3786/6900/274/57731/288/6334/6326/6323/6695/3785
GO DETOXIFICATION OF INORGANIC COMPOUND	DETOXIFICATION OF INORGANIC COMPOUND	16	0.788758	1.83888	0.000671465	0.00663886	0.00477375	2445	tags=50%, list=13%, signal=44%	4499/4493/4504/4502/4489/4496/4495/4494
GO CENTROMERE COMPLEX ASSEMBLY	CENTROMERE COMPLEX ASSEMBLY	56	0.578064	1.74202	0.000674412	0.00664875	0.00478086	4359	tags=55%, list=23%, signal=43%	79682/1058/55355/1063/64105/11339/79019/3020/201161/387103/64946/23421/8365/8294/55839/91687/1062/378708/5928/57082/2491/54107/201254/55320/5925/8363/8367/8607/54069/79003/79172
GO POSITIVE REGULATION OF CYTOKINE PRODUCTION INVOLVED IN IMMUNE RESPONSE	POSITIVE REGULATION OF CYTOKINE PRODUCTION INVOLVED IN IMMUNE RESPONSE	56	0.578605	1.74365	0.000674412	0.00664875	0.00478086	2581	tags=36%, list=13%, signal=31%	972/2207/567/10417/8764/54440/3606/91543/3554/3134/3133/2150/7855/388325/3569/4282/8915/10859/117854/7474
GO MACROPHAGE MIGRATION	MACROPHAGE MIGRATION	50	0.602832	1.7808	0.00068042	0.00669831	0.0048165	1315	tags=30%, list=7%, signal=28%	5919/3958/6288/4323/4192/6347/11117/7057/54209/728/6352/56833/928/51192/719
GO RESPONSE TO PROGESTERONE	RESPONSE TO PROGESTERONE	45	0.616967	1.78888	0.000704088	0.00692134	0.00497687	1936	tags=33%, list=10%, signal=30%	7042/857/7298/8061/7057/706/2706/7097/5021/5764/2353/7040/1829/10413/7043
GO REGULATION OF SISTER CHROMATID SEGREGATION	REGULATION OF SISTER CHROMATID SEGREGATION	79	0.536433	1.72005	0.000705879	0.00692897	0.00498236	2529	tags=32%, list=13%, signal=28%	991/9232/891/10783/9212/9787/10460/10403/699/5347/1843/1063/990/701/9319/7272/4085/113130/116028/9700/1062/10459/81620/51529/26271
GO REGULATION OF MONOCYTE CHEMOTAXIS	REGULATION OF MONOCYTE CHEMOTAXIS	25	0.719092	1.88559	0.000711865	0.0069777	0.0050174	2034	tags=40%, list=11%, signal=36%	5054/3627/6352/56833/1843/4067/196527/1230/199/4856
GO SPINDLE POLE	SPINDLE POLE	161	0.450382	1.56463	0.00072344	0.00706734	0.00508186	3928	tags=37%, list=21%, signal=29%	991/84722/891/22974/10783/9212/9787/6790/81610/10460/4751/1263/9055/26524/25886/5347/1063/990/150468/642273/79980/4085/115106/259266/151648/54820/284403/4739/79998/7283/10615/10733/121441/84902/91272/10636/9735/26586/83473/11186/23636/644943/90417/3832/994/8409/93323/255758/79000/55171/114327/54627/4957/2010/199953/9903/1499/6795/805
GO VOLTAGE GATED CALCIUM CHANNEL ACTIVITY	VOLTAGE GATED CALCIUM CHANNEL ACTIVITY	48	-0.569242	-1.81014	0.000724065	0.00706734	0.00508186	2543	tags=48%, list=13%, signal=42%	776/775/783/8416/782/23413/785/11141/8911/8912/59284/59283/55799/774/777/6261/9254/781/10368/773/27092/9256/10369
GO RAS GUANYL NUCLEOTIDE EXCHANGE FACTOR ACTIVITY	RAS GUANYL NUCLEOTIDE EXCHANGE FACTOR ACTIVITY	137	-0.425283	-1.59499	0.000724113	0.00706734	0.00508186	3397	tags=35%, list=18%, signal=29%	10160/55667/115557/57139/23365/6654/5866/81846/10125/2245/80243/389337/9826/23268/23263/10411/126003/1793/55160/7074/29/6655/8997/6453/25791/9649/54453/8874/5924/9771/9693/160518/23258/26030/23101/23229/4168/6305/9828/85442/50649/8567/117177/1795/613/5923/10276/11069
GO SPONTANEOUS SYNAPTIC TRANSMISSION	SPONTANEOUS SYNAPTIC TRANSMISSION	11	-0.832391	-1.83638	0.00072615	0.00707712	0.00508888	2049	tags=73%, list=11%, signal=65%	5071/8448/22895/8447/55607/9699/6857/112755
GO EXTRACELLULAR MATRIX CONSTITUENT CONFERRING ELASTICITY	EXTRACELLULAR MATRIX CONSTITUENT CONFERRING ELASTICITY	10	0.864224	1.80371	0.000728437	0.00708322	0.00509328	487	tags=60%, list=3%, signal=59%	90187/3915/11117/10516/84034/2006
GO RESPONSE TO CATECHOLAMINE	RESPONSE TO CATECHOLAMINE	114	-0.442819	-1.60909	0.00072885	0.00708322	0.00509328	3507	tags=26%, list=18%, signal=22%	27065/2776/54331/5594/1815/25/3361/3358/22933/2932/6770/6262/5071/333/3397/5999/5064/6622/57657/3350/3356/1132/50632/8787/111/1128/2775/2774/11255/51617
GO POSTREPLICATION REPAIR	POSTREPLICATION REPAIR	51	0.585734	1.73426	0.000740566	0.00718686	0.0051678	4878	tags=63%, list=25%, signal=47%	9636/9768/5111/6119/5982/51514/7314/5983/10459/5427/84875/5424/672/5984/6118/56852/7319/10714/199990/9246/201973/6117/5425/7316/7311/5985/7334/57804/5429/7320/7353/4436
GO PEPTIDYL TYROSINE MODIFICATION	PEPTIDYL TYROSINE MODIFICATION	364	0.381214	1.42049	0.000742622	0.00719659	0.00517479	2243	tags=24%, list=12%, signal=21%	9021/7422/972/960/857/3678/3976/7132/5154/23529/7465/2202/8826/3383/9833/54209/6352/8651/6464/1489/80310/3689/83666/8764/1969/7060/5606/11314/30844/8460/5175/3059/3606/134/8829/4233/7272/2209/4067/7040/54206/284/8692/958/2242/8444/2050/6503/1636/1956/3280/2260/9961/5788/653361/920/50507/3481/9052/5008/683/5159/3082/3055/4739/64092/2048/1839/5777/2064/1942/2268/3569/4921/54625/54892/916/5912/4282/…
GO REGULATION OF CELL KILLING	REGULATION OF CELL KILLING	92	0.511709	1.68354	0.000743992	0.00719965	0.00517699	3669	tags=35%, list=19%, signal=28%	3383/7305/3075/5819/3077/2597/2217/84868/5551/2213/64581/4843/3134/100507436/3133/3965/5788/4277/2150/5817/8772/10859/6850/563/3575/3684/7409/146850/6372/966/3916/1604
GO BONE MORPHOGENESIS	BONE MORPHOGENESIS	111	0.483771	1.63078	0.000757433	0.00730501	0.00525275	3005	tags=35%, list=16%, signal=30%	4057/302/1292/1277/871/4323/6424/6474/64856/6781/7291/1291/1293/25886/3037/4147/54/7373/1303/7048/4665/2737/2296/9249/7059/7043/10269/22856/338773/642658/4487/2261/116039/85301/6662/5447/1749/3207/389058
GO RESPONSE TO IONIZING RADIATION	RESPONSE TO IONIZING RADIATION	144	0.462042	1.58804	0.000757433	0.00730501	0.00525275	2448	tags=28%, list=13%, signal=24%	301/3627/10135/1647/3383/1958/57817/1535/1026/6591/121457/1894/64782/51776/836/2876/7056/3309/10635/57103/5888/3428/581/3014/4193/8438/79073/5788/641/50507/26272/10413/11200/578/10269/2177/672/7516/7412/3364
GO TYPE I INTERFERON PRODUCTION	TYPE I INTERFERON PRODUCTION	127	0.476244	1.62429	0.000758163	0.00730501	0.00525275	3848	tags=39%, list=20%, signal=31%	9636/4615/929/84282/5441/9111/3148/6737/7097/51191/3659/6772/84868/3665/29108/5971/3428/64135/7128/3661/340061/79132/115004/10211/9641/84166/81844/10475/10859/6850/6778/7098/10293/8780/3663/51311/7318/9208/5437/3586/4790/9246/23586/26191/51284/1499/3654/10623/27297
GO COLLAGEN CATABOLIC PROCESS	COLLAGEN CATABOLIC PROCESS	47	0.617287	1.8117	0.000759156	0.00730501	0.00525275	3604	tags=53%, list=19%, signal=43%	4318/4323/9902/4313/1513/1520/1471/3688/1508/4327/1514/4316/9508/1306/1509/4320/140766/5184/2191/64386/4312/8751/9509/85007/5045
GO POSITIVE REGULATION OF LEUKOCYTE MEDIATED IMMUNITY	POSITIVE REGULATION OF LEUKOCYTE MEDIATED IMMUNITY	129	0.472732	1.61379	0.000767914	0.00737889	0.00530588	2523	tags=29%, list=13%, signal=25%	2207/23529/718/8673/567/7037/3689/54440/5819/3077/3606/2217/91543/7040/958/3554/3134/100507436/3133/5788/4277/2150/10459/7855/388325/2268/3569/5817/3566/8772/5724/7784/6850/695/6778/136/563
GO RESPONSE TO ANTIBIOTIC	RESPONSE TO ANTIBIOTIC	316	0.393794	1.45344	0.000771784	0.00740566	0.00532513	2716	tags=25%, list=14%, signal=22%	301/1277/358/4129/761/3939/3371/6279/3162/7298/8061/6382/3383/929/1958/57817/8836/983/5111/80310/196/2706/1268/3725/3240/79001/1894/1843/6772/6688/5321/3043/3039/1728/836/2876/4233/51150/8754/3309/7200/84557/8692/1191/1536/10287/7128/4193/841/2146/4261/1545/6548/8914/7295/5159/3082/2059/578/8737/1978/3569/2539/3399/5155/2281/3040/6774/51022/2861/80149/7412/51526/6778/374/55364/9076/3779/2934
GO REGULATION OF NIK NF KAPPAB SIGNALING	REGULATION OF NIK NF KAPPAB SIGNALING	104	0.504745	1.69361	0.00078151	0.00748846	0.00538467	3826	tags=36%, list=20%, signal=29%	1116/7114/7205/56892/929/54209/602/7097/9516/3606/84868/811/81/1956/5052/8717/3965/8795/8877/3987/4856/11156/7105/55075/80149/51094/7098/51564/9618/8740/10392/26191/387/51284/3553/3654/3611
GO ENDOCYTIC VESICLE LUMEN	ENDOCYTIC VESICLE LUMEN	20	0.750217	1.84975	0.00079416	0.00759902	0.00546417	2282	tags=45%, list=12%, signal=40%	4057/6288/3240/3043/3039/811/10578/3040/7184
GO SPROUTING ANGIOGENESIS	SPROUTING ANGIOGENESIS	114	0.49899	1.68906	0.000796621	0.00761191	0.00547344	3371	tags=38%, list=18%, signal=31%	301/4223/27286/7422/3678/3162/4804/4017/11082/7057/57381/1948/7101/187/1969/3688/998/8829/284/144455/2050/90993/161742/9723/5315/51176/23670/94/161198/54567/1870/79733/56999/5743/51564/9270/2246/55742/3586/2324/6915/3791/387
GO NEGATIVE REGULATION OF MAST CELL ACTIVATION	NEGATIVE REGULATION OF MAST CELL ACTIVATION	12	0.822038	1.78271	0.000801406	0.00764693	0.00549862	1619	tags=58%, list=8%, signal=53%	3598/3162/1268/11314/3965/146722/284021
GO ORGAN OR TISSUE SPECIFIC IMMUNE RESPONSE	ORGAN OR TISSUE SPECIFIC IMMUNE RESPONSE	39	0.648145	1.84762	0.000807695	0.0076962	0.00553404	2790	tags=23%, list=15%, signal=20%	4057/85236/4843/8970/6037/3569/6170/8349/8347
GO POSITIVE REGULATION OF NF KAPPAB TRANSCRIPTION FACTOR ACTIVITY	POSITIVE REGULATION OF NF KAPPAB TRANSCRIPTION FACTOR ACTIVITY	148	0.459358	1.58557	0.000809878	0.00770625	0.00554127	4235	tags=39%, list=22%, signal=31%	4057/6280/857/6279/114769/3556/3383/4615/3689/7097/10346/3606/85363/29108/958/1191/3304/338382/3656/8717/3965/8877/7314/25865/8737/7188/9830/60401/4919/10211/7185/8915/2319/6774/10475/367/695/7474/7098/6283/9208/4790/10392/10498/3553/7316/121268/3303/10519/948/3654/7311/11035/64320/65992/8837/847/7334
GO CELL JUNCTION ASSEMBLY	CELL JUNCTION ASSEMBLY	243	0.416301	1.5092	0.000821223	0.00780333	0.00561108	2730	tags=28%, list=14%, signal=25%	7422/2318/4323/6281/857/2335/87/3915/3678/7205/977/6385/8826/2316/7057/54751/389/3691/79778/10052/6591/2706/1969/50848/861/81671/1894/829/5175/7408/6615/998/8829/3673/29984/2701/928/90952/81/60/5908/1636/9948/1004/5872/10395/4641/6548/3987/94/1002/6624/1009/1003/7855/1495/3728/71/84962/10211/2042/1307/865/2697/7414/9076/51564/5906/9270
GO SMALL GTPASE BINDING	SMALL GTPASE BINDING	438	-0.325837	-1.35231	0.000829429	0.00787036	0.00565928	3833	tags=32%, list=20%, signal=26%	9882/54662/9181/26985/2665/9909/404636/27352/85377/5903/10260/10059/23603/25924/79735/10160/23299/4905/55667/1855/10640/8408/115557/57139/23365/2664/23329/6654/9727/1122/10938/30000/5866/10527/81846/10133/50855/23085/1730/10125/51479/2245/55770/6293/5905/80243/389337/9826/92558/26088/6792/23268/3996/23263/8416/10152/10411/7249/23274/126003/9515/1793/55160/7074/10811/64901/29/89781/5830/6655/8997/…
GO NEGATIVE REGULATION OF APOPTOTIC SIGNALING PATHWAY	NEGATIVE REGULATION OF APOPTOTIC SIGNALING PATHWAY	225	0.412248	1.48375	0.000833298	0.00789596	0.00567768	4178	tags=40%, list=22%, signal=32%	5054/3958/4318/6648/3315/972/960/3162/64114/2537/5329/7057/3383/2139/10449/355/8531/83596/6591/3148/4000/2876/6615/8829/3065/2070/1191/51060/3304/581/8717/7128/8795/90993/4193/841/4582/2730/2023/51499/10413/8743/220042/3082/27166/8737/624/1495/4282/8772/85450/8996/672/2773/55829/8382/367/3685/255027/5743/7046/7857/219699/51079/6478/4780/57007/54929/54978/3574/4170/7009/120892/5925/3552/3553/5770/…
GO HEPATICOBILIARY SYSTEM DEVELOPMENT	HEPATICOBILIARY SYSTEM DEVELOPMENT	137	0.464137	1.5885	0.000834438	0.00789596	0.00567768	3334	tags=32%, list=17%, signal=27%	301/4192/3162/7298/57817/6790/2487/5111/1051/9104/5764/3725/205/3077/445/6195/4233/3673/144455/1956/3280/7128/2146/1050/5315/10370/3082/2737/4838/10269/3155/5106/5311/79733/9076/5906/6662/1054/3142/2735/3586/5915/6881/55036
GO PROTEIN OXIDATION	PROTEIN OXIDATION	15	0.792446	1.8152	0.000842462	0.00796086	0.00572435	2073	tags=47%, list=11%, signal=42%	4015/4017/4016/2876/84695/84171/285362
GO OXIDOREDUCTASE ACTIVITY ACTING ON PEROXIDE AS ACCEPTOR	OXIDOREDUCTASE ACTIVITY ACTING ON PEROXIDE AS ACCEPTOR	55	0.585224	1.75599	0.000844513	0.00796921	0.00573036	3949	tags=40%, list=21%, signal=32%	241/493869/2882/10549/5742/3043/3039/2876/9588/4258/373156/84817/5052/4257/3040/5743/1193/137902/2950/4259/83667/3046
GO POSITIVE REGULATION OF CELL CYCLE	POSITIVE REGULATION OF CELL CYCLE	372	0.374434	1.39493	0.000851889	0.00802014	0.00576697	3726	tags=29%, list=19%, signal=24%	301/7042/1647/84722/11065/891/51203/8061/1164/1017/6990/9212/1026/9787/6790/983/81610/5111/10403/7101/8318/6737/1263/1163/25886/9510/51512/1894/9493/84967/1490/990/1019/998/2124/811/201161/51514/144455/1869/4085/29127/8444/581/995/1956/3280/2260/4193/113130/4582/2146/199/51499/3481/1111/8877/10370/151195/11200/5159/9700/10926/1978/10615/3276/4282/5155/9928/81620/5311/672/10733/835/79733/51529/281…
GO RESPONSE TO CAMP	RESPONSE TO CAMP	96	0.504863	1.66416	0.000852257	0.00802014	0.00576697	1502	tags=25%, list=8%, signal=23%	1277/358/3488/5322/3939/8061/6382/1261/6781/4435/196/3726/3725/1843/6772/4327/2353/445/7056/7425/3309/366/5908/50507
GO REGULATION OF LEUKOCYTE APOPTOTIC PROCESS	REGULATION OF LEUKOCYTE APOPTOTIC PROCESS	84	0.528779	1.7098	0.000856767	0.00805149	0.00578952	3896	tags=42%, list=20%, signal=33%	301/3958/972/2207/9212/6352/3059/3665/4067/581/3965/1234/29126/27166/8660/1942/4282/8915/8772/3718/10859/55829/695/171558/7474/3575/1029/3586/3620/5293/7157/384/2621/3579/11035
GO NEUROTRANSMITTER BINDING	NEUROTRANSMITTER BINDING	56	-0.558547	-1.82351	0.000858799	0.0080595	0.00579528	4187	tags=41%, list=22%, signal=32%	3354/1119/6540/6539/1135/875/2731/3361/3358/1393/590/2904/27232/2743/3350/1394/3356/8001/1141/1137/116443/6529/2902
GO INTERLEUKIN 10 PRODUCTION	INTERLEUKIN 10 PRODUCTION	55	0.584731	1.75451	0.000861235	0.00806351	0.00579816	3235	tags=44%, list=17%, signal=36%	2207/9636/7305/54209/602/80380/7097/54440/29108/2213/64581/3965/29126/28951/3082/2150/3718/10859/947/6850/353514/9308/5580/3620
GO LEUKOCYTE MIGRATION INVOLVED IN INFLAMMATORY RESPONSE	LEUKOCYTE MIGRATION INVOLVED IN INFLAMMATORY RESPONSE	14	0.803535	1.80302	0.000862373	0.00806351	0.00579816	731	tags=43%, list=4%, signal=41%	6280/4192/6279/3689/56833/5764
GO ACID SECRETION	ACID SECRETION	124	-0.440745	-1.61851	0.000862767	0.00806351	0.00579816	1250	tags=23%, list=7%, signal=22%	320/22999/6622/4828/4763/7349/8499/10809/8541/8398/6844/885/6511/5027/18/5864/6857/6812/6506/6529/6860/57030/6505/9026/9256/11255/6616/4915/10815
GO MEMBRANE REGION	MEMBRANE REGION	330	0.387297	1.43414	0.000864556	0.00806919	0.00580225	3088	tags=33%, list=16%, signal=28%	10630/302/871/6281/857/284119/3162/7132/5359/684/23237/30846/6385/8826/3383/929/858/26509/355/3689/112464/1268/7097/83483/3688/5230/5175/23180/10008/91663/836/962/4067/7035/3037/1803/284/7846/1947/8692/7462/914/10287/23433/10542/2817/1956/10376/2013/8717/81930/3937/7096/28956/841/4973/3672/6608/2149/161742/1509/10395/5788/920/79054/4641/729085/6548/130574/84876/7048/330/476/3055/55243/8737/7133/1…
GO CHEMOATTRACTANT ACTIVITY	CHEMOATTRACTANT ACTIVITY	39	0.646796	1.84378	0.000867524	0.00808584	0.00581422	2750	tags=33%, list=14%, signal=29%	3958/6288/3627/10457/7422/6352/3148/6289/3082/4282/5155/7474/7857
GO CELLULAR RESPONSE TO ABIOTIC STIMULUS	CELLULAR RESPONSE TO ABIOTIC STIMULUS	328	0.394378	1.46048	0.000868839	0.00808707	0.0058151	3539	tags=33%, list=18%, signal=28%	1277/358/10135/1647/7132/362/4239/55872/114769/4615/1958/57817/9212/706/1535/834/1026/355/5111/8531/2022/6591/50848/3659/5764/1894/51776/836/4055/3673/5269/3309/10635/54206/8692/958/5971/4316/1265/5888/3428/581/1956/3014/8795/4193/841/79073/641/50507/51499/26272/1643/400410/6548/84329/10413/1111/11200/476/578/624/5158/6494/5978/5734/122622/10269/5424/8915/150678/8772/5311/835/5724/3364/4638/64265…
GO T TUBULE	T TUBULE	52	-0.55436	-1.78485	0.000871336	0.00809928	0.00582388	2762	tags=48%, list=14%, signal=41%	9722/6517/776/287/775/783/148/7430/6253/274/288/59284/59283/6261/477/6326/79026/3760/5532/844/781/6323/27092/9472/3767
GO CALCIUM CHANNEL COMPLEX	CALCIUM CHANNEL COMPLEX	66	-0.524139	-1.75856	0.000890244	0.00826379	0.00594217	2806	tags=39%, list=15%, signal=34%	808/9722/91404/776/775/3306/6262/783/782/785/8911/8912/59284/59283/55799/10367/774/777/6261/9254/781/10368/773/27092/9472/10369
GO DENDRITE CYTOPLASM	DENDRITE CYTOPLASM	32	-0.638625	-1.82468	0.000906997	0.00840787	0.00604578	1406	tags=47%, list=7%, signal=44%	6416/5594/2899/6792/3208/3799/7881/23710/1742/5813/3800/4133/2898/3798/9026
GO CELL JUNCTION ORGANIZATION	CELL JUNCTION ORGANIZATION	292	0.398978	1.46412	0.00091928	0.00851019	0.00611936	2730	tags=28%, list=14%, signal=24%	7422/2318/4323/7042/6281/857/2335/87/3915/3678/7205/977/6385/8826/2316/7057/54751/283/389/3691/79778/10052/6591/2706/1969/50848/861/81671/1894/829/5175/5819/7408/6615/998/8829/3673/29984/7040/2701/928/90952/81/60/5908/1636/9948/1004/5872/2149/10395/4641/1829/6548/9253/3987/94/1002/6624/1009/1003/2150/7855/7043/1495/3728/71/84962/5817/10211/2042/1307/11228/865/2697/7414/7046/9076/51564/5906/9270
GO T CELL ACTIVATION VIA T CELL RECEPTOR CONTACT WITH ANTIGEN BOUND TO MHC MOLECULE ON ANTIGEN PRESENTING CELL	T CELL ACTIVATION VIA T CELL RECEPTOR CONTACT WITH ANTIGEN BOUND TO MHC MOLECULE ON ANTIGEN PRESENTING CELL	10	0.85883	1.79245	0.000924252	0.00854464	0.00614412	2306	tags=90%, list=12%, signal=79%	3958/3109/3383/10875/84868/3965/54518/3683/10859
GO CD4 POSITIVE ALPHA BETA T CELL DIFFERENTIATION	CD4 POSITIVE ALPHA BETA T CELL DIFFERENTIATION	73	0.539896	1.70712	0.000936963	0.00865045	0.00622021	3044	tags=38%, list=16%, signal=32%	301/602/8651/54440/861/3606/1880/84695/91543/5971/64332/3965/942/51176/10538/864/5734/3569/51043/3566/6774/3718/80149/865/6778/3071/3142/9308
GO CELL AGING	CELL AGING	105	0.497842	1.66995	0.000946121	0.00871231	0.00626469	3183	tags=35%, list=17%, signal=30%	5054/10135/3383/10783/2305/567/1026/983/7291/83596/2022/4000/811/140823/84417/3014/6909/406/1021/50507/3159/55170/1111/11200/3987/115004/10269/4282/51384/26271/286053/5933/2067/23636/1029/5580/5074
GO NEGATIVE REGULATION OF NATURAL KILLER CELL ACTIVATION	NEGATIVE REGULATION OF NATURAL KILLER CELL ACTIVATION	11	0.840705	1.80484	0.000946214	0.00871231	0.00626469	1932	tags=36%, list=10%, signal=33%	84868/3134/100507436/2268
GO POSITIVE REGULATION OF LYMPHOCYTE DIFFERENTIATION	POSITIVE REGULATION OF LYMPHOCYTE DIFFERENTIATION	94	0.504354	1.6599	0.000955189	0.00878311	0.0063156	3425	tags=37%, list=18%, signal=31%	301/4323/972/4192/8651/11221/54440/861/3606/64332/3965/10385/942/5788/4860/3559/7048/2737/864/11006/51043/3566/10288/865/6850/695/3071/3575/3635/3142/9308/3574/146850/387/2736
GO ANTIBACTERIAL HUMORAL RESPONSE	ANTIBACTERIAL HUMORAL RESPONSE	42	0.621206	1.78505	0.000956968	0.00878764	0.00631886	2790	tags=29%, list=15%, signal=24%	4057/85236/10417/6039/6590/8970/3133/3512/6037/6170/8349/8347
GO REGULATION OF SODIUM ION TRANSPORT	REGULATION OF SODIUM ION TRANSPORT	84	-0.486649	-1.7011	0.000963243	0.00882914	0.0063487	2255	tags=44%, list=12%, signal=39%	481/11261/7402/9368/6324/154/6546/23171/1815/65267/6330/54800/10768/486/286183/5270/65125/57520/3799/57731/288/23072/53822/477/4302/81832/5027/5581/154215/65268/6327/79570/53826/2257/1272/55800/128414
GO UROGENITAL SYSTEM DEVELOPMENT	UROGENITAL SYSTEM DEVELOPMENT	330	0.3862	1.43008	0.000964072	0.00882914	0.0063487	3033	tags=29%, list=16%, signal=25%	301/1282/4318/7422/7042/10252/3371/255743/3976/5154/285/2302/157506/760/6385/8826/6382/59/3675/3217/1958/5176/25937/4435/3691/1634/1948/3239/182/80310/25959/9104/55165/3913/9510/3237/5175/6772/1063/445/8829/2028/4811/3037/284/8692/2828/8842/581/1636/3280/2260/2297/6608/29927/10272/26508/10413/79084/5159/2737/51668/2048/2296/3227/10269/3399/5155/4643/10972/8772/5311/4953/4854/8642/947/25976/10481/…
GO DENDRITIC CELL MIGRATION	DENDRITIC CELL MIGRATION	28	0.683864	1.81285	0.000966809	0.00884236	0.0063582	3940	tags=61%, list=21%, signal=48%	7852/6352/56833/1880/998/811/196527/1230/3965/1234/2059/54795/708/2621/5294/3579/729230
GO MEIOTIC CELL CYCLE	MEIOTIC CELL CYCLE	242	0.412946	1.49355	0.000981069	0.00896078	0.00644335	3494	tags=26%, list=18%, signal=21%	991/9232/3976/7153/1164/1017/6790/2827/4751/699/10051/83540/5347/1843/23397/701/9319/7272/811/84057/5932/9156/5888/995/81930/3014/8438/259266/55706/10609/151648/151246/7314/9700/7283/10096/4627/2177/84944/378708/7516/3364/4487/26271/7474/146956/51441/143689/993/3955/2067/898/83990/994/2175/55329/201254/9918/100130958/25788/6117/29893
GO NEGATIVE REGULATION OF RESPONSE TO WOUNDING	NEGATIVE REGULATION OF RESPONSE TO WOUNDING	87	0.511475	1.66148	0.000984806	0.00898291	0.00645927	2070	tags=28%, list=11%, signal=25%	5054/302/710/6696/5327/5328/4192/308/5154/5329/7057/5627/1026/11221/114897/7056/135228/7035/928/29956/89790/84959/5155/10019
GO HIGH VOLTAGE GATED CALCIUM CHANNEL ACTIVITY	HIGH VOLTAGE GATED CALCIUM CHANNEL ACTIVITY	10	-0.844511	-1.84477	0.000992216	0.00903843	0.00649919	2543	tags=70%, list=13%, signal=61%	776/775/783/782/785/774/773
GO RESPIRATORY CHAIN COMPLEX	RESPIRATORY CHAIN COMPLEX	73	0.538223	1.70183	0.000996927	0.00906925	0.00652135	5775	tags=63%, list=30%, signal=44%	56901/84419/440567/4696/4725/27089/1340/1349/4697/7386/55101/4713/6392/7388/6390/51079/4695/1337/4707/4708/29796/9377/84701/4717/4711/1351/4700/55967/4710/4709/4728/4694/4706/135154/4701/4712/4726/790955/4729/90871/7384/4702/1537/4731/54539/126328
GO ATTACHMENT OF SPINDLE MICROTUBULES TO KINETOCHORE	ATTACHMENT OF SPINDLE MICROTUBULES TO KINETOCHORE	33	0.655826	1.80054	0.00101165	0.00919092	0.00660884	3842	tags=58%, list=20%, signal=46%	891/11004/9212/10403/4751/83540/1894/998/29127/151648/1062/10615/81620/91272/57082/90417/5925/55920/6795
GO COFACTOR CATABOLIC PROCESS	COFACTOR CATABOLIC PROCESS	65	0.544892	1.69091	0.00101725	0.00922956	0.00663663	2921	tags=31%, list=15%, signal=26%	3162/4504/10549/3240/3043/3039/2876/9588/874/2687/645/5052/10840/3040/79094/10588/191/57834/215/137902
GO TYPE 2 IMMUNE RESPONSE	TYPE 2 IMMUNE RESPONSE	38	0.63226	1.79471	0.00103297	0.00935976	0.00673025	4403	tags=53%, list=23%, signal=41%	301/972/602/3606/91543/1893/942/10538/3569/3566/6778/3142/3586/3620/255877/9466/384/729230/2625/7292
GO CHEMOKINE RECEPTOR BINDING	CHEMOKINE RECEPTOR BINDING	64	0.558718	1.72614	0.00103566	0.00937168	0.00673882	3974	tags=33%, list=21%, signal=26%	3627/3576/9547/6347/6352/6373/6772/4283/51192/29097/58191/6364/2919/6774/6362/9034/5473/6372/6354/729230/6355
GO OPSONIN BINDING	OPSONIN BINDING	15	0.787817	1.8046	0.00103876	0.00938729	0.00675005	3694	tags=73%, list=19%, signal=59%	5806/22918/11326/3689/811/5245/3685/3684/84466/720/708
GO POSITIVE REGULATION OF BLOOD VESSEL ENDOTHELIAL CELL MIGRATION	POSITIVE REGULATION OF BLOOD VESSEL ENDOTHELIAL CELL MIGRATION	54	0.582763	1.74074	0.00104336	0.00941643	0.00677099	1672	tags=30%, list=9%, signal=27%	301/27286/7422/3315/7114/3162/7057/57381/5606/8829/7040/284/958/2260/6776/25865
GO DRUG CATABOLIC PROCESS	DRUG CATABOLIC PROCESS	138	0.460641	1.57862	0.00106318	0.00958263	0.00689051	3072	tags=22%, list=16%, signal=18%	26002/4129/1806/51268/4504/1889/10549/3240/51816/3043/3039/2876/9588/3242/259307/1486/5052/2184/5092/10007/5973/3040/5106/23475/221/29785/10588/137902/5447/80896
GO REGULATION OF AMPA RECEPTOR ACTIVITY	REGULATION OF AMPA RECEPTOR ACTIVITY	25	-0.690868	-1.84004	0.0010715	0.00963321	0.00692688	2417	tags=68%, list=13%, signal=59%	729993/50488/5649/54413/22871/388336/59284/85358/59283/10368/57555/50944/22941/27092/23542/10369/729956
GO POTASSIUM ION IMPORT ACROSS PLASMA MEMBRANE	POTASSIUM ION IMPORT ACROSS PLASMA MEMBRANE	48	-0.557759	-1.77363	0.00107161	0.00963321	0.00692688	3256	tags=35%, list=17%, signal=29%	3773/65267/3768/6560/486/65125/9990/477/3761/3760/610/57468/65268/3766/3767/3765/478
GO CELLULAR RESPONSE TO EXTERNAL STIMULUS	CELLULAR RESPONSE TO EXTERNAL STIMULUS	330	0.384292	1.42301	0.00108847	0.00976726	0.00702327	3955	tags=36%, list=21%, signal=29%	10631/1277/358/10135/1647/3371/3162/7132/7378/467/8061/440738/3383/4615/1535/79792/834/1026/355/2022/6591/25959/50848/3659/5764/3725/81788/3077/1611/2353/4055/3673/5028/55062/4067/3309/84557/958/1536/2242/4316/1265/5292/7071/3428/2348/1956/8795/4193/6263/841/199/5788/6548/1111/26608/51100/476/578/1594/6494/3676/5734/79077/5251/8915/8772/51022/54795/835/7184/6502/5899/64121/10518/80149/9463/7412/1…
GO CARTILAGE DEVELOPMENT INVOLVED IN ENDOCHONDRAL BONE MORPHOGENESIS	CARTILAGE DEVELOPMENT INVOLVED IN ENDOCHONDRAL BONE MORPHOGENESIS	46	0.609794	1.78176	0.00108938	0.00976726	0.00702327	3638	tags=50%, list=19%, signal=41%	302/1292/1277/871/6474/64856/6781/1291/1293/25886/4147/7373/1303/7048/7059/10269/85301/6662/5447/3207/5915/10498/4148
GO POSITIVE REGULATION OF TOLL LIKE RECEPTOR SIGNALING PATHWAY	POSITIVE REGULATION OF TOLL LIKE RECEPTOR SIGNALING PATHWAY	23	0.715036	1.84896	0.00109257	0.00978301	0.00703459	2684	tags=39%, list=14%, signal=34%	4057/857/1535/7097/91543/7096/2150/10211/7098
GO PHOTORECEPTOR CELL MAINTENANCE	PHOTORECEPTOR CELL MAINTENANCE	38	-0.602535	-1.78988	0.00109478	0.00978997	0.00703959	215	tags=13%, list=1%, signal=13%	84059/7275/65217/92211/10083
GO NEGATIVE REGULATION OF FIBRINOLYSIS	NEGATIVE REGULATION OF FIBRINOLYSIS	10	0.855715	1.78595	0.00110419	0.00983891	0.00707478	960	tags=30%, list=5%, signal=29%	5054/7057/7056
GO ODONTOGENESIS	ODONTOGENESIS	133	0.468033	1.60076	0.00110505	0.00983891	0.00707478	2158	tags=25%, list=11%, signal=22%	5054/1277/1278/358/133/7042/3371/3912/56975/4982/362/760/6382/3691/29887/7291/10312/54757/3065/54829/581/6608/51176/5066/2737/2296/7043/1495/3399/5251/1441/9464/7286
GO NEUROTRANSMITTER UPTAKE	NEUROTRANSMITTER UPTAKE	46	-0.567202	-1.76842	0.00110516	0.00983891	0.00707478	3185	tags=41%, list=17%, signal=35%	6512/1815/8864/3177/2055/5071/2668/2824/5999/6622/9143/477/6511/3766/6506/81539/6529/6505/6616
GO POSITIVE REGULATION OF CHEMOKINE PRODUCTION	POSITIVE REGULATION OF CHEMOKINE PRODUCTION	56	0.567173	1.7092	0.00110601	0.00983891	0.00707478	2684	tags=34%, list=14%, signal=29%	10631/972/3162/1958/7291/7097/84868/29108/64581/3965/199/3569/4282/3566/6850/247/136/7474/7098
GO POSITIVE REGULATION OF OSTEOCLAST DIFFERENTIATION	POSITIVE REGULATION OF OSTEOCLAST DIFFERENTIATION	27	0.693455	1.84181	0.00111749	0.00992812	0.00713893	2285	tags=26%, list=12%, signal=23%	760/7305/54209/2353/7071/1230/169200
GO GLUCOSE BINDING	GLUCOSE BINDING	11	0.837793	1.79859	0.00112114	0.00993477	0.00714372	2014	tags=73%, list=11%, signal=65%	5836/3099/6515/3101/2997/2645/2539/7360
GO HORMONE TRANSPORT	HORMONE TRANSPORT	315	-0.344435	-1.38868	0.00112115	0.00993477	0.00714372	2608	tags=24%, list=14%, signal=21%	10765/6720/8938/776/9854/3358/775/1393/5950/6755/4760/9572/6343/10411/5071/9515/7432/7074/5781/8997/6934/1908/2740/91608/6804/6453/94121/5530/3799/9066/5799/22841/143425/114/3350/1428/3156/4828/55638/1394/777/7349/8447/8398/93/3747/9254/5578/5532/5798/4644/408/1363/18/5581/57555/773/55636/818/9699/7447/9024/111/6659/55512/4878/2746/952/6616/2850/11069/10815/6833/375704/3745/3767
GO NEGATIVE REGULATION OF NEURON PROJECTION DEVELOPMENT	NEGATIVE REGULATION OF NEURON PROJECTION DEVELOPMENT	149	-0.412819	-1.54849	0.0011241	0.00994795	0.00715319	2307	tags=34%, list=12%, signal=30%	7025/2932/23108/1809/1630/54413/23105/1949/7473/5048/22871/23189/146760/22891/22876/10507/3397/25791/5530/10500/10509/8831/7248/2258/5802/9693/1400/23258/349667/56920/348/4168/57715/64218/22902/223117/6695/65078/4099/4038/11075/4133/952/4974/84894/10501/26052/112755/8851/7143
GO EXOCYTIC PROCESS	EXOCYTIC PROCESS	82	-0.48558	-1.69399	0.00112641	0.00995551	0.00715863	2393	tags=34%, list=13%, signal=30%	23233/2039/9751/1488/22871/8867/440279/6804/6843/26059/9066/143425/6622/5413/8541/112476/63908/5864/6857/6812/115827/4878/6616/112755/23025/10815/3745/10814
GO INTERACTION WITH SYMBIONT	INTERACTION WITH SYMBIONT	76	0.526961	1.66592	0.00116215	0.0102581	0.00737624	1871	tags=21%, list=10%, signal=19%	4057/302/358/5806/2335/858/6352/3725/2597/2876/3065/5479/51176/3429/2150/5978
GO NEGATIVE REGULATION OF INTRACELLULAR SIGNAL TRANSDUCTION	NEGATIVE REGULATION OF INTRACELLULAR SIGNAL TRANSDUCTION	492	0.357868	1.35912	0.00117012	0.0103152	0.00741725	3231	tags=26%, list=17%, signal=23%	4318/81848/6648/2633/3315/972/960/7042/10252/857/7114/3976/11117/5329/55872/467/1848/7057/2192/10253/3675/1847/2305/1827/55584/7291/8531/83596/2203/6591/84270/112464/23612/187/1969/3688/9516/11221/200734/11314/1843/6772/91663/2876/399473/1649/6615/1846/4233/4067/3065/29108/54206/8692/1191/5341/51060/5998/8444/1902/57761/7128/10385/90993/4193/406/841/4582/161742/2023/10395/5788/51499/57561/220042/…
GO REGULATION OF BLOOD CIRCULATION	REGULATION OF BLOOD CIRCULATION	285	-0.360646	-1.44014	0.00119646	0.0105338	0.00757446	2574	tags=25%, list=13%, signal=22%	6720/776/287/147/775/40/10768/486/6262/783/148/782/7068/7220/785/659/4634/1908/2740/10142/274/8912/57731/5999/2258/59284/3775/59283/23493/55799/80763/53822/774/6261/7349/477/10659/3761/3760/492/9254/3356/844/4092/781/30845/10368/29119/491/3781/6327/6547/7067/27092/9759/2775/3751/6505/3777/4878/53826/952/4625/6543/10369/55800/3767/478/30818/30819/1113
GO SPONGIOTROPHOBLAST LAYER DEVELOPMENT	SPONGIOTROPHOBLAST LAYER DEVELOPMENT	14	0.793573	1.78067	0.00120421	0.0105883	0.00761367	511	tags=36%, list=3%, signal=35%	9021/133/3976/4435/7262
GO POSTSYNAPSE ASSEMBLY	POSTSYNAPSE ASSEMBLY	31	-0.645056	-1.82068	0.00121587	0.0106771	0.00767751	1980	tags=55%, list=10%, signal=49%	54413/4916/22871/5802/85358/347730/26045/57555/50944/5789/2895/4038/22941/9379/84628/9378/869
GO ANCHORED COMPONENT OF MEMBRANE	ANCHORED COMPONENT OF MEMBRANE	165	-0.407955	-1.5452	0.00121788	0.0106811	0.00768038	2337	tags=25%, list=12%, signal=22%	56341/4326/27255/5869/80331/221914/2350/1944/146760/6900/2572/66004/249/349667/762/1012/401190/5874/4045/503542/1271/161357/84966/285704/50863/65078/338328/257194/5864/4684/4978/4062/115827/100133941/5067/4974/84628/6853/1272/63827/2674
GO SYNAPTIC VESICLE CLUSTERING	SYNAPTIC VESICLE CLUSTERING	16	-0.754807	-1.8381	0.00122276	0.0107003	0.00769421	2899	tags=75%, list=15%, signal=64%	27445/5728/84446/27253/54413/22871/8224/57555/6854/5864/9024/6853
GO POSITIVE REGULATION OF CELL CYCLE PHASE TRANSITION	POSITIVE REGULATION OF CELL CYCLE PHASE TRANSITION	92	0.499939	1.64481	0.0012258	0.0107003	0.00769421	3625	tags=35%, list=19%, signal=28%	301/11065/891/9787/983/81610/8318/9510/84967/990/1019/51514/8444/995/1956/4193/113130/2146/199/9700/81620/51529/26271/993/286053/898/994/2735/29766/8317/5925/55920
GO DNA REPLICATION ORIGIN BINDING	DNA REPLICATION ORIGIN BINDING	24	0.707429	1.86378	0.0012269	0.0107003	0.00769421	3028	tags=54%, list=16%, signal=46%	4171/8318/990/4998/4175/4174/4172/4173/83743/23594/5001/84515/55388
GO INNATE IMMUNE RESPONSE IN MUCOSA	INNATE IMMUNE RESPONSE IN MUCOSA	24	0.707671	1.86442	0.0012269	0.0107003	0.00769421	2790	tags=33%, list=15%, signal=29%	4057/85236/4843/8970/6037/6170/8349/8347
GO DEVELOPMENTAL MATURATION	DEVELOPMENTAL MATURATION	280	-0.350135	-1.40051	0.00122791	0.0107003	0.00769421	2311	tags=22%, list=12%, signal=19%	22933/5649/5745/7480/10220/4761/64131/9331/153090/440279/6900/5364/6376/144347/3516/10507/57731/1901/5064/5881/9148/55638/1742/6261/4763/429/51286/84530/9985/5798/4644/22859/5979/1910/84966/4747/50944/27289/5864/6812/124925/8941/577/6855/6860/10882/57030/59277/388585/26047/9378/8851/23025/63827/51412/2902/23544/30819/650/55612/30812
GO APICAL PART OF CELL	APICAL PART OF CELL	394	0.371688	1.39287	0.00123285	0.0107297	0.00771535	2707	tags=21%, list=14%, signal=18%	3485/10630/301/5327/358/4478/960/2335/9180/684/362/760/23704/57817/6781/728/1535/1800/182/29887/286204/11178/8323/25932/55686/10312/5021/3077/57619/103910/4430/998/2028/5028/1803/8692/928/1836/2151/5002/2348/84417/51364/8842/1956/5873/2013/4582/259266/2030/50507/6522/1829/6548/6566/476/5159/6809/9341/4257/6338/7283/2064/4921/5664/64924/10752/8642/947/134549/374969/128338/121441/5031/7412/6518/542…
GO RESPONSE TO POTASSIUM ION	RESPONSE TO POTASSIUM ION	15	-0.778805	-1.8751	0.00123953	0.0107741	0.00774724	3076	tags=47%, list=16%, signal=39%	79800/1393/8912/11093/1742/3746/1740
GO NEUROPEPTIDE SIGNALING PATHWAY	NEUROPEPTIDE SIGNALING PATHWAY	100	-0.454728	-1.62974	0.00124926	0.0108447	0.00779799	3643	tags=27%, list=19%, signal=22%	9607/6863/56923/9427/10888/57537/4987/6753/84539/114815/11251/11248/6755/27344/2743/9693/4828/4852/7349/8001/1363/22986/4878/23620/6751/2834/6752
GO ENDOCHONDRAL BONE MORPHOGENESIS	ENDOCHONDRAL BONE MORPHOGENESIS	71	0.532345	1.68228	0.00125082	0.0108447	0.00779799	2972	tags=38%, list=16%, signal=32%	302/1292/1277/871/4323/6474/64856/6781/1291/1293/25886/4147/7373/1303/7048/4665/2296/7059/10269/338773/642658/2261/85301/6662/5447/1749/3207
GO NEUROTRANSMITTER RECEPTOR LOCALIZATION TO POSTSYNAPTIC SPECIALIZATION MEMBRANE	NEUROTRANSMITTER RECEPTOR LOCALIZATION TO POSTSYNAPTIC SPECIALIZATION MEMBRANE	21	-0.713253	-1.83289	0.00126195	0.0109134	0.00784744	1620	tags=57%, list=8%, signal=52%	23096/10243/388336/59284/59283/1742/10368/5590/1740/27092/53616/10369
GO POSTSYNAPTIC SPECIALIZATION ASSEMBLY	POSTSYNAPTIC SPECIALIZATION ASSEMBLY	21	-0.712803	-1.83174	0.00126195	0.0109134	0.00784744	1818	tags=71%, list=9%, signal=65%	4916/22871/5802/85358/347730/26045/57555/50944/5789/2895/22941/9379/84628/9378/869
GO ORGANELLAR RIBOSOME	ORGANELLAR RIBOSOME	87	0.505274	1.64134	0.00126617	0.0109362	0.00786378	5781	tags=55%, list=30%, signal=39%	64960/6183/64979/51373/64981/115416/51253/64983/55168/28998/29088/57129/55052/64968/63875/84769/29093/54148/3396/128308/64951/7818/9553/55173/65003/6150/51069/92259/740/64928/51081/4706/387338/51073/4701/64976/65005/64975/116541/51023/51258/219927/6182/51264/122704/60488/51650/116540
GO TRANSPORT VESICLE	TRANSPORT VESICLE	397	-0.332651	-1.35626	0.00126959	0.0109518	0.00787501	1887	tags=21%, list=10%, signal=19%	57120/85439/1759/8448/55754/440279/134957/6804/23312/9632/94121/321/55704/4884/274/140679/2572/22895/6861/84258/6843/9066/6653/10966/5799/23176/246213/273/5802/143425/320/6622/5413/8224/9143/5414/80763/1742/9627/132204/762/6844/148281/9162/9899/5874/5798/6721/1363/112476/25956/9145/388662/4900/57586/6854/5864/7732/203190/192683/6857/8927/5126/2890/115827/6855/6860/57030/83992/57221/547/6853/6616/…
GO RESPONSE TO GAMMA RADIATION	RESPONSE TO GAMMA RADIATION	56	0.564852	1.70221	0.00128896	0.0110987	0.00798067	2424	tags=38%, list=13%, signal=33%	3627/1958/1535/1026/51776/2876/3309/57103/5888/581/3014/4193/79073/5788/50507/10413/11200/578/10269/2177/7516
GO CYTIDINE TO URIDINE EDITING	CYTIDINE TO URIDINE EDITING	12	0.810424	1.75752	0.00128987	0.0110987	0.00798067	2422	tags=50%, list=13%, signal=44%	27350/60489/9582/200316/54502/140564
GO MORPHOGENESIS OF A BRANCHING STRUCTURE	MORPHOGENESIS OF A BRANCHING STRUCTURE	199	0.419491	1.49291	0.00129283	0.0110998	0.00798144	2670	tags=27%, list=14%, signal=24%	1282/9021/133/7422/4323/10252/4192/3371/3202/255743/5154/6474/157506/10253/3217/4435/3239/1522/2022/6591/25932/1969/3237/6768/8829/4233/23129/2260/2297/2119/6608/9723/10371/10413/51176/9620/7048/8914/3082/2737/5499/7855/54567/5311/1307/8642/10481/367/374/4776/2719/7474/7052/6692
GO TUMOR NECROSIS FACTOR BIOSYNTHETIC PROCESS	TUMOR NECROSIS FACTOR BIOSYNTHETIC PROCESS	30	0.678531	1.82416	0.00129324	0.0110998	0.00798144	3940	tags=50%, list=21%, signal=40%	3315/7057/7305/602/9590/54206/1536/64581/7096/10859/6850/9261/3586/6693/729230
GO REGULATION OF DEFENSE RESPONSE TO VIRUS	REGULATION OF DEFENSE RESPONSE TO VIRUS	73	0.529694	1.67486	0.00129675	0.0111159	0.00799304	3875	tags=41%, list=20%, signal=33%	83666/10875/60489/51191/6772/151636/29108/200316/7128/3559/330/4277/340061/79594/79132/115004/10269/7105/10475/10859/80149/117854/8780/255520/55601/6895/23586/3553/708/163702
GO CELL ADHESION MEDIATED BY INTEGRIN	CELL ADHESION MEDIATED BY INTEGRIN	69	0.536642	1.69167	0.00130254	0.0111515	0.00801865	2730	tags=49%, list=14%, signal=42%	5054/5328/7042/255743/3678/3383/3691/6352/6591/23075/3689/1969/3688/3673/83706/8754/4067/1803/3696/4582/1545/3693/5777/1942/3676/916/4856/3690/1307/6850/3685/5420/3071/9270
GO CELLULAR MODIFIED AMINO ACID METABOLIC PROCESS	CELLULAR MODIFIED AMINO ACID METABOLIC PROCESS	187	0.438362	1.55207	0.00130887	0.0111917	0.00804755	4022	tags=33%, list=21%, signal=26%	5320/5322/5359/7298/51268/10404/5352/1800/10549/8836/5351/347735/8985/5321/2628/2876/445/54677/4258/373156/23474/26873/2687/2348/2730/8875/4257/154141/2643/2539/6470/114884/10840/51022/79094/3417/10588/191/8884/9536/51248/1757/9791/2944/5447/2937/6583/79017/4780/34/2936/11145/117247/2950/1719/1160/376497/2948/33/2949/30001
GO INORGANIC ANION TRANSMEMBRANE TRANSPORTER ACTIVITY	INORGANIC ANION TRANSMEMBRANE TRANSPORTER ACTIVITY	139	-0.413867	-1.5543	0.00131252	0.0111966	0.00805103	2769	tags=24%, list=14%, signal=21%	1183/1182/11095/6560/2557/57348/121601/203859/10861/1185/23507/2560/9990/57719/2743/57282/8671/2558/2561/94015/8001/56262/2554/57468/144453/6509/9356/57030/6505/2566/2565/2563/2556/2562
GO REGULATION OF ACTIN FILAMENT BASED PROCESS	REGULATION OF ACTIN FILAMENT BASED PROCESS	374	0.370759	1.38136	0.00131271	0.0111966	0.00805103	2801	tags=28%, list=15%, signal=24%	10630/822/6281/4192/857/7114/9168/5154/684/6385/2316/3383/57381/10788/389/6781/58527/5880/2006/93663/397/23075/10095/50848/9535/8477/1894/829/3059/23406/1490/10008/7408/91663/134/998/5216/8829/4233/29984/10092/29108/90952/5341/390/2242/11346/1265/23433/11344/1902/89848/9948/817/29109/10395/9723/50507/4641/85477/1829/6548/830/148170/683/9620/5066/476/5159/3055/2059/55243/285590/6624/10096/2150/573…
GO NEUROTRANSMITTER SODIUM SYMPORTER ACTIVITY	NEUROTRANSMITTER SODIUM SYMPORTER ACTIVITY	26	-0.672035	-1.80201	0.00132483	0.0112858	0.00811519	2247	tags=27%, list=12%, signal=24%	55117/6534/6511/388662/6506/6529/6505
GO RETINA MORPHOGENESIS IN CAMERA TYPE EYE	RETINA MORPHOGENESIS IN CAMERA TYPE EYE	55	-0.548072	-1.79029	0.0013277	0.0112879	0.00811668	3365	tags=36%, list=18%, signal=30%	7070/50937/10210/5629/793/25945/5950/4040/7068/5797/348980/51761/22882/28996/1826/84465/4915/28514/10083/30812
GO GROWTH PLATE CARTILAGE DEVELOPMENT	GROWTH PLATE CARTILAGE DEVELOPMENT	35	0.632232	1.75125	0.00132837	0.0112879	0.00811668	3638	tags=51%, list=19%, signal=42%	302/1292/64856/6781/1291/1293/25886/4147/7373/1303/7048/7059/10269/85301/5447/5915/10498/4148
GO SEQUESTERING OF METAL ION	SEQUESTERING OF METAL ION	15	0.782183	1.79169	0.0013332	0.0113061	0.00812978	1794	tags=33%, list=9%, signal=30%	6280/6279/2512/148867/2495
GO CORNIFIED ENVELOPE	CORNIFIED ENVELOPE	44	0.606164	1.75534	0.00133452	0.0113061	0.00812978	1959	tags=14%, list=10%, signal=12%	301/5266/1475/3858/1829/3728
GO RESPONSE TO ZINC ION	RESPONSE TO ZINC ION	52	0.586358	1.74544	0.00133548	0.0113061	0.00812978	2445	tags=33%, list=13%, signal=29%	6279/4499/760/4493/4504/57817/706/8836/4502/4489/445/84329/4496/4495/64924/7412/4494
GO PEPTIDASE COMPLEX	PEPTIDASE COMPLEX	88	0.513395	1.67493	0.00134669	0.0113848	0.00818639	4295	tags=43%, list=22%, signal=34%	3315/2152/5696/5698/5714/5701/5688/5721/6883/5704/5686/5692/5711/5691/90637/60559/5682/5683/5690/5689/5720/90701/5700/10213/5699/9690/28972/11047/5718/5684/23478/9789/56943/5719/5685/6880/5715/5708
GO REGULATION OF CHOLESTEROL METABOLIC PROCESS	REGULATION OF CHOLESTEROL METABOLIC PROCESS	56	-0.548085	-1.78936	0.00134811	0.0113848	0.00818639	3178	tags=39%, list=17%, signal=33%	4800/4598/10654/6309/6720/4801/57678/1609/2222/4047/2784/9619/31/3156/4597/348/7108/6721/3157/3422/2194/6319
GO POSITIVE REGULATION OF ALPHA BETA T CELL DIFFERENTIATION	POSITIVE REGULATION OF ALPHA BETA T CELL DIFFERENTIATION	46	0.602167	1.75948	0.00135549	0.0114329	0.00822099	3371	tags=43%, list=18%, signal=36%	301/8651/54440/861/3606/64332/3965/942/4860/7048/2737/864/51043/3566/865/6850/3071/3142/9308/387
GO MEMBRANE RAFT ASSEMBLY	MEMBRANE RAFT ASSEMBLY	11	0.833132	1.78858	0.00135968	0.0114541	0.00823624	2186	tags=73%, list=11%, signal=64%	302/6281/857/858/23180/2013/10211/2319
GO MAINTENANCE OF SYNAPSE STRUCTURE	MAINTENANCE OF SYNAPSE STRUCTURE	15	-0.775266	-1.86658	0.00136665	0.0114987	0.00826831	1988	tags=73%, list=10%, signal=66%	1639/1488/26059/8831/1741/1740/5864/8927/577/10882/4983
GO REGULATION OF ADENYLATE CYCLASE ACTIVITY	REGULATION OF ADENYLATE CYCLASE ACTIVITY	35	-0.634966	-1.84535	0.00137554	0.0115593	0.00831185	2820	tags=37%, list=15%, signal=32%	2912/776/775/9495/10142/3208/5064/1394/4763/2913/1910/84059/9568
GO MONOAMINE TRANSPORT	MONOAMINE TRANSPORT	87	-0.476867	-1.68795	0.00139159	0.0116737	0.00839411	2168	tags=38%, list=11%, signal=34%	150/4204/83849/1815/51760/3737/23208/65018/11188/5071/7432/2668/6804/2824/6861/84258/9066/143425/6622/3350/148281/64805/3356/18/57586/6857/1141/1137/6860/6623/11255/3745/1113
GO DNA CONFORMATION CHANGE	DNA CONFORMATION CHANGE	314	0.385555	1.42115	0.00139257	0.0116737	0.00839411	3730	tags=29%, list=19%, signal=24%	301/891/55723/85236/51203/7153/79682/1058/983/3006/55355/64151/4171/8318/3148/10051/5982/23397/51659/8208/8345/64105/11339/9837/79019/3020/201161/387103/64946/23421/5888/8970/3014/8438/113130/8365/641/1643/8294/4175/3159/55839/4174/7314/91687/4172/5983/8353/84875/54892/4173/3017/83743/6742/1069/8357/378708/5984/10036/84296/79075/57798/8520/3087/8349/10856/84515/8347/5928/57082/2491/83990/1029/666…
GO HISTONE DEMETHYLASE ACTIVITY H3 K9 SPECIFIC	HISTONE DEMETHYLASE ACTIVITY H3 K9 SPECIFIC	13	-0.790934	-1.8323	0.00139741	0.0116999	0.00841293	1631	tags=46%, list=9%, signal=42%	5253/80853/51780/23030/55806/221037
GO CELLULAR RESPONSE TO MECHANICAL STIMULUS	CELLULAR RESPONSE TO MECHANICAL STIMULUS	79	0.522828	1.67643	0.00140356	0.011737	0.0084396	3873	tags=56%, list=20%, signal=45%	1277/358/1647/7132/4615/1535/834/355/2022/50848/3659/4055/3673/958/4316/1265/1956/8795/841/6548/1111/476/578/5734/8915/8772/835/642658/5743/2697/4214/7098/6513/51311/6662/8740/4790/51284/9020/3553/1605/9780/5879/441027
GO PARALLEL FIBER TO PURKINJE CELL SYNAPSE	PARALLEL FIBER TO PURKINJE CELL SYNAPSE	16	-0.749055	-1.82409	0.00140771	0.0117573	0.00845422	2501	tags=81%, list=13%, signal=71%	1496/27255/794/5332/440279/3760/57863/9127/2895/2892/869/3765/6712
GO GLUTATHIONE PEROXIDASE ACTIVITY	GLUTATHIONE PEROXIDASE ACTIVITY	20	0.735177	1.81267	0.00141422	0.0117973	0.00848295	1785	tags=40%, list=9%, signal=36%	241/493869/2882/2876/9588/4258/373156/4257
GO GASTRULATION	GASTRULATION	178	0.427401	1.4969	0.00142298	0.0118558	0.00852508	2581	tags=26%, list=13%, signal=23%	1284/4318/1290/4323/2335/3678/1289/3912/1295/3679/3675/4313/2139/3691/8862/286204/3689/57045/1291/187/1969/8324/3688/91663/6615/3673/2260/79971/51176/1303/7048/4838/3693/22943/2296/3676/3690/2132/60436/145258/3557/3685/642658/2697/2719/7474
GO REGULATION OF T CELL DIFFERENTIATION	REGULATION OF T CELL DIFFERENTIATION	138	0.455426	1.56075	0.00143855	0.0119617	0.00860122	3451	tags=34%, list=18%, signal=28%	301/972/4192/2302/3111/8651/10875/3659/11221/54440/861/3606/84695/914/64332/3965/10385/942/5788/4860/3559/7048/2737/27166/864/2064/11006/51043/3566/2177/3718/10288/80149/865/6850/3071/3575/4773/2175/3142/9308/3574/146850/387/639/2736/5771
GO RIBONUCLEOSIDE CATABOLIC PROCESS	RIBONUCLEOSIDE CATABOLIC PROCESS	21	0.730942	1.82449	0.00143919	0.0119617	0.00860122	2647	tags=48%, list=14%, signal=41%	27350/7378/60489/51816/9582/200316/4860/140564/191/978
GO RESPIRASOME	RESPIRASOME	86	0.521297	1.69223	0.00144798	0.0120202	0.00864327	6191	tags=66%, list=32%, signal=45%	56901/84419/440567/4696/4725/27089/1340/647087/54205/1349/1346/10975/4697/7386/55101/4713/6392/7388/6390/51079/4695/1337/4707/4708/29796/9377/84701/4717/4711/1351/4700/55967/1347/4710/4709/25994/4728/4694/4706/135154/4701/4712/4726/5018/790955/4729/90871/7384/4702/1537/4731/54539/126328/9167/192286/56964/4724
GO EXTRINSIC APOPTOTIC SIGNALING PATHWAY	EXTRINSIC APOPTOTIC SIGNALING PATHWAY	221	0.40836	1.46844	0.00145402	0.0120557	0.0086688	2843	tags=30%, list=15%, signal=26%	5054/51330/3958/50486/7042/857/3162/64114/7132/2537/467/7057/3383/2139/355/597/6591/3148/6672/4000/162989/836/2876/4055/8829/29108/2070/7040/2923/8692/3304/581/8717/2260/7128/8795/841/2730/5788/8406/10413/8743/3082/578/3429/5499/8737/7133/1495/10572/7185/8915/8772/85450/8996/672/835/8794/367/3685/2261/970/7046/7098/7857/219699/51079
GO RESPONSE TO DOPAMINE	RESPONSE TO DOPAMINE	95	-0.462356	-1.64583	0.00146877	0.0121632	0.0087461	3507	tags=26%, list=18%, signal=22%	27065/2776/54331/5594/1815/25/3361/3358/2932/5071/3397/5999/5064/57657/3350/3356/1132/50632/8787/111/1128/2775/2774/11255/51617
GO NEGATIVE REGULATION OF TYPE I INTERFERON PRODUCTION	NEGATIVE REGULATION OF TYPE I INTERFERON PRODUCTION	45	0.597523	1.73251	0.00147838	0.0122195	0.0087866	3320	tags=42%, list=17%, signal=35%	9636/84282/9111/51191/84868/29108/5971/64135/7128/3661/79132/9641/84166/10859/10293/7318/3586/9246/23586
GO LIPOPOLYSACCHARIDE MEDIATED SIGNALING PATHWAY	LIPOPOLYSACCHARIDE MEDIATED SIGNALING PATHWAY	59	0.550324	1.68327	0.00147915	0.0122195	0.0087866	2318	tags=37%, list=12%, signal=33%	4057/6347/23643/114769/929/6352/7097/3606/4067/85363/7040/3656/9450/7128/3661/3055/388325/11027/4282/8915/10221/5724
GO REGULATION OF CYCLIN DEPENDENT PROTEIN KINASE ACTIVITY	REGULATION OF CYCLIN DEPENDENT PROTEIN KINASE ACTIVITY	99	0.493392	1.63239	0.00148572	0.0122589	0.00881494	2893	tags=36%, list=15%, signal=31%	9077/1031/1647/84722/891/9133/1164/890/1033/29950/1026/51191/26524/1163/5347/836/7026/990/1019/60/995/1956/7128/641/1050/151195/5155/5311/2810/3087/79616/9088/993/900/898/1029
GO GOLGI ASSOCIATED VESICLE MEMBRANE	GOLGI ASSOCIATED VESICLE MEMBRANE	107	0.485983	1.63422	0.00151402	0.0124774	0.00897201	3026	tags=32%, list=16%, signal=27%	3122/3123/3115/3113/972/3117/3127/3119/3118/11015/567/10945/11014/51226/3120/9871/23433/2348/3134/3133/10959/9554/149111/84888/10972/1315/90411/374/2697/553115/1174/3998/23423/51014
GO ANTIGEN PROCESSING AND PRESENTATION OF ENDOGENOUS ANTIGEN	ANTIGEN PROCESSING AND PRESENTATION OF ENDOGENOUS ANTIGEN	22	0.719733	1.8335	0.00152864	0.0125827	0.00904774	4803	tags=77%, list=25%, signal=58%	972/567/3077/6890/2217/3134/100507436/3133/4277/563/64167/6892/6891/51752/912/3135/9474
GO ENDOPLASMIC RETICULUM GOLGI INTERMEDIATE COMPARTMENT MEMBRANE	ENDOPLASMIC RETICULUM GOLGI INTERMEDIATE COMPARTMENT MEMBRANE	70	0.543068	1.71291	0.00153697	0.0126361	0.00908614	3789	tags=49%, list=20%, signal=39%	5265/1075/1522/10945/51226/81671/6890/811/54732/10960/2348/50999/10959/340061/9554/149111/57222/51614/6836/10972/10282/10134/90411/374/10652/3998/23423/51014/11018/966/6892/1604/6891/9780
GO MUSCLE CELL PROLIFERATION	MUSCLE CELL PROLIFERATION	190	0.425106	1.50473	0.00154213	0.0126418	0.00909025	2682	tags=32%, list=14%, signal=28%	3486/4318/3488/10135/6648/7042/891/3162/7057/8840/4313/1482/283/1535/6352/1026/2006/983/8862/80310/3725/9510/6772/3606/57190/3673/284/5292/1956/2260/7128/4193/6909/199/10413/7048/5159/8737/1839/2296/7043/3569/4211/51135/4856/5155/10221/348093/6774/4854/6502/5724/1264/2773/147912/5031/79647/5743/2697/7052/7046
GO EXOCRINE SYSTEM DEVELOPMENT	EXOCRINE SYSTEM DEVELOPMENT	49	0.593431	1.74636	0.00154231	0.0126418	0.00909025	2911	tags=41%, list=15%, signal=35%	7042/5154/6591/57045/998/8829/7040/29842/1956/23129/2260/79971/3481/10371/3082/2296/7043/3321/7052/6662
GO AXON INITIAL SEGMENT	AXON INITIAL SEGMENT	18	-0.737376	-1.82472	0.00154322	0.0126418	0.00909025	2791	tags=78%, list=15%, signal=66%	57554/287/3786/274/57731/288/286/6334/89796/885/6323/4130/4133/3785
GO AMINE BIOSYNTHETIC PROCESS	AMINE BIOSYNTHETIC PROCESS	23	0.707315	1.829	0.00154846	0.0126695	0.00911017	2265	tags=26%, list=12%, signal=23%	26002/6611/6303/4946/4953/6723
GO SIGNAL TRANSDUCTION INVOLVED IN CELL CYCLE CHECKPOINT	SIGNAL TRANSDUCTION INVOLVED IN CELL CYCLE CHECKPOINT	73	0.525953	1.66304	0.00155175	0.0126813	0.00911862	2452	tags=34%, list=13%, signal=30%	1647/891/1017/1026/6790/983/5111/1263/5347/51512/51514/144455/1869/581/995/4193/4582/51499/1111/11200/3276/672/835/79733/2810
GO NEGATIVE REGULATION OF INFLAMMATORY RESPONSE	NEGATIVE REGULATION OF INFLAMMATORY RESPONSE	136	0.463655	1.58459	0.00155907	0.0127107	0.00913978	3936	tags=37%, list=21%, signal=29%	9021/6288/7130/4192/7132/55872/5176/56833/11221/2876/134/29108/2213/2896/8530/54/284207/7128/5788/3559/284467/89790/3082/79626/1003/7133/5734/4856/5692/55829/80149/5682/6223/7850/215/5580/3586/2629/4790/225/64838/5771/5925/4907/66005/2358/2950/1588/2294/5468
GO POSITIVE REGULATION OF EPITHELIAL CELL MIGRATION	POSITIVE REGULATION OF EPITHELIAL CELL MIGRATION	140	0.45136	1.55155	0.00155907	0.0127107	0.00913978	3236	tags=31%, list=17%, signal=26%	301/4318/27286/7422/3315/7042/7114/3162/7057/57381/3675/3725/5606/5216/8829/4233/3673/8754/811/7040/3037/284/2896/958/2260/2821/6776/7048/25865/1839/5155/3690/80149/5743/7474/152007/51564/9270/2246/6662/2324/4780/5025
GO REGULATION OF RECEPTOR SIGNALING PATHWAY VIA STAT	REGULATION OF RECEPTOR SIGNALING PATHWAY VIA STAT	135	0.456603	1.55989	0.00157482	0.0128238	0.00922112	2643	tags=24%, list=14%, signal=21%	9021/857/3976/7132/8835/23529/602/6352/8651/1489/83666/11314/5175/3059/3606/4067/958/3588/3280/2149/5788/1545/5008/3569/54625/3587/10019/54741/6774/3718/3575/51094/2261
GO NUCLEOTIDE EXCISION REPAIR DNA GAP FILLING	NUCLEOTIDE EXCISION REPAIR DNA GAP FILLING	23	0.706039	1.8257	0.00159562	0.0129777	0.00933176	4438	tags=70%, list=23%, signal=53%	5111/6119/5982/7314/5983/5424/5984/6118/3978/10714/6117/5425/7316/7311/5985/57804
GO EPITHELIAL CELL APOPTOTIC PROCESS	EPITHELIAL CELL APOPTOTIC PROCESS	99	0.491641	1.6266	0.00159891	0.012989	0.00933989	3925	tags=35%, list=21%, signal=28%	5054/57124/6424/4192/6347/3162/7057/3383/7538/51129/641700/196527/284/831/958/80781/1869/7128/7048/3676/3569/1870/2934/7857/3586/3875/10298/4780/3791/677/5925/2621/5294/598/382
GO CELLULAR RESPONSE TO CADMIUM ION	CELLULAR RESPONSE TO CADMIUM ION	36	0.633529	1.76466	0.00161129	0.013074	0.00940105	1693	tags=39%, list=9%, signal=36%	4318/4499/3162/4493/4504/4502/3725/2353/4489/1536/1956/653361/4496/4495
GO INTERLEUKIN 6 BIOSYNTHETIC PROCESS	INTERLEUKIN 6 BIOSYNTHETIC PROCESS	24	0.70082	1.84637	0.00161778	0.0131111	0.0094277	2981	tags=46%, list=16%, signal=39%	972/2302/7305/1051/64581/7096/8915/6774/5724/6850/3635
GO IMMUNOGLOBULIN PRODUCTION INVOLVED IN IMMUNOGLOBULIN MEDIATED IMMUNE RESPONSE	IMMUNOGLOBULIN PRODUCTION INVOLVED IN IMMUNOGLOBULIN MEDIATED IMMUNE RESPONSE	57	0.573307	1.73716	0.00165194	0.0133721	0.00961535	3323	tags=33%, list=17%, signal=28%	3119/23529/7037/23075/10875/7040/958/9156/202309/5788/10538/10459/7374/695/6778/2067/3586/8741/9466
GO AMINOGLYCAN METABOLIC PROCESS	AMINOGLYCAN METABOLIC PROCESS	168	0.435186	1.5148	0.00166778	0.0134843	0.00969607	3594	tags=39%, list=19%, signal=32%	2331/633/960/4060/6385/93010/6382/3339/3074/1634/9953/9435/2990/4166/2799/2517/84002/6383/2720/54480/7040/3037/284/8692/1486/9653/5292/79586/3161/2817/84752/11046/113189/6548/23670/5159/3082/2296/5155/2132/23169/22856/2239/133584/11227/2683/2719/9334/56548/10082/9957/2588/6484/1464/6448/3073/29940/9955/4790/9394/92370/54982/4969/57214/337876/3553
GO POSTSYNAPTIC MEMBRANE ORGANIZATION	POSTSYNAPTIC MEMBRANE ORGANIZATION	40	-0.59563	-1.79378	0.00168447	0.0136032	0.00978156	2594	tags=45%, list=14%, signal=39%	1399/5649/54413/22871/2668/10243/388336/2743/85358/1742/348/57555/4038/64101/9379/375323/9378/729956
GO REGULATION OF B CELL MEDIATED IMMUNITY	REGULATION OF B CELL MEDIATED IMMUNITY	52	0.578793	1.72292	0.00168766	0.0136128	0.00978847	3323	tags=35%, list=17%, signal=29%	2207/2302/23529/718/7037/5819/7040/2213/958/3133/5788/5777/10459/695/6778/3586/8741/9466
GO CONDENSED NUCLEAR CHROMOSOME KINETOCHORE	CONDENSED NUCLEAR CHROMOSOME KINETOCHORE	15	0.775635	1.77669	0.00169324	0.0136257	0.00979774	1003	tags=60%, list=5%, signal=57%	891/1058/10403/699/83540/5347/64105/701/79980
GO SUPEROXIDE GENERATING NADPH OXIDASE ACTIVITY	SUPEROXIDE GENERATING NADPH OXIDASE ACTIVITY	10	0.844158	1.76183	0.00169324	0.0136257	0.00979774	1502	tags=50%, list=8%, signal=46%	1535/1536/4688/653361/50507
GO POSTSYNAPTIC SIGNAL TRANSDUCTION	POSTSYNAPTIC SIGNAL TRANSDUCTION	36	-0.599271	-1.75689	0.00169938	0.0136496	0.00981489	774	tags=25%, list=4%, signal=24%	23373/1132/1141/1137/23236/4062/1128/11255/8851
GO ENDOPEPTIDASE COMPLEX	ENDOPEPTIDASE COMPLEX	64	0.546907	1.68964	0.0017002	0.0136496	0.00981489	4295	tags=45%, list=22%, signal=35%	3315/5696/5698/5714/5701/5688/5721/5704/5686/5692/5711/5691/90637/5682/5683/5690/5689/5720/5700/10213/5699/9690/11047/5718/5684/5719/5685/5715/5708
GO CELLULAR GLUCURONIDATION	CELLULAR GLUCURONIDATION	18	-0.734099	-1.81661	0.00170252	0.0136521	0.00981671	570	tags=11%, list=3%, signal=11%	55347/5581
GO REGULATION OF SYNAPTIC VESICLE RECYCLING	REGULATION OF SYNAPTIC VESICLE RECYCLING	25	-0.671866	-1.78943	0.0017207	0.0137817	0.00990992	2806	tags=60%, list=15%, signal=51%	808/23208/6517/2259/1609/114781/1759/22871/56850/9066/6622/5532/57030/26052/112755
GO ALPHA BETA T CELL DIFFERENTIATION	ALPHA BETA T CELL DIFFERENTIATION	100	0.494798	1.64119	0.0017231	0.0137848	0.0099121	3380	tags=37%, list=18%, signal=31%	301/602/8651/3659/54440/861/3606/1880/84695/91543/5971/64332/3965/942/51176/4860/10538/7048/2737/864/5734/3569/51043/3566/6774/3718/6932/80149/865/6850/6778/3071/3142/944/9308/387/639
GO CELL CELL ADHESION MEDIATED BY INTEGRIN	CELL CELL ADHESION MEDIATED BY INTEGRIN	16	0.764613	1.78259	0.00172612	0.0137928	0.00991789	2546	tags=69%, list=13%, signal=60%	255743/3678/6352/23075/3688/83706/8754/1803/3676/916/5420
GO CYTOPLASMIC MICROTUBULE ORGANIZATION	CYTOPLASMIC MICROTUBULE ORGANIZATION	53	-0.542557	-1.75349	0.00175196	0.013983	0.0100546	2118	tags=38%, list=11%, signal=34%	6683/9748/84376/57562/23332/7430/27175/5048/10844/50861/157922/85378/55704/23271/1778/79187/4926/667/57662/4137
GO REGULATION OF MICROTUBULE POLYMERIZATION OR DEPOLYMERIZATION	REGULATION OF MICROTUBULE POLYMERIZATION OR DEPOLYMERIZATION	81	-0.475611	-1.65617	0.0017608	0.0140338	0.0100911	3413	tags=47%, list=18%, signal=39%	10300/10634/4204/6904/25/1027/22924/58526/27124/6683/50810/89927/10982/89795/23332/57551/1639/50861/324/146057/157922/10142/51199/25999/2258/6622/23271/4926/23122/10297/4130/81551/11075/4133/57662/10382/4137/8851
GO POSITIVE REGULATION OF B CELL ACTIVATION	POSITIVE REGULATION OF B CELL ACTIVATION	76	0.517229	1.63515	0.00176376	0.0140338	0.0100911	3287	tags=36%, list=17%, signal=30%	4323/972/23529/10451/1026/7037/54440/1880/10673/7040/958/5788/683/8660/10459/3569/4282/51293/7293/6850/695/6778/3071/4773/3635/8741/3574
GO MELANOSOME MEMBRANE	MELANOSOME MEMBRANE	14	0.782275	1.75532	0.00176449	0.0140338	0.0100911	2279	tags=36%, list=12%, signal=31%	10457/10981/55686/5873/23682
GO MITOCHONDRIAL TRANSLATION	MITOCHONDRIAL TRANSLATION	137	0.45343	1.55186	0.00178445	0.014176	0.0101934	5851	tags=49%, list=31%, signal=34%	64960/6183/64979/51373/64981/115416/51253/64983/55168/28998/10352/29088/57129/55052/64968/63875/10102/2617/84769/51001/29093/54148/3396/57038/55157/128308/64951/7818/9553/55173/65003/54998/6150/51069/708/92259/740/64928/22868/81554/79072/51067/51081/387338/51073/4701/5018/64976/65005/64975/116541/51023/51258/219927/6182/51264/51649/122704/55699/60488/54938/54931/9617/51650/283459/116540/55245
GO POSITIVE REGULATION OF INTERLEUKIN 10 PRODUCTION	POSITIVE REGULATION OF INTERLEUKIN 10 PRODUCTION	36	0.629662	1.75388	0.00179188	0.0142185	0.010224	3044	tags=39%, list=16%, signal=33%	2207/54209/602/7097/54440/29108/64581/3965/29126/3082/947/6850/353514/9308
GO REGULATION OF NITRIC OXIDE BIOSYNTHETIC PROCESS	REGULATION OF NITRIC OXIDE BIOSYNTHETIC PROCESS	57	0.570746	1.72939	0.00180076	0.0142723	0.0102627	3855	tags=39%, list=20%, signal=31%	5806/857/3383/706/3689/9104/2717/3043/445/1191/64581/54/199/5311/947/80149/5743/3586/5025/3553/948/5879
GO IRON ION HOMEOSTASIS	IRON ION HOMEOSTASIS	79	0.517265	1.65859	0.00184508	0.0146067	0.0105031	1145	tags=18%, list=6%, signal=17%	4057/55240/3162/1356/6556/2512/57817/567/7037/26872/79901/3077/8692/30061
GO REGULATION OF MICROTUBULE DEPOLYMERIZATION	REGULATION OF MICROTUBULE DEPOLYMERIZATION	29	-0.64948	-1.80733	0.00185011	0.0146296	0.0105196	2753	tags=69%, list=14%, signal=59%	9181/10013/10300/58526/6683/50810/89927/89795/23332/57551/324/146057/157922/2258/23271/23122/10297/4130/11075/57662
GO C4 DICARBOXYLATE TRANSPORT	C4 DICARBOXYLATE TRANSPORT	21	-0.699854	-1.79846	0.00185311	0.0146363	0.0105244	752	tags=29%, list=4%, signal=27%	83733/6511/18/56262/6506/6505
GO COPPER ION BINDING	COPPER ION BINDING	56	0.55729	1.67942	0.00185525	0.0146363	0.0105244	3852	tags=43%, list=20%, signal=34%	26002/6649/4015/1356/4017/4016/6284/4504/283/84695/2817/5066/84171/285362/4494/9616/6283/5025/388753/7157/3552/10063/475/150684
GO ANION CHANNEL ACTIVITY	ANION CHANNEL ACTIVITY	85	-0.460885	-1.62179	0.00186492	0.0146891	0.0105623	2769	tags=29%, list=14%, signal=25%	1183/1182/2557/57348/121601/203859/1185/23507/2560/57719/2743/2558/2561/94015/8001/56262/2554/144453/6509/57030/2566/2565/2563/2556/2562
GO REGULATION OF INTRINSIC APOPTOTIC SIGNALING PATHWAY	REGULATION OF INTRINSIC APOPTOTIC SIGNALING PATHWAY	160	0.43348	1.50572	0.00186623	0.0146891	0.0105623	3896	tags=34%, list=20%, signal=28%	4318/6280/6648/3315/972/960/857/6279/5329/8531/83596/6591/2876/1649/6615/5034/3065/29108/1191/51060/581/90993/4193/4582/2023/51499/7314/220042/624/4282/79156/10134/8996/55829/8382/4487/5743/6201/51079/4780/57007/54929/53832/4170/10961/7009/7157/5771/120892/5770/3303/5326/3932/598/11035
GO REGULATION OF SIGNALING RECEPTOR ACTIVITY	REGULATION OF SIGNALING RECEPTOR ACTIVITY	167	-0.399038	-1.5142	0.00187886	0.0147714	0.0106216	2887	tags=32%, list=15%, signal=28%	6886/88/54800/57554/5728/867/100462977/868/729993/1393/50488/5649/65018/23641/6714/2903/54413/22871/2904/388336/10142/4884/66004/59284/85358/1741/59283/9148/407738/1742/1612/81832/23467/10368/25927/57555/1740/4747/50944/338328/2892/8787/22941/27092/4062/2890/23542/5923/10369/729956/2893/2891/2902/9241
GO PROTEIN LOCALIZATION TO CELL PERIPHERY	PROTEIN LOCALIZATION TO CELL PERIPHERY	324	-0.341988	-1.38193	0.00188931	0.0148365	0.0106684	2354	tags=27%, list=12%, signal=24%	23096/6711/2803/285172/26088/23426/783/4040/8416/23555/2903/92482/7430/2037/57120/23241/118813/9053/9847/10243/388336/56850/23043/5593/84687/1804/3799/57731/10966/25999/5064/23136/2258/22841/288/59284/9693/20/10580/59283/55227/22979/286/1742/6242/2905/6844/4118/23095/403/9912/5525/5602/4644/4926/30845/10368/5590/5295/23122/5727/5581/1740/63971/5864/2770/6812/89958/27092/53616/57628/115827/5911/57…
GO INORGANIC ANION TRANSMEMBRANE TRANSPORT	INORGANIC ANION TRANSMEMBRANE TRANSPORT	113	-0.428341	-1.55902	0.00189294	0.014848	0.0106766	2769	tags=27%, list=14%, signal=24%	1183/1182/11095/6560/2557/2915/63982/57348/121601/203859/10861/1185/2560/9990/57719/2743/2558/2561/94015/8001/2554/57468/144453/6509/57030/6505/2566/2565/2563/2556/2562
GO REGULATION OF EXTRINSIC APOPTOTIC SIGNALING PATHWAY	REGULATION OF EXTRINSIC APOPTOTIC SIGNALING PATHWAY	153	0.441912	1.533	0.00191587	0.0150041	0.0107889	2263	tags=30%, list=12%, signal=27%	5054/51330/3958/50486/857/3162/64114/2537/467/7057/3383/2139/355/6591/3148/6672/4000/162989/2876/4055/8829/29108/2070/2923/8692/3304/8717/2260/7128/8795/841/2730/5788/8406/10413/8743/3082/5499/8737/1495/7185/8915/8772/85450/8996/672
GO RESPONSE TO ENDOPLASMIC RETICULUM STRESS	RESPONSE TO ENDOPLASMIC RETICULUM STRESS	286	0.384909	1.41534	0.00191724	0.0150041	0.0107889	4215	tags=34%, list=22%, signal=27%	857/3576/115290/6347/116496/467/11015/7057/9601/837/6464/1051/7060/4000/3725/55741/23645/1649/10954/56005/5034/811/55062/7873/3309/10130/2213/57333/2923/1191/51060/9820/23753/581/57761/8795/90993/6734/8406/26608/83590/578/51136/26270/81502/10956/58477/91147/10211/10952/2135/57414/10134/7184/10106/79094/55829/118424/4189/91319/51726/23071/439/121506/54499/81542/4780/550/10113/64764/1861/10961/5443…
GO CHEMOSENSORY BEHAVIOR	CHEMOSENSORY BEHAVIOR	17	-0.729585	-1.79176	0.00192739	0.0150663	0.0108336	1847	tags=41%, list=10%, signal=37%	4009/54429/130507/55636/50944/5582/2902
GO CALYX OF HELD	CALYX OF HELD	24	-0.686211	-1.80868	0.00195582	0.015271	0.0109808	2763	tags=62%, list=14%, signal=54%	3736/3737/793/3776/23413/440279/28964/6453/3746/5582/5579/9256/23025/10815/10814
GO DNA REPLICATION INITIATION	DNA REPLICATION INITIATION	37	0.635223	1.78683	0.00196112	0.0152949	0.010998	3621	tags=57%, list=19%, signal=46%	1017/4171/8318/990/4998/4175/4174/4172/5427/4173/81620/23594/5001/23649/898/222229/54107/5558/55388/5557/56655
GO INFLAMMATORY RESPONSE TO WOUNDING	INFLAMMATORY RESPONSE TO WOUNDING	11	0.823381	1.76765	0.0019657	0.0153132	0.0110111	1677	tags=64%, list=9%, signal=58%	7076/4192/3162/7040/2896/2149/89790
GO CYTOPLASMIC REGION	CYTOPLASMIC REGION	238	-0.365844	-1.4321	0.00197282	0.0153512	0.0110384	3695	tags=31%, list=19%, signal=25%	9742/282991/55717/23187/2332/66000/10239/79659/22863/10564/8632/11337/6416/6687/5594/2899/27445/2035/4976/10749/10084/5905/7014/1496/6683/6792/25981/23332/1639/2037/1488/5048/10121/440279/140730/22906/3208/26059/3799/22999/7881/23710/55638/1742/8541/5813/23095/23162/5874/1778/8120/9783/4926/5590/23122/667/1740/4747/3800/11127/9699/2770/4130/8927/89958/4133/2898/3798/10382/9026/547/1641/4137/23025
GO MECHANORECEPTOR DIFFERENTIATION	MECHANORECEPTOR DIFFERENTIATION	62	-0.499758	-1.65915	0.00198521	0.01543	0.0110951	1832	tags=26%, list=10%, signal=23%	5048/4916/3516/652/57216/23493/2558/4851/2561/4610/84059/388585/4915/2562/28514/10083
GO AXO DENDRITIC TRANSPORT	AXO DENDRITIC TRANSPORT	67	-0.503369	-1.69178	0.00199524	0.0154903	0.0111385	1527	tags=37%, list=8%, signal=34%	4976/10749/7014/6683/5048/22906/3799/320/55638/5813/23095/23162/5874/1778/8120/667/1740/4747/3800/11127/4130/4133/3798/547/4137
GO STRUCTURAL MOLECULE ACTIVITY CONFERRING ELASTICITY	STRUCTURAL MOLECULE ACTIVITY CONFERRING ELASTICITY	12	0.794765	1.72356	0.00200956	0.0155838	0.0112057	487	tags=50%, list=3%, signal=49%	90187/3915/11117/10516/84034/2006
GO PLATELET AGGREGATION	PLATELET AGGREGATION	60	0.553917	1.69237	0.00201432	0.015603	0.0112195	2618	tags=40%, list=14%, signal=35%	10630/1192/3315/10627/2316/10398/50848/114897/3043/83706/4067/1465/928/5341/60/5777/84959/5912/71/3690/10019/4627/6850/7414
GO INHIBITORY SYNAPSE	INHIBITORY SYNAPSE	17	-0.727477	-1.78658	0.00203879	0.0157747	0.011343	2699	tags=59%, list=14%, signal=51%	23208/54413/140679/2572/22997/84966/57555/2571/440073/375323
GO POSITIVE REGULATION OF MONOCYTE CHEMOTAXIS	POSITIVE REGULATION OF MONOCYTE CHEMOTAXIS	18	0.741074	1.77916	0.00204619	0.015814	0.0113713	1490	tags=33%, list=8%, signal=31%	5054/3627/6352/196527/1230/199
GO PRESYNAPTIC MEMBRANE ORGANIZATION	PRESYNAPTIC MEMBRANE ORGANIZATION	11	-0.802908	-1.77134	0.00206108	0.015911	0.011441	2783	tags=73%, list=15%, signal=62%	5728/54413/22871/6900/11141/57555/5789/4038
GO COLLAGEN ACTIVATED SIGNALING PATHWAY	COLLAGEN ACTIVATED SIGNALING PATHWAY	14	0.778094	1.74594	0.00207678	0.0160142	0.0115152	2474	tags=57%, list=13%, signal=50%	1282/1284/1277/3673/126014/84959/4921/6850
GO CHLORIDE TRANSMEMBRANE TRANSPORTER ACTIVITY	CHLORIDE TRANSMEMBRANE TRANSPORTER ACTIVITY	97	-0.459569	-1.64697	0.00209389	0.0161157	0.0115882	2769	tags=29%, list=14%, signal=25%	1183/1182/6560/2557/57348/121601/203859/10861/1185/2560/9990/57719/2743/2558/2561/94015/8001/2554/57468/144453/6509/57030/6505/2566/2565/2563/2556/2562
GO REGULATION OF GRANULOCYTE CHEMOTAXIS	REGULATION OF GRANULOCYTE CHEMOTAXIS	43	0.594566	1.72167	0.00209565	0.0161157	0.0115882	1634	tags=26%, list=9%, signal=23%	5919/972/4192/3576/7057/728/6352/5880/7060/719/683
GO PROTEASOMAL UBIQUITIN INDEPENDENT PROTEIN CATABOLIC PROCESS	PROTEASOMAL UBIQUITIN INDEPENDENT PROTEIN CATABOLIC PROCESS	22	0.71381	1.81842	0.00209702	0.0161157	0.0115882	4223	tags=68%, list=22%, signal=53%	5696/5698/5688/5686/5692/5691/5682/5683/5690/5689/4780/5699/5684/5685/8507
GO GLUCOSYLTRANSFERASE ACTIVITY	GLUCOSYLTRANSFERASE ACTIVITY	18	0.73953	1.77545	0.00210682	0.0161659	0.0116243	3421	tags=61%, list=18%, signal=50%	143888/8985/7357/2997/29929/29880/8908/79070/79053/2629/2992
GO GOLGI LUMEN	GOLGI LUMEN	99	0.484651	1.60347	0.00210828	0.0161659	0.0116243	2922	tags=26%, list=15%, signal=22%	2331/633/4323/6649/4060/5154/6385/6382/3339/5627/1634/6383/51150/7040/2817/4582/4320/83452/5155/2239/2719/7474/10082/9957/1464/5125
GO LEUKOCYTE HOMEOSTASIS	LEUKOCYTE HOMEOSTASIS	84	0.509668	1.648	0.00214126	0.0164003	0.0117928	3415	tags=37%, list=18%, signal=30%	301/972/2207/9133/10312/1880/10673/836/4067/30061/581/202309/3965/7128/3559/578/3569/4282/10019/8915/8772/3718/4004/3071/11151/29985/83700/8740/5293/27240/6372
GO ACTIVATION OF JANUS KINASE ACTIVITY	ACTIVATION OF JANUS KINASE ACTIVITY	15	0.77001	1.76381	0.00215353	0.0164758	0.0118471	781	tags=20%, list=4%, signal=19%	6352/8651/11314
GO CYTIDINE DEAMINASE ACTIVITY	CYTIDINE DEAMINASE ACTIVITY	12	0.792494	1.71864	0.00216296	0.016511	0.0118724	2647	tags=50%, list=14%, signal=43%	27350/60489/9582/200316/140564/978
GO TOLL LIKE RECEPTOR BINDING	TOLL LIKE RECEPTOR BINDING	12	0.792327	1.71827	0.00216296	0.016511	0.0118724	1407	tags=58%, list=7%, signal=54%	6280/6279/23643/4615/81622/7097/7096
GO DNA STRAND ELONGATION INVOLVED IN DNA REPLICATION	DNA STRAND ELONGATION INVOLVED IN DNA REPLICATION	17	0.739199	1.74751	0.00216983	0.016545	0.0118969	3538	tags=65%, list=18%, signal=53%	5111/51659/9837/4172/5983/4173/5984/84296/3978/10714/5425
GO POSITIVE REGULATION OF EPITHELIAL TO MESENCHYMAL TRANSITION	POSITIVE REGULATION OF EPITHELIAL TO MESENCHYMAL TRANSITION	47	0.596067	1.74942	0.00217688	0.0165743	0.0119179	2092	tags=43%, list=11%, signal=38%	10630/1277/7042/4192/4017/25937/182/7291/2022/286204/7041/6615/7040/2146/51176/7048/2296/7043/3569/6386
GO SPINDLE ORGANIZATION	SPINDLE ORGANIZATION	167	0.433814	1.5085	0.00217853	0.0165743	0.0119179	3457	tags=33%, list=18%, signal=27%	991/84722/4605/332/891/2316/22974/24137/10783/9212/6790/10460/10403/4751/83540/9055/3833/25886/5347/9493/7272/387103/3304/29127/115106/259266/284403/6491/11200/79998/9700/1062/7283/27243/10615/8841/4627/1104/203068/57405/10636/26271/5901/23636/90417/3832/55154/55521/79866/93323/79000/23354/387/114327/54627
GO CHLORIDE TRANSPORT	CHLORIDE TRANSPORT	107	-0.426077	-1.53806	0.00218251	0.0165826	0.0119239	3139	tags=34%, list=16%, signal=28%	7439/1080/5243/1183/1182/1207/6560/2557/2915/63982/57348/121601/203859/10861/1185/2560/5593/9990/57719/2743/57282/2558/2561/94015/8001/2554/57468/144453/6509/57030/6505/2566/2565/2563/2556/2562
GO REGULATION OF ALPHA BETA T CELL DIFFERENTIATION	REGULATION OF ALPHA BETA T CELL DIFFERENTIATION	62	0.537849	1.65773	0.00218448	0.0165826	0.0119239	3380	tags=39%, list=18%, signal=32%	301/8651/54440/861/3606/84695/64332/3965/942/4860/7048/2737/864/51043/3566/3718/80149/865/6850/3071/3142/9308/387/639
GO PRODUCTION OF MOLECULAR MEDIATOR INVOLVED IN INFLAMMATORY RESPONSE	PRODUCTION OF MOLECULAR MEDIATOR INVOLVED IN INFLAMMATORY RESPONSE	65	0.524919	1.62893	0.00221352	0.0167844	0.012069	3278	tags=38%, list=17%, signal=32%	5054/2207/4615/8673/56833/240/11221/84818/4067/29108/63940/2896/64581/4843/115362/3566/80149/6850/695/6223/7850/215/8773/3620/225
GO GTPASE REGULATOR ACTIVITY	GTPASE REGULATOR ACTIVITY	300	-0.343291	-1.37508	0.00221674	0.0167902	0.0120732	3833	tags=35%, list=20%, signal=28%	9882/54662/80728/84986/2665/27352/140885/51520/116985/5903/10059/79735/2776/1123/7070/116987/8131/414189/23365/6904/2664/23329/6654/1122/5900/10527/642517/9681/55738/6002/9135/5905/80243/4649/57584/83478/216/9826/10144/8437/9462/9605/58504/3996/23108/253959/116988/115703/7249/60682/9515/1793/55160/2909/153090/84364/394/29/23232/134957/84253/5364/28964/23158/57465/9910/9779/54453/5999/8831/22999/9…
GO ADULT LOCOMOTORY BEHAVIOR	ADULT LOCOMOTORY BEHAVIOR	77	-0.484403	-1.65712	0.00222197	0.0168103	0.0120877	2496	tags=38%, list=13%, signal=33%	80243/2906/26058/2055/1267/5071/1949/114781/5048/2668/6900/8997/22876/57731/7248/2743/6622/477/51286/6323/55636/3766/124925/53616/28996/2257/6623/2902/23544
GO CD40 SIGNALING PATHWAY	CD40 SIGNALING PATHWAY	12	0.791388	1.71624	0.00222432	0.0168103	0.0120877	2954	tags=58%, list=15%, signal=49%	3678/54209/3688/958/7128/2177/2175
GO REGULATION OF SYSTEMIC ARTERIAL BLOOD PRESSURE BY RENIN ANGIOTENSIN	REGULATION OF SYSTEMIC ARTERIAL BLOOD PRESSURE BY RENIN ANGIOTENSIN	26	0.683757	1.80769	0.00223165	0.0168471	0.0121141	3464	tags=46%, list=18%, signal=38%	1535/1522/2028/1636/2149/2150/84909/5125/1066/10159/387/5345
GO POSITIVE REGULATION OF T CELL MEDIATED IMMUNITY	POSITIVE REGULATION OF T CELL MEDIATED IMMUNITY	48	0.583377	1.70701	0.00225912	0.0170357	0.0122497	2523	tags=40%, list=13%, signal=34%	567/54440/5819/3077/3606/2217/91543/3554/3134/100507436/3133/5788/4277/7855/3569/5817/8772/7784/563
GO REGULATION OF CD4 POSITIVE ALPHA BETA T CELL ACTIVATION	REGULATION OF CD4 POSITIVE ALPHA BETA T CELL ACTIVATION	60	0.548642	1.67626	0.00226416	0.0170396	0.0122525	3044	tags=35%, list=16%, signal=30%	301/8651/57045/54440/861/3606/84695/64332/3965/942/29126/7048/864/51043/3566/3718/80149/865/3071/3142/9308
GO SPECTRIN BINDING	SPECTRIN BINDING	28	-0.642258	-1.76876	0.00226463	0.0170396	0.0122525	2821	tags=68%, list=15%, signal=58%	2035/287/118/2039/2037/2784/157922/57731/4651/288/23271/286/1780/119/5798/120/11127/57662/10083
GO POSITIVE REGULATION OF NIK NF KAPPAB SIGNALING	POSITIVE REGULATION OF NIK NF KAPPAB SIGNALING	76	0.510502	1.61389	0.00227222	0.0170779	0.0122801	3826	tags=34%, list=20%, signal=27%	1116/7205/56892/929/54209/7097/3606/84868/811/81/1956/8717/3965/8795/8877/3987/11156/7098/9618/8740/10392/387/51284/3553/3654/3611
GO MEMBRANE DEPOLARIZATION DURING CARDIAC MUSCLE CELL ACTION POTENTIAL	MEMBRANE DEPOLARIZATION DURING CARDIAC MUSCLE CELL ACTION POTENTIAL	22	-0.673048	-1.73775	0.00228453	0.0171516	0.012333	3570	tags=59%, list=19%, signal=48%	6324/6546/6330/776/287/775/783/288/477/781/610/6327/55800
GO RESPONSE TO CADMIUM ION	RESPONSE TO CADMIUM ION	60	0.547736	1.67349	0.00229539	0.0172142	0.012378	3085	tags=38%, list=16%, signal=32%	4318/4499/3162/4493/4504/983/5111/4502/3725/1841/2353/4489/1536/1956/653361/4496/4495/4494/4521/2934/2067/2937/5536
GO CEREBELLAR CORTEX DEVELOPMENT	CEREBELLAR CORTEX DEVELOPMENT	47	-0.557556	-1.74572	0.00231397	0.0173345	0.0124646	2080	tags=43%, list=11%, signal=38%	4761/5270/5781/22891/16/146057/4628/8861/51286/8925/85442/64211/2895/124925/869/23017/4983/6712/28514/23544
GO MITOTIC SPINDLE ORGANIZATION	MITOTIC SPINDLE ORGANIZATION	106	0.477197	1.60258	0.00233238	0.0174533	0.01255	1894	tags=27%, list=10%, signal=25%	991/84722/4605/332/891/2316/22974/24137/9212/6790/10460/10403/4751/83540/9055/3833/25886/5347/9493/7272/3304/29127/284403/6491/11200/79998/1062/7283/27243
GO REGULATION OF IMMUNOGLOBULIN PRODUCTION	REGULATION OF IMMUNOGLOBULIN PRODUCTION	64	0.536907	1.65875	0.00233578	0.0174595	0.0125545	3414	tags=31%, list=18%, signal=26%	3598/23529/7037/54440/7040/2213/958/3133/5788/2821/10459/115004/3569/3566/7293/6778/3586/8741/9466/7009
GO POSITIVE REGULATION OF DENDRITE DEVELOPMENT	POSITIVE REGULATION OF DENDRITE DEVELOPMENT	75	-0.486419	-1.66283	0.00233926	0.0174665	0.0125595	2966	tags=47%, list=15%, signal=40%	1523/816/655/23363/10059/2332/29882/1627/4976/79791/5649/6792/26039/7074/153090/5048/22871/8997/11141/6453/7804/100132074/85358/9148/348/23373/55607/9231/50944/22849/5789/22941/5063/29993/23316
GO REGULATION OF DENDRITIC SPINE MORPHOGENESIS	REGULATION OF DENDRITIC SPINE MORPHOGENESIS	45	-0.567031	-1.76505	0.00236127	0.0176115	0.0126638	2853	tags=51%, list=15%, signal=44%	1627/5728/4976/5649/10152/115703/54413/7074/5048/22871/8997/7804/25791/85358/10611/9762/80725/9912/55607/5063/23316/26052/8851
GO TRANSLATIONAL TERMINATION	TRANSLATIONAL TERMINATION	105	0.480443	1.61159	0.00236609	0.0176283	0.0126758	5781	tags=51%, list=30%, signal=36%	64960/6183/55337/64979/51373/64981/51253/64983/55168/28998/29088/57129/55052/64968/143244/63875/29093/1984/51504/54148/3396/128308/2107/64951/7818/9553/55173/65003/54998/6150/51069/92259/740/64928/51081/51073/5018/64976/65005/64975/116541/51023/51258/219927/6182/51264/51649/122704/56648/60488/6059/9617/51650/116540
GO L TYPE VOLTAGE GATED CALCIUM CHANNEL COMPLEX	L TYPE VOLTAGE GATED CALCIUM CHANNEL COMPLEX	12	-0.783639	-1.77149	0.00237343	0.0176444	0.0126875	2762	tags=67%, list=14%, signal=57%	9722/776/775/783/59284/59283/781/27092
GO PARANODE REGION OF AXON	PARANODE REGION OF AXON	12	-0.783782	-1.77182	0.00237343	0.0176444	0.0126875	2763	tags=67%, list=14%, signal=57%	3736/22933/57165/57731/23136/6326/57471/4099
GO NEGATIVE REGULATION OF ACTIVATED T CELL PROLIFERATION	NEGATIVE REGULATION OF ACTIVATED T CELL PROLIFERATION	11	0.817762	1.75558	0.0023812	0.0176456	0.0126883	1433	tags=55%, list=7%, signal=50%	80380/2615/836/3965/10385/29126
GO SYNCYTIUM FORMATION	SYNCYTIUM FORMATION	59	0.53977	1.65099	0.00238129	0.0176456	0.0126883	2159	tags=31%, list=11%, signal=27%	3627/9518/5738/30846/8038/7305/54209/26509/963/4283/8754/135228/928/22904/10211/4627/3566/6988
GO RESPONSE TO VITAMIN D	RESPONSE TO VITAMIN D	34	0.628482	1.73187	0.00238367	0.0176456	0.0126883	2031	tags=35%, list=11%, signal=32%	6696/3627/3371/6781/6591/25959/5764/2242/5292/920/1594/5251
GO BONE MINERALIZATION	BONE MINERALIZATION	111	0.465352	1.56869	0.00238825	0.0176456	0.0126883	2911	tags=33%, list=15%, signal=28%	4057/4256/1278/10457/4015/3381/56975/3491/9636/29887/7291/5552/5764/51374/196527/7040/1893/7071/54829/1230/22904/1594/2268/7043/4921/10269/5744/5251/7286/54795/338773/5743/2719/2261/116039/5167/6662
GO LYMPHOCYTE MIGRATION	LYMPHOCYTE MIGRATION	112	0.466232	1.57682	0.00238825	0.0176456	0.0126883	4311	tags=37%, list=23%, signal=29%	6288/3627/4478/9547/6347/3383/6352/4267/8764/50848/6373/1880/80270/29108/51192/1893/199/58191/3676/6364/80024/8772/3683/64005/6362/7474/8740/9466/5293/387/6693/6354/2621/5294/11035/729230/6355/284114/10344/11240/2625
GO POSITIVE REGULATION OF ALPHA BETA T CELL ACTIVATION	POSITIVE REGULATION OF ALPHA BETA T CELL ACTIVATION	60	0.547061	1.67143	0.00238908	0.0176456	0.0126883	3044	tags=37%, list=16%, signal=31%	301/8651/54440/861/3606/64332/3133/3965/942/5788/4860/7048/2737/864/916/51043/3566/865/6850/3071/3142/9308
GO GLUTAMATE BINDING	GLUTAMATE BINDING	10	-0.821541	-1.79459	0.00239596	0.0176601	0.0126987	1613	tags=70%, list=8%, signal=64%	1373/2904/2572/2729/2571/6505/2902
GO NEURON MIGRATION	NEURON MIGRATION	160	-0.389238	-1.4752	0.00239622	0.0176601	0.0126987	3109	tags=35%, list=16%, signal=30%	5747/58158/266727/9201/1952/57688/57556/79791/1399/2624/1496/5649/2534/6792/25836/84197/1630/340533/153090/5048/4916/57698/323/6900/54541/6376/7155/4628/460/2258/9693/55079/92737/26012/85508/429/23060/116983/2823/23284/89796/6656/54328/885/2066/221692/6695/1951/8941/10718/815/4692/1641/8851/4915/83482
GO MICROVILLUS	MICROVILLUS	85	0.505922	1.63645	0.00240611	0.0177139	0.0127374	2546	tags=28%, list=13%, signal=25%	10630/4478/960/768/5154/362/760/10788/1800/25932/5021/7040/284/8692/1836/8842/9936/4641/6624/3690/64005/7412/3685/5420
GO REPLICATION FORK	REPLICATION FORK	71	0.516584	1.63247	0.00242031	0.0177993	0.0127988	3707	tags=42%, list=19%, signal=34%	5111/8318/6119/5982/51659/3014/641/8914/4172/5983/10286/5424/5984/7516/6118/84296/56852/11169/23649/54962/10714/29980/5558/55388/7157/5557/6117/79991/5425/80119
GO ZINC ION HOMEOSTASIS	ZINC ION HOMEOSTASIS	37	0.627346	1.76468	0.00244705	0.0179746	0.0129248	2445	tags=35%, list=13%, signal=31%	6280/6279/4499/4493/4504/4502/4489/64116/148867/4496/4495/64924/4494
GO PYRIMIDINE RIBONUCLEOSIDE METABOLIC PROCESS	PYRIMIDINE RIBONUCLEOSIDE METABOLIC PROCESS	14	0.771134	1.73032	0.00245153	0.0179746	0.0129248	2647	tags=50%, list=14%, signal=43%	27350/7378/60489/9582/200316/140564/978
GO MODIFICATION DEPENDENT PROTEIN BINDING	MODIFICATION DEPENDENT PROTEIN BINDING	146	-0.405456	-1.52604	0.00245204	0.0179746	0.0129248	4304	tags=39%, list=22%, signal=30%	9425/254225/79831/55023/65980/10927/84148/124997/84656/54454/10013/57332/23172/10594/6872/8535/2332/88455/81550/3300/22909/5252/23468/6597/55904/169981/10133/84289/26013/55793/54737/287/11176/55689/29117/4300/7158/56893/116988/124359/29978/26108/54799/57680/5253/80853/112869/8019/161725/9666/51035/124930/54764/23170/4297/26038/10771
GO HYDROGEN PEROXIDE METABOLIC PROCESS	HYDROGEN PEROXIDE METABOLIC PROCESS	56	0.55192	1.66324	0.00245694	0.0179912	0.0129368	2526	tags=29%, list=13%, signal=25%	4129/4504/1535/5880/10549/3240/3043/3039/2876/9588/1536/1956/5052/3040/6774/255027
GO CELLULAR RESPONSE TO REACTIVE OXYGEN SPECIES	CELLULAR RESPONSE TO REACTIVE OXYGEN SPECIES	154	0.434599	1.50646	0.00247205	0.0180825	0.0130024	3183	tags=32%, list=17%, signal=27%	301/4318/358/6648/6649/10516/890/1017/4504/4313/1800/983/5111/80310/9104/3725/1894/1728/2353/4233/140823/84557/1956/5052/7128/4193/2146/653361/1545/7295/3082/8737/3569/2643/51022/5311/2861/51526/695/6778/55364/4358/2308/5536/5580/3586/4780/2176/5074
GO PLATELET DERIVED GROWTH FACTOR BINDING	PLATELET DERIVED GROWTH FACTOR BINDING	11	0.81635	1.75255	0.00247709	0.0181	0.013015	642	tags=64%, list=3%, signal=62%	1282/1281/1277/1278/1289/5154/1291
GO NEGATIVE REGULATION OF PRODUCTION OF MOLECULAR MEDIATOR OF IMMUNE RESPONSE	NEGATIVE REGULATION OF PRODUCTION OF MOLECULAR MEDIATOR OF IMMUNE RESPONSE	36	0.622236	1.7332	0.00248231	0.0181187	0.0130285	2306	tags=33%, list=12%, signal=29%	3598/7042/3162/684/3077/7040/2213/284/3134/7043/3718/10859
GO REGULATION OF DEVELOPMENTAL GROWTH	REGULATION OF DEVELOPMENTAL GROWTH	325	-0.335047	-1.35235	0.00250672	0.0182774	0.0131426	3157	tags=31%, list=16%, signal=26%	596/23499/2664/5747/9706/9113/583/58529/8879/79068/29882/5629/657/25/1627/1027/51760/57556/5728/57611/8455/55777/57678/3776/5950/2803/151835/2932/10038/8437/6792/25836/5465/23286/1630/5071/23414/7430/23105/2254/7473/5048/4916/57698/9362/659/118813/3516/4654/10743/652/10507/10500/3720/10509/84258/57731/5999/80351/2258/5802/59284/22999/23493/2660/56920/4851/348/57715/51761/9254/64218/22902/223117/1…
GO POSITIVE REGULATION OF CELL CYCLE PROCESS	POSITIVE REGULATION OF CELL CYCLE PROCESS	281	0.394976	1.44419	0.00253108	0.0184353	0.0132562	3885	tags=32%, list=20%, signal=26%	301/1647/11065/891/51203/1017/9212/1026/9787/6790/983/81610/5111/10403/8318/1263/25886/9510/51512/1894/9493/84967/1490/990/1019/998/201161/51514/144455/1869/4085/29127/8444/581/995/1956/2260/4193/113130/4582/2146/199/51499/3481/11200/5159/9700/10926/10615/3276/5155/9928/81620/5311/672/10733/835/79733/51529/2810/4487/26271/7474/2191/993/286053/898/23636/6840/994/7161/2735/5566/55571/29766/387/7157…
GO DENDRITIC SPINE MEMBRANE	DENDRITIC SPINE MEMBRANE	15	-0.756402	-1.82116	0.00253388	0.0184361	0.0132567	2417	tags=60%, list=13%, signal=52%	729993/4355/3748/388336/84687/5064/2890/23109/729956
GO CELLULAR RESPONSE TO ACID CHEMICAL	CELLULAR RESPONSE TO ACID CHEMICAL	206	0.409644	1.46095	0.00254513	0.0184982	0.0133014	2709	tags=26%, list=14%, signal=22%	1282/1281/1277/1278/358/1290/7422/3371/891/8463/1958/5176/4313/57817/1535/8651/80310/1291/1051/8324/1019/445/3199/4067/1869/1536/2348/10542/11344/1956/5165/28956/2730/10413/4831/6494/5734/3399/6470/5155/2042/5311/4830/1307/5724/64121/80149/5031/389541/4776/7474/9076/3779
GO INNERVATION	INNERVATION	27	-0.653433	-1.76887	0.00255669	0.0185625	0.0133476	1455	tags=44%, list=8%, signal=41%	5270/4884/2558/2561/5979/55636/5582/494470/55959/26018/23025/2562
GO RESPONSE TO FIBROBLAST GROWTH FACTOR	RESPONSE TO FIBROBLAST GROWTH FACTOR	142	0.443692	1.52848	0.00257178	0.0186522	0.0134121	1956	tags=23%, list=10%, signal=20%	10631/1277/81848/960/10252/3371/3576/53834/6347/56975/8826/7057/10253/7538/6352/8862/5441/200734/79801/1490/678/8692/2817/2260/90993/161742/2730/25865/5438/2591/5439/5725
GO REGULATION OF BLOOD PRESSURE	REGULATION OF BLOOD PRESSURE	180	0.422472	1.48594	0.002589	0.0187572	0.0134876	3464	tags=29%, list=18%, signal=24%	10631/1278/133/10135/6648/3162/59/1535/1889/1522/8862/5742/57085/1268/50848/5021/3043/134/7026/59342/2028/4843/1636/2013/2149/476/5547/94/2150/2643/84909/5155/146/5973/947/5724/6051/6518/367/5743/2697/128/2053/585/5125/1066/64167/10159/5025/6915/387/5345
GO ARACHIDONIC ACID SECRETION	ARACHIDONIC ACID SECRETION	31	0.637894	1.72739	0.00263845	0.019075	0.0137161	2474	tags=26%, list=13%, signal=23%	301/5320/5322/5321/1636/624/4282/6850
GO NEGATIVE REGULATION OF INTERLEUKIN 1 PRODUCTION	NEGATIVE REGULATION OF INTERLEUKIN 1 PRODUCTION	31	0.63864	1.72941	0.00263845	0.019075	0.0137161	4453	tags=48%, list=23%, signal=37%	114769/54209/1992/54206/54/7128/80149/7850/945/80772/3586/2950/2621/5371/22900
GO ANCHORED COMPONENT OF SYNAPTIC VESICLE MEMBRANE	ANCHORED COMPONENT OF SYNAPTIC VESICLE MEMBRANE	13	-0.771729	-1.78781	0.00264927	0.019116	0.0137456	2220	tags=54%, list=12%, signal=48%	25837/5869/80331/5874/5864/115827/6853
GO ACUTE INFLAMMATORY RESPONSE TO ANTIGENIC STIMULUS	ACUTE INFLAMMATORY RESPONSE TO ANTIGENIC STIMULUS	22	0.705753	1.79789	0.00264972	0.019116	0.0137456	2484	tags=41%, list=13%, signal=36%	2207/718/3383/1268/2213/3133/55829/7784/695
GO RESPONSE TO ANTINEOPLASTIC AGENT	RESPONSE TO ANTINEOPLASTIC AGENT	97	0.475397	1.56832	0.00266116	0.019176	0.0137887	4203	tags=43%, list=22%, signal=34%	358/3162/3383/1958/5176/5111/2706/4924/1019/445/114907/8754/54206/22949/5888/1956/387758/641/8914/1978/1495/3728/5155/5106/672/5724/80149/1317/9076/11335/5906/2308/2629/8751/56160/1719/1499/23514/6142/1977/8837/440
GO POSITIVE REGULATION OF INTERLEUKIN 1 PRODUCTION	POSITIVE REGULATION OF INTERLEUKIN 1 PRODUCTION	57	0.562661	1.7049	0.00266391	0.019176	0.0137887	2905	tags=32%, list=15%, signal=27%	6288/3315/7305/1958/79792/834/84868/29108/64581/3428/3965/841/7855/11027/4332/7474/353514/51311
GO REGULATION OF TRANSCRIPTION INVOLVED IN G1 S TRANSITION OF MITOTIC CELL CYCLE	REGULATION OF TRANSCRIPTION INVOLVED IN G1 S TRANSITION OF MITOTIC CELL CYCLE	28	0.656658	1.74073	0.00266987	0.019176	0.0137887	3785	tags=54%, list=20%, signal=43%	6241/7298/5111/8318/990/4998/144455/1869/81620/26271/898/5925/1719/1876/8900
GO LYMPHOCYTE APOPTOTIC PROCESS	LYMPHOCYTE APOPTOTIC PROCESS	71	0.514861	1.62703	0.00267014	0.019176	0.0137887	2593	tags=34%, list=14%, signal=29%	3958/972/9212/6352/10945/4067/581/3965/29126/3559/2737/27166/578/8737/8660/1942/4282/8915/8772/3718/695/171558/7474/3575
GO DNA REPLICATION INDEPENDENT NUCLEOSOME ORGANIZATION	DNA REPLICATION INDEPENDENT NUCLEOSOME ORGANIZATION	55	0.55552	1.66686	0.00267206	0.019176	0.0137887	4034	tags=49%, list=21%, signal=39%	55723/79682/1058/55355/64105/11339/79019/3020/387103/64946/23421/8365/8294/55839/91687/378708/8520/5928/57082/2491/54107/201254/55320/8363/8367/8607/54069
GO EXOPEPTIDASE ACTIVITY	EXOPEPTIDASE ACTIVITY	111	0.462973	1.56068	0.00269551	0.0193239	0.0138951	3136	tags=27%, list=16%, signal=23%	165/4323/54504/10404/1800/1522/8836/51056/59342/2028/5476/1803/1368/290/2687/1636/5547/10269/84909/5184/23549/6051/29952/2191/79716/51200/91039/64167/1362/54858
GO L GLUTAMATE TRANSMEMBRANE TRANSPORT	L GLUTAMATE TRANSMEMBRANE TRANSPORT	23	-0.682208	-1.7919	0.00272052	0.0194828	0.0140094	3185	tags=57%, list=17%, signal=47%	6512/8864/79751/57084/2055/246213/477/83733/6511/3766/6506/57030/6505
GO RAB GTPASE BINDING	RAB GTPASE BINDING	174	-0.383079	-1.45954	0.00272621	0.0195031	0.014024	3876	tags=39%, list=20%, signal=31%	140775/9882/54662/26985/2665/9909/27352/85377/10260/10059/25924/79735/23299/4905/55667/8408/2664/23329/9727/1122/10938/5866/81846/10133/23085/51479/6293/92558/3996/8416/23274/126003/9515/89781/23232/134957/23158/140730/23312/9910/94121/64780/22895/9779/54453/22841/22999/57553/160518/23258/9905/57533/23637/115704/83874/6305/8567/64145/9783/4644/9853/117177/11127/9699/84440/129049/4336
GO HEMATOPOIETIC STEM CELL DIFFERENTIATION	HEMATOPOIETIC STEM CELL DIFFERENTIATION	83	0.520093	1.67837	0.0027434	0.0195988	0.0140928	4311	tags=51%, list=23%, signal=39%	4005/5696/5698/861/5714/3214/5701/1636/1021/10413/5008/5688/5721/10538/5704/2296/5686/5692/5711/5691/4004/865/5682/5683/51441/5690/7161/5689/54517/4780/5720/5700/7157/10213/5699/5718/5684/5719/5685/5715/5708/2625
GO REGULATION OF CD8 POSITIVE ALPHA BETA T CELL ACTIVATION	REGULATION OF CD8 POSITIVE ALPHA BETA T CELL ACTIVATION	15	0.761071	1.74333	0.00274533	0.0195988	0.0140928	2564	tags=73%, list=13%, signal=64%	8651/3659/861/3077/3133/29126/864/51043/10859/865/3071
GO KERATAN SULFATE CATABOLIC PROCESS	KERATAN SULFATE CATABOLIC PROCESS	12	0.785875	1.70428	0.00277656	0.0198011	0.0142382	3534	tags=67%, list=18%, signal=54%	2331/4060/3074/2799/2720/2588/3073/4969
GO INTERLEUKIN 1 MEDIATED SIGNALING PATHWAY	INTERLEUKIN 1 MEDIATED SIGNALING PATHWAY	99	0.481986	1.59466	0.00278745	0.0198581	0.0142792	4295	tags=47%, list=22%, signal=37%	3556/4615/1958/5696/5698/5714/3656/5701/3554/5688/5721/7314/5704/3569/5686/51135/5692/5711/5691/3557/5682/7444/8878/5683/7850/5690/1326/5689/5720/4790/10392/5700/10213/5699/3552/3553/5718/7316/5684/3654/7311/8454/5719/5685/5715/7334/5708
GO NEGATIVE REGULATION OF CELL CYCLE G2 M PHASE TRANSITION	NEGATIVE REGULATION OF CELL CYCLE G2 M PHASE TRANSITION	101	0.477983	1.59701	0.00280009	0.0199273	0.014329	4295	tags=42%, list=22%, signal=32%	9212/6790/5696/983/5698/22809/5347/990/5714/51514/4998/5701/641/1111/5688/5721/5704/5686/63967/672/5692/5711/5691/3364/5682/5683/5690/29980/60561/5689/5720/5700/10213/5699/5718/23194/5684/8454/5719/5685/5715/5708
GO PHASIC SMOOTH MUSCLE CONTRACTION	PHASIC SMOOTH MUSCLE CONTRACTION	21	-0.68457	-1.75918	0.00281055	0.0199549	0.0143488	1758	tags=24%, list=9%, signal=22%	2668/3815/1908/1910/6752
GO REGULATION OF EPITHELIAL CELL DIFFERENTIATION	REGULATION OF EPITHELIAL CELL DIFFERENTIATION	142	0.441991	1.52262	0.00281216	0.0199549	0.0143488	1910	tags=27%, list=10%, signal=24%	5054/4318/7422/6424/857/3976/7132/2302/1903/25937/7538/1513/4435/2487/182/1051/50848/861/6772/3204/1514/135228/5920/54206/8842/3280/406/6608/23764/2146/10413/4831/4838/1594/94/2296/1003/6009
GO SCAVENGER RECEPTOR ACTIVITY	SCAVENGER RECEPTOR ACTIVITY	52	0.565366	1.68295	0.00281273	0.0199549	0.0143488	3210	tags=33%, list=17%, signal=27%	9332/3426/4481/4017/3959/84695/56241/81035/8685/23166/58191/84171/284297/5167/84466/57007/136853
GO INTERSTRAND CROSS LINK REPAIR	INTERSTRAND CROSS LINK REPAIR	53	0.564988	1.68939	0.00281823	0.0199656	0.0143565	3835	tags=43%, list=20%, signal=35%	29089/6119/10635/55215/5888/7314/91442/2177/378708/6118/7398/146956/84515/64858/2067/2175/199990/201254/2176/55159/6117/7316/7311
GO PHOTORECEPTOR CELL DIFFERENTIATION	PHOTORECEPTOR CELL DIFFERENTIATION	61	-0.50344	-1.65984	0.00282008	0.0199656	0.0143565	2154	tags=23%, list=11%, signal=20%	80184/7068/118427/348980/23418/4851/403/1826/85407/1641/4915/92211/10083/30812
GO SALIVARY GLAND DEVELOPMENT	SALIVARY GLAND DEVELOPMENT	38	0.608273	1.72662	0.00282812	0.0200018	0.0143825	1936	tags=37%, list=10%, signal=33%	7042/5154/6591/57045/998/8829/7040/29842/1956/23129/2260/10371/3082/7043
GO MACROPHAGE DIFFERENTIATION	MACROPHAGE DIFFERENTIATION	43	0.58726	1.70051	0.00284076	0.0200543	0.0144203	3513	tags=44%, list=18%, signal=36%	4318/7422/3976/714/7097/6688/3059/998/7040/841/920/1050/8737/10221/8772/10100/139716/5771/5925
GO REGULATION OF DNA BINDING TRANSCRIPTION FACTOR ACTIVITY	REGULATION OF DNA BINDING TRANSCRIPTION FACTOR ACTIVITY	418	0.360833	1.35611	0.00284141	0.0200543	0.0144203	3936	tags=29%, list=21%, signal=24%	4057/6280/7422/6424/857/6279/7114/3162/54360/2302/114769/3556/8061/2316/3383/4615/7291/3689/8323/6737/6672/7097/10346/8553/3725/3059/3606/1611/84868/2353/8321/1649/2535/85363/29108/57413/958/1191/3304/338382/5292/3656/8717/3965/7128/6608/2146/2307/1545/26508/8877/8896/7314/25865/3055/4838/6883/340061/8737/7546/7188/10459/3569/84875/4921/3728/150372/9830/60401/3399/4919/10211/149951/9464/84166/718…
GO CONDENSED NUCLEAR CHROMOSOME CENTROMERIC REGION	CONDENSED NUCLEAR CHROMOSOME CENTROMERIC REGION	26	0.676838	1.7894	0.00285981	0.0201548	0.0144925	1561	tags=46%, list=8%, signal=42%	891/9212/1058/6790/10403/699/83540/5347/64105/701/79980/151648
GO POSITIVE REGULATION OF AMINO ACID TRANSPORT	POSITIVE REGULATION OF AMINO ACID TRANSPORT	18	-0.715846	-1.77144	0.00286155	0.0201548	0.0144925	715	tags=33%, list=4%, signal=32%	885/5027/18/6812/6529/6860
GO MULTI ORGANISM CELLULAR PROCESS	MULTI ORGANISM CELLULAR PROCESS	49	0.576762	1.6973	0.00288994	0.0203335	0.014621	3805	tags=45%, list=20%, signal=36%	4057/7852/5478/5819/3665/140823/8692/64135/89848/1234/920/3661/330/340061/79132/7105/8780/55601/23586/26065/708/2621
GO NEGATIVE REGULATION OF ADENYLATE CYCLASE ACTIVITY	NEGATIVE REGULATION OF ADENYLATE CYCLASE ACTIVITY	25	-0.657718	-1.75175	0.00289288	0.0203335	0.014621	2820	tags=32%, list=15%, signal=27%	2912/9495/10142/5064/2913/1910/84059/9568
GO OLIGODENDROCYTE DIFFERENTIATION	OLIGODENDROCYTE DIFFERENTIATION	94	-0.443967	-1.57861	0.00290232	0.0203789	0.0146537	1980	tags=32%, list=10%, signal=29%	54413/9331/443/84504/6900/22891/745/27242/20/56978/4763/429/3400/4851/79885/10810/4099/3766/55553/6547/79152/5354/388585/4915/10215/118738/116448/23500/2840/30812
GO TELOMERE MAINTENANCE VIA SEMI CONSERVATIVE REPLICATION	TELOMERE MAINTENANCE VIA SEMI CONSERVATIVE REPLICATION	27	0.663492	1.76222	0.0029371	0.0206019	0.0148141	4438	tags=67%, list=23%, signal=51%	5111/6119/5982/5983/5427/5424/5984/6118/23649/10714/54107/5558/5557/6117/5425/56655/5985/57804
GO NEGATIVE REGULATION OF CYTOKINE BIOSYNTHETIC PROCESS	NEGATIVE REGULATION OF CYTOKINE BIOSYNTHETIC PROCESS	31	0.631913	1.71119	0.00294095	0.0206078	0.0148183	3243	tags=45%, list=17%, signal=38%	2302/7305/7538/602/9111/54206/5788/28951/3569/10859/3635/79589/3586/4790
GO CHAPERONE MEDIATED PROTEIN FOLDING	CHAPERONE MEDIATED PROTEIN FOLDING	57	0.561446	1.70121	0.00296155	0.0207309	0.0149068	4022	tags=42%, list=21%, signal=33%	126393/3315/972/3310/9601/2289/3337/64175/3309/1191/3304/5479/2280/9141/55898/2281/3336/79031/27348/1861/3303/10576/10491/30001
GO LONG TERM MEMORY	LONG TERM MEMORY	33	-0.597908	-1.72621	0.00297952	0.0208353	0.0149819	1254	tags=42%, list=7%, signal=40%	793/5649/114781/114/2648/814/348/5590/50944/22849/2890/57030/5923/2902
GO GLIAL CELL ACTIVATION	GLIAL CELL ACTIVATION	53	0.56175	1.67971	0.00298903	0.0208804	0.0150143	3672	tags=51%, list=19%, signal=41%	10135/712/7305/54209/728/1075/3689/7097/3725/25825/2896/1191/8530/1956/6608/199/5788/8877/284467/3569/7098/3684/51311/51284/120892/3553/2358
GO T CELL DIFFERENTIATION INVOLVED IN IMMUNE RESPONSE	T CELL DIFFERENTIATION INVOLVED IN IMMUNE RESPONSE	67	0.532553	1.66614	0.00301623	0.0210489	0.0151355	2715	tags=33%, list=14%, signal=28%	301/2207/602/10875/3606/1880/84695/5971/64332/3965/942/51176/10538/5734/3569/51043/3566/6774/3718/80149/6778/26253
GO CELLULAR RESPONSE TO VITAMIN	CELLULAR RESPONSE TO VITAMIN	30	0.659091	1.77189	0.00302429	0.0210836	0.0151604	2031	tags=40%, list=11%, signal=36%	10631/1277/3371/6591/25959/5764/2242/5292/2348/4193/1594/5251
GO POSITIVE REGULATION OF RESPONSE TO CYTOKINE STIMULUS	POSITIVE REGULATION OF RESPONSE TO CYTOKINE STIMULUS	57	0.560253	1.6976	0.0030809	0.0214564	0.0154285	3805	tags=46%, list=20%, signal=37%	972/7852/54209/837/834/83666/7097/3665/3304/3554/64135/146722/3661/10555/8737/54625/9641/84166/8772/117854/7474/3574/23586/26065/3303/2621
GO INSULIN SECRETION INVOLVED IN CELLULAR RESPONSE TO GLUCOSE STIMULUS	INSULIN SECRETION INVOLVED IN CELLULAR RESPONSE TO GLUCOSE STIMULUS	63	-0.507677	-1.6956	0.00309217	0.0215129	0.0154691	3526	tags=38%, list=18%, signal=31%	1392/5019/150/2822/1080/8938/9854/9572/7074/3799/5799/22841/114/3156/55638/8398/5532/5798/408/5581/7447/9024/111/2850
GO NEURON MATURATION	NEURON MATURATION	48	-0.527627	-1.67781	0.00311213	0.0216083	0.0155377	1972	tags=31%, list=10%, signal=28%	9331/6900/6376/57731/5881/84530/5979/1910/27289/577/10882/59277/26047/51412/30819
GO MICROVILLUS MEMBRANE	MICROVILLUS MEMBRANE	23	0.684729	1.77059	0.00311221	0.0216083	0.0155377	2546	tags=39%, list=13%, signal=34%	10630/4478/768/1800/1836/8842/3690/3685/5420
GO BONE GROWTH	BONE GROWTH	46	0.581885	1.70021	0.00312549	0.0216785	0.0155882	3638	tags=48%, list=19%, signal=39%	302/1292/64856/6781/1291/1293/25886/2121/4147/1893/7373/1303/7048/7059/4921/10269/2261/85301/5447/5915/10498/4148
GO GLYCINE BINDING	GLYCINE BINDING	14	-0.755848	-1.777	0.00313804	0.0217435	0.0156349	1613	tags=43%, list=8%, signal=39%	2904/27232/2743/8001/116443/2902
GO PHOSPHOLIPID DEPHOSPHORYLATION	PHOSPHOLIPID DEPHOSPHORYLATION	37	-0.583932	-1.7232	0.00315389	0.0218312	0.015698	2783	tags=35%, list=15%, signal=30%	5728/27124/163404/8897/66036/8867/8776/22876/3632/196051/9108/79948/54886
GO CELL MIGRATION INVOLVED IN SPROUTING ANGIOGENESIS	CELL MIGRATION INVOLVED IN SPROUTING ANGIOGENESIS	54	0.554744	1.65705	0.0031699	0.0219198	0.0157617	3371	tags=39%, list=18%, signal=32%	301/4223/27286/7422/3162/7057/57381/1948/7101/3688/8829/2050/161742/161198/54567/5743/51564/9270/6915/3791/387
GO NEGATIVE REGULATION OF AXONOGENESIS	NEGATIVE REGULATION OF AXONOGENESIS	68	-0.486708	-1.63677	0.00319574	0.0220762	0.0158741	2057	tags=37%, list=11%, signal=33%	1630/23105/1949/7473/10507/10500/10509/8831/2258/5802/56920/4168/57715/64218/22902/223117/65078/4099/4038/4133/4974/84894/10501/8851/7143
GO POSITIVE REGULATION OF KILLING OF CELLS OF OTHER ORGANISM	POSITIVE REGULATION OF KILLING OF CELLS OF OTHER ORGANISM	15	0.756158	1.73208	0.00320562	0.022122	0.0159071	2474	tags=40%, list=13%, signal=35%	2597/5551/64581/4843/2150/6850
GO SENSORY PERCEPTION OF CHEMICAL STIMULUS	SENSORY PERCEPTION OF CHEMICAL STIMULUS	475	-0.314728	-1.30243	0.00321564	0.0221688	0.0159407	3586	tags=4%, list=19%, signal=3%	259290/4025/259294/51764/89797/40/51308/7480/284521/130507/390429/50832/5141/123041/6339/9311/4685/41/285093
GO MITOCHONDRIAL TRANSLATIONAL TERMINATION	MITOCHONDRIAL TRANSLATIONAL TERMINATION	89	0.488698	1.60049	0.00322024	0.0221781	0.0159474	5781	tags=53%, list=30%, signal=37%	64960/6183/64979/51373/64981/51253/64983/55168/28998/29088/57129/55052/64968/63875/29093/54148/3396/128308/64951/7818/9553/55173/65003/54998/6150/51069/92259/740/64928/51081/51073/5018/64976/65005/64975/116541/51023/51258/219927/6182/51264/51649/122704/60488/9617/51650/116540
GO REGULATION OF ACUTE INFLAMMATORY RESPONSE TO ANTIGENIC STIMULUS	REGULATION OF ACUTE INFLAMMATORY RESPONSE TO ANTIGENIC STIMULUS	13	0.800863	1.76995	0.0032385	0.0222714	0.0160145	2484	tags=62%, list=13%, signal=54%	2207/718/1268/2213/3133/55829/7784/695
GO MEMBRANE INVAGINATION	MEMBRANE INVAGINATION	69	0.513915	1.62003	0.0032403	0.0222714	0.0160145	3936	tags=51%, list=21%, signal=40%	4481/2207/55113/718/7057/54209/9212/5880/3689/11314/998/3673/2209/196527/2213/8685/199/54874/2150/27243/9938/51429/4627/391/8724/3071/2934/3684/84466/387/51411/375/948/5879/5468
GO SYNAPTIC VESICLE MATURATION	SYNAPTIC VESICLE MATURATION	11	-0.789465	-1.74168	0.00324684	0.0222939	0.0160307	1727	tags=64%, list=9%, signal=58%	440279/1742/5864/6812/6855/57030/23025
GO CADHERIN BINDING	CADHERIN BINDING	328	0.377903	1.39947	0.00326772	0.0224147	0.0161176	3241	tags=29%, list=17%, signal=24%	301/8407/302/1192/6282/9124/114990/822/3939/9133/8826/2316/800/1266/93663/53827/23075/1969/50848/3688/3337/30844/829/6772/7408/4430/9588/5216/3309/831/10226/1265/26136/11344/8842/1956/1004/5052/10801/2023/9052/5315/51100/23670/9253/9689/5499/54874/1002/6624/1009/1003/6231/55898/1495/8353/8727/3728/51429/4627/4854/6187/8357/10606/64855/3417/10163/2810/10397/5756/5917/5901/10652/64787/57650/7414/84…
GO NEURONAL ACTION POTENTIAL	NEURONAL ACTION POTENTIAL	34	-0.604759	-1.75968	0.00329162	0.022556	0.0162192	1499	tags=32%, list=8%, signal=30%	8911/8912/288/6334/79784/6326/6323/3751/2898/2257/6328
GO NEGATIVE REGULATION OF CELL SUBSTRATE ADHESION	NEGATIVE REGULATION OF CELL SUBSTRATE ADHESION	62	0.526334	1.62224	0.00330049	0.0225715	0.0162303	1491	tags=24%, list=8%, signal=22%	5054/10631/1277/3956/2633/4323/285/7057/2192/182/8324/3204/81/10395/9723
GO POSITIVE REGULATION OF CELL KILLING	POSITIVE REGULATION OF CELL KILLING	62	0.526718	1.62343	0.00330049	0.0225715	0.0162303	2888	tags=32%, list=15%, signal=27%	7305/5819/3077/2597/2217/5551/64581/4843/3134/100507436/3133/5788/4277/2150/5817/8772/6850/563/3684/7409
GO G PROTEIN COUPLED AMINE RECEPTOR ACTIVITY	G PROTEIN COUPLED AMINE RECEPTOR ACTIVITY	59	-0.501229	-1.6404	0.0033257	0.0227212	0.0163379	4187	tags=27%, list=22%, signal=21%	3354/1812/152/154/150/1815/3361/3358/147/51222/148/3350/3356/1132/1128/11255
GO POSITIVE REGULATION OF AMINE TRANSPORT	POSITIVE REGULATION OF AMINE TRANSPORT	34	-0.604498	-1.75892	0.00333641	0.0227538	0.0163614	2168	tags=35%, list=11%, signal=31%	65018/7432/2668/6804/885/5027/18/6812/1141/6529/6860/3745
GO LEUKOCYTE AGGREGATION	LEUKOCYTE AGGREGATION	13	0.797984	1.76359	0.00333713	0.0227538	0.0163614	1075	tags=46%, list=6%, signal=44%	4478/6280/960/6279/5880/3037
GO POSITIVE REGULATION OF NEUROTRANSMITTER SECRETION	POSITIVE REGULATION OF NEUROTRANSMITTER SECRETION	23	-0.675075	-1.77316	0.00335005	0.0228191	0.0164084	2573	tags=57%, list=13%, signal=49%	8938/776/783/22871/6804/9066/143425/6622/112476/6857/6812/112755/23025
GO DECIDUALIZATION	DECIDUALIZATION	24	0.68114	1.79452	0.00337781	0.0229794	0.0165236	3240	tags=50%, list=17%, signal=42%	6696/3976/6781/2706/3726/1508/5764/1594/5743/2697/682/7421
GO CADHERIN BINDING INVOLVED IN CELL CELL ADHESION	CADHERIN BINDING INVOLVED IN CELL CELL ADHESION	18	0.721938	1.73322	0.00338148	0.0229794	0.0165236	402	tags=28%, list=2%, signal=27%	301/302/6282/9124/1266
GO DNA BIOSYNTHETIC PROCESS	DNA BIOSYNTHETIC PROCESS	189	0.401917	1.42057	0.00338368	0.0229794	0.0165236	3936	tags=33%, list=21%, signal=26%	4015/5570/7298/7083/9636/9212/1026/9768/5111/4751/6119/5478/9104/5982/1843/1063/1490/55505/51514/908/50507/26272/7314/25865/5159/3082/94/5983/10459/5427/84875/5155/5424/11284/5245/5984/64855/6118/3978/79075/2697/23649/10714/54107/199990/9246/7157/201973/6117/25913/79991/10715/5425/56655/7316/5394/80119/10576/1499/7311/143/5468
GO HETEROTYPIC CELL CELL ADHESION	HETEROTYPIC CELL CELL ADHESION	61	0.537335	1.65118	0.00339198	0.0230129	0.0165477	3983	tags=44%, list=21%, signal=35%	960/965/3678/3679/3689/3688/91663/914/5788/1829/3676/3728/3690/10211/10288/3557/7412/3685/55742/83700/3687/3586/1525/3553/342035/3932/64065
GO T CELL APOPTOTIC PROCESS	T CELL APOPTOTIC PROCESS	49	0.572769	1.68555	0.00340081	0.0230394	0.0165667	3896	tags=45%, list=20%, signal=36%	3958/6352/10945/581/3965/29126/3559/2737/27166/578/8737/1942/8915/8772/3718/171558/7474/3575/3620/7157/384/11035
GO AMINO ACID CATION SYMPORTER ACTIVITY	AMINO ACID CATION SYMPORTER ACTIVITY	19	-0.710554	-1.785	0.00340262	0.0230394	0.0165667	2247	tags=42%, list=12%, signal=37%	55117/6534/140679/6511/6506/81539/6529/6505
GO CENTRAL NERVOUS SYSTEM NEURON DEVELOPMENT	CENTRAL NERVOUS SYSTEM NEURON DEVELOPMENT	79	-0.459625	-1.58374	0.00342845	0.0231793	0.0166673	2074	tags=38%, list=11%, signal=34%	9201/5728/1399/2624/2637/6091/1630/9331/2909/5048/6900/2560/9839/51199/57731/9693/55079/57282/5881/4852/4781/429/166614/23077/6656/1141/4133/4137/4915/2047
GO ENDOPLASMIC RETICULUM UNFOLDED PROTEIN RESPONSE	ENDOPLASMIC RETICULUM UNFOLDED PROTEIN RESPONSE	122	0.452483	1.5412	0.00343007	0.0231793	0.0166673	4895	tags=46%, list=26%, signal=34%	3576/6347/467/11015/6464/4000/23645/1649/10954/56005/811/55062/3309/10130/9820/581/90993/6734/26608/578/58477/2135/57414/7184/10106/55829/4189/91319/51726/439/4780/10113/64764/5771/5611/22872/821/5770/2137/55033/1200/30001/51283/9709/9695/9451/440/10525/3484/37/8440/51009/79139/6745/7094/4690
GO MEIOTIC CHROMOSOME SEGREGATION	MEIOTIC CHROMOSOME SEGREGATION	87	0.4807	1.56151	0.00343983	0.0232223	0.0166982	3345	tags=28%, list=17%, signal=23%	9232/7153/699/10051/83540/5347/23397/701/9319/7272/55706/10609/151648/151246/9700/10096/2177/84944/378708/146956/898/83990/201254/100130958
GO POSITIVE REGULATION OF RECEPTOR MEDIATED ENDOCYTOSIS	POSITIVE REGULATION OF RECEPTOR MEDIATED ENDOCYTOSIS	51	0.547047	1.61971	0.00344996	0.0232677	0.0167309	1147	tags=22%, list=6%, signal=20%	5054/302/7422/6424/718/967/567/8862/3077/284/1191
GO CEREBELLAR PURKINJE CELL LAYER DEVELOPMENT	CEREBELLAR PURKINJE CELL LAYER DEVELOPMENT	25	-0.6501	-1.73146	0.00345839	0.02329	0.0167469	1678	tags=44%, list=9%, signal=40%	16/4628/8861/51286/8925/64211/124925/23017/6712/28514/23544
GO CHROMOSOME CONDENSATION	CHROMOSOME CONDENSATION	46	0.579324	1.69273	0.00346009	0.02329	0.0167469	1980	tags=24%, list=10%, signal=21%	891/51203/7153/983/3006/64151/10051/23397/3020/113130/54892
GO RENAL SYSTEM DEVELOPMENT	RENAL SYSTEM DEVELOPMENT	293	0.379678	1.39367	0.00351621	0.0236444	0.0170018	2972	tags=29%, list=16%, signal=25%	1282/4318/7422/7042/10252/255743/3976/5154/285/2302/157506/760/6385/8826/6382/59/3675/3217/1958/5176/25937/4435/3691/1634/1948/182/80310/25959/9104/55165/3913/9510/3237/5175/6772/1063/445/8829/2028/4811/3037/284/8692/2828/8842/581/1636/3280/2260/2297/6608/29927/10272/26508/10413/5159/2737/51668/2296/3227/10269/3399/5155/4643/10972/8772/5311/4953/4854/8642/947/25976/5420/2719/7474/51196/7046/11603…
GO INSULIN LIKE GROWTH FACTOR I BINDING	INSULIN LIKE GROWTH FACTOR I BINDING	13	0.796131	1.75949	0.00353537	0.0237266	0.0170609	571	tags=46%, list=3%, signal=45%	3485/3486/3488/3487/3691/3489
GO PYRIMIDINE NUCLEOSIDE METABOLIC PROCESS	PYRIMIDINE NUCLEOSIDE METABOLIC PROCESS	36	0.612957	1.70735	0.00353537	0.0237266	0.0170609	1345	tags=25%, list=7%, signal=23%	1890/1806/27350/7378/7083/60489/1841/9582/200316
GO AZUROPHIL GRANULE MEMBRANE	AZUROPHIL GRANULE MEMBRANE	55	0.547701	1.6434	0.0035466	0.0237786	0.0170983	3056	tags=42%, list=16%, signal=35%	684/967/2357/8673/11010/1650/54918/5908/84061/719/25798/9545/5547/4257/374395/150372/6836/10970/23385/2683/79888/968/3920
GO OXIDATIVE PHOSPHORYLATION	OXIDATIVE PHOSPHORYLATION	128	0.456795	1.56175	0.00355487	0.0238107	0.0171213	6033	tags=58%, list=32%, signal=40%	891/983/5230/205/9551/2631/440567/400916/4696/4725/27089/1340/54205/1349/515/1346/518/10975/4697/514/7386/4713/6392/7388/215/10476/1329/51079/4695/30968/1337/4707/4708/29796/9377/388753/84701/387/4717/4711/1351/4700/55967/516/1347/4710/4709/79736/4728/4694/10632/4706/4701/4712/4726/4436/790955/11315/4729/522/7384/4702/1738/513/539/84277/1537/4731/54539/126328/506/9167/521/538
GO PATTERN RECOGNITION RECEPTOR ACTIVITY	PATTERN RECOGNITION RECEPTOR ACTIVITY	21	0.704566	1.75865	0.00356537	0.0238576	0.0171551	3735	tags=57%, list=20%, signal=46%	23643/929/7097/81035/85363/64581/8685/5724/26253/51311/51284/948
GO REGULATION OF DNA DAMAGE RESPONSE SIGNAL TRANSDUCTION BY P53 CLASS MEDIATOR	REGULATION OF DNA DAMAGE RESPONSE SIGNAL TRANSDUCTION BY P53 CLASS MEDIATOR	35	0.605235	1.67646	0.00358801	0.0239856	0.0172471	2513	tags=40%, list=13%, signal=35%	972/960/7291/6591/200734/56950/399473/6615/8444/4193/161742/10269/4282/4487
GO REGULATION OF CD4 POSITIVE ALPHA BETA T CELL DIFFERENTIATION	REGULATION OF CD4 POSITIVE ALPHA BETA T CELL DIFFERENTIATION	46	0.578208	1.68947	0.00359446	0.0239989	0.0172567	3044	tags=39%, list=16%, signal=33%	301/8651/54440/861/3606/84695/64332/3965/942/864/51043/3566/3718/80149/865/3071/3142/9308
GO INTERLEUKIN 1 SECRETION	INTERLEUKIN 1 SECRETION	59	0.530338	1.62213	0.00359702	0.0239989	0.0172567	4453	tags=44%, list=23%, signal=34%	6288/114769/6284/79792/834/1992/29108/3965/7128/2150/7855/11027/115362/80149/7474/353514/7850/51311/113277/80772/384/948/2621/5371/58484/22900
GO T CELL SELECTION	T CELL SELECTION	47	0.579782	1.70162	0.00360881	0.024054	0.0172963	6066	tags=62%, list=32%, signal=42%	972/84695/5788/920/915/10538/2737/3569/916/6774/6850/6778/387/5771/6693/114836/2625/912/7535/1794/9474/3600/3594/1236/3707/940/51561/917/30009
GO REGULATION OF T CELL MEDIATED IMMUNITY	REGULATION OF T CELL MEDIATED IMMUNITY	69	0.509697	1.60673	0.00365648	0.024348	0.0175077	2883	tags=36%, list=15%, signal=31%	567/54440/5819/3077/3606/2217/91543/2213/3554/3134/100507436/3133/5788/4277/7133/7855/3569/5817/8772/54795/10859/7784/563/3575/7454
GO THREONINE TYPE PEPTIDASE ACTIVITY	THREONINE TYPE PEPTIDASE ACTIVITY	20	0.711558	1.75443	0.00370839	0.0246697	0.017739	4080	tags=65%, list=21%, signal=51%	5696/5698/5688/5686/5692/5691/5682/5683/5690/5689/5699/5684/5685
GO POSITIVE REGULATION OF CELLULAR EXTRAVASATION	POSITIVE REGULATION OF CELLULAR EXTRAVASATION	17	0.72283	1.70882	0.00371502	0.0246897	0.0177534	2318	tags=53%, list=12%, signal=47%	4192/3383/4267/80310/83483/3554/3676/8772/5724
GO PRESYNAPTIC CYTOSOL	PRESYNAPTIC CYTOSOL	14	-0.750474	-1.76436	0.00373011	0.0247651	0.0178076	2677	tags=64%, list=14%, signal=55%	793/114088/3064/23413/1488/134957/5582/5579/6456
GO NEGATIVE REGULATION OF EPITHELIAL CELL APOPTOTIC PROCESS	NEGATIVE REGULATION OF EPITHELIAL CELL APOPTOTIC PROCESS	40	0.577938	1.64437	0.00373361	0.0247651	0.0178076	1381	tags=20%, list=7%, signal=19%	5054/4192/3162/3383/51129/284/831/7128
GO DNA PACKAGING	DNA PACKAGING	204	0.402162	1.43663	0.00374832	0.0248385	0.0178604	3730	tags=29%, list=19%, signal=24%	891/55723/85236/51203/7153/79682/1058/983/3006/55355/64151/4171/3148/10051/23397/8208/8345/64105/11339/79019/3020/201161/387103/64946/23421/8970/3014/113130/8365/8294/3159/55839/91687/8353/84875/54892/3017/83743/8357/378708/10036/57798/8520/8349/8347/5928/57082/2491/1029/6662/54107/201254/55320/9918/7157/8260/8348/148479/8351/8363
GO MITOCHONDRIAL LARGE RIBOSOMAL SUBUNIT	MITOCHONDRIAL LARGE RIBOSOMAL SUBUNIT	57	0.554547	1.68031	0.00379876	0.025146	0.0180816	5462	tags=60%, list=29%, signal=43%	64979/64981/115416/51253/64983/55168/28998/29088/57129/55052/63875/84769/29093/54148/3396/128308/9553/65003/6150/51069/740/64928/4706/387338/51073/64976/65005/64975/116541/51258/219927/6182/51264/122704
GO REGULATION OF DEFENSE RESPONSE TO VIRUS BY HOST	REGULATION OF DEFENSE RESPONSE TO VIRUS BY HOST	37	0.614411	1.72829	0.00380209	0.025146	0.0180816	5191	tags=62%, list=27%, signal=45%	83666/60489/6772/151636/29108/200316/7128/4277/340061/79594/115004/10859/80149/117854/6895/23586/3553/163702/10758/440275/3600/4321/3594
GO RESPONSE TO INTERLEUKIN 12	RESPONSE TO INTERLEUKIN 12	50	0.563246	1.66386	0.00381975	0.0252384	0.018148	2377	tags=28%, list=12%, signal=25%	302/4478/6648/5478/829/998/5034/3936/1265/4001/5908/5721/4282/9446
GO VISUAL BEHAVIOR	VISUAL BEHAVIOR	52	-0.509961	-1.6419	0.00382372	0.0252402	0.0181493	2372	tags=35%, list=12%, signal=30%	23259/5153/2903/54413/4212/3815/8831/3156/4763/10522/477/338811/65009/81832/885/6506/1141/2902
GO PROTEASOME CORE COMPLEX	PROTEASOME CORE COMPLEX	20	0.708842	1.74774	0.00384203	0.0253366	0.0182186	4080	tags=65%, list=21%, signal=51%	5696/5698/5688/5686/5692/5691/5682/5683/5690/5689/5699/5684/5685
GO COMPLEMENT ACTIVATION ALTERNATIVE PATHWAY	COMPLEMENT ACTIVATION ALTERNATIVE PATHWAY	14	0.757941	1.70072	0.00386024	0.0254322	0.0182873	1968	tags=36%, list=10%, signal=32%	718/11326/3075/1675/730
GO ESTROUS CYCLE	ESTROUS CYCLE	15	0.751513	1.72144	0.00386577	0.0254441	0.0182959	1195	tags=47%, list=6%, signal=44%	4192/1958/5111/5021/5764/3037/4316
GO SECRETORY GRANULE LOCALIZATION	SECRETORY GRANULE LOCALIZATION	12	-0.768633	-1.73757	0.00391511	0.0257007	0.0184804	2778	tags=75%, list=15%, signal=64%	10125/10749/3799/55638/23095/4644/4133/3798/547
GO NEGATIVE REGULATION OF HUMORAL IMMUNE RESPONSE	NEGATIVE REGULATION OF HUMORAL IMMUNE RESPONSE	12	0.779344	1.69012	0.00391565	0.0257007	0.0184804	1855	tags=50%, list=10%, signal=45%	710/2302/11326/2213/2/5777
GO PROTEIN ACYLATION	PROTEIN ACYLATION	242	-0.355661	-1.39663	0.00391604	0.0257007	0.0184804	3946	tags=35%, list=21%, signal=28%	85459/10902/6598/84148/84656/6877/8202/6872/27097/57325/51104/79844/51230/8888/9329/4204/64840/93624/3054/8193/23326/51201/11143/284058/55274/10664/5494/5495/84289/57634/55167/8850/122830/10847/2624/9252/23338/23774/55689/23390/29117/339287/2932/340481/10411/57551/8464/8648/54386/23558/79960/7994/27154/2033/7703/9397/4654/51562/112869/1387/25999/51773/80314/2648/6622/8861/55209/23411/322/28999/79…
GO OXIDOREDUCTASE ACTIVITY OXIDIZING METAL IONS	OXIDOREDUCTASE ACTIVITY OXIDIZING METAL IONS	18	0.717018	1.72141	0.00392982	0.0257663	0.0185276	2414	tags=39%, list=13%, signal=34%	55240/1356/2512/79901/1534/2495/11068
GO MECHANOSENSORY BEHAVIOR	MECHANOSENSORY BEHAVIOR	15	-0.742646	-1.78804	0.0039392	0.0258031	0.018554	1177	tags=47%, list=6%, signal=44%	93986/3064/85358/2115/9379/26047/9378
GO RESPONSE TO NUTRIENT	RESPONSE TO NUTRIENT	216	0.401517	1.44113	0.00395153	0.0258537	0.0185904	2589	tags=24%, list=14%, signal=21%	3485/10631/1277/6696/3627/3939/3371/3162/7298/4982/57817/6781/706/1535/5111/6591/25959/1268/5764/6772/1728/717/445/3673/5028/958/1536/2242/5292/2348/1956/4193/6263/2730/920/5315/6566/7048/1594/916/5251/2281/3155/54795/7184/9227/10518/7412/5743/191/8520/2180
GO BETA CATENIN BINDING	BETA CATENIN BINDING	83	-0.454818	-1.58606	0.00395449	0.0258537	0.0185904	2454	tags=33%, list=13%, signal=28%	283149/57658/2932/8313/23426/147906/5071/2309/57680/23189/6934/324/2033/83439/23135/1501/51684/55966/8945/4092/4303/29119/9231/10297/205147/219287/11122
GO CELL CORTEX REGION	CELL CORTEX REGION	42	-0.559051	-1.7112	0.00396997	0.0259301	0.0186453	2899	tags=52%, list=15%, signal=45%	27445/2035/1496/23332/1639/2037/1488/10121/440279/140730/26059/22999/8541/9783/4926/5590/23122/9699/2770/8927/89958/23025
GO SYNAPTIC VESICLE LOCALIZATION	SYNAPTIC VESICLE LOCALIZATION	58	-0.508559	-1.66081	0.00400359	0.0261218	0.0187832	2899	tags=43%, list=15%, signal=37%	27445/5728/6517/84446/65018/5071/27253/54413/1759/22871/8867/3799/6622/8224/8120/57555/3800/6854/5864/9024/4133/3798/6853/26052/9892
GO NEGATIVE REGULATION OF LYASE ACTIVITY	NEGATIVE REGULATION OF LYASE ACTIVITY	30	-0.601296	-1.67468	0.00400697	0.0261218	0.0187832	2820	tags=30%, list=15%, signal=26%	2912/9495/10142/3208/5064/2913/1910/84059/9568
GO MATERNAL PLACENTA DEVELOPMENT	MATERNAL PLACENTA DEVELOPMENT	35	0.600549	1.66349	0.00403253	0.0262633	0.018885	3380	tags=46%, list=18%, signal=38%	6696/3976/6781/2706/3726/1508/5764/7026/10959/4838/1594/5743/2697/682/7421/639
GO CYCLIC NUCLEOTIDE MEDIATED SIGNALING	CYCLIC NUCLEOTIDE MEDIATED SIGNALING	208	-0.361231	-1.40327	0.00404022	0.0262675	0.018888	2711	tags=23%, list=14%, signal=20%	3361/5575/23432/118442/59350/3358/83873/147/1609/5152/5745/6343/148/10411/333/7432/2740/5141/1979/8844/114/9693/1394/7349/348/23284/3747/5578/22859/1910/8549/51555/108/7253/9699/2770/111/9472/577/4878/575/2774/10203/11069/117/5138/10900/1113
GO SOLUTE SODIUM SYMPORTER ACTIVITY	SOLUTE SODIUM SYMPORTER ACTIVITY	75	-0.476393	-1.62855	0.00404086	0.0262675	0.018888	1786	tags=17%, list=9%, signal=16%	55117/115584/6534/9962/57282/8671/6511/388662/6506/81539/6529/57030/6505
GO POSITIVE REGULATION OF NITRIC OXIDE SYNTHASE BIOSYNTHETIC PROCESS	POSITIVE REGULATION OF NITRIC OXIDE SYNTHASE BIOSYNTHETIC PROCESS	15	0.749865	1.71766	0.00406401	0.0263929	0.0189781	1044	tags=33%, list=5%, signal=32%	10135/6347/7097/6772/9590
GO INVADOPODIUM	INVADOPODIUM	16	0.736558	1.71719	0.00413009	0.0267711	0.0192501	2914	tags=62%, list=15%, signal=53%	10630/4478/5329/3675/134265/3688/1803/6624/2191/6840
GO REGULATION OF NEUTROPHIL MIGRATION	REGULATION OF NEUTROPHIL MIGRATION	36	0.608022	1.69361	0.00413009	0.0267711	0.0192501	4051	tags=50%, list=21%, signal=39%	972/4192/3576/728/5880/4267/56833/7060/719/3554/683/391/3071/83700/708/5879/3579/8291
GO REGULATION OF HORMONE SECRETION	REGULATION OF HORMONE SECRETION	260	-0.344872	-1.36446	0.00413566	0.0267818	0.0192578	2608	tags=25%, list=14%, signal=22%	10765/6720/8938/776/9854/3358/775/1393/5950/6755/4760/9572/6343/10411/5071/9515/7074/5781/8997/6934/1908/2740/91608/6804/6453/94121/5530/3799/9066/143425/114/3350/3156/4828/55638/1394/777/7349/8447/8398/3747/9254/5578/5532/408/18/5581/57555/773/55636/7447/9024/111/6659/4878/2746/952/6616/2850/11069/6833/375704/3745/3767
GO REGULATION OF STEM CELL DIFFERENTIATION	REGULATION OF STEM CELL DIFFERENTIATION	115	0.449835	1.52045	0.00415033	0.0268514	0.0193078	4311	tags=46%, list=23%, signal=36%	7042/8463/1482/4005/5696/182/5698/5764/861/5714/678/3214/81606/5701/3280/1021/10413/5008/5688/5721/5704/2296/5978/5686/6774/5692/5711/5691/4004/865/5682/117854/5683/51441/5690/6662/7161/5689/54517/4780/5720/5700/10213/5699/221662/5718/5684/2626/5719/5685/5715/5708/2625
GO NUCLEOSIDE CATABOLIC PROCESS	NUCLEOSIDE CATABOLIC PROCESS	32	0.630886	1.71289	0.00415457	0.0268534	0.0193093	2647	tags=38%, list=14%, signal=32%	1890/1806/27350/7378/60489/51816/9582/200316/4860/140564/191/978
GO CEREBELLAR PURKINJE CELL LAYER MORPHOGENESIS	CEREBELLAR PURKINJE CELL LAYER MORPHOGENESIS	14	-0.747445	-1.75724	0.00416508	0.0268592	0.0193134	1116	tags=50%, list=6%, signal=47%	8861/51286/8925/64211/23017/6712/28514
GO L GLUTAMATE IMPORT	L GLUTAMATE IMPORT	14	-0.747151	-1.75655	0.00416508	0.0268592	0.0193134	930	tags=57%, list=5%, signal=54%	8864/2055/477/6511/3766/6506/57030/6505
GO CELLULAR RESPONSE TO EXOGENOUS DSRNA	CELLULAR RESPONSE TO EXOGENOUS DSRNA	17	0.71784	1.69702	0.00416727	0.0268592	0.0193134	3320	tags=65%, list=17%, signal=54%	857/81035/64135/3661/340061/79594/115004/10211/5899/7098/23586
GO POSITIVE REGULATION OF INSULIN SECRETION	POSITIVE REGULATION OF INSULIN SECRETION	73	-0.470911	-1.59502	0.00417695	0.0268963	0.0193401	3546	tags=34%, list=19%, signal=28%	25924/1392/2182/5019/2822/1080/8938/9854/5950/6934/3799/114/55638/8447/8398/5532/408/18/5581/57555/7447/6659/2746/952/2850
GO NUCLEOBASE CONTAINING SMALL MOLECULE CATABOLIC PROCESS	NUCLEOBASE CONTAINING SMALL MOLECULE CATABOLIC PROCESS	49	0.565609	1.66448	0.00418328	0.0269116	0.0193511	2697	tags=31%, list=14%, signal=26%	1890/1806/27350/7378/60489/51816/9582/200316/4860/954/4245/140564/191/978/4521
GO HOMEOSTASIS OF NUMBER OF CELLS	HOMEOSTASIS OF NUMBER OF CELLS	240	0.394386	1.42774	0.00419984	0.0269927	0.0194095	3584	tags=30%, list=19%, signal=25%	301/7422/972/3202/3162/2207/9133/9636/7538/3148/10312/54440/6772/6688/3059/1880/10673/836/4067/30061/3304/8444/581/202309/5052/3965/7128/6608/2149/2146/1021/3559/578/3569/3276/54892/2539/4282/4856/10019/8915/8772/6774/3718/23385/4004/116151/669/3071/11151/3575/6223/51522/1000/6662/1054/29985/83700/1777/3635/8740/2176/2271/29766/3574/5293/27240/677/6372/5771/5925/9991
GO POSITIVE REGULATION OF TRANSCRIPTION FROM RNA POLYMERASE II PROMOTER IN RESPONSE TO ENDOPLASMIC RETICULUM STRESS	POSITIVE REGULATION OF TRANSCRIPTION FROM RNA POLYMERASE II PROMOTER IN RESPONSE TO ENDOPLASMIC RETICULUM STRESS	11	0.800322	1.71814	0.00420776	0.0270183	0.0194278	1386	tags=45%, list=7%, signal=42%	467/1051/1649/3309/90993
GO RETROGRADE AXONAL TRANSPORT	RETROGRADE AXONAL TRANSPORT	18	-0.701812	-1.73672	0.00422306	0.027091	0.0194801	1832	tags=56%, list=10%, signal=50%	5048/3799/23095/1778/667/1740/4747/4130/3798/547
GO RESPONSE TO NERVE GROWTH FACTOR	RESPONSE TO NERVE GROWTH FACTOR	52	-0.506086	-1.62942	0.00422888	0.027098	0.0194851	2138	tags=46%, list=11%, signal=41%	2889/23527/6863/5170/85377/66000/10938/5728/867/1783/4916/57498/3397/1938/2648/9693/3746/3747/23095/8936/11075/4137/4915/6456
GO NMDA SELECTIVE GLUTAMATE RECEPTOR COMPLEX	NMDA SELECTIVE GLUTAMATE RECEPTOR COMPLEX	11	-0.781534	-1.72418	0.00423208	0.027098	0.0194851	2477	tags=73%, list=13%, signal=63%	2906/2903/22871/2904/2905/50944/116443/2902
GO REGULATION OF SYSTEMIC ARTERIAL BLOOD PRESSURE	REGULATION OF SYSTEMIC ARTERIAL BLOOD PRESSURE	93	0.483754	1.58971	0.00425101	0.0271938	0.019554	3464	tags=29%, list=18%, signal=24%	10631/133/6648/1535/1889/1522/5021/134/7026/2028/1636/2013/2149/5547/2150/84909/5155/146/6518/367/2697/585/5125/1066/10159/387/5345
GO NEGATIVE REGULATION OF INTERLEUKIN 1 SECRETION	NEGATIVE REGULATION OF INTERLEUKIN 1 SECRETION	16	0.736362	1.71673	0.00426225	0.0272147	0.019569	4453	tags=56%, list=23%, signal=43%	114769/1992/7128/80149/7850/80772/2621/5371/22900
GO RESPIRATORY CHAIN COMPLEX IV	RESPIRATORY CHAIN COMPLEX IV	16	0.734459	1.71229	0.00426225	0.0272147	0.019569	3691	tags=62%, list=19%, signal=50%	56901/84419/1340/1349/4697/7386/1337/9377/84701/1351
GO CELLULAR RESPONSE TO BRAIN DERIVED NEUROTROPHIC FACTOR STIMULUS	CELLULAR RESPONSE TO BRAIN DERIVED NEUROTROPHIC FACTOR STIMULUS	10	-0.805315	-1.75915	0.00427686	0.0272346	0.0195834	1387	tags=50%, list=7%, signal=46%	1938/8936/4137/4915/6456
GO LOCOMOTORY EXPLORATION BEHAVIOR	LOCOMOTORY EXPLORATION BEHAVIOR	11	-0.780564	-1.72204	0.00427686	0.0272346	0.0195834	1186	tags=64%, list=6%, signal=60%	57282/1742/348/5581/57555/2571/7143
GO CLATHRIN COATED ENDOCYTIC VESICLE	CLATHRIN COATED ENDOCYTIC VESICLE	57	0.553177	1.67616	0.00427734	0.0272346	0.0195834	2076	tags=30%, list=11%, signal=27%	3122/3123/3115/3113/972/3117/3127/3119/3118/1175/3120/2535/2209/928/1839/7855/4643
GO VESICLE MEDIATED TRANSPORT TO THE PLASMA MEMBRANE	VESICLE MEDIATED TRANSPORT TO THE PLASMA MEMBRANE	92	-0.449397	-1.59116	0.00428337	0.0272476	0.0195927	4159	tags=51%, list=22%, signal=40%	54520/9919/149371/57182/22883/9559/85377/57020/163882/27065/80852/10564/23513/4905/10640/25837/23499/9581/261729/54536/583/81609/10133/57554/169166/55770/9135/23233/6711/2803/253725/26088/23426/3996/57120/56850/288/55227/6844/403/9912/29091/5602/63971/6616/112755/10815
GO ADENYLATE CYCLASE INHIBITING G PROTEIN COUPLED RECEPTOR SIGNALING PATHWAY	ADENYLATE CYCLASE INHIBITING G PROTEIN COUPLED RECEPTOR SIGNALING PATHWAY	86	-0.443263	-1.56489	0.00429912	0.0273224	0.0196465	1363	tags=20%, list=7%, signal=18%	1901/5064/114/2781/3350/2913/64805/1132/108/2770/111/1128/2774/11255/6752/5138/2550
GO POSITIVE REGULATION OF APOPTOTIC SIGNALING PATHWAY	POSITIVE REGULATION OF APOPTOTIC SIGNALING PATHWAY	174	0.413317	1.44277	0.00431194	0.0273784	0.0196868	3950	tags=35%, list=21%, signal=28%	51330/4318/6280/50486/857/6279/5329/467/7057/1075/355/162989/4055/1649/29108/2923/8692/1869/581/3965/400916/841/5788/8406/8743/7314/578/80758/5499/8737/9141/1495/79156/8915/8772/10134/835/2810/4487/4776/6201/7046/2934/8742/7161/5580/53832/84231/81618/4170/7157/5771/26355/11124/5326/3932/598/11035/3625/3002/10971
GO INWARD RECTIFIER POTASSIUM CHANNEL ACTIVITY	INWARD RECTIFIER POTASSIUM CHANNEL ACTIVITY	20	-0.688143	-1.74619	0.00431963	0.0274018	0.0197036	1208	tags=40%, list=6%, signal=38%	3773/3768/3775/3761/3760/3766/3767/3765
GO REGULATION OF CELL CYCLE G2 M PHASE TRANSITION	REGULATION OF CELL CYCLE G2 M PHASE TRANSITION	209	0.40195	1.4339	0.00432795	0.0274291	0.0197232	3720	tags=33%, list=19%, signal=27%	891/22974/1017/9212/6790/5696/983/5698/4751/22809/5347/51512/1063/990/1019/5714/51514/7846/4998/8444/3161/5701/995/115106/641/54820/1111/5688/5721/10383/5704/7283/5686/9928/63967/1069/672/10733/5692/5711/5691/203068/8655/121441/3364/5682/26271/5683/8636/993/5690/29980/994/60561/5689/9662/5566/5720/93323/23354/5700/7157/10213/5699/4957/8317/55920/5718/23194/5684
GO POSITIVE REGULATION OF PEPTIDYL TYROSINE PHOSPHORYLATION	POSITIVE REGULATION OF PEPTIDYL TYROSINE PHOSPHORYLATION	190	0.404682	1.43243	0.00434967	0.0275412	0.0198038	2058	tags=24%, list=11%, signal=22%	9021/7422/972/960/3678/3976/7132/23529/8826/3383/54209/6352/1489/83666/8764/7060/30844/5175/3059/3606/134/8829/2209/4067/7040/284/958/1636/3280/5788/653361/920/50507/3481/5008/3082/4739/1839/1942/3569/54625/54892/916/4282/5155/3690
GO MACROPHAGE CHEMOTAXIS	MACROPHAGE CHEMOTAXIS	37	0.6124	1.72263	0.00436018	0.0275822	0.0198333	1315	tags=30%, list=7%, signal=28%	5919/3958/6288/4192/6347/7057/728/6352/56833/51192/719
GO HINDBRAIN DEVELOPMENT	HINDBRAIN DEVELOPMENT	149	-0.39048	-1.4647	0.00437578	0.0276552	0.0198858	3399	tags=38%, list=18%, signal=32%	23513/93986/4204/6753/596/1152/23287/58155/473/5629/25/65250/8455/1399/2624/1496/4760/10716/80184/4040/4761/2637/5270/23543/8648/5781/22891/16/146057/4628/5802/2648/8861/4781/429/3746/51286/8925/23026/85442/18/64211/2895/124925/8941/8851/1272/869/23017/6751/4983/6752/6712/2902/28514/23544/9241
GO MICROTUBULE DEPOLYMERIZATION	MICROTUBULE DEPOLYMERIZATION	44	-0.53726	-1.65876	0.00441543	0.02788	0.0200475	3800	tags=59%, list=20%, signal=47%	9181/10013/57701/9793/10300/344148/58526/6683/50810/89927/89795/23332/57551/50861/324/146057/157922/2258/3796/23271/23122/10297/4130/81551/11075/57662
GO HISTONE EXCHANGE	HISTONE EXCHANGE	60	0.533074	1.62869	0.00442515	0.0279156	0.020073	4034	tags=43%, list=21%, signal=34%	79682/1058/55355/64105/11339/79019/5757/387103/64946/23421/8365/8294/55839/91687/378708/10467/5928/57082/2491/54107/201254/55320/8363/8367/8607/54069
GO POSITIVE REGULATION OF GLUTAMATE SECRETION	POSITIVE REGULATION OF GLUTAMATE SECRETION	10	-0.803671	-1.75556	0.00445599	0.0280843	0.0201943	715	tags=40%, list=4%, signal=39%	885/5027/6812/6860
GO ANTIGEN PROCESSING AND PRESENTATION OF ENDOGENOUS PEPTIDE ANTIGEN	ANTIGEN PROCESSING AND PRESENTATION OF ENDOGENOUS PEPTIDE ANTIGEN	15	0.747126	1.71139	0.00446049	0.0280853	0.020195	4735	tags=93%, list=25%, signal=70%	567/3077/6890/2217/3134/100507436/3133/4277/563/64167/6892/6891/51752/3135
[truncated: 246 more rows]
